# Supplementary material for: Global, regional, and national disability-adjusted life-years (DALYs) for 315 diseases and injuries and healthy life expectancy (HALE), 1990–2015: a systematic analysis for the Global Burden of Disease Study 2015
Source: PubMed Central journal article supplement (PMC5388857; doi:10.1016/s0140-6736(16)31460-x), 2016-10-08

# THE LANCET

## Supplementary appendix

This appendix formed part of the original submission and has been peer reviewed. We post it as supplied by the authors.

Supplement to: GBD 2015 DALYs and HALE Collaborators. Global, regional, and national disability-adjusted life-years (DALYs) for 315 diseases and injuries and healthy life expectancy (HALE), 1990–2015: a systematic analysis for the Global Burden of Disease Study 2015. *Lancet* 2016; **388**: 1603–58.

**Appendix to Global, regional, and national disability-adjusted life years (DALYs) for 315 diseases and injuries and healthy life expectancy (HALE) for 195 countries and territories, 1990-2015: a systematic analysis for the Global Burden of Diseases, Injuries, and Risk Factors (GBD) 2015 Study**

This appendix provides methodological detail, supplemental figures, and more detailed results for disability-adjusted life years and healthy life expectancy. The appendix is organized into broad sections following the structure of the main paper.

## Preamble

This appendix provides methodological detail and more detailed results for disability-adjusted life years and healthy life expectancy. This study complies with the Guidelines for Accurate and Transparent Health Estimates Reporting (GATHER) recommendations. It includes detailed tables and information on data in an effort to maximize transparency in our estimation processes and provide a comprehensive description of analytical steps. We intend this to be a living document, to be updated with each annual iteration of the Global Burden of Disease.

## Table of Contents

|                                                                                                                                                                                                                                    |    |
|------------------------------------------------------------------------------------------------------------------------------------------------------------------------------------------------------------------------------------|----|
| Preamble .....                                                                                                                                                                                                                     | 2  |
| Section 1. Socio-Demographic Index (SDI) analysis & Epidemiological Transition .....                                                                                                                                               | 4  |
| Section 2. GATHER Compliance Table .....                                                                                                                                                                                           | 6  |
| Appendix Table 1. GATHER checklist of information that should be included in reports of global health estimates, with description of compliance and location of information for GBD 2015 DALYs and HALE capstone.....              | 6  |
| Section 2. Supplementary Results .....                                                                                                                                                                                             | 11 |
| Appendix Table 2. Life expectancy at birth and HALE at birth and at age 65 by location for GBD years 1990 - 2015, both sexes combined.....                                                                                         | 12 |
| Appendix Table 3. DALYs for all causes and level 1 cause groups by location for 1990 - 2015, both sexes combined.....                                                                                                              | 17 |
| Appendix Table 4. Rate of DALYs per 100,000 individuals for all causes and level 1 cause groups by location for 1990 - 2015, both sexes combined. ....                                                                             | 39 |
| Appendix Table 5. Socio-Demographic Index (SDI) values for all estimated GBD 2015 locations, 1980-2015. ....                                                                                                                       | 74 |
| Appendix Figure 1. Co-evolution of the proportion of DALYs due to YLDs with SDI for the globe and GBD regions from 1990 to 2015, with comparison to the value of expected proportion of DALYs due to YLDs based on SDI alone. .... | 81 |
| Appendix Figure 2. Years of functional health lost computed as life expectancy at birth minus HALE at birth for both sexes combined, 2015.....                                                                                     | 82 |
| Appendix Figure 3. Observed HALE at birth minus expected HALE at birth for both sexes combined, 2015. ....                                                                                                                         | 83 |
| Appendix Figure 4. Ratio of observed versus expected age-standardised DALY rates (per 100,000) on the basis of SDI alone for both sexes combined, 2005. ....                                                                       | 84 |
| Appendix Figure 5A. Comparisons of GBD 2015 HALE at birth with WHO 2015 HALE at birth.....                                                                                                                                         | 85 |
| Appendix Figure 5B. Comparisons of GBD 2014 HALE at birth with EC 2014 HALE at birth. ....                                                                                                                                         | 86 |
| Appendix Figure 5C. Comparisons of GBD 2014 HALE at age 65 with EC 2014 HALE at age 65.....                                                                                                                                        | 87 |

## Section 1. Socio-Demographic Index (SDI) analysis & Epidemiological Transition

We began exploring the relationship between a composite indicator of socio-demographic development in GBD 2013 DALYs. We used lag distributed income per capita (LDI), average educational attainment over the age 15 years, total fertility rate (TFR), and mean population age and called it SDS, socio-demographic status. In response to feedback, we excluded mean population age due its strong relationship to mortality rates. We renamed the indicator Socio-Demographic Index (SDI). SDI has an interpretable scale: zero represents the lowest income per capita, lowest educational attainment, and highest TFR observed across all GBD geographies from 1980 to 2015 and one represents the highest income per capita, highest educational attainment, and lowest TFR.

SDI was calculated using the Human Development Index (HDI) methodology, wherein an index value was determined for each covariate input (log LDI, average educational attainment in the population over age 15, and TFR):

$$I_{cly} = \frac{(C_{ly} - \min(C))}{(\max(C) - \min(C))}$$

Where  $I_{cly}$  – the index for covariate  $C$ , location  $l$ , and year  $y$  – is equal to the difference between the value of that covariate in that location-year and the minimum observed value of the covariate ( $\min(C)$ ) in any location over the 1980-2015 time interval divided by the observed range ( $\max(C)-\min(C)$ ). An additional innovation for GBD 2015 was to incorporate subnational locations where estimated (resulting in 519 unique administrative units) for the entire estimation period of 1980-2015. The Socio-Demographic Index is then the geometric mean of these three indices:

$$SDI = \sqrt[3]{I_{lnLDI}I_{educ}I_{TFR}}$$

In our mortality analyses, for LDI and TFR, we noted depreciating gains in life expectancy at birth and 5q0 at the higher and lower terminals, respectively. Due to the significance of these values in indexing, we aimed to identify the point at which increasing income or reducing fertility no longer resulted in improved child mortality or life expectancy. We tested various restrictions, and found that capping LDI at \$60,000 and setting a TFR floor at 1 resulted in improved correlations with the resultant health indicators.

We further aimed to validate the use of SDI by regressing it in a variety of forms against life expectancy at birth, 5q0, 35q15, and 20q50. We found that SDI generally is as capable of predicting these demographic indicators as the previous SDS, and also as the inputs. We also found that in incorporating year, we did not substantially reduce the coefficients for SDI. Additionally, in testing lags of 2-10 years, we found the version with no lag to be the most predictive. Appendix Table 5. SDI values by GBD geography over time illustrates these results more in-depth.

We derived expected DALYs on the basis of SDI using the separate YLL and YLD models described in the

GBD 2015 mortality and non-fatal papers.<sup>1</sup> Additionally, HALE was calculated using the same methods described in the main text of this paper, with expected YLD rates and expected life tables as inputs.

---

<sup>1</sup> GBD 2015 Mortality and Causes of Death Collaborators. Global, regional, and national life expectancy, all-cause and cause-specific mortality for 249 causes of death, 1980–2015: a systematic analysis for the Global Burden of Disease Study 2015. *The Lancet* Under review.

GBD 2015 Diseases and Injury Incidence and Prevalence Collaborators. Global, regional, and national incidence, prevalence, and years lived with disability (YLDs) for 310 acute and chronic diseases and injuries, 1990-2015: a systematic analysis for the Global Burden of Disease Study 2015. *The Lancet* Under review.

## Section 2. GATHER Compliance Table

Appendix Table 1. GATHER checklist of information that should be included in reports of global health estimates, with description of compliance and location of information for GBD 2015 DALYs and HALE capstone

| #                                                                                           | GATHER checklist item                                                               | Description of compliance                                                                      | Reference                                                                                                                                                                                                                                                                                                                                                                                                                                                                                                                                                                                                                     |
|---------------------------------------------------------------------------------------------|-------------------------------------------------------------------------------------|------------------------------------------------------------------------------------------------|-------------------------------------------------------------------------------------------------------------------------------------------------------------------------------------------------------------------------------------------------------------------------------------------------------------------------------------------------------------------------------------------------------------------------------------------------------------------------------------------------------------------------------------------------------------------------------------------------------------------------------|
| <b>Objectives and funding</b>                                                               |                                                                                     |                                                                                                |                                                                                                                                                                                                                                                                                                                                                                                                                                                                                                                                                                                                                               |
| 1                                                                                           | Define the indicators, populations, and time periods for which estimates were made. | Narrative provided in paper describing indicators, definitions, time periods, and populations. | Main text (Introduction, Methods)                                                                                                                                                                                                                                                                                                                                                                                                                                                                                                                                                                                             |
| 2                                                                                           | List the funding sources for the work.                                              | Funding sources listed in paper.                                                               | Main text (Summary, Funding)                                                                                                                                                                                                                                                                                                                                                                                                                                                                                                                                                                                                  |
| <b>Data Inputs</b>                                                                          |                                                                                     |                                                                                                |                                                                                                                                                                                                                                                                                                                                                                                                                                                                                                                                                                                                                               |
| <i>For all data inputs from multiple sources that are synthesized as part of the study:</i> |                                                                                     |                                                                                                |                                                                                                                                                                                                                                                                                                                                                                                                                                                                                                                                                                                                                               |
| 3                                                                                           | Describe how the data were identified and how the data were accessed.               | All data seeking methodology referenced in main text.                                          | <ol style="list-style-type: none"> <li>1. Main text (Methods)</li> <li>2. Main text from citation 12 (Methods, Nonfatal outcome estimation)</li> <li>3. Appendix from citation 12 (Parts 1-3)</li> <li>4. Main text from citation 20 (Methods)</li> <li>5. Appendix from citation 20 (Section 2. Nonfatal outcome estimation, Step 1. Data sources, identification and extraction)</li> </ol> <p><i>Citations</i></p> <p>12 GBD 2015 Mortality and Causes of Death Collaborators. Global, regional, and national life expectancy, all-cause and cause-specific mortality for 249 causes of death, 1980–2015: a systematic</p> |

|   |                                                                                                                                                                                                                                                                                                                                               |                                                                                                                                                |                                                                                                                                                                                                                                                                                                                                                                                                                                                                               |
|---|-----------------------------------------------------------------------------------------------------------------------------------------------------------------------------------------------------------------------------------------------------------------------------------------------------------------------------------------------|------------------------------------------------------------------------------------------------------------------------------------------------|-------------------------------------------------------------------------------------------------------------------------------------------------------------------------------------------------------------------------------------------------------------------------------------------------------------------------------------------------------------------------------------------------------------------------------------------------------------------------------|
|   |                                                                                                                                                                                                                                                                                                                                               |                                                                                                                                                | <p>analysis for the Global Burden of Disease Study 2015. The Lancet Under review.</p> <p>20 GBD 2015 Diseases and Injury Incidence and Prevalence Collaborators. Global, regional, and national incidence, prevalence, and years lived with disability (YLDs) for 310 acute and chronic diseases and injuries, 1990-2015: a systematic analysis for the Global Burden of Disease Study 2015. The Lancet Under review.</p>                                                     |
| 4 | Specify the inclusion and exclusion criteria. Identify all ad-hoc exclusions.                                                                                                                                                                                                                                                                 | All inclusion and exclusion criteria by data type referenced in main text.                                                                     | <ol style="list-style-type: none"> <li>1. Main text (Methods)</li> <li>2. Main text from citation 12 (Methods, Nonfatal outcome estimation)</li> <li>3. Appendix from citation 12 (Parts 1-3)</li> <li>4. Main text from citation 20 (Methods)</li> <li>5. Appendix from citation 20 (Section 2. Nonfatal outcome estimation, Step 1. Data sources, identification and extraction; Section 3a-d. Cause-specific estimation process)</li> </ol> <p>See above for citations</p> |
| 5 | Provide information on all included data sources and their main characteristics. For each data source used, report reference information or contact name/institution, population represented, data collection method, year(s) of data collection, sex and age range, diagnostic criteria or measurement method, and sample size, as relevant. | Interactive, online data source tool that provides metadata for data sources by component, geography, cause, or impairment has been developed. | <p>Online data tools:</p> <p><a href="http://ghdx.healthdata.org/global-burden-disease-study-2015">http://ghdx.healthdata.org/global-burden-disease-study-2015</a></p>                                                                                                                                                                                                                                                                                                        |
| 6 | Identify and describe any categories of input data that have potentially important biases (e.g., based on characteristics listed in item 5).                                                                                                                                                                                                  | Summary of known biases by cause included in methodological appendices of referenced papers.                                                   | <ol style="list-style-type: none"> <li>1. Main text (Methods)</li> <li>2. Appendix from citation 12 (Parts 1-3)</li> </ol>                                                                                                                                                                                                                                                                                                                                                    |



|                                                                                                       |                                                                                                                                                                                                                                                                                                                                                                                         |                                                                                                                                                                                                 |                                                                                                                                                             |
|-------------------------------------------------------------------------------------------------------|-----------------------------------------------------------------------------------------------------------------------------------------------------------------------------------------------------------------------------------------------------------------------------------------------------------------------------------------------------------------------------------------|-------------------------------------------------------------------------------------------------------------------------------------------------------------------------------------------------|-------------------------------------------------------------------------------------------------------------------------------------------------------------|
|                                                                                                       |                                                                                                                                                                                                                                                                                                                                                                                         |                                                                                                                                                                                                 | 3. Appendix from citation 20 (Section 3a-d. Cause-specific estimation process)<br><br>See above for citations                                               |
| <i>For data inputs that contribute to the analysis but were not synthesized as part of the study:</i> |                                                                                                                                                                                                                                                                                                                                                                                         |                                                                                                                                                                                                 |                                                                                                                                                             |
| 7                                                                                                     | Describe and give sources for any other data inputs.                                                                                                                                                                                                                                                                                                                                    | Included in list of all data sources provided in submission materials for referenced papers as well as online data source tool.                                                                 | Online data tools:<br><a href="http://ghdx.healthdata.org/global-burden-disease-study-2015">http://ghdx.healthdata.org/global-burden-disease-study-2015</a> |
| <i>For all data inputs:</i>                                                                           |                                                                                                                                                                                                                                                                                                                                                                                         |                                                                                                                                                                                                 |                                                                                                                                                             |
| 8                                                                                                     | Provide all data inputs in a file format from which data can be efficiently extracted (e.g., a spreadsheet as opposed to a PDF), including all relevant meta-data listed in item 5. For any data inputs that cannot be shared due to ethical or legal reasons, such as third-party ownership, provide a contact name or the name of the institution that retains the right to the data. | Downloads of input data will be available through online tools, including data visualization tools and data query tools. Input data not available in tools will be made available upon request. | Online data tools:<br><a href="http://ghdx.healthdata.org/global-burden-disease-study-2015">http://ghdx.healthdata.org/global-burden-disease-study-2015</a> |
| <b>Data analysis</b>                                                                                  |                                                                                                                                                                                                                                                                                                                                                                                         |                                                                                                                                                                                                 |                                                                                                                                                             |
| 9                                                                                                     | Provide a conceptual overview of the data analysis method. A diagram may be helpful.                                                                                                                                                                                                                                                                                                    | Flow diagrams of the overall methodological processes as well as cause-specific modelling processes have been provided.                                                                         | Main text (Methods)                                                                                                                                         |
| 10                                                                                                    | Provide a detailed description of all steps of the analysis, including mathematical formulae. This description should cover, as relevant, data cleaning, data pre-processing, data adjustments and weighting of data sources, and mathematical or statistical model(s).                                                                                                                 | Methodological write-up for the calculation of DALYs and HALE have been provided.                                                                                                               | Main text (Methods)                                                                                                                                         |
| 11                                                                                                    | Describe how candidate models were evaluated and how the final model(s) were selected.                                                                                                                                                                                                                                                                                                  | Provided in the methodological write-ups within referenced appendix material.                                                                                                                   | 1. Main text (Methods)<br>2. Appendix from citation 12 (Parts 2-3)<br>3. Appendix from citation 20 (Section 3a-d. Cause-specific estimation process)        |

|                               |                                                                                                                                                                  |                                                                                                                                                                                                            |                                                                                                                                                                                                                                                   |
|-------------------------------|------------------------------------------------------------------------------------------------------------------------------------------------------------------|------------------------------------------------------------------------------------------------------------------------------------------------------------------------------------------------------------|---------------------------------------------------------------------------------------------------------------------------------------------------------------------------------------------------------------------------------------------------|
|                               |                                                                                                                                                                  |                                                                                                                                                                                                            | See above for citations                                                                                                                                                                                                                           |
| 12                            | Provide the results of an evaluation of model performance, if done, as well as the results of any relevant sensitivity analysis.                                 | Provided in the methodological write-ups within referenced appendix material.                                                                                                                              | <ol style="list-style-type: none"> <li>1. Main text (Methods)</li> <li>2. Appendix from citation 12 (Parts 2-3)</li> <li>3. Appendix from citation 20 (Section 3a-d. Cause-specific estimation process)</li> </ol> <p>See above for citations</p> |
| 13                            | Describe methods for calculating uncertainty of the estimates. State which sources of uncertainty were, and were not, accounted for in the uncertainty analysis. | Provided in the methodological write-ups within referenced appendix material.                                                                                                                              | <ol style="list-style-type: none"> <li>1. Main text (Methods)</li> <li>2. Appendix from citation 12 (Parts 2-3)</li> <li>3. Appendix from citation 20 (Section 3a-d. Cause-specific estimation process)</li> </ol> <p>See above for citations</p> |
| 14                            | State how analytic or statistical source code used to generate estimates can be accessed.                                                                        | Access statement provided.                                                                                                                                                                                 | Online data tools:<br><a href="http://ghdx.healthdata.org/global-burden-disease-study-2015">http://ghdx.healthdata.org/global-burden-disease-study-2015</a>                                                                                       |
| <b>Results and Discussion</b> |                                                                                                                                                                  |                                                                                                                                                                                                            |                                                                                                                                                                                                                                                   |
| 15                            | Provide published estimates in a file format from which data can be efficiently extracted.                                                                       | GBD 2015 results will be made available through online data visualization tools, the Global Health Data Exchange, and the online data query tool (these tools are already available for GBD 2013 results). | Main text, appendix results section, and online data tools:<br><a href="http://ghdx.healthdata.org/global-burden-disease-study-2015">http://ghdx.healthdata.org/global-burden-disease-study-2015</a>                                              |
| 16                            | Report a quantitative measure of the uncertainty of the estimates (e.g. uncertainty intervals).                                                                  | Uncertainty intervals are provided with all results.                                                                                                                                                       | Main text, appendix results section, and online data tools:<br><a href="http://ghdx.healthdata.org/global-burden-disease-study-2015">http://ghdx.healthdata.org/global-burden-disease-study-2015</a>                                              |

|    |                                                                                                                                                          |                                                                                                                                                          |                                                    |
|----|----------------------------------------------------------------------------------------------------------------------------------------------------------|----------------------------------------------------------------------------------------------------------------------------------------------------------|----------------------------------------------------|
| 17 | Interpret results in light of existing evidence. If updating a previous set of estimates, describe the reasons for changes in estimates.                 | Discussion of methodological changes between GBD rounds provided in the narrative of the papers and appendices of referenced papers.                     | Main text (Methods, Methods changes and data gaps) |
| 18 | Discuss limitations of the estimates. Include a discussion of any modelling assumptions or data limitations that affect interpretation of the estimates. | Discussion of limitations provided in the narrative of the main paper as well as in the methodological write-ups in the appendices of referenced papers. | Main text (Methods, Limitations)                   |

## Section 2. Supplementary Results











Appendix Table 2. Life expectancy at birth and HALE at birth and at age 65 by location for GBD years 1990–2015, both sexes combined.

| Location                   | 1990                   |                        |                        | 2000                   |                        |                       | 2005                   |                        |                        | 2010                   |                        |                        | 2015                   |                        |                        |
|----------------------------|------------------------|------------------------|------------------------|------------------------|------------------------|-----------------------|------------------------|------------------------|------------------------|------------------------|------------------------|------------------------|------------------------|------------------------|------------------------|
|                            | Life expectancy        |                        | HALE                   | Life expectancy        |                        | HALE                  | Life expectancy        |                        | HALE                   | Life expectancy        |                        | HALE                   | Life expectancy        |                        | HALE                   |
|                            | At birth               | At birth               | At age 65              | At birth               | At birth               | At age 65             | At birth               | At birth               | At age 65              | At birth               | At birth               | At age 65              | At birth               | At birth               | At age 65              |
| Western Sub-Saharan Africa | 54.19<br>(52.3-55.85)  | 9.8<br>(43.9-49.04)    | 8.66<br>(8.66-10.93)   | 54.96<br>(54.01-55.94) | 47.39<br>(44.95-49.57) | 8.89<br>(8.87-10.15)  | 56.65<br>(55.6-57.65)  | 48.89<br>(46.43-51.12) | 10.13<br>(9.06-11.1)   | 60.02<br>(58.8-61.31)  | 51.87<br>(49.26-54.36) | 10.46<br>(9.52-11.74)  | 62.53<br>(60.39-64.22) | 54.18<br>(51.26-59.4)  | 10.92<br>(9.69-12.01)  |
| Benin                      | 56.09<br>(54.4-57.85)  | 10.15<br>(45.49-50.89) | 10.15<br>(9.04-11.22)  | 57.2<br>(54.93-59.43)  | 9.92<br>(46.71-52.43)  | 9.92<br>(8.69-11.09)  | 58.59<br>(55.4-62.04)  | 51.05<br>(47.46-54.37) | 9.97<br>(8.43-11.42)   | 60.77<br>(55.42-65.78) | 53.15<br>(48.26-57.77) | 10.0<br>(8.07-11.99)   | 62.32<br>(59.9-68.92)  | 54.76<br>(49.23-60.26) | 10.4<br>(8.01-12.45)   |
| Burkina Faso               | 51.42<br>(49.62-53.22) | 44.29<br>(41.75-46.81) | 9.3<br>(8.15-10.46)    | 52.56<br>(50.61-54.42) | 9.56<br>(42.96-47.95)  | 9.3<br>(8.41-10.65)   | 55.5<br>(53.5-58.01)   | 48.55<br>(45.5-51.21)  | 10.06<br>(8.77-11.24)  | 59.0<br>(55.57-62.74)  | 51.71<br>(48.18-55.29) | 9.0<br>(8.71-11.97)    | 60.94<br>(55.66-66.19) | 53.63<br>(48.76-58.46) | 10.43<br>(8.28-12.59)  |
| Cameroon                   | 58.35<br>(56.72-60.06) | 9.9<br>(47.33-52.76)   | 9.25<br>(10.55-12.55)  | 54.25<br>(52.45-56.4)  | 8.65<br>(44.28-49.59)  | 9.25<br>(8.03-10.59)  | 56.95<br>(52.45-57.48) | 47.51<br>(44.6-50.22)  | 9.37<br>(8.03-10.72)   | 57.81<br>(54.47-61.72) | 50.2<br>(46.84-53.9)   | 9.93<br>(8.36-11.67)   | 59.35<br>(55.64-64.5)  | 51.97<br>(47.03-56.51) | 10.21<br>(8.1-12.38)   |
| Cape Verde                 | 68.66<br>(68.16-69.14) | 59.73<br>(57.11-62.1)  | 11.59<br>(10.55-12.55) | 68.44<br>(65.18-71.68) | 59.73<br>(56.11-63.33) | 11.37<br>(9.88-12.89) | 69.3<br>(66.5-72.21)   | 60.55<br>(57.29-63.76) | 11.57<br>(10.25-12.92) | 71.06<br>(70.33-71.8)  | 62.1<br>(59.38-64.54)  | 11.96<br>(10.82-12.94) | 72.9<br>(70.88-72.9)   | 63.4<br>(60.62-66.5)   | 11.59<br>(12.2-13.9)   |
| Chad                       | 53.67<br>(51.86-55.46) | 46.13<br>(43.4-48.61)  | 10.0<br>(8.9-11.11)    | 51.5<br>(49.23-54.05)  | 44.54<br>(41.81-47.38) | 9.17<br>(7.95-10.46)  | 52.99<br>(49.04-56.79) | 45.83<br>(41.94-49.49) | 9.43<br>(7.6-11.04)    | 59.21<br>(50.46-61.4)  | 55.75<br>(43.39-53.57) | 9.73<br>(7.6-11.96)    | 62.39<br>(51.25-62.62) | 49.88<br>(44.28-55.68) | 9.33<br>(7.58-12.36)   |
| Cote d'Ivoire              | 55.28<br>(53.31-57.19) | 47.38<br>(44.64-50.12) | 9.02<br>(7.87-10.25)   | 52.05<br>(50.0-54.22)  | 45.15<br>(42.53-47.74) | 9.64<br>(7.35-9.91)   | 53.27<br>(51.13-55.7)  | 46.43<br>(43.8-48.88)  | 9.06<br>(7.83-10.25)   | 56.64<br>(53.26-60.02) | 49.29<br>(45.77-52.68) | 9.56<br>(7.97-11.16)   | 59.14<br>(54.11-64.28) | 51.67<br>(47.0-56.23)  | 9.77<br>(7.82-11.77)   |
| The Gambia                 | 57.3<br>(55.7-66.43)   | 10.51<br>(48.9-58.4)   | 10.51<br>(8.39-12.6)   | 63.65<br>(61.31-66.14) | 64.93<br>(52.77-58.61) | 10.58<br>(9.34-11.89) | 66.93<br>(62.92-67.13) | 58.31<br>(53.99-59.72) | 10.81<br>(9.62-12.03)  | 66.53<br>(64.18-68.98) | 58.21<br>(55.1-61.28)  | 11.1<br>(9.81-12.48)   | 66.53<br>(64.24-71.66) | 59.63<br>(55.76-63.3)  | 11.34<br>(9.68-12.96)  |
| Ghana                      | 58.04<br>(54.14-61.87) | 10.59<br>(46.87-54.15) | 10.59<br>(7.94-11.0)   | 60.04<br>(57.37-62.56) | 9.44<br>(49.44-55.65)  | 10.59<br>(8.68-11.47) | 62.52<br>(57.63-63.99) | 53.32<br>(49.94-56.96) | 10.22<br>(8.76-11.82)  | 62.92<br>(57.87-67.86) | 55.3<br>(50.96-60.0)   | 10.54<br>(8.66-12.66)  | 63.3<br>(59.47-69.99)  | 53.6<br>(52.25-62.62)  | 10.85<br>(8.71-13.04)  |
| Guinea                     | 51.87<br>(50.43-53.63) | 9.21<br>(42.42-47.36)  | 9.21<br>(8.82-11.03)   | 54.22<br>(52.67-56.0)  | 47.1<br>(44.38-49.48)  | 9.6<br>(8.52-10.69)   | 56.01<br>(54.04-58.12) | 46.43<br>(45.98-51.28) | 9.81<br>(8.65-10.95)   | 57.91<br>(53.5-60.71)  | 50.46<br>(47.45-53.55) | 9.86<br>(8.56-11.17)   | 59.13<br>(55.6-61.72)  | 51.73<br>(47.38-56.07) | 9.85<br>(8.05-11.72)   |
| Guinea-Bissau              | 51.47<br>(41.4-60.34)  | 55.66<br>(36.52-52.6)  | 6.12<br>(6.14-12.9)    | 52.75<br>(41.92-62.6)  | 46.98<br>(37.0-54.69)  | 9.63<br>(6.02-13.2)   | 52.88<br>(41.72-63.29) | 47.28<br>(36.94-55.21) | 9.64<br>(5.85-13.25)   | 54.27<br>(42.6-64.65)  | 48.58<br>(37.57-56.56) | 9.76<br>(5.82-13.29)   | 55.65<br>(42.14-65.78) | 49.78<br>(37.62-57.62) | 9.33<br>(5.76-13.3)    |
| Liberia                    | 48.55<br>(45.25-52.12) | 40.96<br>(37.56-44.35) | 9.1<br>(7.67-10.52)    | 49.71<br>(53.85-57.81) | 36.32<br>(44.27-49.97) | 8.41<br>(8.45-11.0)   | 50.88<br>(46.39-52.26) | 47.16<br>(46.92-52.26) | 9.51<br>(8.15-10.81)   | 51.83<br>(58.33-63.55) | 44.2<br>(48.47-55.16)  | 9.6<br>(8.27-11.07)    | 51.83<br>(58.92-67.21) | 44.2<br>(58.92-67.21)  | 10.05<br>(8.32-11.9)   |
| Mali                       | 50.01<br>(48.67-51.43) | 43.06<br>(40.68-45.34) | 9.02<br>(7.97-10.07)   | 53.48<br>(51.93-55.04) | 46.07<br>(43.52-48.39) | 9.79<br>(8.63-10.93)  | 56.87<br>(54.85-58.75) | 48.96<br>(46.02-51.65) | 10.43<br>(9.09-11.64)  | 59.21<br>(56.67-61.87) | 51.28<br>(48.19-54.08) | 10.76<br>(9.41-12.03)  | 60.19<br>(55.95-64.37) | 52.43<br>(48.27-56.38) | 10.7<br>(8.86-12.5)    |
| Mauritania                 | 59.47<br>(57.8-61.29)  | 51.11<br>(48.27-53.76) | 9.29<br>(8.18-10.38)   | 60.32<br>(62.03-65.67) | 54.91<br>(51.88-57.63) | 11.25<br>(9.17-11.62) | 66.32<br>(64.18-68.43) | 57.06<br>(53.84-60.06) | 11.25<br>(9.87-12.58)  | 68.6<br>(65.51-71.51)  | 59.15<br>(55.52-62.45) | 11.69<br>(10.08-13.17) | 69.75<br>(65.47-74.08) | 60.26<br>(55.92-64.36) | 11.76<br>(9.88-13.68)  |
| Niger                      | 47.15<br>(45.6-48.8)   | 41.07<br>(38.8-43.14)  | 8.44<br>(8.8-10.85)    | 45.52<br>(50.76-54.01) | 36.32<br>(43.28-47.86) | 8.44<br>(9.12-11.16)  | 48.59<br>(54.16-57.85) | 45.66<br>(46.21-51.4)  | 10.19<br>(9.27-11.41)  | 51.8<br>(56.48-61.84)  | 48.8<br>(48.8-54.73)   | 10.19<br>(9.25-11.85)  | 51.78<br>(56.43-65.4)  | 48.52<br>(49.41-57.87) | 9.33<br>(8.76-12.28)   |
| Nigeria                    | 54.14<br>(50.33-57.7)  | 43.87<br>(42.81-49.09) | 9.23<br>(8.28-11.65)   | 55.2<br>(53.32-57.12)  | 47.29<br>(44.49-49.84) | 9.6<br>(9.06-11.51)   | 56.78<br>(54.61-58.86) | 48.64<br>(45.95-51.32) | 10.52<br>(9.31-11.78)  | 52.39<br>(58.64-65.59) | 46.59<br>(60.04-67.61) | 11.46<br>(9.97-12.97)  | 54.59<br>(53.29-59.05) | 50.32<br>(60.04-67.61) | 9.85<br>(10.65-13.57)  |
| Sao Tome and Principe      | 63.44<br>(61.83-64.94) | 55.26<br>(52.53-57.8)  | 11.02<br>(9.88-12.05)  | 64.63<br>(62.75-66.64) | 56.38<br>(53.5-59.1)   | 10.41<br>(9.29-11.55) | 65.47<br>(63.03-67.85) | 57.14<br>(53.94-60.19) | 10.28<br>(9.12-11.52)  | 66.93<br>(62.92-70.66) | 58.41<br>(54.34-62.39) | 10.46<br>(8.85-12.13)  | 68.0<br>(62.7-73.1)    | 59.38<br>(54.25-64.31) | 10.67<br>(10.69-12.67) |
| Senegal                    | 57.76<br>(55.98-59.67) | 50.46<br>(47.87-53.03) | 10.08<br>(8.99-11.15)  | 59.72<br>(57.52-61.74) | 52.14<br>(49.33-54.79) | 10.08<br>(8.92-11.24) | 62.18<br>(58.84-65.55) | 50.73<br>(50.78-57.6)  | 10.32<br>(8.85-11.83)  | 64.16<br>(58.87-69.38) | 56.25<br>(51.43-60.99) | 10.42<br>(8.46-12.36)  | 65.37<br>(58.95-71.32) | 57.49<br>(51.62-62.71) | 10.49<br>(8.25-12.69)  |
| Sierra Leone               | 51.62<br>(47.97-55.18) | 44.37<br>(40.74-47.82) | 10.22<br>(8.67-11.78)  | 51.48<br>(49.6-53.3)   | 44.22<br>(41.5-46.67)  | 9.3<br>(8.2-10.41)    | 52.28<br>(50.74-53.92) | 45.12<br>(42.49-47.5)  | 8.85<br>(7.82-9.88)    | 54.96<br>(44.98-50.59) | 47.9<br>(46.06-53.34)  | 11.46<br>(7.89-10.38)  | 53.45<br>(52.84-61.38) | 50.11<br>(46.06-53.79) | 9.56<br>(7.85-11.26)   |
| Togo                       | 57.76<br>(55.89-59.97) | 50.38<br>(47.74-52.85) | 10.02<br>(8.93-11.1)   | 56.71<br>(54.4-59.3)   | 49.8<br>(46.58-52.38)  | 9.71<br>(8.43-10.98)  | 58.8<br>(54.34-59.48)  | 49.42<br>(46.66-52.46) | 9.82<br>(8.46-11.1)    | 58.66<br>(55.63-61.83) | 51.41<br>(48.33-54.63) | 9.99<br>(8.64-11.4)    | 61.48<br>(57.09-66.17) | 54.09<br>(49.88-58.28) | 10.34<br>(8.47-12.18)  |
| Eastern Sub-Saharan Africa | 50.86<br>(49.8-51.82)  | 44.21<br>(41.9-46.24)  | 8.44<br>(7.55-9.29)    | 47.1<br>(46.74-52.57)  | 34.9<br>(42.84-46.93)  | 8.74<br>(8.77-9.26)   | 53.1<br>(54.23-56.29)  | 48.03<br>(45.67-50.13) | 9.37<br>(8.35-10.18)   | 59.77<br>(58.23-61.23) | 51.96<br>(49.19-54.43) | 9.93<br>(8.38-10.98)   | 62.4<br>(60.34-64.31)  | 54.5<br>(51.51-57.26)  | 10.34<br>(9.02-11.36)  |
| Burundi                    | 45.59<br>(44.45-51.49) | 40.43<br>(39.63-44.9)  | 6.82<br>(5.79-8.45)    | 46.74<br>(44.44-49.01) | 37.25<br>(38.82-43.69) | 7.25<br>(6.23-8.26)   | 54.68<br>(52.42-57.04) | 48.08<br>(45.19-50.88) | 8.75<br>(7.66-9.87)    | 60.44<br>(56.83-64.19) | 53.41<br>(49.91-56.78) | 9.83<br>(8.43-11.3)    | 64.65<br>(61.82-68.41) | 54.65<br>(49.67-59.42) | 9.92<br>(7.96-11.94)   |
| Comoros                    | 57.1<br>(51.92-63.09)  | 49.94<br>(45.27-54.7)  | 9.0<br>(7.22-10.93)    | 62.14<br>(59.7-64.46)  | 54.16<br>(51.22-56.98) | 9.7<br>(8.54-10.83)   | 65.99<br>(63.61-68.39) | 57.51<br>(54.53-60.43) | 10.87<br>(9.52-11.93)  | 67.71<br>(65.0-70.35)  | 59.19<br>(55.97-62.31) | 11.01<br>(9.69-12.26)  | 68.07<br>(65.92-72.43) | 59.65<br>(55.3-63.72)  | 10.92<br>(9.26-12.68)  |
| Djibouti                   | 60.99<br>(56.24-65.79) | 53.22<br>(48.66-57.4)  | 10.38<br>(8.49-12.1)   | 59.97<br>(52.75-67.2)  | 52.43<br>(45.89-58.14) | 10.12<br>(7.79-12.48) | 60.72<br>(53.75-67.54) | 53.03<br>(46.54-58.76) | 10.15<br>(7.64-12.58)  | 62.35<br>(48.08-69.29) | 54.41<br>(48.08-60.35) | 10.26<br>(7.76-12.73)  | 67.77<br>(61.50-71.51) | 55.61<br>(49.15-61.09) | 10.33<br>(7.94-12.62)  |
| Eritrea                    | 52.43<br>(50.36-54.64) | 45.69<br>(42.81-48.33) | 7.85<br>(6.82-8.87)    | 50.61<br>(49.6-53.3)   | 37.65<br>(39.05-45.05) | 8.31<br>(7.11-11.57)  | 59.94<br>(53.43-66.97) | 52.19<br>(46.63-57.77) | 9.2<br>(7.11-11.57)    | 60.13<br>(52.66-67.59) | 52.55<br>(46.21-58.73) | 9.07<br>(6.84-11.52)   | 60.74<br>(52.84-68.72) | 53.28<br>(46.14-59.27) | 9.11<br>(6.73-11.52)   |
| Ethiopia                   | 47.25<br>(43.27-47.14) | 44.51<br>(37.47-41.96) | 9.4<br>(6.42-8.11)     | 50.38<br>(50.28-53.86) | 39.76<br>(43.49-47.97) | 45.7<br>(7.54-9.43)   | 52.05<br>(54.36-57.93) | 48.6<br>(46.85-51.61)  | 9.82<br>(8.18-10.22)   | 58.66<br>(58.83-65.78) | 51.41<br>(51.12-57.95) | 9.99<br>(8.78-11.83)   | 61.48<br>(60.04-70.12) | 54.09<br>(52.59-61.81) | 10.34<br>(8.74-12.56)  |
| Kenya                      | 61.84<br>(60.44-63.08) | 53.45<br>(50.51-55.89) | 10.22<br>(9.09-11.15)  | 55.6<br>(54.36-56.81)  | 47.23<br>(45.14-50.2)  | 10.22<br>(8.86-11.13) | 56.05<br>(56.05-58.38) | 49.22<br>(46.34-51.6)  | 10.36<br>(9.15-11.46)  | 54.0<br>(61.58-64.14)  | 51.96<br>(50.71-56.7)  | 10.34<br>(9.54-11.94)  | 62.4<br>(63.55-66.53)  | 54.5<br>(53.1-59.08)   | 10.34<br>(9.75-12.24)  |
| Madagascar                 | 55.95<br>(54.64-57.29) | 48.1<br>(45.52-50.44)  | 8.93<br>(7.93-9.91)    | 50.9<br>(57.47-60.67)  | 38.1<br>(48.16-53.35)  | 9.08<br>(8.07-10.0)   | 59.15<br>(58.88-63.48) | 51.22<br>(49.65-55.55) | 9.2<br>(8.05-10.24)    | 62.44<br>(58.47-66.51) | 54.1<br>(50.37-57.96)  | 9.51<br>(8.06-10.98)   | 64.36<br>(57.95-69.31) | 55.41<br>(50.71-60.58) | 9.72<br>(7.91-11.66)   |
| Malawi                     | 48.83<br>(46.69-50.4)  | 42.25<br>(39.6-44.56)  | 9.24<br>(8.0-10.49)    | 45.41<br>(42.74-48.27) | 39.38<br>(36.78-42.0)  | 8.56<br>(7.61-10.71)  | 48.51<br>(45.99-51.24) | 42.09<br>(39.44-44.79) | 9.15<br>(7.62-10.15)   | 55.37<br>(52.72-58.16) | 48.12<br>(45.27-51.06) | 10.16<br>(8.64-11.7)   | 60.51<br>(56.54-64.88) | 53.0<br>(48.6-57.02)   | 10.83<br>(8.84-12.84)  |
| Mozambique                 | 51.46<br>(49.75-53.02) | 44.11<br>(41.47-46.52) | 9.29<br>(8.1-10.31)    | 52.33<br>(50.23-54.47) | 44.92<br>(42.17-47.57) | 9.01<br>(7.71-10.33)  | 52.89<br>(50.05-56.1)  | 45.31<br>(42.21-48.44) | 9.23<br>(7.64-10.76)   | 54.38<br>(51.05-58.46) | 46.68<br>(43.26-50.18) | 9.12<br>(7.52-10.84)   | 57.11<br>(51.85-62.72) | 49.56<br>(44.86-54.18) | 9.54<br>(7.54-11.71)   |
| Rwanda                     | 50.55<br>(48.49-52.73) | 44.51<br>(42.07-46.84) | 8.16<br>(7.16-9.12)    | 49.23<br>(47.52-51.0)  | 42.72<br>(40.36-45.06) | 8.17<br>(7.2-9.2)     | 51.53<br>(57.38-61.81) | 46.53<br>(48.51-54.45) | 10.61<br>(9.26-11.96)  | 60.09<br>(61.82-68.41) | 56.69<br>(53.06-60.41) | 11.24<br>(9.66-12.84)  | 61.24<br>(60.27-60.55) | 57.61<br>(52.77-62.15) | 10.16<br>(9.17-13.15)  |
| Somalia                    | 48.83<br>(38.93-60.25) | 43.17<br>(34.3-51.25)  | 8.28<br>(5.45-11.86)   | 44.01<br>(40.75-63.25) | 32.8<br>(35.58-53.85)  | 8.19<br>(5.47-11.83)  | 52.06<br>(54.71-11.83) | 46.07<br>(35.97-55.25) | 8.24<br>(5.37-11.97)   | 56.81<br>(40.45-63.5)  | 45.62<br>(35.38-54.28) | 8.16<br>(5.29-11.49)   | 54.17<br>(42.06-65.97) | 47.84<br>(37.26-64.3)  | 8.37<br>(5.43-11.76)   |
| South Sudan                | 50.88<br>(40.95-60.7)  | 44.01<br>(35.67-51.36) | 8.56<br>(5.47-11.79)   | 41.01<br>(43.24-64.81) | 34.9<br>(36.92-55.3)   | 8.48<br>(5.46-12.01)  | 47.15<br>(43.09-65.96) | 48.15<br>(37.86-56.3)  | 8.55<br>(5.59-12.26)   | 59.99<br>(42.86-66.45) | 49.04<br>(37.78-56.75) | 9.04<br>(5.49-12.45)   | 56.14<br>(43.56-66.74) | 49.19<br>(38.22-57.16) | 9.06<br>(5.55-12.57)   |
| Tanzania                   | 55.23<br>(53.5-57.1)   | 47.8<br>(45.22-50.33)  | 9.6<br>(8.46-10.72)    | 54.29<br>(52.0-56.71)  | 47.                    |                       |                        |                        |                        |                        |                        |                        |                        |                        |                        |

**Appendix Table 3. DALYs for all causes and level 1 cause groups by location for 1990 - 2015, both sexes combined.**

|                           | Cause      | 1990                                                             | 1995                                                             | 2000                                                             | 2005                                                             | 2010                                                             | 2015                                                             |
|---------------------------|------------|------------------------------------------------------------------|------------------------------------------------------------------|------------------------------------------------------------------|------------------------------------------------------------------|------------------------------------------------------------------|------------------------------------------------------------------|
| Global                    | All causes | 256,127,151,822,720<br>(241,872,302,073,120-272,432,975,821,480) | 257,393,914,617,610<br>(241,650,359,790,680-275,147,067,613,690) | 257,393,914,383,320<br>(240,870,372,829,980-276,372,859,979,900) | 255,330,675,738,610<br>(237,313,761,874,420-275,632,803,804,820) | 249,271,795,250,780<br>(229,837,871,214,860-270,300,259,830,960) | 246,489,538,665,230<br>(225,988,877,725,520-269,651,075,114,390) |
| Global                    | Group I    | 119,624,949,926,150<br>(115,220,287,238,450-124,616,933,253,040) | 111,663,597,764,660<br>(107,663,753,381,660-116,310,546,741,090) | 104,912,535,812,850<br>(100,987,383,793,800-109,419,264,303,590) | 96,801,454,581,615<br>(93,180,949,921,269-101,232,791,236,720)   | 90,801,454,581,615<br>(81,504,146,843,898-89,897,425,338,177)    | 74,159,590,972,266<br>(70,392,871,460,406-78,765,966,756,643)    |
| Global                    | NCD        | 125,466,573,910<br>(98,157,176,438,389-120,816,603,781,800)      | 118,106,691,699,470<br>(105,935,576,435,710-130,634,381,991,590) | 125,456,737,768,840<br>(112,576,448,278,950-139,290,464,929,590) | 132,220,794,473,300<br>(118,117,974,614,640-147,144,882,737,280) | 138,048,582,817,900<br>(122,660,899,067,380-154,390,872,326,310) | 147,350,822,496,590<br>(130,980,319,206,280-165,014,744,539,370) |
| Global                    | Injuries   | 27,225,795,322,662<br>(25,215,306,105,564-28,926,645,196,850)    | 27,615,883,050,491<br>(25,481,054,819,787-29,418,740,525,310)    | 27,620,640,816,230<br>(25,196,696,388,347-28,617,641,123,887)    | 26,308,426,684,270<br>(24,556,647,153,295-27,862,150,863,530)    | 26,024,514,250,028<br>(24,007,986,666,328-27,888,894,961,309)    | 24,979,125,196,369<br>(23,140,916,281,771-26,641,923,381,308)    |
| High SDI                  | All causes | 34,701,825,275,533<br>(29,439,729,905,067-36,248,797,927,826)    | 34,793,622,852,159<br>(31,552,738,317,182-38,704,474,550,201)    | 34,701,825,275,533<br>(31,245,045,344,067-38,698,237,688,073)    | 35,108,603,205,069<br>(31,517,372,372,129-39,263,470,681,246)    | 34,257,000,500,169<br>(30,455,146,820,798-38,596,638,389,028)    | 35,513,523,727,965<br>(31,403,226,026,818-40,079,398,227,469)    |
| High SDI                  | Group I    | 2,602,918,922,224<br>(2,346,492,832,489-2,922,046,247,530)       | 2,583,240,394,325<br>(2,324,841,040,452-2,894,685,531,155)       | 2,583,240,394,325<br>(2,081,200,120,976-2,649,686,195,716)       | 2,258,068,618,493<br>(2,001,318,304,761-2,584,059,253,016)       | 2,130,192,652,766<br>(1,873,668,457,923-2,474,420,057,421)       | 2,094,423,918,516<br>(1,836,538,406,130-2,449,158,297,822)       |
| High SDI                  | NCD        | 25,890,766,287,570<br>(23,272,011,816,430-28,855,396,116,943)    | 27,697,053,034,198<br>(25,233,896,246,849-30,804,922,011,277)    | 28,044,093,992,676<br>(25,139,737,553,345-31,299,235,772,880)    | 28,632,470,468,454<br>(25,591,132,716,026-32,076,703,022,151)    | 28,515,999,953,420<br>(25,268,393,682,814-32,169,520,255,373)    | 29,959,560,422,880<br>(26,419,826,319,340-33,873,544,806,569)    |
| High SDI                  | Injuries   | 4,148,140,065,093<br>(3,863,452,243,889-4,487,143,685,281)       | 4,613,329,423,636<br>(4,308,843,750,097-4,977,324,786,136)       | 4,322,235,035,830<br>(4,023,462,365,180-4,627,677,741,904)       | 4,218,064,118,120<br>(3,908,185,485,904-4,582,947,986,579)       | 3,610,807,894,072<br>(3,320,313,146,995-3,975,001,709,178)       | 3,459,538,566,560<br>(3,149,182,378,651-3,848,902,158,952)       |
| High-middle SDI           | All causes | 44,917,765,278,805<br>(41,604,978,407,209-48,693,476,356,465)    | 45,363,658,108,448<br>(41,651,617,488,581-49,343,229,739,288)    | 45,767,599,072,311<br>(41,857,247,115,141-50,306,676,974,200)    | 46,961,958,536,259<br>(42,584,630,951,951-51,695,950,115,236)    | 46,645,697,850,046<br>(42,135,299,087,101-51,725,663,812,886)    | 46,535,130,813,187<br>(41,693,470,986,956-52,105,242,568,572)    |
| High-middle SDI           | Group I    | 12,109,514,020,702<br>(11,460,459,073,423-12,897,880,887,267)    | 10,142,949,567,372<br>(9,511,548,914,636-10,859,281,758,323)     | 9,178,721,453,048<br>(8,584,143,394,838-9,880,273,978,528)       | 8,800,104,790,792<br>(8,238,779,326,452-9,511,305,176,876)       | 7,962,396,450,335<br>(7,349,588,665,642-8,705,672,390,354)       | 6,472,514,464,338<br>(5,875,802,354,487-7,190,160,750,445)       |
| High-middle SDI           | NCD        | 26,294,345,095,185<br>(23,610,105,623,552-29,248,035,601,882)    | 28,682,479,345,016<br>(25,761,140,683,419-31,879,720,068,015)    | 30,516,212,951,644<br>(27,325,419,537,530-34,116,928,302,391)    | 32,179,236,616,018<br>(28,706,837,319,488-36,016,461,670,980)    | 33,209,221,558,776<br>(29,327,974,145,935-37,401,781,907,184)    | 34,939,363,130,139<br>(30,844,678,623,383-39,623,272,814,132)    |
| High-middle SDI           | Injuries   | 6,514,106,162,917<br>(6,116,408,224,163-6,896,568,529,304)       | 6,538,229,196,060<br>(6,199,015,658,742-6,859,510,568,492)       | 6,172,664,667,620<br>(5,882,455,944,428-6,474,533,313,820)       | 5,882,617,119,449<br>(5,587,455,983,200-6,191,785,867,145)       | 5,474,079,840,935<br>(5,171,834,580,672-5,797,252,042,650)       | 5,123,252,218,711<br>(4,774,247,456,764-5,493,945,731,455)       |
| Middle SDI                | All causes | 67,829,537,842,725<br>(63,906,906,673,071-72,409,512,240,138)    | 64,086,431,114,473<br>(59,786,978,707,053-68,903,407,239,563)    | 61,892,934,426,038<br>(57,505,417,988,045-66,926,188,690,438)    | 61,001,177,882,041<br>(56,118,756,738,577-66,431,114,455,880)    | 60,061,406,731,658<br>(54,897,343,240,695-65,837,582,626,479)    | 60,100,383,907,796<br>(54,670,295,817,247-66,139,683,356,005)    |
| Middle SDI                | Group I    | 28,997,640,839,514<br>(27,670,348,858,254-30,482,111,045,828)    | 23,769,245,575,201<br>(22,594,500,956,146-25,106,003,848,122)    | 19,849,743,960,141<br>(18,776,990,716,985-21,099,805,756,101)    | 17,051,524,809,399<br>(16,067,304,234,133-18,169,878,459,512)    | 14,690,221,501,690<br>(13,796,448,709,677-15,755,024,607,818)    | 12,524,489,071,625<br>(11,631,475,751,103-13,770,849,105,847)    |
| Middle SDI                | NCD        | 30,442,740,079,397<br>(27,623,895,037,625-33,800,431,709,796)    | 32,380,869,692,444<br>(29,130,260,402,832-35,847,706,675,211)    | 34,548,061,339,674<br>(31,171,330,209,526-38,277,347,576,363)    | 36,770,140,079,937<br>(32,948,204,751,363-40,818,286,070,378)    | 38,547,309,669,696<br>(34,363,343,102,457-43,049,888,045,560)    | 40,655,109,105,275<br>(36,223,480,356,454-45,425,567,671,610)    |
| Middle SDI                | Injuries   | 8,189,156,932,813<br>(7,418,786,963,743-8,711,769,749,730)       | 7,936,317,846,829<br>(7,176,843,267,088-8,403,436,662,052)       | 7,495,129,127,223<br>(6,947,543,723,099-7,866,332,589,084)       | 7,199,512,992,704<br>(6,653,159,572,800-7,565,399,814,907)       | 6,823,785,560,272<br>(6,250,626,903,331-7,188,271,332,137)       | 6,920,785,731,458<br>(6,290,523,019,148-7,449,172,452,867)       |
| Low-middle SDI            | All causes | 81,719,949,690,686<br>(78,368,323,668,930-85,520,164,946,857)    | 81,539,095,087,761<br>(77,878,644,293,995-85,684,797,855,658)    | 81,674,247,576,411<br>(77,606,658,645,507-86,132,137,015,765)    | 80,807,363,253,606<br>(75,715,277,404,968-84,865,434,296,539)    | 77,140,818,602,803<br>(72,306,758,823,041-82,290,159,501,082)    | 73,528,319,823,518<br>(68,309,372,456,251-79,399,036,887,869)    |
| Low-middle SDI            | Group I    | 54,235,653,852,188<br>(52,477,034,113,486-56,086,224,718,477)    | 51,485,024,594,253<br>(49,775,304,204,155-53,322,435,718,708)    | 49,131,056,244,963<br>(47,419,808,535,707-50,946,021,248,476)    | 45,565,753,129,129<br>(43,973,652,815,036-47,417,300,911,968)    | 43,429,691,973,208<br>(39,819,406,881,088-41,328,995,297,309)    | 43,065,669,730,238<br>(32,374,363,103,001-58,943,979,415,562)    |
| Low-middle SDI            | NCD        | 21,261,930,545,820<br>(19,018,552,671,901-23,668,631,152,654)    | 25,967,897,609,944<br>(21,088,884,528,457-26,047,828,059,898)    | 23,567,755,588,689<br>(21,088,884,528,457-26,047,828,059,898)    | 27,650,091,973,208<br>(24,594,856,213,046-30,633,005,639,378)    | 29,941,966,116,315<br>(26,643,910,321,851-33,408,557,878,404)    | 32,712,926,177,107<br>(29,110,564,824,757-36,436,680,933,612)    |
| Low-middle SDI            | Injuries   | 6,212,365,292,678<br>(5,494,785,613,482-6,857,586,470,606)       | 4,886,312,934,819<br>(5,669,945,107,493-7,111,847,331,341)       | 6,575,294,261,935<br>(5,715,991,733,939-7,184,241,290,172)       | 7,199,512,992,704<br>(6,691,993,870,591-7,435,195,826,506)       | 7,788,578,357,533<br>(6,533,296,208,683-9,038,713,115,304)       | 6,749,723,916,172<br>(5,996,114,864,366-7,254,478,723,598)       |
| Low SDI                   | All causes | 28,878,328,680,145<br>(27,876,976,173,366-29,916,679,188,427)    | 31,358,134,967,395<br>(30,212,017,462,326-32,556,688,686,677)    | 33,108,352,593,534<br>(31,819,279,716,985-34,407,346,088,827)    | 32,115,333,165,513<br>(30,809,496,154,302-33,675,824,539,530)    | 30,962,479,454,928<br>(29,390,266,491,215-32,872,657,763,151)    | 30,647,543,896,158<br>(28,654,131,447,024-32,912,226,394,709)    |
| Low SDI                   | Group I    | 21,615,177,503,949<br>(20,743,097,257,167-22,405,083,149,872)    | 23,631,523,941,136<br>(22,721,323,252,778-24,571,991,708,700)    | 24,367,906,078,105<br>(23,459,886,429,801-25,428,406,561,277)    | 23,098,339,644,664<br>(22,246,641,697,242-24,137,394,091,030)    | 20,965,046,368,825<br>(20,107,129,352,418-22,007,045,264,596)    | 18,967,285,555,827<br>(17,961,420,518,983-20,218,574,879,541)    |
| Low SDI                   | NCD        | 51,166,290,221,675<br>(44,866,560,905,551-55,856,820,870,511)    | 57,801,869,149,524<br>(50,112,247,125,828-64,744,163,091,437)    | 6,296,380,319,816<br>(5,532,696,613,166-7,078,961,634,971)       | 6,895,888,959,472<br>(6,073,702,682,888-7,738,170,021,466)       | 7,330,649,247,234<br>(6,829,901,566,665-7,809,851,664,565)       | 7,970,331,114,315<br>(7,898,657,940,410-10,197,579,719,468)      |
| Low SDI                   | Injuries   | 2,146,860,954,520<br>(1,728,347,333,070-2,483,299,300,845)       | 2,024,741,876,735<br>(1,654,641,393,477-2,317,992,018,241)       | 2,444,066,196,513<br>(2,059,137,725,800-2,791,840,862,984)       | 2,121,415,561,378<br>(1,876,953,128,607-2,358,359,877,921)       | 2,266,783,818,869<br>(2,027,353,814,771-2,480,543,285,378)       | 2,709,927,226,016<br>(2,401,513,141,771-3,007,233,326,621)       |
| High-income               | All causes | 25,034,546,235,796<br>(22,453,705,484,402-27,974,955,263,988)    | 25,481,439,129,768<br>(22,769,535,843,699-28,600,041,955,403)    | 25,400,343,421,426<br>(22,645,749,506,426-28,736,742,173,698)    | 25,680,230,571,545<br>(22,712,913,553,169-29,115,807,892,234)    | 26,043,356,282,846<br>(22,934,722,020,933-29,640,407,027,825)    | 27,367,973,807,885<br>(24,021,193,308,112-31,189,289,035,388)    |
| High-income               | Group I    | 1,905,462,829,328<br>(1,724,843,797,195-2,135,811,357,815)       | 1,951,598,364,377<br>(1,770,190,946,589-2,184,076,993,118)       | 1,697,055,619,664<br>(1,510,195,689,202-1,936,654,676,513)       | 1,636,355,729,137<br>(1,446,275,602,688-1,887,484,330,156)       | 1,577,828,918,416<br>(1,384,466,023,274-1,836,021,018,605)       | 1,554,917,138,867<br>(1,360,202,620,757-1,818,315,627,747)       |
| High-income               | NCD        | 20,225,535,950,923<br>(18,070,482,622,348-22,666,742,498,940)    | 20,689,569,769,437<br>(18,410,348,835,737-23,270,533,988,057)    | 21,077,603,774,472<br>(18,680,415,411,644-23,799,884,342,633)    | 21,443,623,019,660<br>(18,897,575,705,089-24,319,193,605,781)    | 22,039,080,488,838<br>(19,338,324,190,458-25,081,918,874,355)    | 23,140,644,687,232<br>(20,534,020,542,272-26,647,531,291,820)    |
| High-income               | Injuries   | 2,903,547,455,546<br>(2,665,439,351,122-3,189,993,191,692)       | 2,840,270,995,953<br>(2,596,600,159,858-3,127,159,779,623)       | 2,685,684,031,390<br>(2,442,587,343,926-2,985,093,805,395)       | 2,600,251,822,748<br>(2,348,520,056,720-2,912,518,978,945)       | 2,426,446,875,232<br>(2,181,225,057,891-2,747,464,269,128)       | 2,402,411,981,786<br>(2,153,053,320,633-2,732,852,584,548)       |
| High-income North America | All causes | 8,040,614,886,649<br>(7,234,739,700,869-8,963,977,735,718)       | 8,429,848,852,425<br>(7,566,809,996,418-9,413,173,603,687)       | 8,555,432,147,604<br>(7,624,323,410,768-9,611,865,859,805)       | 8,924,156,136,424<br>(7,936,514,717,100-10,050,988,945,150)      | 9,141,393,395,061<br>(8,061,593,102,395-10,344,607,747,374)      | 9,723,670,287,216<br>(8,552,380,925,400-11,015,470,721,686)      |
| High-income North America | Group I    | 667,640,596,072<br>(613,898,237,225-732,038,194,047)             | 736,835,810,295<br>(680,264,939,533-809,234,330,763)             | 598,299,589,759<br>(535,731,807,047-680,005,983,256)             | 588,889,645,245<br>(522,740,462,390-674,252,992,250)             | 549,254,451,841<br>(481,595,386,097-639,534,778,102)             | 537,219,008,502<br>(467,961,903,614-629,117,256,399)             |
| High-income North America | NCD        | 6,423,921,000,472<br>(5,721,937,458,980-7,223,130,068,500)       | 6,765,085,183,347<br>(6,012,750,498,440-7,613,634,839,636)       | 7,057,510,254,978<br>(                                           |                                                                  |                                                                  |                                                                  |

Appendix Table 3. DALYs for all causes and level 1 cause groups by location for 1990 - 2015, both sexes combined.

|                          | Cause      | 1990                                                          | 1995                                                                        | 2000                                                        | 2005                                                        | 2010                                                                      | 2015                                                                      |
|--------------------------|------------|---------------------------------------------------------------|-----------------------------------------------------------------------------|-------------------------------------------------------------|-------------------------------------------------------------|---------------------------------------------------------------------------|---------------------------------------------------------------------------|
| United States            | Injuries   | 869 888 124 803<br>(816,800,369,033-934,117,950,146)          | 852 407 719 909<br>(794,771,054,723-921,205,473,226)                        | 828 094 902 278<br>(767,867,540,366-901,243,374,399)        | 888 788 823 432<br>(819,658,002,971-972,326,634,033)        | 823 811 465 412<br>(756,828,401,826-909,178,004,576)                      | 830 310 549 238<br>(758,332,652,018-921,941,214,011)                      |
| Australasia              | All causes | 525 345 180 716<br>(466,249,036,013-591,583,197,812)          | 554 569 992 564<br>(471,543,452,157-605,910,246,842)                        | 557 152 951 931<br>(457,880,102-623,923,008,109)            | 591 623 181 922<br>(484,235,857,918-640,693,111,938)        | 591 642 207 213<br>(510,900,810,518-682,145,617,742)                      | 638 421 243 989<br>(548,984,915,169-736,087,165,935)                      |
| Australasia              | Group I    | 31 265 812 036<br>(27,317,806,339-36,744,824,909)             | 30 313 136 463<br>(26,055,129,783-35,852,093,206)                           | 29 345 322 932<br>(24,768,328,123-35,070,231,043)           | 30 152 604 075<br>(25,390,923,211-36,485,292,883)           | 30 920 866 765<br>(25,834,199,432-37,531,414,533)                         | 30 690 295 564<br>(25,210,243,148-38,032,206,476)                         |
| Australasia              | NCD        | 436 632 581 949<br>(385,281,528,994-495,357,787,579)          | 451,107,103,103<br>(395,485,424,542-514,426,086,638)                        | 465,139,341,109<br>(405,392,090,202-534,185,026,372)        | 479,256,441,314<br>(414,728,178,611-552,773,314,601)        | 512,987,041,772<br>(441,495,373,932-592,687,467,610)                      | 558,558,750,828<br>(480,075,678,443-646,653,894,669)                      |
| Australasia              | Injuries   | 57,446,786,731<br>(53,386,749,794-62,037,795,990)             | 53,140,752,997<br>(49,017,080,595-58,037,591,676)                           | 51,668,285,890<br>(47,430,184,512-56,750,222,038)           | 48,344,136,533<br>(43,939,045,625-53,775,948,332)           | 47,734,298,676<br>(43,265,560,803-53,569,253,139)                         | 49,172,197,597<br>(44,328,922,910-55,440,551,174)                         |
| Australia                | All causes | 433 712 465 285<br>(384,197,443,547-489,329,268,010)          | 452 283 599 038<br>(388,567,156,682-500,800,133,693)                        | 452 283 599 038<br>(394,899,085,961-517,700,428,849)        | 461 337 417 700<br>(400,076,480,492-530,810,484,428)        | 491 957 899 504<br>(424,185,790,845-567,750,286,502)                      | 534 770 489 754<br>(460,191,959,430-617,021,582,031)                      |
| Australia                | Group I    | 25,731,039,467<br>(22,245,866,985-30,343,901,496)             | 25,136,834,897<br>(21,484,736,644-29,874,188,441)                           | 24,652,437,880<br>(20,742,126,082-29,548,897,596)           | 25,437,157,702<br>(21,402,115,359-30,776,875,285)           | 26,113,755,479<br>(21,780,354,136-31,801,528,444)                         | 26,116,707,685<br>(21,346,575,161-32,801,864,955)                         |
| Australia                | NCD        | 361,666,065,553<br>(318,475,372,148-410,909,485,731)          | 373,108,645,653<br>(326,705,027,316-426,048,975,116)                        | 385,358,558,135<br>(335,665,009,521-443,023,765,607)        | 396,695,217,070<br>(342,964,355,608-458,156,278,407)        | 426,930,223,281<br>(366,835,309,353-494,265,158,007)                      | 467,974,732,360<br>(402,167,635,702-542,035,896,946)                      |
| Australia                | Injuries   | 46,315,360,265<br>(42,964,198,877-50,159,687,896)             | 42,830,977,422<br>(39,434,994,699-46,900,764,969)                           | 42,272,603,024<br>(38,703,910,757-46,495,507,019)           | 39,205,042,527<br>(35,482,858,399-43,707,083,774)           | 38,893,920,744<br>(35,170,346,469-43,793,989,356)                         | 40,679,049,708<br>(36,600,670,877-46,007,150,393)                         |
| New Zealand              | All causes | 91 632 715 431<br>(82,297,533,372-102,303,724,806)            | 93 484 534 592<br>(83,131,703,725-105,304,241,237)                          | 93 869 352 893<br>(82,792,001,892-106,343,059,105)          | 96 415 764 622<br>(84,159,377,426-109,990,818,227)          | 99 684 307 709<br>(86,730,917,061-114,110,363,560)                        | 103 650 754 235<br>(89,381,637,031-119,040,259,792)                       |
| New Zealand              | Group I    | 5,534,772,568<br>(4,908,716,698-6,323,231,455)                | 5,176,301,567<br>(4,495,403,437-6,037,147,839)                              | 4,692,885,052<br>(3,974,277,526-5,642,347,881)              | 4,715,466,572<br>(3,949,004,269-5,728,504,385)              | 4,807,111,286<br>(4,009,788,079-5,834,732,743)                            | 4,573,587,879<br>(3,769,769,182-5,618,181,275)                            |
| New Zealand              | NCD        | 74 966 516 396<br>(66,655,730,028-84,312,909,818)             | 77 998 457 450<br>(68,774,999,347-88,457,851,644)                           | 79 780 784 974<br>(69,998,998,847-91,067,851,142)           | 82 561 224 244<br>(71,763,918,057-94,578,958,982)           | 86 036 818 491<br>(74,610,752,558-98,899,487,034)                         | 90 584 018 468<br>(77,761,161,824-104,241,378,593)                        |
| New Zealand              | Injuries   | 11 131 426 466<br>(10,435,074,839-11,930,768,130)             | 10 309 775 575<br>(9,602,828,136-11,599,045,056)                            | 9 395 682 867<br>(8,694,053,262-10,248,705,390)             | 9 139 094 006<br>(8,405,242,363-10,028,933,691)             | 8 840 377 932<br>(8,086,312,298-9,781,771,424)                            | 8 493 147 888<br>(7,659,766,844-9,502,243,584)                            |
| High-income Asia Pacific | All causes | 3 447 590 540 922<br>(3,117,168,832,386)                      | 3 564 753 555 938<br>(3,166,714,925,042)                                    | 4 016 369 332 361<br>(3,552,586,242,475-4,522,211,686,732)  | 4 066 295 806 736<br>(3,581,179,906,969-4,553,003,552)      | 4 147 685 919 929<br>(3,645,596,535,640-4,646,391,711)                    | 4 385 278 004 279<br>(3,853,249,571,799-4,920,015,108,816)                |
| High-income Asia Pacific | Group I    | 3 055 850 466 276<br>(2,776,629,441,029-3,366,437,431,820)    | 3 160 626 129 595<br>(2,688,781,237,931-3,541,755,449,841)                  | 3 229 120 446 120<br>(2,599,097,529,229-3,446,159,190)      | 3 219 101 107 107<br>(2,488,333,705,798-3,311,089,107,945)  | 3 421 582 183 319<br>(2,558,628,819,049-3,366,462,487,406)                | 3 659 289 621 360<br>(2,651,132,746,600-3,481,618,778)                    |
| High-income Asia Pacific | NCD        | 492 759 363 936<br>(455,649,801,672-535,564,982,391)          | 542 917 746 610<br>(482,810,679,489-613,095,645,244)                        | 491 292 764 430<br>(452,823,743,534-538,252,023,640)        | 462 857 851 544<br>(424,741,120,213-512,345,966,688)        | 426 100 242 841<br>(400,455,965,727-486,622,540,958)                      | 426 100 242 841<br>(386,399,904,734-477,919,559,494)                      |
| Brunei                   | All causes | 668 457 860<br>(602,362,355-767,232,152)                      | 674 265 170<br>(595,065,517-777,610,598)                                    | 676 962 544<br>(576,418,088-777,159,257)                    | 676 962 544<br>(583,601,383-806,012,211)                    | 676 962 544<br>(601,105,095-837,469,355)                                  | 738 314 641<br>(631,182,551-874,741,477)                                  |
| Brunei                   | Group I    | 3 540 891 626<br>(3,115,135,676-4,021,757,118)                | 4,012,070,577<br>(3,512,406,958-4,567,467,037)                              | 4,298,412,531<br>(3,725,700,329-4,945,162,587)              | 4,835,395,397<br>(4,185,548,669-5,553,573,511)              | 4,835,395,397<br>(4,764,897,600-6,324,113,966)                            | 4,621,323,270<br>(5,566,882,272-7,354,108,414)                            |
| Brunei                   | NCD        | 862 957 895<br>(774,707,997-950,051,698)                      | 998 354 397<br>(820,834,209-987,246,229)                                    | 861 256 249<br>(786,313,998-940,814,029)                    | 831 261 133<br>(750,313,808-922,451,654)                    | 863,628,956<br>(678,649,137-961,632,018)                                  | 899,891,965<br>(793,734,809-1,023,934,435)                                |
| Brunei                   | Injuries   | 2,727,374,594,530<br>(2,414,143,369,422-3,081,617,041,459)    | 2,885,719,966,082<br>(2,556,192,567,674-3,262,356,664,586)                  | 2,928,451,464,081<br>(2,582,952,123,803-3,320,729,580,616)  | 2,996,139,812<br>(2,445,221,041,449-3,403,164,743,862)      | 3,056,462,393,813<br>(2,285,117,908,208-4,373,562,490,430)                | 3,214,956,642,013<br>(2,826,725,789,262-3,694,597,949,664)                |
| Japan                    | All causes | 203 458 150 952<br>(179,195,387,462-234,223,974,358)          | 214,780,824,212<br>(190,829,417,510-245,762,376,919)                        | 213,192,620,318<br>(189,267,610,474-243,994,251,111)        | 210,754,570,695<br>(187,536,228,920-241,284,977,614)        | 214,919,284,120<br>(192,810,039,426-246,128,566,920)                      | 226,897,843,522<br>(204,487,492,050-252,870,791,659)                      |
| Japan                    | Group I    | 2,334,617,662,860<br>(1,967,536,482,932-2,533,076,170,039)    | 2,334,317,727,537<br>(2,056,895,034,029-2,650,763,517,851)                  | 2,400,898,786,629<br>(2,108,521,607,308-2,724,629,495,977)  | 2,482,897,469,679<br>(2,177,331,281,741-2,831,585,618,364)  | 2,556,101,700,507<br>(2,237,644,748,726-2,920,442,417,814)                | 2,710,630,609,692<br>(2,365,934,622,734-3,093,781,826,050)                |
| Japan                    | NCD        | 289,296,780,719<br>(265,712,328,489-317,604,555,165)          | 336,621,369,332<br>(288,131,836,840-397,907,882,988)                        | 347,061,374,071<br>(287,216,097,865-417,760,338,131)        | 305,265,342,368<br>(278,954,541,669-338,677,838,061)        | 285,441,411,886<br>(258,912,328,613-319,620,192,626)                      | 277,428,188,798<br>(250,293,288,954-314,548,341,411)                      |
| Japan                    | Injuries   | 56,784,111,462<br>(50,878,915,406-63,421,141,285)             | 58,415,204,983<br>(51,870,008,695-65,923,623,729)                           | 60,477,127,302<br>(52,891,517,248-68,426,050,060)           | 62,909,665,504<br>(54,925,220,852-71,969,389,495)           | 65,937,466,416<br>(57,926,514,914-76,254,570,224)                         | 70,507,064,642<br>(61,264,950,022-81,334,240,771)                         |
| Singapore                | All causes | 6,552,626,701<br>(5,868,446,047-7,426,308,116)                | 6,263,678,215<br>(5,546,330,777-7,207,237,594)                              | 6,422,262,560<br>(5,637,369,852-7,472,774,857)              | 6,422,023,249<br>(5,650,331,151-7,526,116,766)              | 6,866,480,390<br>(6,062,613,807-7,960,270,162)                            | 7,445,991,393<br>(6,564,285,739-8,537,522,630)                            |
| Singapore                | Group I    | 43 894 846 932<br>(39,075,214,899-49,291,868,033)             | 46 317 724 358<br>(40,894,088,946-52,376,452,548)                           | 48 125 439 184<br>(42,131,458,415-54,876,033,388)           | 51 176 117 119<br>(44,496,142,877-58,686,429,162)           | 54 874 926 581<br>(47,241,145,644-63,256,634,183)                         | 58 288 384 486<br>(50,184,284,184-67,592,590,793)                         |
| Singapore                | NCD        | 5,336,637,828<br>(5,785,405,139-7,001,943,460)                | 5,833,802,409<br>(5,210,416,740-6,576,217,413)                              | 5,999,470,558<br>(4,888,516,231-6,222,264,050)              | 5,311,525,136<br>(4,697,290,181-6,102,268,109)              | 5,852,059,456<br>(4,239,905,469-6,659,002,987)                            | 6,772,688,763<br>(4,121,312,956-6,644,343,724)                            |
| Singapore                | Injuries   | 1,076,547,649,224<br>(971,657,815,241-1,191,592,096,656)      | 1,076,547,649,224<br>(955,705,226,343-1,179,461,542,516)                    | 1,076,547,649,224<br>(907,127,917,150-1,152,873,861,833)    | 1,076,547,649,224<br>(878,064,903,004-1,135,771,634,040)    | 1,076,547,649,224<br>(887,226,214,483-1,165,044,680,422)                  | 1,076,547,649,224<br>(954,433,211,197-1,249,270,868,908)                  |
| South Korea              | All causes | 106,489,596,873<br>(90,837,422,045-126,159,320,656)           | 84,456,158,345<br>(71,580,768,367-100,688,729,444)                          | 77,806,807,775<br>(64,200,016,712-90,237,014,939)           | 780,192,124,912<br>(54,936,538,278-81,546,890,270)          | 805,108,612,059<br>(53,795,553,880-81,633,289,342)                        | 883,949,303,912<br>(53,554,773,955-80,726,678,996)                        |
| South Korea              | Group I    | 196,262,987,493<br>(182,882,323,629-211,683,317,137)          | 199,564,220,521<br>(185,544,965,445-216,165,107,925)                        | 170,562,943,409<br>(158,653,763,852-185,891,900,882)        | 151,449,723,781<br>(139,314,892,541-165,589,192,948)        | 146,857,321,447<br>(136,049,514,286-160,520,470,723)                      | 142,999,473,315<br>(130,436,529,379-157,875,121,361)                      |
| South Korea              | NCD        | 11,881,328,271,182<br>(10,017,133,716,959-12,515,174,594,271) | 1,059,998,940,988<br>(957,690,229,830)<br>(573,745,714,550-734,429,461,606) | 1,059,998,940,988<br>(859,791,886,445-1,260,991,961,765)    | 1,059,998,940,988<br>(499,946,126,644-1,603,059,979,330)    | 1,059,998,940,988<br>(471,643,600,644-1,638,834,921,335)                  | 1,059,998,940,988<br>(439,347,833,633-1,621,947,621,303)                  |
| Western Europe           | All causes | 1,181,328,271,182<br>(1,017,133,716,959-12,515,174,594,271)   | 1,090,229,871,189<br>(986,393,694,942-12,455,807,351,951)                   | 1,060,731,547,074<br>(965,406,951,701-12,306,619,772,295)   | 1,060,731,547,074<br>(939,417,279,229-12,133,562,423,403)   | 1,060,731,547,074<br>(9,295,624,326,214-12,141,621,171,905)               | 1,060,731,547,074<br>(9,299,440,039-12,602,529,037,768)                   |
| Western Europe           | Group I    | 643,293,744,601<br>(573,745,714,550-734,429,461,606)          | 657,690,229,830<br>(589,791,886,445-750,987,961,765)                        | 670,369,682,962<br>(499,946,126,644-1,603,059,979,330)      | 670,369,682,962<br>(471,643,600,644-1,638,834,921,335)      | 670,369,682,962<br>(523,198,024,600)<br>(452,609,663,877-621,947,536,340) | 670,369,682,962<br>(511,590,801,819)<br>(439,347,833,633-612,947,621,303) |
| Western Europe           | NCD        | 9,304,523,100,049<br>(8,332,494,602,083-10,391,322,134,145)   | 9,282,147,574,221<br>(8,266,535,542,028-10,415,672,347,299)                 | 9,256,456,321,628<br>(8,209,017,075,774-10,432,936,355,384) | 9,163,766,576,654<br>(8,071,172,024,382-10,402,788,016,480) | 9,233,399,694,256<br>(8,098,999,435,392-10,519,080,788,330)               | 9,640,986,604,489<br>(8,455,579,844,562-11,020,055,198,222)               |
| Western Europe           | Injuries   | 1,233,511,426,533<br>(1,105,885,052,265-1,388,158,931,176)    | 1,137,570,511,889<br>(1,011,880,771,764-1,289,285,842,749)                  | 1,061,403,646,599<br>(937,949,158,481-1,209,906,325,118)    | 955,828,132,841<br>(836,237,001-1,067,788,055,819)          | 866,842,706,588<br>(750,448,509,660-1,015,148,677,692)                    | 846,402,312,167<br>(730,143,825,745-997,442,997,054)                      |
| Andorra                  | All causes | 1 098 127 029<br>(945 901                                     |                                                                             |                                                             |                                                             |                                                                           |                                                                           |

Appendix Table 3. DALYs for all causes and level 1 cause groups by location for 1990 - 2015, both sexes combined.

|         | Cause      | 1990                                                       | 1995                                                       | 2000                                                       | 2005                                                       | 2010                                                       | 2015                                                       |
|---------|------------|------------------------------------------------------------|------------------------------------------------------------|------------------------------------------------------------|------------------------------------------------------------|------------------------------------------------------------|------------------------------------------------------------|
| Austria | NCD        | 194,532,004,551<br>(174,624,899,670-216,693,581,821)       | 193,105,556,391<br>(172,127,429,846-216,306,204,452)       | 189,801,072,018<br>(168,435,124,838-213,473,764,985)       | 186,453,084,213<br>(163,956,762,037-210,978,130,737)       | 188,605,214,898<br>(165,592,848,007-214,632,680,888)       | 196,870,556,574<br>(172,340,398,603-224,341,967,391)       |
|         | Injuries   | 29,408,240,974<br>(26,519,690,774-32,745,384,024)          | 26,457,674,501<br>(23,726,378,229-29,729,945,898)          | 23,881,471,160<br>(21,182,479,867-27,076,564,372)          | 21,758,743,951<br>(19,147,780,169-25,115,327,766)          | 21,758,743,951<br>(19,307,466,951-23,187,240,340)          | 19,062,626,687<br>(16,496,151,280-22,349,441,733)          |
| Belgium | All causes | 300,693,980,374<br>(269,991,196,247-335,566,964,275)       | 297,226,509,644<br>(267,834,689,972-335,186,943,534)       | 287,880,986,702<br>(265,422,645,248-334,536,653,535)       | 287,880,986,702<br>(254,856,967,120-325,945,087,410)       | 289,260,708,318<br>(254,276,327,244-328,641,766,604)       | 300,545,301,791<br>(262,236,742,648-342,050,995,156)       |
|         | Group I    | 14,752,167,339<br>(13,196,962,638-16,669,617,858)          | 14,798,233,444<br>(13,307,413,244-16,742,895,258)          | 14,976,778,919<br>(13,473,398,927-16,900,153,560)          | 14,876,334,262<br>(13,236,929,605-16,816,066,485)          | 14,842,156,833<br>(13,067,375,233-16,767,479,455)          | 14,440,887,877<br>(12,664,360,076-16,550,906,427)          |
| Belgium | NCD        | 249,683,934,663<br>(222,994,294,389-279,216,294,455)       | 249,043,360,524<br>(221,839,403,394-279,819,796,126)       | 247,813,958,058<br>(220,332,311,978-278,913,332,993)       | 241,381,916,040<br>(212,715,481,378-277,484,176,339)       | 242,420,870,323<br>(214,471,125,199-278,495,763,348)       | 256,184,296,872<br>(223,025,606,455-292,640,937,880)       |
|         | Injuries   | 36,257,878,371<br>(32,902,485,972-40,346,189,798)          | 35,384,915,075<br>(32,119,316,751-39,529,363,605)          | 36,062,582,455<br>(31,421,959,773-39,244,449,282)          | 31,656,913,829<br>(28,139,938,260-36,039,164,044)          | 30,161,403,734<br>(26,694,477,623-34,493,116,885)          | 29,920,117,042<br>(26,322,550,315-34,347,348,509)          |
| Cyprus  | All causes | 16,608,095,033<br>(14,773,251,140-18,701,443,181)          | 17,336,064,093<br>(15,405,360,664-19,532,692,318)          | 17,282,842,012<br>(15,263,298,147-19,596,754,438)          | 17,885,723,484<br>(15,693,573,327-20,403,054,560)          | 18,824,878,965<br>(16,319,670,180-21,767,000,582)          | 19,071,686,972<br>(16,345,178,008-22,178,336,173)          |
|         | Group I    | 1,553,232,311<br>(1,382,961,434-1,746,094,771)             | 1,305,570,347<br>(1,154,110,197-1,497,616,106)             | 1,096,009,800<br>(953,462,267-1,277,156,042)               | 979,508,293<br>(838,633,419-1,160,827,666)                 | 940,067,638<br>(788,941,219-1,134,850,660)                 | 894,532,429<br>(742,502,621-1,098,566,986)                 |
| Cyprus  | NCD        | 13,066,761,525<br>(11,532,590,194-14,789,567,061)          | 13,999,409,600<br>(12,355,730,321-15,887,369,139)          | 14,173,663,918<br>(12,479,505,238-16,080,401,122)          | 14,781,349,780<br>(12,884,571,125-16,940,018,215)          | 16,036,625,648<br>(13,841,559,842-18,584,559,515)          | 16,448,586,094<br>(14,041,530,623-19,196,136,763)          |
|         | Injuries   | 1,988,101,197<br>(1,788,573,709-2,234,444,712)             | 2,033,084,147<br>(1,823,940,472-2,294,606,322)             | 2,103,168,957<br>(1,804,413,912-2,276,811,752)             | 2,124,865,410<br>(1,887,433,243-2,412,983,362)             | 1,848,185,679<br>(1,611,889,660-2,155,366,248)             | 1,728,568,449<br>(1,485,488,734-2,050,139,632)             |
| Denmark | All causes | 165,557,694,395<br>(149,845,027,080-183,551,987,920)       | 165,885,350,409<br>(149,630,081,202-184,069,273,475)       | 156,530,896,743<br>(139,949,856,076-175,240,792,345)       | 151,073,382,829<br>(134,098,911,381-170,403,471,200)       | 149,007,520,527<br>(131,718,867,419-168,266,551,655)       | 149,040,008,678<br>(131,111,709-169,109,306,735,274)       |
|         | Group I    | 7,897,786,003<br>(7,072,754,637-9,029,651,973)             | 8,471,592,972<br>(7,615,740,801-9,663,280,242)             | 7,113,188,666<br>(6,174,064,457-8,387,846,389)             | 7,340,018,479<br>(6,359,993,510-8,668,076,720)             | 7,307,485,203<br>(6,308,630,461-8,705,825,975)             | 6,931,627,581<br>(5,925,082,466-8,295,188,407)             |
| Denmark | NCD        | 138,815,769,342<br>(125,455,622,781-153,750,996,028)       | 141,173,810,640<br>(127,324,535,932-156,691,282,980)       | 135,785,245,146<br>(121,569,698,213-151,854,477,032)       | 132,196,462,205<br>(117,397,464,798-148,420,266,181)       | 131,468,181,464<br>(116,232,190,138-148,216,486,279)       | 132,420,966,521<br>(116,089,988,196-149,876,045,553)       |
|         | Injuries   | 18,844,139,050<br>(17,047,134,802-21,045,441,771)          | 16,239,946,769<br>(14,639,644,762-18,117,895,957)          | 15,632,462,932<br>(14,166,236,680-17,422,877,520)          | 11,365,902,145<br>(10,219,053,922-13,230,858,888)          | 10,231,913,800<br>(8,948,814,373-11,852,965,881)           | 9,697,314,575<br>(8,397,275,962-11,301,081,142)            |
| Finland | All causes | 152,579,718,174<br>(137,092,618,842-170,409,221,474)       | 147,085,857,484<br>(130,772,849,098-164,980,646,022)       | 146,090,308,744<br>(129,308,348,127-164,781,135,427)       | 145,681,142,365<br>(128,497,927,691-165,436,345,913)       | 146,328,760,899<br>(128,662,016,739-166,846,739,015)       | 148,428,688,316<br>(130,307,577,550-169,701,183,786)       |
|         | Group I    | 9,101,821,469<br>(7,903,456,491-10,659,963,558)            | 8,448,555,719<br>(7,288,944,970-9,950,340,705)             | 7,358,549,110<br>(6,309,339,087-8,729,790,225)             | 5,987,723,565<br>(4,975,702,185-7,357,556,615)             | 5,262,518,448<br>(4,225,827,141-6,620,587,543)             | 4,994,472,156<br>(3,963,362,073-6,288,477,062)             |
| Finland | NCD        | 121,359,633,188<br>(108,562,265,465-135,894,568,242)       | 119,385,546,799<br>(105,847,811,764-134,106,334,230)       | 120,921,348,415<br>(106,892,439,458-136,534,483,756)       | 122,205,172,553<br>(107,588,218,632-138,154,396,124)       | 125,101,013,105<br>(110,032,142,557-141,720,381,758)       | 128,517,653,619<br>(112,652,907,429-145,779,758,313)       |
|         | Injuries   | 22,218,263,517<br>(20,320,712,404-24,222,964,002)          | 19,231,754,966<br>(17,593,146,899-21,195,246,080)          | 17,810,411,219<br>(16,181,288,265-19,812,521,385)          | 17,488,246,247<br>(15,583,039,269-19,843,014,288)          | 15,965,229,345<br>(14,017,459,125-18,731,282,087)          | 14,916,562,541<br>(12,977,879,620-17,366,476,951)          |
| France  | All causes | 1,561,005,290,498<br>(1,391,046,473,761-1,757,575,105,389) | 1,561,163,562,154<br>(1,381,164,640,351-1,759,396,897,199) | 1,537,557,333,385<br>(1,379,996,220,108-1,768,793,662,774) | 1,537,557,333,385<br>(1,349,246,577,660-1,756,667,730,995) | 1,541,579,127,200<br>(1,353,537,539,687-1,774,228,625,195) | 1,618,463,114,358<br>(1,415,134,887,323-1,855,887,031,610) |
|         | Group I    | 103,868,078,492<br>(93,391,617,894-117,882,362,148)        | 106,180,090,394<br>(95,713,049,803-120,950,228,045)        | 81,944,857,382<br>(76,740,200,720-101,807,667,326)         | 81,944,311,320<br>(70,955,612,850-97,345,063,769)          | 79,277,333,340<br>(69,363,037,730-96,514,704,839)          | 79,277,333,340<br>(67,357,048,194-95,594,981,148)          |
| France  | NCD        | 1,211,716,615,568<br>(1,073,611,197,588-1,366,577,919,181) | 1,221,764,398,572<br>(1,077,509,565,671-1,382,816,410,022) | 1,208,335,255,154<br>(1,113,298,452,656-1,425,510,869,298) | 1,266,662,885,399<br>(1,109,532,459,769-1,441,742,930,911) | 1,291,799,715,085<br>(1,127,319,817,986-1,478,917,646,393) | 1,365,310,765,210<br>(1,192,827,445,274-1,561,622,486,105) |
|         | Injuries   | 245,420,596,438<br>(222,592,895,931-273,432,094,850)       | 228,187,427,212<br>(204,925,148,906-255,566,678,182)       | 232,683,449,619<br>(210,798,636,238-260,718,180)           | 188,910,106,666<br>(167,348,693,110-215,472,911,622)       | 175,056,938,511<br>(153,685,068,500-201,492,600,145)       | 173,875,015,808<br>(152,081,742,631-200,579,025,146)       |
| Germany | All causes | 2,541,145,292,558<br>(2,287,070,359,098-2,827,433,888,760) | 2,485,317,263,105<br>(2,221,464,865,855-2,779,690,226,999) | 2,392,206,177,104<br>(2,127,609,745,669-2,693,062,067,894) | 2,315,056,656,719<br>(2,044,332,378,834-2,692,922,786,933) | 2,287,755,868,808<br>(2,017,680,299,392-2,593,626,086,120) | 2,390,573,023,996<br>(2,102,358,334,613-2,712,290,452,026) |
|         | Group I    | 119,744,471,419<br>(104,562,034,430-139,937,310,914)       | 109,958,921,011<br>(94,381,985,475-130,336,013,063)        | 100,698,668,439<br>(85,400,875,435-121,113,842,433)        | 98,158,068,609<br>(83,526,492,917-117,890,514,323)         | 96,858,615,439<br>(82,501,565,107-115,713,432,226)         | 97,435,332,844<br>(83,163,759,587-117,377,643,882)         |
| Germany | NCD        | 2,175,627,885,897<br>(1,965,167,946,826-2,415,175,900,507) | 2,146,375,873,050<br>(1,922,578,304,944-2,395,021,633,622) | 2,086,715,486,603<br>(1,861,483,759,540-2,342,984,266,845) | 2,037,396,134,886<br>(1,806,495,314,137-2,300,265,161,414) | 2,028,140,836,556<br>(1,791,830,059,342-2,294,815,056,075) | 2,130,912,055,128<br>(1,876,801,927,088-2,409,242,929,803) |
|         | Injuries   | 245,772,935,243<br>(219,317,742,340-277,616,621,947)       | 228,982,469,044<br>(202,716,280,999-259,834,644,497)       | 204,792,022,062<br>(179,910,134,464-235,047,055,979)       | 179,502,453,224<br>(155,623,378,834-209,175,059,652)       | 162,756,616,813<br>(139,649,989,287-190,644,431,040)       | 162,225,636,024<br>(137,903,518,106-191,817,103,335)       |
| Greece  | All causes | 276,400,899,142<br>(246,490,897,419-310,837,935,043)       | 286,630,952,464<br>(254,849,396,621-323,736,756,455)       | 294,452,462,299<br>(261,563,571,006-333,043,613,150)       | 294,193,410,168<br>(259,997,567,868-333,210,239,965)       | 291,892,460,149<br>(257,000,869,147-332,418,478,526)       | 294,661,443,855<br>(260,094,848,751-334,043,920,379)       |
|         | Group I    | 13,746,858,539<br>(11,883,622,726-16,218,540,292)          | 13,511,593,524<br>(11,668,098,811-16,079,987,167)          | 12,772,213,737<br>(10,937,578,865-15,216,949,885)          | 12,688,515,703<br>(10,405,957,263-14,576,957,909)          | 11,740,923,422<br>(9,945,306,285-14,183,485,478)           | 10,587,869,940<br>(8,764,555,082-12,875,630,174)           |
| Greece  | NCD        | 221,878,744,465<br>(206,767,262,537-259,677,586,917)       | 242,479,346,076<br>(215,509,813,232-272,767,288,591)       | 252,088,071,252<br>(223,849,462,315-283,892,692,754)       | 255,223,734,574<br>(226,003,774,853-287,771,594,617)       | 257,018,401,380<br>(226,969,800,020-290,936,029,468)       | 263,529,619,240<br>(232,339,171,279-298,756,345,101)       |
|         | Injuries   | 30,835,296,137<br>(27,158,122,262-35,200,040,995)          | 30,640,012,864<br>(26,973,036,561-34,967,189,544)          | 29,992,177,310<br>(25,967,149,560-33,964,107,802)          | 26,701,159,891<br>(23,268,421,613-30,901,789,966)          | 20,543,954,675<br>(19,902,262,896-27,250,654,188)          | 20,543,954,675<br>(17,489,158,452-24,441,853,575)          |
| Iceland | All causes | 408,879,811<br>(362,415,611-469,834,160)                   | 401,779,680<br>(352,029,406-464,887,977)                   | 346,181,449<br>(294,454,491-413,519,132)                   | 329,913,685<br>(277,471,547-400,273,864)                   | 326,250,225<br>(268,714,221-400,173,192)                   | 317,916,297<br>(262,027,861-393,232,857)                   |
|         | Group I    | 4,587,665,419<br>(4,012,888,154-5,243,530,764)             | 4,721,479,080<br>(4,101,147,401-5,408,727,230)             | 4,821,968,232<br>(4,164,024,253-5,559,520,743)             | 4,992,883,418<br>(4,285,125,377-5,777,916,145)             | 5,448,598,677<br>(4,420,775,353-6,457,566,120)             | 5,448,598,677<br>(4,606,910,265-6,352,198,695)             |
| Iceland | NCD        | 625,332,007<br>(621,822,645-782,186,001)                   | 625,122,106<br>(886,191,913-1,395,466,130)                 | 608,949,594<br>(551,638,092-716,983,352)                   | 608,949,594<br>(529,675,333-706,147,846)                   | 549,530,595<br>(479,039,000-634,011,073)                   | 527,609,525<br>(455,469,578-615,089,021)                   |
|         | Injuries   | 89,401,388,891<br>(79,305,683,173-101,005,208,038)         | 89,120,372,089<br>(78,919,999,163-101,043,162,889)         | 92,633,424,792<br>(81,514,647,762-105,189,291,765)         | 92,430,933,799<br>(80,211,806,289-106,555,686,772)         | 94,668,918,054<br>(81,191,375,940-109,549,584,359)         | 98,887,054,927<br>(85,056,737,357-114,812,193,890)         |
| Ireland | All causes | 6,467,453,808<br>(5,629,663,614-7,543,272,056)             | 6,260,336,789<br>(5,463,169,526-7,320,516,205)             | 6,348,116,936<br>(5,445,591,286-7,308,334,244)             | 5,810,293,389<br>(4,930,080,797-6,990,056,837)             | 5,633,628,733<br>(4,851,586,046-7,165,299,248)             | 5,633,628,733<br>(4,633,820,502-7,012,657,051)             |
|         | Group I    | 73,318,435,159<br>(64,586,324,652-82,943,623,603)          | 72,920,658,425<br>(65,125,725,659-83,962,020,589)          | 77,057,991,926<br>(67,637,294,599-87,632,890,641)          | 78,380,321,181<br>(70,808,622,282-90,295,618,548)          | 78,380,321,181<br>(69,547,421,196-93,971,310,959)          | 85,709,431,892<br>(73,159,649,030-99,271,620,799)          |
| Ireland | NCD        | 9,615,500,424<br>(8,580,589,628-10,799,449,785)            | 9,939,374,916<br>(8,013,756,109-10,044,815,092)            | 9,327,135,889<br>(8,387,274,628-10,486,907,692)            | 8,240,339,618<br>(7,250,513,214-9,429,511,618)             | 7,750,616,957<br>(6,760,313,051-8,929,941,893)             | 7,544,994,303<br>(6,548,570,214-8,809,365,071)             |
|         | Injuries   | 101,208,196,819<br>(89,880,273,217-114,552,831,276)        | 118,489,486,926<br>(104,727,355,115-134,149,397,170)       | 128,630,064,025<br>(112,979,                               |                                                            |                                                            |                                                            |

**Appendix Table 3. DALYs for all causes and level 1 cause groups by location for 1990 - 2015, both sexes combined.**

|                | Cause    | 1990                                                       | 1995                                                       | 2000                                                       | 2005                                                       | 2010                                                       | 2015                                                       |
|----------------|----------|------------------------------------------------------------|------------------------------------------------------------|------------------------------------------------------------|------------------------------------------------------------|------------------------------------------------------------|------------------------------------------------------------|
| Italy          | Group I  | 78,884,407.388<br>(70,856,821,370-89,134,382,715)          | 81,938,051,439<br>(74,090,566,659-92,047,454,992)          | 59,933,268,304<br>(52,506,741,360-69,682,766,335)          | 55,835,366,634<br>(48,706,275,217-65,269,927,922)          | 54,964,715,908<br>(47,268,740,956-64,764,373,481)          | 52,866,052,647<br>(45,015,662,555-62,294,824,237)          |
|                |          | 1,372,485,104,105<br>(1,223,343,036,412-1,541,236,295,875) | 1,356,621,825,297<br>(1,210,563,271,421-1,538,689,683,267) | 1,325,841,825,297<br>(1,198,942,829,978-1,536,272,328,788) | 1,325,849,051,594<br>(1,160,942,996,754-1,515,349,522,647) | 1,302,601,620,605<br>(1,188,001,472,891-1,561,416,726,055) | 1,465,463,713,286<br>(1,281,440,828,858-1,679,753,473,518) |
| Italy          | Injuries | 169,136,831,776<br>(149,836,328,660-192,618,923,257)       | 158,883,811,277<br>(139,721,236,070-182,359,404,560)       | 147,471,125,941<br>(128,933,906,390-170,343,200,816)       | 130,677,801,156<br>(113,047,019,081-153,124,339,089)       | 97,349,913<br>(87,874,848,293-137,758,729,148)             | 115,406,510,571<br>(98,232,605,230-137,410,618,960)        |
|                |          | 11,964,656,260<br>(10,757,904,842-13,381,072,353)          | 11,666,197,570<br>(10,350,252,180-13,154,504,709)          | 11,413,673,364<br>(10,011,751,630-12,971,760,451)          | 11,253,414,494<br>(9,791,417,573-12,865,822,131)           | 11,585,195,924<br>(9,997,184,730-13,409,896,700)           | 12,298,263,002<br>(10,546,824,590-14,288,638,402)          |
| Luxembourg     | Group I  | 549,952,945<br>(481,038,459-640,370,590)                   | 545,233,841<br>(470,312,081-641,949,653)                   | 517,336,774<br>(440,876,214-617,129,291)                   | 508,966,685<br>(426,650,526-613,535,972)                   | 530,291,967<br>(440,353,444-647,820,281)                   | 552,239,970<br>(455,128,426-682,553,887)                   |
|                |          | 9,943,777,337<br>(8,922,123,725-11,132,895,178)            | 9,776,676,743<br>(8,659,335,725-11,040,072,006)            | 9,671,141,149<br>(8,471,477,196-10,981,736,879)            | 9,650,806,792<br>(8,402,021,124-11,051,643,566)            | 10,057,544,044<br>(8,672,017,951-11,640,074,893)           | 10,729,443,688<br>(9,197,210,704-12,476,369,856)           |
| Luxembourg     | Injuries | 1,470,925,978<br>(1,316,964,524-1,663,900,725)             | 1,344,286,986<br>(1,189,996,255-1,530,053,673)             | 1,225,195,441<br>(1,072,897,846-1,406,463,290)             | 1,225,195,441<br>(933,538,539-1,247,959,026)               | 1,073,641,017<br>(854,196,283-1,171,387,027)               | 1,016,579,343<br>(867,043,253-1,206,368,400)               |
|                |          | 8,462,413,648<br>(7,461,416,762-9,622,196,673)             | 8,564,743,091<br>(7,505,016,456-9,837,725,236)             | 8,904,750,525<br>(7,724,161,887-10,218,378,491)            | 9,037,611,356<br>(7,823,466,302-10,434,628,312)            | 9,598,137,801<br>(8,293,097,758-11,086,222,165)            | 9,936,937,927<br>(8,594,876,595-11,474,985,368)            |
| Malta          | Group I  | 622,492,181<br>(545,091,465-721,770,317)                   | 628,827,023<br>(547,426,810-731,168,106)                   | 550,833,825<br>(473,922,035-650,044,213)                   | 495,872,104<br>(423,230,168-589,392,745)                   | 488,699,483<br>(417,116,166-585,219,499)                   | 476,338,834<br>(404,880,812-568,816,207)                   |
|                |          | 7,077,923,455<br>(6,237,112,758-8,032,064,645)             | 7,207,855,272<br>(6,306,797,258-8,292,405,185)             | 7,620,795,796<br>(6,610,393,535-8,776,210,194)             | 7,860,591,731<br>(6,810,600,871-9,088,004,163)             | 8,457,498,139<br>(7,299,026,307-9,732,847,931)             | 8,831,601,759<br>(7,651,941,275-10,199,932,479)            |
| Malta          | Injuries | 761,998,013<br>(660,729,406-883,654,508)                   | 728,100,795<br>(624,141,030-852,753,840)                   | 733,120,903<br>(623,966,548-861,848,145)                   | 681,147,521<br>(572,289,605-813,919,301)                   | 651,940,180<br>(543,594,477-791,656,450)                   | 628,997,335<br>(515,982,554-771,830,008)                   |
|                |          | 397,166,881,974<br>(352,384,391,591-446,886,084,462)       | 408,801,468,102<br>(362,640,059,019-461,690,642,391)       | 420,303,143,307<br>(371,112,514,604-475,697,991,267)       | 408,079,281,302<br>(357,067,021,552-465,926,381,728)       | 404,843,838,616<br>(353,010,100,989-465,172,521,219)       | 421,096,690,434<br>(366,123,366,190-473,060,473,060)       |
| Netherlands    | Group I  | 20,792,709,778<br>(18,390,637,509-23,980,394,211)          | 22,427,300,022<br>(19,992,134,776-25,676,354,064)          | 22,915,882,664<br>(20,438,957,132-26,210,481,524)          | 21,373,390,653<br>(18,914,692,646-24,729,199,006)          | 19,707,687,421<br>(17,251,606,498-23,064,809,831)          | 19,480,658,770<br>(17,002,070,778-22,947,132,494)          |
|                |          | 342,300,273,481<br>(304,004,681,817-385,272,406,884)       | 353,680,183,246<br>(312,863,283,354-399,570,796,138)       | 365,351,774,209<br>(321,388,459,898-412,904,532,617)       | 357,568,541,244<br>(312,400,385,440-407,890,999,570)       | 337,553,294,952<br>(312,003,861,109-408,863,107,992)       | 373,467,386,326<br>(323,603,048,400-427,321,794,200)       |
| Netherlands    | Injuries | 33,873,898,715<br>(30,366,580,101-38,099,310,912)          | 32,693,984,834<br>(29,074,886,161-37,120,648,975)          | 31,995,446,557<br>(28,450,805,828-36,287,194,060)          | 29,137,349,405<br>(25,451,821,627-33,550,486,790)          | 27,582,856,244<br>(23,896,842,802-33,241,241,203)          | 28,148,645,339<br>(24,224,868,158-33,139,228,498)          |
|                |          | 125,509,534,272<br>(112,600,916,275-140,431,186,029)       | 120,859,307,073<br>(107,496,065,031-136,093,047,796)       | 120,918,991,148<br>(106,650,732,090-136,640,034,253)       | 115,173,779,343<br>(100,756,147,351-131,538,144,570)       | 116,814,671,464<br>(101,611,525,832-134,037,055,294)       | 117,628,519,121<br>(101,538,894,249-135,696,905,369)       |
| Norway         | Group I  | 7,524,469,067<br>(6,831,143,937-8,382,618,644)             | 6,636,888,607<br>(5,881,629,428-7,585,282,156)             | 6,106,122,761<br>(5,346,282,937-7,108,424,445)             | 5,710,322,856<br>(4,915,718,117-6,697,193,917)             | 5,618,084,458<br>(4,758,169,203-6,729,688,586)             | 5,503,483,900<br>(4,578,963,851-6,645,677,529)             |
|                |          | 104,245,613,775<br>(93,068,663,100-116,806,936,964)        | 102,948,357,430<br>(91,183,091,322-116,062,261,806)        | 99,569,129,774<br>(91,196,800,768-117,412,698,581)         | 99,374,455,322<br>(86,547,571,947-113,573,927,390)         | 101,480,329,632<br>(88,202,015,023-116,523,122,651)        | 103,182,881,616<br>(88,561,772,900-118,689,072,816)        |
| Norway         | Injuries | 12,739,451,430<br>(12,408,317,212-15,362,256,837)          | 11,274,061,036<br>(10,108,425,860-12,776,805,962)          | 11,243,738,613<br>(10,008,227,884-12,714,620,744)          | 10,889,001,165<br>(8,896,360,336-11,595,151,322)           | 9,716,257,375<br>(8,525,397,626-11,208,137,051)            | 9,842,153,605<br>(7,796,273,395-10,395,104,450)            |
|                |          | 317,234,865,652<br>(286,641,653,093-352,776,931,523)       | 312,681,139,125<br>(284,500,725,978-352,511,422,861)       | 312,414,483,706<br>(280,434,555,029-350,408,984,952)       | 299,015,456,243<br>(265,490,324,334-338,196,741,741)       | 288,074,762,991<br>(254,236,597,079-328,055,674,911)       | 286,494,410,720<br>(250,818,863,960-327,101,518,847)       |
| Portugal       | Group I  | 21,892,502,595<br>(20,001,505,955-24,444,642,854)          | 24,405,861,393<br>(22,472,257,335-26,992,136,568)          | 24,508,287,155<br>(22,478,285,839-27,240,012,316)          | 21,933,837,200<br>(19,891,914,510-24,658,257,500)          | 19,514,564,641<br>(17,437,443,708-22,250,255,784)          | 18,092,890,403<br>(15,950,416,536-20,971,814,145)          |
|                |          | 249,362,016,336<br>(224,185,761,280-278,613,310,208)       | 250,721,448,207<br>(224,773,492,581-281,285,695,814)       | 252,800,089,484<br>(225,491,926,182-284,819,319,924)       | 247,612,096,827<br>(218,798,684,472-281,135,051,447)       | 243,602,167,225<br>(213,683,520,051-277,455,110,838)       | 245,517,019,004<br>(214,255,060,570-281,710,535,355)       |
| Portugal       | Injuries | 45,980,346,721<br>(41,739,051,157-51,056,235,775)          | 40,553,829,525<br>(36,577,435,316-45,435,719,041)          | 35,106,107,067<br>(31,339,583,715-42,740,045,691)          | 29,469,522,210<br>(25,862,697,518-33,756,178,972)          | 24,958,031,125<br>(21,780,817,134-28,929,980,362)          | 22,884,501,342<br>(19,841,650,292-26,781,782,616)          |
|                |          | 1,050,199,051,379<br>(935,074,327,998-1,182,144,826,707)   | 1,060,910,792,156<br>(942,275,422,881-1,196,743,826,612)   | 1,053,481,362,392<br>(929,746,218,244-1,196,207,540,690)   | 1,077,429,950,103<br>(945,065,475,354-1,230,833,040,187)   | 1,070,861,869,888<br>(930,608,986,407-1,233,104,412,999)   | 1,102,129,695,695<br>(952,653,113,990-1,270,806,762,918)   |
| Spain          | Group I  | 73,579,536,149<br>(64,306,140,944-84,767,915,106)          | 84,699,436,096<br>(75,987,422,221-96,060,404,793)          | 62,816,257,019<br>(54,315,296,398-74,263,276,784)          | 63,464,035,162<br>(54,285,438,380-75,644,580,390)          | 60,388,308,528<br>(50,447,560,280-73,774,152,772)          | 58,140,841,913<br>(47,582,536,763-71,712,608,448)          |
|                |          | 848,359,997,271<br>(756,888,022,485-954,080,623,719)       | 865,750,142,350<br>(768,848,968,716-976,544,757,635)       | 883,696,830,659<br>(782,337,429,303-999,848,332,391)       | 915,274,286,748<br>(806,095,804,594-1,040,038,869,283)     | 927,394,059,958<br>(808,155,981,135-1,062,196,390,660)     | 964,292,503,876<br>(835,602,457,494-1,106,974,181,310)     |
| Spain          | Injuries | 128,259,517,960<br>(115,017,569,692-144,512,142,860)       | 110,461,213,709<br>(97,576,568,413-126,225,268,417)        | 106,968,274,714<br>(94,260,863,343-122,429,028,174)        | 98,691,628,193<br>(85,951,143,511-115,168,723,523)         | 83,079,501,397<br>(70,689,358,492-98,856,648,964)          | 79,725,893,907<br>(69,912,605,529-95,727,998,851)          |
|                |          | 246,672,533,302<br>(220,805,359,928-275,744,007,976)       | 238,298,629,169<br>(212,044,460,398-268,317,251,487)       | 234,065,278,677<br>(207,150,081,043-265,512,001,151)       | 231,034,918,587<br>(203,332,341,587-262,476,072,548)       | 228,473,172,040<br>(199,452,192,259-260,610,015,474)       | 236,046,229,924<br>(205,721,181,106-269,482,077,547)       |
| Sweden         | Group I  | 12,781,325,993<br>(11,344,371,248-14,714,760,622)          | 10,883,863,461<br>(10,275,565,000-13,011,339,053)          | 10,803,863,461<br>(9,131,747,739-13,056,097,866)           | 10,403,573,727<br>(8,773,896,246-12,724,351,952)           | 10,390,588,845<br>(8,621,025,321-12,675,160,682)           | 10,354,768,522<br>(8,511,915,423-12,718,439,343)           |
|                |          | 201,925,166,612<br>(188,368,727,337-235,558,935,889)       | 205,382,433,975<br>(182,365,162,258-230,796,788,651)       | 204,286,809,023<br>(180,386,186,587-230,573,725,188)       | 201,742,210,424<br>(177,871,739,669-229,050,819,461)       | 200,192,588,880<br>(175,045,251,031-227,769,801,178)       | 207,923,274,902<br>(181,128,657,109-232,032,337,425)       |
| Sweden         | Injuries | 22,966,040,696<br>(20,753,328,369-25,613,945,002)          | 21,084,382,799<br>(18,878,525,832-23,777,856,554)          | 19,514,036,193<br>(17,376,347,956-22,277,435,353)          | 18,884,134,436<br>(16,739,649,730-21,597,892,281)          | 17,890,024,316<br>(15,715,904,395-20,705,031,510)          | 17,768,187,580<br>(15,572,194,853-20,030,630,910)          |
|                |          | 189,291,963,309<br>(168,140,112,569-213,742,386,231)       | 189,143,358,634<br>(167,477,607,078-214,709,413,753)       | 181,710,069,590<br>(160,665,369,327-209,877,539,006)       | 179,464,215,476<br>(155,768,073,033-206,366,152,851)       | 181,978,339,824<br>(157,764,258,888-211,414,067,605)       | 188,363,751,562<br>(161,797,233,566-218,426,191,365)       |
| Switzerland    | Group I  | 10,208,790,233<br>(9,032,665,131-11,752,312,956)           | 11,714,089,486<br>(10,406,286,240-13,329,655,099)          | 9,072,844,383<br>(7,813,297,968-10,760,511,176)            | 8,121,323,529<br>(6,879,846,104-9,811,589,359)             | 8,009,747,594<br>(6,735,529,806-9,735,562,512)             | 8,113,976,808<br>(6,695,099,174-9,944,391,245)             |
|                |          | 150,740,811,339<br>(133,386,800,996-170,108,181,105)       | 154,087,102,482<br>(135,928,849,739-174,736,556,422)       | 153,936,157,971<br>(134,388,555,152-175,499,326,244)       | 153,198,893,518<br>(132,909,548,245-176,287,203,499)       | 157,352,431,204<br>(135,729,884,527-181,677,223,284)       | 163,740,086,111<br>(140,664,897,583-189,833,161,310)       |
| Switzerland    | Injuries | 28,342,361,737<br>(25,265,027,848-32,066,118,343)          | 23,146,666,666<br>(20,638,226,197-26,602,411,972)          | 20,701,067,237<br>(18,199,734,049-23,670,136,655)          | 18,143,998,429<br>(15,800,938,057-21,008,572,050)          | 16,616,161,035<br>(14,343,810,584-19,626,510,322)          | 16,509,688,644<br>(14,240,694,418-19,550,454,455)          |
|                |          | 1,757,306,446,355<br>(1,587,976,190,344-1,953,133,533,817) | 1,704,949,041,379<br>(1,530,298,922,169-1,908,114,419,702) | 1,655,802,790,361<br>(1,475,148,525,240-1,860,536,986,549) | 1,606,895,200,270<br>(1,422,264,060,559-1,821,064,597,395) | 1,576,615,505,131<br>(1,387,923,002,984-1,794,141,964,815) | 1,599,271,121,470<br>(1,401,958,676,200-1,824,824,769,177) |
| United Kingdom | Group I  | 117,472,516,595<br>(106,552,062,811-132,193,673,171)       | 122,969,517,070<br>(111,767,414,792-137,959,399,891)       | 115,651,337,382<br>(104,224,457,102-131,032,932,919)       | 106,800,268,231<br>(94,097,                                |                                                            |                                                            |

Appendix Table 3. DALYs for all causes and level 1 cause groups by location for 1990 - 2015, both sexes combined.

|                                                  | Cause      | 1990                                                          | 1995                                                          | 2000                                                          | 2005                                                          | 2010                                                          | 2015                                                          |
|--------------------------------------------------|------------|---------------------------------------------------------------|---------------------------------------------------------------|---------------------------------------------------------------|---------------------------------------------------------------|---------------------------------------------------------------|---------------------------------------------------------------|
| Northern Ireland                                 | All causes | 45,645,353,807<br>(41,215,909,872-50,704,073,541)             | 44,445,345,394<br>(39,851,558,254-49,722,203,691)             | 43,251,714,195<br>(38,353,127,187-48,872,016,910)             | 43,904,435,856<br>(38,325,585,808-49,673,364,073)             | 45,362,930,554<br>(40,012,172,943-51,325,545,115)             | 45,157,217,462<br>(39,570,232,410-51,248,968,406)             |
|                                                  | Group 1    | 3,906,713,483<br>(3,595,300,282-4,358,623,903)                | 3,817,585,799<br>(3,463,865,657-4,285,620,406)                | 3,374,862,944<br>(3,011,069,194-3,837,211,975)                | 3,111,871,585<br>(2,765,352,611-3,563,463,002)                | 3,031,829,190<br>(2,689,143,582-3,469,992,292)                | 2,916,118,439<br>(2,535,095,266-3,410,816,576)                |
| Northern Ireland                                 | NCD        | 37,391,482,187<br>(33,656,101,578-41,583,603,019)             | 36,517,167,795<br>(32,519,400,985-40,969,824,070)             | 35,918,111,683<br>(31,739,368,069-40,633,609,982)             | 36,640,565,497<br>(32,309,783,149-41,522,183,355)             | 37,576,803,754<br>(33,118,355,747-42,625,607,636)             | 38,452,611,888<br>(33,746,063,954-43,664,031,355)             |
|                                                  | Injuries   | 4,347,158,227<br>(3,905,022,728-4,918,414,669)                | 4,110,591,800<br>(3,659,491,956-4,652,375,458)                | 3,958,739,568<br>(3,501,919,944-4,522,205,635)                | 4,151,998,774<br>(3,637,591,905-4,757,171,636)                | 4,754,297,611<br>(4,059,207,917-5,524,197,231)                | 3,788,447,136<br>(3,275,414,416-4,454,209,024)                |
| Scotland                                         | All causes | 173,089,178,122<br>(157,283,659,265-191,274,508,628)          | 167,539,844,463<br>(150,874,443,319-186,358,857,327)          | 162,598,182,673<br>(146,235,276,312-181,390,345,321)          | 157,913,023,541<br>(140,817,367,644-176,688,811,088)          | 153,355,006,594<br>(136,239,800,609-173,025,642,182)          | 153,986,187,764<br>(136,317,537,115-173,287,472,149)          |
|                                                  | Group 1    | 10,475,521,258<br>(9,567,417,036-11,627,963,283)              | 10,084,034,405<br>(9,188,910,284-11,240,996,478)              | 8,941,787,889<br>(8,058,867,134-10,069,810,745)               | 8,504,082,971<br>(7,644,437,772-9,612,736,434)                | 7,881,539,521<br>(6,948,145,629-8,952,940,129)                | 7,581,539,521<br>(6,674,421,353-8,710,385,105)                |
| Scotland                                         | NCD        | 147,630,351,741<br>(133,979,319,419-163,057,182,884)          | 143,438,336,073<br>(129,268,556,691-159,267,844,971)          | 140,261,894,519<br>(126,247,270,918-156,206,086,637)          | 137,069,306,793<br>(121,968,734,026-153,166,748,297)          | 134,261,759,059<br>(119,009,057,928-151,051,884,293)          | 135,732,916,994<br>(119,442,977,632-153,075,148,572)          |
|                                                  | Injuries   | 14,983,305,123<br>(13,408,863,340-17,005,870,733)             | 14,016,973,984<br>(12,495,215,928-15,896,162,385)             | 13,394,500,265<br>(11,901,732,579-15,260,415,651)             | 13,239,563,777<br>(11,843,429,135-14,193,840,782)             | 11,465,207,074<br>(9,986,652,910-13,274,048,035)              | 10,671,732,049<br>(9,272,038,279-12,482,024,828)              |
| Wales                                            | All causes | 92,638,783,526<br>(83,562,388,544-102,861,333,606)            | 91,021,799,171<br>(81,791,017,408-101,387,661,956)            | 88,437,962,344<br>(79,110,777,873-99,102,740,115)             | 86,537,886,176<br>(76,908,992,103-97,564,164,863)             | 85,313,527,162<br>(75,348,407,651-96,499,128,235)             | 86,484,336,348<br>(76,016,471,591-97,869,428,579)             |
|                                                  | Group 1    | 5,889,541,783<br>(5,247,316,919-6,667,465,248)                | 6,233,187,780<br>(5,576,273,609-7,079,217,347)                | 5,953,122,800<br>(5,203,767,968-6,728,535,354)                | 5,438,819,712<br>(4,766,723,932-6,217,396,658)                | 5,247,165,128<br>(4,581,605,887-6,045,355,199)                | 5,166,015,937<br>(4,508,549,996-5,988,170,005)                |
| Wales                                            | NCD        | 80,009,555,400<br>(72,156,641,125-88,716,419,190)             | 78,372,257,154<br>(70,320,064,128-87,258,296,954)             | 76,267,968,763<br>(68,215,312,055-85,312,426,519)             | 75,171,181,222<br>(66,801,057,003-84,441,266,672)             | 74,407,271,572<br>(65,624,966,089-83,931,695,382)             | 75,979,926,217<br>(66,735,372,778-85,877,838,492)             |
|                                                  | Injuries   | 6,739,686,343<br>(5,932,501,108-7,738,382,939)                | 6,416,354,237<br>(5,614,625,670-7,386,340,107)                | 6,216,870,581<br>(5,415,324,676-7,214,494,438)                | 5,927,885,443<br>(5,104,648,766-6,943,016,577)                | 5,659,990,462<br>(4,840,671,853-6,682,855,989)                | 5,338,394,193<br>(4,575,064,929-6,325,267,241)                |
| Southern Latin America                           | All causes | 1,421,479,234,651<br>(1,300,747,348,236-1,562,889,153,740)    | 1,429,902,066,541<br>(1,298,737,906,044-1,580,125,899,957)    | 1,452,159,308,250<br>(1,310,204,154,190-1,615,367,544,370)    | 1,471,293,899,389<br>(1,320,779,919,026-1,642,084,216,030)    | 1,539,555,062,841<br>(1,379,297,558,270-1,721,327,538,341)    | 1,601,324,453,925<br>(1,425,849,850,417-1,799,373,354,916)    |
|                                                  | Group 1    | 246,993,844,235<br>(231,232,389,814-265,726,315,981)          | 220,584,261,847<br>(205,398,183,975-239,875,428,870)          | 205,088,880,100<br>(188,105,387,027-221,295,137,311)          | 191,839,795,326<br>(176,387,872,458-211,498,971,907)          | 186,296,987,966<br>(170,446,321,998-202,487,989,053)          | 175,228,792,905<br>(159,515,190,095-194,545,565,611)          |
| Southern Latin America                           | NCD        | 1,004,608,802,177<br>(906,791,580,968-1,144,572,528,416)      | 1,030,603,879,071<br>(924,838,573,186-1,151,691,023,797)      | 1,067,377,378,637<br>(952,444,205,970-1,197,975,693,114)      | 1,106,464,201,180<br>(982,257,964,637-1,246,656,737,909)      | 1,172,337,187,363<br>(1,038,793,099,391-1,322,904,978,239)    | 1,246,354,875,975<br>(1,100,069,625,415-1,410,773,153,722)    |
|                                                  | Injuries   | 170,776,588,241<br>(158,867,875,172-184,830,170,554)          | 178,714,125,623<br>(165,932,912,759-194,067,383,412)          | 181,697,049,513<br>(168,534,886,514-197,789,526,628)          | 172,989,902,883<br>(159,724,944,173-189,974,570,803)          | 180,950,887,842<br>(167,072,479,848-199,100,405,246)          | 179,740,785,046<br>(164,483,333,375-199,219,389,644)          |
| Argentina                                        | All causes | 986,620,944,272<br>(904,651,746,574-1,082,544,104,832)        | 1,000,999,313,057<br>(912,733,722,151-1,102,824,401,953)      | 1,027,543,627,447<br>(931,726,917,657-1,137,466,129,833)      | 1,032,384,564,672<br>(931,177,821,978-1,146,817,926,921)      | 1,065,967,867,657<br>(958,835,153,416-1,186,768,120,105)      | 1,103,848,848,953<br>(987,422,101,178-1,238,012,377,735)      |
|                                                  | Group 1    | 180,366,773,609<br>(168,619,963,786-195,533,990,990)          | 167,603,066,251<br>(155,824,286,355-181,962,446,528)          | 150,118,684,911<br>(147,656,917,798-172,925,888,590)          | 152,891,940,445<br>(141,094,795,159-167,177,340,763)          | 148,000,687,957<br>(135,925,014,474-162,588,638,946)          | 138,495,670,590<br>(126,547,159,129-153,184,111,529)          |
| Argentina                                        | NCD        | 696,619,939,079<br>(630,452,072,385-770,940,999,469)          | 716,270,134,702<br>(645,685,170,609-797,080,081,927)          | 742,939,944,133<br>(665,902,646,545-829,038,708,346)          | 760,555,664,269<br>(678,250,819,075-853,659,456,227)          | 797,219,523,570<br>(709,754,015,721-896,981,784,540)          | 842,650,441,855<br>(745,711,879,520-952,216,064,051)          |
|                                                  | Injuries   | 109,634,231,585<br>(101,504,788,816-118,859,786,764)          | 117,126,112,103<br>(108,429,195,194-127,701,985,118)          | 120,514,683,314<br>(116,278,590,956-136,591,760,808)          | 118,936,959,958<br>(109,654,459,800-130,662,225,399)          | 122,702,736,580<br>(111,283,624,706-133,118,249,147)          | 122,702,736,580<br>(112,321,973-136,231,779,634)              |
| Chile                                            | All causes | 337,360,379,513<br>(306,150,390,778-372,948,370,901)          | 328,578,990,532<br>(294,441,516,264-367,457,591,616)          | 327,042,585,160<br>(289,338,534,274-369,841,965,071)          | 344,068,257,385<br>(303,823,550,943-390,517,171,584)          | 378,815,745,394<br>(333,788,193,340-429,208,214,448)          | 401,342,362,414<br>(351,631,959,391-454,136,669,117)          |
|                                                  | Group 1    | 53,570,161,170<br>(50,343,875,267-57,573,025,969)             | 41,255,375,085<br>(38,226,641,524-45,080,598,585)             | 33,993,605,811<br>(30,846,130,909-37,703,995,744)             | 33,793,607,071<br>(26,540,013,502-33,685,091,998)             | 29,861,969,772<br>(26,677,795,509-33,984,148,951)             | 28,776,730,951<br>(25,562,945,481-32,961,296,269)             |
| Chile                                            | NCD        | 233,228,452,445<br>(207,468,161,409-262,224,064,997)          | 237,604,663,349<br>(209,480,675,527-269,404,895,171)          | 248,569,277,813<br>(216,652,510,791-284,135,677,983)          | 271,111,224,643<br>(236,658,221,320-310,415,291,904)          | 299,781,346,507<br>(262,286,044,002-342,121,664,833)          | 326,392,301,303<br>(283,147,650,558-371,903,108,879)          |
|                                                  | Injuries   | 50,561,765,897<br>(47,559,791,430-54,363,173,550)             | 49,717,952,138<br>(46,380,312,640-53,487,267,640)             | 44,679,701,277<br>(41,513,619,441-48,560,354,781)             | 43,839,854,598<br>(40,187,882,014-47,520,938,489)             | 49,172,429,115<br>(44,479,578,586-54,979,603,745)             | 46,172,330,160<br>(41,444,107,988-51,557,040,053)             |
| Uruguay                                          | All causes | 97,439,247,973<br>(89,495,732,015-107,123,759,179)            | 100,251,709,274<br>(91,709,444,029-110,165,857,042)           | 97,488,086,177<br>(88,697,863,197-107,502,578,475)            | 94,754,101,885<br>(85,687,359,105-105,059,663,079)            | 94,867,725,245<br>(85,401,798,063-105,355,574,659)            | 96,043,411,526<br>(86,354,928,152-107,078,091,016)            |
|                                                  | Group 1    | 12,149,287,738<br>(11,250,168,249-13,287,884,771)             | 11,716,268,135<br>(10,826,508,389-12,791,996,902)             | 10,163,342,412<br>(9,257,183,703-11,298,127,210)              | 9,377,834,998<br>(8,426,957,801-10,575,200,584)               | 8,395,661,938<br>(7,457,968,108-9,546,016,269)                | 7,948,320,252<br>(6,953,755,966-9,168,538,065)                |
| Uruguay                                          | NCD        | 74,716,603,512<br>(68,068,902,734-82,365,766,724)             | 76,674,110,860<br>(69,558,910,783-84,705,521,027)             | 75,802,212,118<br>(68,431,438,874-84,089,172,387)             | 74,722,210,883<br>(67,175,521,481-83,178,037,661)             | 75,265,949,708<br>(67,415,224,687-84,030,420,842)             | 77,237,783,160<br>(69,035,608,131-86,373,523,777)             |
|                                                  | Injuries   | 10,573,356,723<br>(9,768,118,861-11,569,367,698)              | 11,861,330,280<br>(11,032,437,220-12,858,101,805)             | 11,522,531,647<br>(10,722,979,873-12,541,589,768)             | 10,654,056,003<br>(9,856,316,456-11,620,593,002)              | 11,026,113,598<br>(10,225,112,531-12,072,923,900)             | 10,857,308,114<br>(10,005,913,816-11,994,471,860)             |
| Central Europe, Eastern Europe, and Central Asia | All causes | 15,744,933,780,975<br>(14,507,193,284,417-17,138,869,801,941) | 18,550,227,155,159<br>(17,013,959,253,315-19,869,190,408,249) | 17,445,674,699,501<br>(16,199,458,716,513-18,880,981,101,361) | 17,462,518,725,614<br>(16,213,525,542,669-18,869,113,090,696) | 15,577,448,152,755<br>(14,321,181,972,641-17,013,490,780,201) | 15,306,856,696,659<br>(13,971,909,936,579-16,795,661,556,075) |
|                                                  | Group 1    | 2,231,873,084,911<br>(2,094,895,745,197-2,405,927,555,070)    | 2,121,053,853,278<br>(1,980,017,225,409-2,293,964,828,122)    | 1,860,291,418,709<br>(1,732,079,332,985-2,014,302,268,499)    | 1,707,857,485,412<br>(1,583,096,365,362-1,864,560,034,830)    | 1,509,563,254,269<br>(1,385,094,325,521-1,658,577,295,682)    | 1,355,291,093,888<br>(1,228,876,099,025-1,509,077,293,745)    |
| Central Europe, Eastern Europe, and Central Asia | NCD        | 11,254,094,914,599<br>(10,281,803,818,959-12,331,735,135,236) | 13,145,912,586,305<br>(12,165,802,964,891-14,238,932,173,166) | 12,344,489,580,271<br>(11,919,546,277,583-14,065,838,390,398) | 12,588,262,512<br>(12,217,264,653,779-14,381,163,381,020)     | 12,189,932,061,400<br>(11,102,630,088,490-13,328,025,769,114) | 12,189,932,061,400<br>(11,058,997,740,473-13,456,207,646,023) |
|                                                  | Injuries   | 2,258,965,778,604<br>(2,133,319,708,586-2,399,269,498,312)    | 2,983,260,751,576<br>(2,845,603,558,181-3,144,079,159,202)    | 2,644,979,086,233<br>(2,517,890,996,637-2,786,617,731,966)    | 2,510,171,659,481<br>(2,393,649,765,225-2,649,061,799,004)    | 1,909,082,633,974<br>(1,808,926,117,073-2,029,824,174,765)    | 1,763,633,541,371<br>(1,658,462,269,427-1,896,082,307,576)    |
| Eastern Europe                                   | All causes | 8,737,330,924,323<br>(8,028,963,582,013-9,536,363,051,483)    | 9,017,818,185,569<br>(8,209,685,089,264-10,827,308,123,033)   | 10,974,809,599,462<br>(10,023,378,547,249-11,557,535,520,090) | 10,904,074,424,406<br>(10,206,708,621,913-11,694,924,457,430) | 9,098,775,579,020<br>(8,522,607,871,668-10,007,106,412,652)   | 9,098,775,579,020<br>(8,337,747,999,151-9,939,137,999,657)    |
|                                                  | Group 1    | 760,779,671,070<br>(685,420,955,625-854,744,058,200)          | 792,490,310,535<br>(714,399,010,226-883,473,634,606)          | 827,291,358,069<br>(757,867,692,799-918,326,424,084)          | 827,291,358,069<br>(758,012,688,790-914,176,653,156)          | 722,758,226,885<br>(651,604,632-808,480,485,067)              | 675,623,852,051<br>(605,612,487,444-766,768,802,878)          |
| Eastern Europe                                   | NCD        | 6,542,588,779,275<br>(5,991,645,875,186-7,155,054,864,732)    | 8,161,549,328,110<br>(7,613,196,855,737-8,781,207,052,591)    | 8,004,373,273,955<br>(7,439,536,077,282-8,641,961,174,397)    | 8,246,083,813,704<br>(7,688,850,186,233-8,770,274,884,805)    | 7,207,819,551,783<br>(6,629,989,299,335-7,855,856,178,551)    | 7,207,819,551,783<br>(6,600,3                                 |

**Appendix Table 3. DALYs for all causes and level 1 cause groups by location for 1990 - 2015, both sexes combined.**

|                        | Cause      | 1990                                  | 1995                                  | 2000                                  | 2005                                  | 2010                                  | 2015                                  |
|------------------------|------------|---------------------------------------|---------------------------------------|---------------------------------------|---------------------------------------|---------------------------------------|---------------------------------------|
| Estonia                | Injuries   | 11 380 391 748                        | 12 822 447 774                        | 9 040 815 956                         | 6 921 041 429                         | 4 349 109 409                         | 3 584 863 283                         |
|                        |            | (10 696 433 577-12 135 066 674)       | (12 173 254 820-13 525 633 860)       | (8 516 856 157-9 640 824 013)         | (6 511 656 381-7 399 468 061)         | (4 021 240 128-4 761 366 330)         | (3 246 647 041-4 016 525 638)         |
| Latvia                 | All causes | 108 178 426 811                       | 121 186 796 861                       | 95 272 346 811                        | 95 788 568 787                        | 77 804 238 995                        | 77 804 585 803                        |
|                        |            | (99 914 159 937-117 590 614 179)      | (113 325 237 722-130 312 074 102)     | (90 561 446 868-107 091 647 305)      | (88 086 109 600-104 325 023 947)      | (74 822 963 534-90 226 079 561)       | (70 321 368 319-86 153 731 763)       |
| Latvia                 | Group I    | 7 311 435 587                         | 7 330 092 378                         | 5 548 079 134                         | 4 859 624 378                         | 4 211 127 281                         | 3 663 244 797                         |
|                        |            | (6 533 948 075-8 228 528 963)         | (6 614 898 121-8 205 934 578)         | (4 946 024 044-6 331 237 640)         | (4 332 629 509-5 539 743 280)         | (3 682 009 606-4 855 435 719)         | (3 126 138 244-4 339 342 844)         |
| Latvia                 | NCD        | 80 564 217 168                        | 89 539 196 879                        | 76 338 764 603                        | 77 070 977 843                        | 68 243 228 818                        | 65 778 186 854                        |
|                        |            | (73 830 224 194-87 967 626 362)       | (83 073 812 823-96 640 066 372)       | (69 095 783 378-83 551 459 308)       | (70 724 412 544-84 250 238 002)       | (61 873 363 137-75 156 460 698)       | (59 204 286 128-73 010 487 146)       |
| Latvia                 | Injuries   | 20 302 774 055                        | 24 317 507 604                        | 16 385 503 074                        | 13 857 966 575                        | 9 663 886 895                         | 8 363 154 153                         |
|                        |            | (19 221 871 121-21 585 315 540)       | (23 147 504 090-25 584 392 675)       | (15 534 732 334-17 467 246 781)       | (13 080 699 654-14 764 784 564)       | (9 048 741 122-10 409 069 264)        | (7 761 032 453-9 148 259 583)         |
| Lithuania              | All causes | 130 697 816 530                       | 148 504 812 153                       | 127 328 060 145                       | 132 481 472 716                       | 118 511 336 928                       | 111 406 704 952                       |
|                        |            | (119 435 965 268-143 191 093 651)     | (137 330 699 879-161 266 304 199)     | (116 290 998 535-140 014 555 559)     | (121 667 239 293-144 725 970 013)     | (107 901 144 470-130 447 194 130)     | (100 713 162 237-125 523 457)         |
| Lithuania              | Group I    | 8 213 120 782                         | 8 859 736 275                         | 7 113 539 978                         | 6 811 156 191                         | 5 837 876 763                         | 5 950 618 355                         |
|                        |            | (7 217 418 324-9 431 397 139)         | (7 900 587 482-10 072 975 675)        | (6 291 651 980-8 225 622 808)         | (6 011 764 660-7 839 345 009)         | (5 104 237 169-6 799 075 746)         | (4 261 985 821-5 775 439 449)         |
| Lithuania              | NCD        | 97 321 484 814                        | 110 069 023 149                       | 97 148 980 148                        | 102 977 937 379                       | 95 427 535 226                        | 91 314 096 860                        |
|                        |            | (88 228 136 623-107 303 050 476)      | (101 020 300 164-120 198 950 816)     | (88 083 678 848-107 210 045 798)      | (93 875 791 694-113 131 530 477)      | (86 476 763 449-105 627 070 195)      | (81 910 711 926-101 300 423 344)      |
| Lithuania              | Injuries   | 25 163 210 934                        | 29 576 052 729                        | 23 065 540 019                        | 22 692 379 146                        | 17 245 924 939                        | 15 141 589 557                        |
|                        |            | (23 795 872 891-26 726 263 481)       | (28 275 153 991-31 117 965 465)       | (21 852 637 437-24 521 151 430)       | (21 593 172 489-24 043 022 700)       | (16 331 719 691-18 414 861 353)       | (14 197 191 466-16 295 725 912)       |
| Moldova                | All causes | 165 783 578 545                       | 187 715 371 812                       | 154 558 521 877                       | 151 442 773 835                       | 147 259 610 977                       | 127 316 282 357                       |
|                        |            | (152 863 380 180-180 334 833 260)     | (174 927 302 706-201 922 716 148)     | (142 125 879 551-168 331 577 704)     | (139 351 122 422-165 092 219 471)     | (135 225 535 281-160 640 791 890)     | (114 900 205 785-140 923 026 995)     |
| Moldova                | Group I    | 21 450 703 122                        | 21 796 646 374                        | 18 447 469 480                        | 17 605 278 837                        | 12 605 278 837                        | 9 693 378 937                         |
|                        |            | (18 874 553 522-24 362 689 073)       | (19 388 349 142-24 738 027 309)       | (16 487 723 758-20 900 765 276)       | (15 623 203 717-15 311 591 429)       | (11 217 841 664-14 441 315 504)       | (8 293 720 632-11 400 987 633)        |
| Moldova                | NCD        | 117 115 227 261                       | 137 256 384 155                       | 115 898 860 398                       | 119 931 522 481                       | 118 588 936 466                       | 105 017 414 006                       |
|                        |            | (107 411 681 331-128 210 968 533)     | (127 205 994 938-148 357 199 314)     | (105 813 647 983-126 509 521 954)     | (110 012 712 329-131 078 062 804)     | (108 516 008 268-129 858 812 105)     | (94 382 145 762-116 439 609 797)      |
| Moldova                | Injuries   | 27 217 648 161                        | 28 662 341 283                        | 20 521 191 999                        | 17 990 967 937                        | 16 065 395 674                        | 12 605 489 414                        |
|                        |            | (25 481 629 429-29 047 051 172)       | (27 048 939 160-30 423 279 909)       | (19 292 487 785-21 969 550 160)       | (16 930 617 146-19 207 703 799)       | (15 152 804 721-17 146 719 656)       | (11 652 236 978-13 661 089 878)       |
| Russia                 | All causes | 5 862 322 642 489                     | 7 603 579 511 324                     | 7 541 144 290 038                     | 7 697 411 671 799                     | 6 457 819 763 621                     | 6 334 867 968 331                     |
|                        |            | (5 388 403 449 439-6 404 011 979 590) | (7 124 617 042 628-8 152 913 933 012) | (6 054 743 349 710 816 974 681 155)   | (7 217 819 604 178-8 241 256 668 204) | (5 973 170 638 177-7 094 556 582 062) | (5 799 490 952 783-6 938 210 254 097) |
| Russia                 | Group I    | 545 798 097 710                       | 570 618 476 769                       | 609 809 173 808                       | 608 149 528 485                       | 534 500 126 954                       | 515 669 971 650                       |
|                        |            | (488 042 468 033-621 465 831 577)     | (508 465 980 184-641 683 938 236)     | (555 329 070 755-680 631 890 070)     | (552 711 728 931-676 424 432 402)     | (477 661 417 393-602 784 021 393)     | (455 985 587 799-592 039 123 302)     |
| Russia                 | NCD        | 4 320 387 066 379                     | 5 528 971 397 237                     | 5 516 818 434 176                     | 5 695 188 854 578                     | 4 944 081 891 500                     | 4 952 359 074 489                     |
|                        |            | (3 958 054 774 126-4 719 744 455 569) | (5 165 165 064 137-5 944 040 428 417) | (5 132 432 301 376-5 947 889 052 264) | (5 319 858 602 198-6 115 278 147 428) | (4 550 785 799 747-5 370 311 434 779) | (4 517 522 044 003-5 437 490 238 891) |
| Russia                 | Injuries   | 996 137 478 400                       | 1 503 989 637 318                     | 1 414 516 862 053                     | 1 394 073 288 742                     | 979 587 745 168                       | 866 838 922 191                       |
|                        |            | (938 757 932 672-1 059 557 356 743)   | (1 438 965 127 999-1 577 273 545 221) | (1 349 821 546 983-1 493 153 671 275) | (1 323 964 986 249-1 465 161 418 408) | (929 435 385 181-1 036 343 876 587)   | (813 324 850 811-930 567 113 137)     |
| Ukraine                | All causes | 2 033 729 128 085                     | 2 461 557 066 254                     | 2 319 432 393 993                     | 2 342 190 308 066                     | 1 965 358 356 312                     | 1 992 927 225 232                     |
|                        |            | (1 872 002 655 334-2 211 869 110 028) | (2 300 987 546 549-2 639 727 270 414) | (2 161 879 024 526-2 491 552 578 842) | (2 190 019 608 259-2 510 344 100 812) | (1 816 567 270 962-2 131 842 470 207) | (1 831 265 588 671-2 171 047 103 747) |
| Ukraine                | Group I    | 144 525 153 446                       | 154 015 908 854                       | 161 174 565 715                       | 170 013 187 768                       | 144 323 095 726                       | 122 426 127 825                       |
|                        |            | (128 245 778 101-163 069 052 893)     | (140 196 634 276-170 692 988 989)     | (146 964 678 549-176 333 302 341)     | (156 901 417 745-183 918 003 299)     | (133 433 642 017-157 144 026 185)     | (110 719 011 805-137 157 938 097)     |
| Ukraine                | NCD        | 1 595 536 930 902                     | 1 619 619 041 363                     | 1 811 655 247 979                     | 1 866 344 410 697                     | 1 619 478 203 241                     | 1 653 578 466 572                     |
|                        |            | (1 462 465 713 361-1 742 969 151 851) | (1 783 295 875 089-2 062 894 530 018) | (1 679 258 639 001-1 958 746 825 643) | (1 737 710 499 400-2 010 221 807 799) | (1 488 768 460 880-1 765 672 737 301) | (1 513 177 392 530-1 813 005 495 853) |
| Ukraine                | Injuries   | 293 607 043 737                       | 390 922 116 037                       | 346 602 580 299                       | 305 832 709 601                       | 201 557 057 345                       | 216 922 630 835                       |
|                        |            | (276 892 919 971-313 189 929 554)     | (372 305 822 874-411 708 312 759)     | (329 291 176 515-366 413 032 284)     | (291 212 400 963-326 217 906 971 431) | (189 118 957 250-217 304 906 027)     | (195 085 908 521-241 237 174 092)     |
| Central Europe         | All causes | 4 240 823 598 767                     | 4 279 021 883 902                     | 3 900 407 244 576                     | 3 863 964 461 828                     | 3 725 468 264 952                     | 3 590 881 463 424                     |
|                        |            | (3 887 302 702 001-4 640 705 427 798) | (3 925 044 164 445-4 679 969 647 475) | (3 645 390 345 012-4 402 843 342 513) | (3 506 779 722 228-4 269 743 342 666) | (3 365 847 582 298-4 134 820 945 721) | (3 222 008 462 524-4 010 399 079 205) |
| Central Europe         | Group I    | 405 956 701 593                       | 319 604 825 160                       | 251 670 960 995                       | 209 748 677 660                       | 180 288 996 936                       | 157 415 382 405                       |
|                        |            | (375 072 060 928-442 139 087 175)     | (294 765 498 110-351 418 587 405)     | (227 846 520 780-280 859 271 650)     | (188 318 949 348-238 570 329 339)     | (175 507 918 295-207 437 642 119)     | (137 897 522 767-183 068 521 945)     |
| Central Europe         | NCD        | 3 348 847 406 171                     | 3 436 305 688 605                     | 3 344 916 280 820                     | 3 298 760 597 647                     | 3 231 411 083 628                     | 3 151 543 251 796                     |
|                        |            | (3 056 454 606 375-3 671 798 139 519) | (3 135 669 714 548-3 769 966 010 244) | (3 042 863 369 320-3 684 793 029 589) | (2 988 392 719 848-3 648 289 014 481) | (2 912 492 997 202-3 587 217 729 588) | (2 822 593 804 540-3 514 636 477 454) |
| Central Europe         | Injuries   | 486 019 492 003                       | 523 113 370 137                       | 402 820 082 761                       | 354 453 186 512                       | 313 768 194 389                       | 281 922 629 223                       |
|                        |            | (453 706 313 639-524 118 768 821)     | (486 838 500 346-562 176 749 747)     | (374 873 312 342-436 002 994 387)     | (329 680 959 844-384 960 347 088)     | (290 984 082 002-341 872 515 006)     | (259 850 310 955-311 531 495 963)     |
| Albania                | All causes | 92 017 603 439                        | 86 744 926 307                        | 79 156 330 968                        | 73 828 104 526                        | 71 345 307 699                        | 72 418 734 733                        |
|                        |            | (82 931 030 494-102 173 775 198)      | (77 969 385 263-96 366 799 944)       | (70 640 234 532-88 755 979 580)       | (65 387 642 648-83 446 334 814)       | (62 797 507 576-80 787 381 641)       | (63 317 046 398-82 386 489 839)       |
| Albania                | Group I    | 29 321 517 388                        | 22 696 602 442                        | 14 030 512 156                        | 8 989 292 808                         | 6 343 669 084                         | 5 439 164 383                         |
|                        |            | (25 082 864 540-32 920 486 911)       | (19 966 744 997-25 613 294 010)       | (12 165 829 792-16 090 860 355)       | (7 618 267 996-10 592 857 549)        | (5 186 409 916-7 699 607 338)         | (4 369 123 666-6 750 239 639)         |
| Albania                | NCD        | 53 210 650 976                        | 53 789 658 973                        | 56 029 893 800                        | 58 887 509 539                        | 60 091 876 401                        | 62 482 824 463                        |
|                        |            | (46 606 167 245-60 260 726 330)       | (47 197 825 530-60 892 244 483)       | (49 594 349 645-63 320 358 879)       | (52 059 606 692-66 918 371 529)       | (52 761 896 055-68 267 715 890)       | (54 538 606 523-71 211 168 644)       |
| Albania                | Injuries   | 9 485 435 075                         | 10 258 664 892                        | 9 085 925 431                         | 5 951 302 179                         | 4 909 762 214                         | 4 496 745 887                         |
|                        |            | (8 669 467 624-10 359 875 251)        | (9 359 104 132-11 094 556 738)        | (8 169 460 577-9 839 574 701)         | (5 426 638 394-6 556 889 990)         | (4 424 248 587-5 465 422 967)         | (3 968 129 956-5 067 222 929)         |
| Bosnia and Herzegovina | All causes | 125 063 809 514                       | 172 283 901 806                       | 102 341 938 447                       | 102 627 974 540                       | 103 818 640 542                       | 103 781 471 058                       |
|                        |            | (113 187 140 091-138 504 391 437)     | (153 820 246 595-191 710 652 138)     | (91 371 036 438-114 630 249 639)      | (91 155 944 522-115 404 686 329)      | (92 281 541 316-117 078 680 916)      | (91 782 724 750-117 246 093 612)      |
| Bosnia and Herzegovina | Group I    | 14 437 687 825                        | 10 664 503 749                        | 6 764 945 918                         | 5 522 581 512                         | 4 971 908 719                         | 4 423 287 846                         |
|                        |            | (12 893 841 272-16 414 401 358)       | (9 340 350 130-12 156 307 551)        | (5 859 183 387-7 895 046 656)         | (4 660 034 691-6 530 043 026)         | (4 166 018 023-5 936 534 708)         | (3 611 715 508-5 385 646 713)         |
| Bosnia and Herzegovina | NCD        | 93 057 246 152                        | 88 708 006 781                        | 84 778 273 034                        | 87 617 973 557                        | 89 780 760 157                        | 90 901 602 027                        |
|                        |            | (82 976 503 062-103 524 223 600)      | (79 645 584 274-98 492 09             |                                       |                                       |                                       |                                       |

Appendix Table 3. DALYs for all causes and level 1 cause groups by location for 1990 - 2015, both sexes combined.

|                | Cause      | 1990                                                       | 1995                                                       | 2000                                                       | 2005                                                       | 2010                                                       | 2015                                                       |
|----------------|------------|------------------------------------------------------------|------------------------------------------------------------|------------------------------------------------------------|------------------------------------------------------------|------------------------------------------------------------|------------------------------------------------------------|
| Czech Republic | NCD        | 304,387,073,859<br>(279,200,856,079-333,075,177,608)       | 283,681,236,876<br>(257,687,784,323-313,010,270,342)       | 272,576,344,179<br>(246,319,010,694-302,226,327,617)       | 268,155,558,190<br>(240,714,739,064-298,878,976,482)       | 265,943,104,653<br>(237,140,395,888-298,163,615,249)       | 267,387,093,904<br>(236,619,837,788-301,261,210,344)       |
| Czech Republic | Injuries   | 38,283,532,572<br>(35,265,343,118-41,696,128,771)          | 35,601,336,230<br>(32,885,539,360-38,748,526,224)          | 31,456,109,133<br>(29,015,588,762-34,342,988,981)          | 28,361,995,673<br>(26,071,317,668-31,049,145,686)          | 25,030,092,313<br>(22,973,791,592-27,874,879,819)          | 22,239,694,532<br>(20,168,658,631-24,765,128,263)          |
| Hungary        | All causes | 432,412,572,540<br>(400,252,227,631-467,513,146,583)       | 427,164,808,004<br>(395,737,428,749-463,309,540,763)       | 414,032,453,312<br>(366,425,646,578-434,785,000,876)       | 400,126,882,866<br>(347,599,298,870-416,504,117,954)       | 379,986,154,951<br>(325,695,069,399-393,989,991,956)       | 330,518,480,632<br>(297,278,233,022-366,940,523,961)       |
| Hungary        | Group I    | 23,685,421,257<br>(21,662,072,343-26,137,348,443)          | 18,812,166,965<br>(16,961,985,973-21,198,440,377)          | 15,577,173,889<br>(13,700,809,565-17,827,511,794)          | 13,000,106,967<br>(11,198,036,459-15,136,849,718)          | 11,450,874,697<br>(9,664,626,748-13,608,271,855)           | 10,504,278,346<br>(8,618,706,258-12,698,778,497)           |
| Hungary        | NCD        | 358,063,017,041<br>(330,641,871,026-388,070,423,705)       | 363,377,928,083<br>(336,497,703,017-394,551,484,803)       | 345,565,852,440<br>(317,415,331,264-376,771,025,355)       | 335,137,625,464<br>(306,162,613,117-367,373,913,144)       | 319,991,282,468<br>(290,664,181,329-352,124,259,732)       | 297,453,439,022<br>(267,865,873,525-320,388,853,301)       |
| Hungary        | Injuries   | 50,664,139,243<br>(47,528,786,428-53,964,438,396)          | 44,974,712,956<br>(42,015,239,838-48,194,001,461)          | 37,469,159,494<br>(34,921,236,036-40,286,687,041)          | 32,100,916,231<br>(29,870,310,939-34,559,841,908)          | 26,543,992,787<br>(24,656,880,811-28,782,084,693)          | 22,560,763,264<br>(20,550,158,521-24,907,137,718)          |
| Macedonia      | All causes | 58,597,714,591<br>(53,349,653,595-64,521,616,112)          | 56,673,920,110<br>(51,733,866,154-62,361,073,139)          | 56,792,491,913<br>(51,490,718,080-62,769,509,937)          | 57,457,049,964<br>(51,784,071,150-63,853,066,345)          | 56,790,107,124<br>(51,017,321,593-63,273,180,052)          | 56,350,443,032<br>(49,953,080,903-63,232,344,692)          |
| Macedonia      | Group I    | 10,912,584,219<br>(10,071,690,990-11,770,751,200)          | 7,311,818,043<br>(6,756,453,161-7,963,285,380)             | 4,527,113,044<br>(4,074,413,336-4,147,325,895)             | 3,648,428,538<br>(3,239,713,696-4,147,325,895)             | 2,909,582,088<br>(2,539,688,740-3,365,864,829)             | 2,795,266,782<br>(2,229,402,037-3,465,805,310)             |
| Macedonia      | NCD        | 42,511,030,699<br>(38,061,484,389-47,390,035,288)          | 44,655,751,410<br>(40,231,147,709-49,542,430,517)          | 47,890,720,693<br>(43,298,482,253-53,049,503,731)          | 50,146,410,184<br>(45,117,427,243-55,808,497,403)          | 50,525,847,305<br>(45,298,248,195-56,358,065,427)          | 50,071,442,911<br>(44,254,089,544-56,382,804,549)          |
| Macedonia      | Injuries   | 5,169,099,403<br>(4,698,501,734-5,725,074,422)             | 4,706,350,657<br>(4,268,186,799-5,225,333,977)             | 4,374,658,175<br>(3,998,700,057-4,811,391,210)             | 3,662,211,241<br>(3,325,950,436-4,057,967,681)             | 3,354,677,731<br>(3,034,290,845-3,730,491,641)             | 3,483,733,339<br>(3,120,572,636-3,871,616,493)             |
| Montenegro     | All causes | 16,395,650,646<br>(14,692,076,689-18,345,461,972)          | 18,111,834,850<br>(16,350,307,641-20,078,264,217)          | 19,037,070,626<br>(17,314,941,172-21,023,599,074)          | 18,079,846,446<br>(16,296,853,206-20,063,022,672)          | 17,103,486,744<br>(15,294,247,763-19,191,905,990)          | 17,258,282,143<br>(15,306,686,564-19,455,437,509)          |
| Montenegro     | Group I    | 1,955,520,447<br>(1,552,265,170-2,445,773,264)             | 1,654,797,050<br>(1,458,282,836-1,896,548,592)             | 1,767,079,607<br>(1,571,812,538-1,975,270,902)             | 1,143,690,775<br>(993,336,917-1,333,548,761)               | 900,984,740<br>(763,007,110-1,078,114,184)                 | 777,129,373<br>(631,726,346-956,813,203)                   |
| Montenegro     | NCD        | 12,506,053,70<br>(11,152,932,191-14,039,375,282)           | 14,384,756,822<br>(12,880,969,658-15,975,697,041)          | 15,344,377,587<br>(13,901,226,477-17,023,231,567)          | 15,256,279,985<br>(13,712,218,237-16,967,252,281)          | 14,659,049,661<br>(13,074,491,407-16,451,130,888)          | 15,060,286,047<br>(13,321,341,648-16,991,614,163)          |
| Montenegro     | Injuries   | 1,934,076,630<br>(1,747,418,366-2,150,923,129)             | 2,072,280,976<br>(1,915,911,325-2,266,567,828)             | 1,925,613,060<br>(1,778,161,768-2,104,714,426)             | 1,679,875,685<br>(1,540,205,235-1,844,601,126)             | 1,543,452,343<br>(1,404,744,900-1,695,961,214)             | 1,420,866,723<br>(1,266,481,923-1,589,606,703)             |
| Poland         | All causes | 1,288,706,572,129<br>(1,182,728,185,246-1,409,798,029,978) | 1,254,875,419,839<br>(1,145,857,594,936-1,376,803,785,000) | 1,184,809,529,486<br>(1,074,833,998,064-1,310,000,131,557) | 1,164,410,940,591<br>(1,052,650,374,824-1,293,570,802,968) | 1,151,131,822,669<br>(1,036,717,596,982-1,281,872,482,710) | 1,136,008,115,564<br>(1,016,116,222,833-1,272,561,702,479) |
| Poland         | Group I    | 104,416,683,823<br>(96,254,799,786-114,873,004,759)        | 81,652,344,595<br>(74,296,194,812-91,049,790,803)          | 58,478,846,311<br>(52,123,937,178-66,424,283,105)          | 53,311,373,996<br>(47,602,931,325-61,006,087,957)          | 51,300,838,171<br>(45,447,217,607-58,868,745,277)          | 45,685,120,006<br>(39,832,225,771-53,031,181,253)          |
| Poland         | NCD        | 1,032,914,711,414<br>(943,864,835,834-1,135,273,808,363)   | 1,027,522,514,384<br>(934,040,202,353-1,132,237,299,322)   | 991,944,314,655<br>(896,402,536,084-1,099,642,677,391)     | 985,096,239,053<br>(885,867,333,895-1,099,071,179,211)     | 984,718,774,804<br>(881,550,542,388-1,100,661,043,201)     | 984,689,983,018<br>(877,800,736,544-1,108,343,346,686)     |
| Poland         | Injuries   | 151,375,176,892<br>(141,226,787,761-162,370,050,472)       | 145,700,560,860<br>(136,156,560,556-156,460,925,862)       | 134,467,368,610<br>(125,512,020,297-144,724,054,870)       | 126,003,327,542<br>(117,596,552,978-135,426,541,020)       | 115,112,209,694<br>(107,514,614,316-123,962,472,717)       | 105,633,012,540<br>(97,675,698,479-115,361,948,966)        |
| Romania        | All causes | 883,197,811,801<br>(780,448,304,415-928,588,167,204)       | 883,197,811,801<br>(815,624,737,597-959,106,920,573)       | 812,802,728,714<br>(746,138,242,728-888,072,437,419)       | 770,121,956,076<br>(705,349,006,033-843,666,541,758)       | 725,449,605,033<br>(661,627,894,713-796,194,536,572)       | 674,979,185,606<br>(611,822,104,687-740,004,468,462)       |
| Romania        | Group I    | 117,641,923,034<br>(104,839,019,349-126,455,993,583)       | 90,789,142,984<br>(83,595,484,968-98,568,824,983)          | 79,772,162,867<br>(72,882,040,883-86,796,897,875)          | 62,773,620,006<br>(57,337,128,558-69,077,214,932)          | 46,238,321,877<br>(41,546,705,191-52,158,365,295)          | 37,069,694,028<br>(32,260,275,945-43,003,350,278)          |
| Romania        | NCD        | 631,635,850,597<br>(575,957,423,465-692,036,423,047)       | 695,116,442,474<br>(638,669,228,032-757,090,933,200)       | 654,856,838,337<br>(599,144,514,555-716,482,007,217)       | 639,594,849,584<br>(584,020,696,225-702,173,780,146)       | 619,525,608,230<br>(564,655,548,677-680,225,627,498)       | 587,332,235,855<br>(531,531,840,160-649,794,877,186)       |
| Romania        | Injuries   | 98,842,554,592<br>(91,520,520,006-106,989,850,229)         | 97,202,236,342<br>(90,665,780,210-105,093,828,801)         | 78,173,727,510<br>(72,240,522,509-84,978,027,603)          | 67,753,486,487<br>(62,589,426,735-73,689,457,813)          | 59,885,674,896<br>(55,105,003,185-65,079,329,604)          | 50,577,255,723<br>(46,167,775,485-56,321,367,670)          |
| Serbia         | All causes | 295,466,898,059<br>(267,718,834,975-326,389,729,746)       | 326,861,351,996<br>(300,631,825,366-357,614,625,710)       | 334,684,743,432<br>(306,222,831,354-364,621,421,096)       | 318,155,077,296<br>(290,977,321,874-349,451,545,873)       | 300,144,464,225<br>(271,989,304,403-331,947,501,744)       | 281,901,265,998<br>(253,809,659,449-313,654,028,375)       |
| Serbia         | Group I    | 31,064,162,641<br>(28,316,422,309-33,812,917,517)          | 25,482,518,337<br>(23,079,778,284-28,380,933,721)          | 18,196,316,008<br>(16,130,889,858-20,616,632,637)          | 14,314,305,492<br>(12,511,767,741-16,492,656,787)          | 12,540,460,843<br>(10,931,564,256-14,537,645,839)          | 11,382,696,055<br>(9,848,567,315-13,345,569,657)           |
| Serbia         | NCD        | 233,550,321,712<br>(210,149,103,400-258,874,922,390)       | 271,907,714,751<br>(246,910,556,447-298,249,671,187)       | 286,551,479,633<br>(261,779,741,912-313,876,544,799)       | 280,345,339,829<br>(255,116,918,669-307,776,905,734)       | 267,095,190,984<br>(241,592,562,412-295,394,779,186)       | 250,635,413,023<br>(224,968,059,447-278,380,722,482)       |
| Serbia         | Injuries   | 30,852,413,706<br>(27,816,222,384-33,747,007,557)          | 29,588,118,908<br>(27,212,360,667-32,030,886,586)          | 29,936,947,791<br>(27,079,375,001-32,964,449,542)          | 23,495,432,028<br>(21,704,870,904-25,478,336,905)          | 20,508,82,397<br>(18,913,668,592-22,524,609,489)           | 19,883,156,920<br>(18,247,569,055-21,942,767,812)          |
| Slovakia       | All causes | 174,375,755,399<br>(159,818,473,066-190,823,358,668)       | 165,622,395,896<br>(150,186,667,075-182,803,242,712)       | 165,371,448,067<br>(150,139,628,945-182,650,907,861)       | 164,011,554,708<br>(148,144,783,467-181,936,518,048)       | 160,016,158,401<br>(143,848,857,023-178,521,029,560)       | 153,489,496,367<br>(136,412,556,172-171,513,643,710)       |
| Slovakia       | Group I    | 15,003,102,215<br>(13,395,220,072-16,800,098,459)          | 12,355,917,402<br>(10,903,348,901-13,962,570,529)          | 10,119,322,885<br>(8,911,755,941-11,574,129,121)           | 9,374,387,866<br>(8,193,238,412-10,837,356,553)            | 8,679,044,249<br>(7,579,450,721-10,102,493,083)            | 7,925,552,387<br>(6,775,729,460-9,367,770,910)             |
| Slovakia       | NCD        | 138,569,939,086<br>(126,412,646,348-151,785,991,967)       | 134,896,717,237<br>(121,793,554,899-149,083,766,928)       | 138,251,433,665<br>(125,095,233,153-152,992,462,625)       | 139,308,927,071<br>(125,585,439,455-154,807,684,563)       | 137,344,445,691<br>(123,124,848,190-153,272,890,073)       | 132,891,270,576<br>(117,763,362,812-149,190,814,102)       |
| Slovakia       | Injuries   | 20,802,714,097<br>(19,126,985,093-22,663,893,412)          | 18,369,707,257<br>(16,926,747,818-19,966,371,275)          | 17,000,691,537<br>(15,707,339,747-18,439,193,863)          | 15,328,239,771<br>(14,144,537,643-16,742,728,413)          | 13,995,668,460<br>(12,836,044,649-15,398,841,699)          | 12,672,213,404<br>(11,440,994,908-14,189,490,933)          |
| Slovenia       | All causes | 60,839,867,002<br>(54,997,103,953-67,407,959,046)          | 60,134,326,416<br>(54,107,969,071-66,929,878,077)          | 58,963,463,700<br>(52,870,632,576-65,829,344,305)          | 57,167,450,473<br>(50,916,283,865-64,209,199,745)          | 54,499,255,114<br>(48,324,868,388-62,125,340,822)          | 53,449,255,114<br>(46,738,689,172-61,042,579,328)          |
| Slovenia       | Group I    | 3,531,574,627<br>(3,062,284,835-4,116,308,780)             | 2,855,471,109<br>(2,635,175,095-3,647,057,738)             | 2,855,471,109<br>(2,455,465,327-3,351,584,182)             | 2,671,588,042<br>(2,276,768,770-3,175,339,846)             | 2,516,970,997<br>(2,124,950,517-3,043,974,636)             | 2,433,742,637<br>(2,041,105,401-2,944,044,223)             |
| Slovenia       | NCD        | 48,293,130,732<br>(43,395,525,568-53,628,516,451)          | 48,785,525,398<br>(43,664,279,692-54,377,599,937)          | 48,855,525,121<br>(43,538,417,209-54,690,433,058)          | 48,181,319,325<br>(42,782,703,413-54,268,957,152)          | 47,132,486,813<br>(41,397,004,715-53,331,571,139)          | 46,596,242,178<br>(40,600,847,512-53,298,446,089)          |
| Slovenia       | Injuries   | 9,015,161,644<br>(8,377,544,509-9,701,561,739)             | 8,275,447,014<br>(7,714,454,475-8,898,725,752)             | 9,907,968,579<br>(6,740,985,359-7,822,929,414)             | 6,314,543,106<br>(5,870,894,657-6,821,772,090)             | 5,153,116,240<br>(4,734,054,959-5,651,568,217)             | 4,919,270,299<br>(4,004,809,476-4,957,533,174)             |
| Central Asia   | All causes | 2,766,779,256,884<br>(2,591,292,243,606-2,967,709,928,568) | 2,953,387,085,688<br>(2,765,847,564,176-3,158,006,023,020) | 2,708,426,775,463<br>(2,516,711,656,919-2,909,005,328,748) | 2,695,481,838,930<br>(2,499,503,288,671-2,913,700,991,687) | 2,632,899,969,176<br>(2,427,443,664,922-2,865,106,294,649) | 2,617,199,654,215<br>(2,389,811,089,672-2,864,840,299,047) |
| Central Asia   | Group I    | 1,065,136,712,248<br>(1,015,751,547,844-1,123,611,120,778) | 1,008,859,717,583<br>(960,191,751,843-1,067,543,699,099)   | 980,356,648,030<br>(735,722,571,572-829,410,774,889)       | 970,819,449,684<br>(621,083,339,608-724,327,456,625)       | 906,516,040,449<br>(559,136,190,375-657,661,346            |                                                            |



**Appendix Table 3. DALYs for all causes and level 1 cause groups by location for 1990 - 2015, both sexes combined.**

|                             | Cause      | 1990                                                          | 1995                                                          | 2000                                                          | 2005                                                          | 2010                                                          | 2015                                                          |
|-----------------------------|------------|---------------------------------------------------------------|---------------------------------------------------------------|---------------------------------------------------------------|---------------------------------------------------------------|---------------------------------------------------------------|---------------------------------------------------------------|
| Azerbaijan                  | Group I    | 136 696 023 426<br>(124,211,344,670-150,419,613,201)          | 130 626 568 905<br>(118,657,526,466-143,976,378,285)          | 94 404 456 238<br>(86,159,639,959-103,540,368,299)            | 82 267 243 152<br>(74,050,145,363-91,089,827,497)             | 71 917 189 130<br>(60,075,759,951-85,188,944,201)             | 56 635 522 875<br>(46,892,809,629-67,260,361,647)             |
| Azerbaijan                  | NCD        | 143 749 839 023<br>(129,302,663,050-159,479,100,722)          | 162 500 489 655<br>(147,477,515,234-179,377,915,437)          | 170 213 031 410<br>(153,317,700,590-188,872,617,359)          | 184 229 884 548<br>(165,318,677,904-205,368,449,421)          | 195 792 347 208<br>(175,519,089,475-219,074,621,504)          | 204 546 712 435<br>(181,707,348,960-229,961,193,908)          |
| Azerbaijan                  | Injuries   | 33 035 366 402<br>(30,307,720,296-35,790,838,474)             | 38 260 453 089<br>(35,080,597,212-41,399,363,170)             | 27 110 386 266<br>(24,701,499,070-29,803,972,154)             | 24 905 860 855<br>(22,617,321,854-27,358,237,938)             | 23 123 224 724<br>(20,629,039,190-25,765,680,885)             | 23 826 612 051<br>(21,063,589,163-27,030,456,968)             |
| Georgia                     | All causes | 196 689 040 221<br>(180,309,966,574-214,240,853,036)          | 174 697 718 253<br>(159,689,838,866-191,614,794,935)          | 161 621 616 148<br>(147,237,027,230-177,324,345,392)          | 158 287 967 900<br>(144,171,373,812-173,880,779,636)          | 153 082 253 231<br>(139,512,805,952-168,096,806,420)          | 142 969 941 944<br>(129,652,484,682-157,202,689,586)          |
| Georgia                     | Group I    | 38 857 286 673<br>(35,570,800,964-42,277,850,210)             | 31 817 886 458<br>(29,166,764,669-34,639,803,242)             | 24 031 049 108<br>(21,603,093,158-26,749,855,966)             | 18 633 144 302<br>(16,412,473,902-21,058,087,977)             | 15 513 544 587<br>(13,473,697,806-17,840,805,014)             | 12 355 486 357<br>(10,593,231,221-14,397,656,144)             |
| Georgia                     | NCD        | 136 106 280 312<br>(122,839,917,279-150,197,616,292)          | 125 722 142 329<br>(113,150,697,891-139,932,019,909)          | 124 529 459 788<br>(112,915,909,015-137,585,513,651)          | 127 118 753 708<br>(115,516,945,648-140,149,317,504)          | 124 241 509 003<br>(112,952,658,320-137,246,848,043)          | 117 515 519 190<br>(106,387,888,027-129,755,397,840)          |
| Georgia                     | Injuries   | 21 725 473 236<br>(19,882,938,804-23,725,643,298)             | 27 117 689 466<br>(25,200,835,772-28,794,667,912)             | 37 157 689 466<br>(34,200,835,772-40,168,189,481)             | 41 671 289 642<br>(38,030,331,415-45,307,614,078)             | 53 147 289 642<br>(47,074,938,543-61,392,919,277)             | 65 131 896 397<br>(57,299,341,613-72,974,112,803)             |
| Kazakhstan                  | All causes | 609 614 419 332<br>(564,143,595,118-663,431,596,320)          | 720 605 339 713<br>(670,564,583,397-775,246,610,862)          | 628 551 550 520<br>(585,856,544,806-677,781,603,859)          | 657 214 189 012<br>(611,164,169,989-707,079,876,003)          | 593 183 801 241<br>(545,482,194,569-645,846,021,863)          | 592 239 263 534<br>(533,007,493,453-652,313,105,608)          |
| Kazakhstan                  | Group I    | 149 401 165 485<br>(136,218,548,237-164,513,056,454)          | 141 435 894 900<br>(128,312,257,890-154,952,939,471)          | 108 419 822 405<br>(98,471,448,725-120,487,597,915)           | 103 145 696 975<br>(92,127,610,716-116,101,638,659)           | 92 336 017 851<br>(80,796,252,829-105,184,757,046)            | 81 430 939 397<br>(68,861,647,479-95,067,147,109)             |
| Kazakhstan                  | NCD        | 363 275 249 134<br>(330,788,281,182-400,452,985,955)          | 436 400 222 176<br>(402,779,980,844-473,467,124,395)          | 410 998 616 406<br>(379,604,958,774-447,102,754,433)          | 441 515 844 399<br>(408,304,546,370-478,068,169,776)          | 409,444,667,163<br>(374,775,684,037-448,545,440,192)          | 422,165,597,253<br>(377,209,544,455-469,892,861,897)          |
| Kazakhstan                  | Injuries   | 96 938 004 713<br>(92,298,450,459-101,811,382,055)            | 147,769,222,637<br>(123,661,234,045-161,897,129,523)          | 197,562,734,114<br>(184,306,660,347-213,852,545,224)          | 195,672,638,611<br>(180,144,147,859-217,327,349,534)          | 91,403,116,226<br>(87,304,687,446-96,294,381,354)             | 88,732,726,885<br>(81,825,673,707-96,234,346,555)             |
| Kyrgyzstan                  | All causes | 191 691 210 401<br>(180 070 399 875-204 965 309 341)          | 187 982 059 337<br>(175 717 387 180-200 734 636 860)          | 183 462 186 830<br>(170 386 719 953-197 269 835 484)          | 180 498 146 867<br>(166 501 243 441-195 017 311 415)          | 184 306 466 046<br>(170 376 070 544-200 459 230 064)          | 181 996 891 956<br>(166 563 140 255-199 948 238 690)          |
| Kyrgyzstan                  | Group I    | 77 795 247 322<br>(73 968 753 981-82 325 886 285)             | 65 437 917 388<br>(61 987 946 356-69 167 959 519)             | 54 658 950 557<br>(51 220 630 421-58 121 601 984)             | 47 585 371 704<br>(44 269 265 445-50 982 022 206)             | 48 427 182 973<br>(44 733 210 538-52 384 458 539)             | 44 457 292 925<br>(40 040 116 522-49 610 150 843)             |
| Kyrgyzstan                  | NCD        | 88 604 376 801<br>(80 255 373 837-97 170 020 786)             | 97 949 847 224<br>(88 598 082 663-107 065 267 539)            | 106 045 271 484<br>(96 267 322 022-116 876 419 099)           | 112 227 521 690<br>(101 832 087 091-122 577 892 815)          | 112 882 736 463<br>(101 967 538 244-124 872 727 148)          | 117 701 078 317<br>(105 547 405 465-131 212 056 126)          |
| Kyrgyzstan                  | Injuries   | 25 201 586 278<br>(23 287 323 066-27 042 083 694)             | 24 594 294 725<br>(22 686 803 962-26 188 191 003)             | 22 757 964 789<br>(21 253 343 285-24 228 893 506)             | 20 685 253 473<br>(19 364 214 283-22 186 900 630)             | 22 996 546 609<br>(21 750 902 427-24 500 964 707)             | 19 838 520 714<br>(18 338 308 905-21 631 287 905)             |
| Mongolia                    | All causes | 111 337 553 428<br>(104 970 357 329-118 043 958 870)          | 100 811 524 745<br>(94 639 609 147-107 338 542 101)           | 93 282 352 783<br>(86 928 803 643-100 187 833 368)            | 95 197 729 824<br>(88 019 507 116-102 722 184 426)            | 100 873 338 339<br>(93 105 749 458-109 138 063 656)           | 102 783 784 623<br>(94 197 454 175-112 415 201 001)           |
| Mongolia                    | Group I    | 51 765 685 198<br>(47 574 324 126-56 011 080 954)             | 37 574 149 037<br>(34 482 297 724-40 654 229 239)             | 26 682 067 132<br>(24 502 894 163-28 964 793 663)             | 21 864 467 011<br>(19 803 202 455-24 264 906 715)             | 20 803 238 946<br>(18 058 994 578-23 765 992 861)             | 17 456 168 255<br>(14 782 441 098-20 854 790 675)             |
| Mongolia                    | NCD        | 47 084 859 289<br>(42 260 995 535-51 927 175 815)             | 50 625 043 501<br>(46 083 058 775-55 177 988 275)             | 53 243 330 871<br>(48 474 496 205-58 418 521 072)             | 57 644 880 654<br>(52 266 461 435-63 238 125 623)             | 62 879 861 910<br>(57 040 619 429-68 867 736 090)             | 68 057 506 683<br>(61 271 450 567-74 964 094 545)             |
| Mongolia                    | Injuries   | 12 487 008 941<br>(11 163 458 971-14 030 390 944)             | 12 612 332 207<br>(11 469 451 407-13 865 452 365)             | 13 568 954 780<br>(12 088 909 769-14 442 573 412)             | 15 688 382 159<br>(13 729 170 628-17 045 388 068)             | 17 900 237 844<br>(14 783 624 905-18 662 923 302)             | 17 270 109 684<br>(14 902 790 700-18 952 312 652)             |
| Tajikistan                  | All causes | 279 085 084 081<br>(260 434 873 574-299 255 059 991)          | 258 708 745 357<br>(274 923 941 642-318 729 244 281)          | 255 400 574 999<br>(236 267 279 984-273 894 422 738)          | 228 770 447 141<br>(211 496 261 852-248 684 475 696)          | 230 106 525 024<br>(208 485 286 717-250 262 626 832)          | 230 106 525 024<br>(203 677 683 002-257 217 077 567)          |
| Tajikistan                  | Group I    | 162 797 427 006<br>(149 489 680 955-177 076 585 430)          | 163 551 564 641<br>(149 920 085 798-178 158 797 554)          | 126 995 474 408<br>(116 954 408 475-137 847 701 494)          | 88 397 377 418<br>(88 045 510 615-106 190 485 974)            | 81 202 644 516<br>(79 301 255 416-98 087 694 824)             | 81 202 644 516<br>(68 563 593 851-95 530 603 164)             |
| Tajikistan                  | NCD        | 92 101 651 871<br>(82 151 809 163-103 751 311 068)            | 101 561 680 248<br>(91 142 712 959-112 870 053 211)           | 104 020 441 244<br>(93 547 626 209-115 796 302 865)           | 110 892 984 842<br>(98 831 125 505-124 960 689 039)           | 118 226 417 864<br>(105 095 602 680-133 767 323 587)          | 127 205 252 623<br>(111 444 640 169-144 513 754 476)          |
| Tajikistan                  | Injuries   | 24 186 005 204<br>(21 851 473 483-26 840 950 067)             | 30 595 500 644<br>(27 665 198 445-33 510 269 993)             | 24 384 659 545<br>(22 483 949 769-26 672 238 358)             | 21 223 933 861<br>(19 520 182 852-23 127 721 550)             | 21 605 633 043<br>(19 645 218 548-23 759 044 699)             | 21 698 627 884<br>(19 645 218 548-23 759 044 699)             |
| Turkmenistan                | All causes | 188 568 706 315<br>(172 069 914 703-206 332 359 242)          | 195 711 292 705<br>(178 243 585 553-215 047 861 383)          | 191 455 772 341<br>(172 068 677 710-199 816 812 372)          | 179 379 632 817<br>(161 068 677 710-199 816 812 372)          | 170 048 959 162<br>(152 241 122 490-189 575 785 671)          | 165 598 600 613<br>(148 490 912 328-183 992 855 230)          |
| Turkmenistan                | Group I    | 99 798 427 106<br>(87 654 448 291-112 559 118 463)            | 92 531 193 479<br>(80 297 303 398-105 911 005 003)            | 77 757 407 957<br>(64 922 501 171-93 096 015 456)             | 62 786 838 303<br>(50 327 243 419-76 503 695 105)             | 50 296 897 531<br>(40 235 470 129-61 985 904 202)             | 41 400 489 872<br>(33 354 399 474-51 410 249 579)             |
| Turkmenistan                | NCD        | 69 517 197 991<br>(63 107 863 034-76 399 278 444)             | 82 534 068 999<br>(75 109 954 978-90 271 651 817)             | 92 372 850 663<br>(84 205 060 617-101 066 320 745)            | 97 019 536 698<br>(88 086 790 816-107 441 940 552)            | 102 450 600 540<br>(92 312 157 134-114 194 782 252)           | 108 078 985 496<br>(96 470 152 157-120 906 103 480)           |
| Turkmenistan                | Injuries   | 19 253 036 618<br>(17 299 848 895-21 415 997 806)             | 20 646 030 227<br>(18 661 295 780-23 007 588 808)             | 21 325 514 320<br>(19 143 170 454-23 567 017 499)             | 19 573 257 815<br>(17 521 270 424-21 641 193 959)             | 17 301 461 090<br>(15 736 483 334-19 347 399 880)             | 16 119 125 245<br>(14 555 556 432-18 467 832 811)             |
| Uzbekistan                  | All causes | 757 746 365 324<br>(695 250 714 640-822 947 060 416)          | 833 278 588 495<br>(769 866 074 040-908 225 920 601)          | 804 774 283 396<br>(734 514 920 629-875 341 835 048)          | 807 368 613 420<br>(733 361 642 301-891 827 528 554)          | 820 860 251 845<br>(736 745 131 027-907 164 129 773)          | 825 577 280 268<br>(742 436 121 137-924 766 475 827)          |
| Uzbekistan                  | Group I    | 318 178 249 161<br>(287 433 871 542-351 322 219 867)          | 323 913 842 845<br>(296 514 325 168-357 368 068 888)          | 254 186 955 183<br>(228 953 682 914-283 851 957 351)          | 226 783 988 208<br>(196 929 692 802-264 513 600 776)          | 209 875 376 680<br>(178 285 827 913-247 712 862 249)          | 180 143 121 110<br>(150 795 481 591-214 387 335 934)          |
| Uzbekistan                  | NCD        | 352 118 953 862<br>(316 368 340 471-393 980 668 420)          | 415 261 111 275<br>(374 111 354 478-460 120 186 219)          | 455 711 198 354<br>(410 494 885 044-504 688 538 754)          | 492 776 631 108<br>(442 846 917 071-548 141 007 453)          | 520 496 506 138<br>(466 086 716 871-582 133 378 104)          | 554 503 686 520<br>(493 710 662 132-625 277 435 581)          |
| Uzbekistan                  | Injuries   | 87 448 987 301<br>(79 937 342 427-95 129 502 797)             | 94 103 634 375<br>(86 856 757 409-101 955 557 688)            | 94 876 129 859<br>(87 330 630 599-102 157 850 244)            | 87 807 994 104<br>(80 815 515 305-95 416 709 057)             | 91 110 481 637<br>(82 344 753 475-99 806 060 446)             | 91 110 481 637<br>(81 714 178 058-101 883 128 237)            |
| Latin America and Caribbean | All causes | 13 705 950 512 726<br>(12 818 035 623 300-14 885 523 261 662) | 13 665 968 913 044<br>(12 594 535 178 267-14 860 559 596 150) | 13 506 763 032 913<br>(12 315 330 617 665-14 829 723 374 097) | 13 583 212 392 528<br>(12 292 042 192 929-15 023 920 279 201) | 15 482 124 703 829<br>(13 715 316 566 281-17 407 247 887 688) | 14 652 968 447 997<br>(13 118 151 861 380-16 311 588 360 302) |
| Latin America and Caribbean | Group I    | 5 098 956 574 042<br>(4 902 501 630 754-5 336 487 426 443)    | 4 271 846 947 125<br>(4 098 376 698 539-4 490 266 820 969)    | 3 563 928 234 924<br>(3 379 630 956 905-3 788 046 279 484)    | 3 054 638 138 066<br>(2 865 309 471 284-3 289 192 827 352)    | 2 659 045 025 514<br>(2 458 701 054 003-2 903 959 902 594)    | 2 364 643 645 415<br>(2 157 896 473 573-2 622 210 492 649)    |
| Latin America and Caribbean | NCD        | 7 284 181 204 607<br>(5 829 534 344 216-7 460 872 148 307)    | 7 864 816 588 789<br>(6 409 558 461 458-8 222 955 194 420)    | 8 492 177 101 280<br>(6 891 165 705 173-8 938 406 021 576)    | 8 492 177 101 280<br>(7 416 667 786 654-9 657 840 311 133)    | 9 285 049 434 705<br>(8 088 522 182 271-10 575 867 436 378)   | 10 227 394 542 368<br>(8 929 554 527 910-11 646 891 266 070)  |
| Latin America and Caribbean | Injuries   | 2 046 021 248 268<br>(1 974 192 533 934-2 115 459 575 742)    | 2 009 940 761 312<br>(2 048 206 311 362-2 167 653 079 830)    | 2 066 307 153 182<br>(2 021 641 196 105-2 141 317 762 548)    | 2 066 307 153 182<br>(1 974 805 631 816-2 098 437 645 472)    | 2 009 940 761 312<br>(2 372 202 529 851-4 788 666 503 929)    | 2 009                                                         |

Appendix Table 3. DALYs for all causes and level 1 cause groups by location for 1990 - 2015, both sexes combined.

|                      | Cause      | 1990                                                     | 1995                                                     | 2000                                                     | 2005                                                     | 2010                                                     | 2015                                                                     |
|----------------------|------------|----------------------------------------------------------|----------------------------------------------------------|----------------------------------------------------------|----------------------------------------------------------|----------------------------------------------------------|--------------------------------------------------------------------------|
| Costa Rica           | All causes | 64,907,330.17<br>(57,729,487,828-73,166,889,460)         | 72,903,788,308<br>(65,055,302,836-82,312,117,339)        | 78,627,363,437<br>(69,206,801,475-89,658,245,456)        | 83,198,141,240<br>(72,718,242,582-93,193,375,690)        | 89,374,679,967<br>(77,577,651,937-102,467,022,303)       | 96,378,301,062<br>(83,492,613,041-111,085,247,545)                       |
| Costa Rica           | Group I    | 12,462,663.273-16,441,239.027<br>43,174,955.024          | 13,684,980.219<br>50,436,736.701                         | 11,957,057.351<br>56,958,597.476                         | 10,662,223.960<br>62,668,678.283                         | 9,835,220.599<br>69,110,022.097                          | 9,199,666.925<br>76,950,071.179                                          |
| Costa Rica           | NCD        | 37,368,728.656-49,976,863.007<br>7,497,366.903           | 43,925,449.798-58,312,646.234<br>8,782,071.388           | (49,167,298,495-66,036,325,900)<br>9,711,708.610         | (53,873,022,965-72,923,044,288)<br>9,867,239.007         | (59,186,843,721-80,191,642,131)<br>10,429,437.272        | (65,555,054,272-89,923,643,182)<br>10,228,562.958                        |
| Costa Rica           | Injuries   | (7,173,688,607-7,860,854,609)<br>213,036,171.173         | (8,446,912,592-9,177,734,352)<br>191,969,046.752         | (9,321,296,272-10,112,879,282)<br>176,629,388.317        | (9,470,274,058-10,269,449,490)<br>168,912,854.251        | (10,015,303,303-10,847,502,610)<br>165,942,352.117       | (9,576,971,437-10,880,942,540)<br>166,518,148.601                        |
| El Salvador          | All causes | (197,097,081,462-230,397,239,324)<br>71,118,143,820      | (176,154,059,515-208,774,877,238)<br>56,332,593.562      | (161,018,816,625-192,804,541,677)<br>43,248,198,774      | (153,390,103,555-187,533,411,516)<br>30,786,653.240      | (149,170,275,800-185,418,458,452)<br>24,648,151.343      | (147,788,046,271-186,638,260,003)<br>22,252,292.337                      |
| El Salvador          | Group I    | (64,799,103,853-77,979,804,178)<br>96,440,951,930        | (50,508,083,960-62,337,079,795)<br>95,639,428,597        | (38,560,046,744-48,124,443,444)<br>95,144,660.514        | (27,038,357,472-35,538,607,772)<br>99,027,774.726        | (20,837,087,615-29,492,651,365)<br>103,648,412.414       | (18,724,594,826-26,660,864,658)<br>108,210,930,975                       |
| El Salvador          | NCD        | (85,488,348,137-108,340,764,779)<br>45,477,075.422       | (84,360,339,628-107,718,919,106)<br>39,997,024.593       | (83,473,387,439-108,101,750,921)<br>38,236,529,029       | (86,958,538,884-112,973,807,059)<br>39,098,426,281       | (90,586,724,064-118,601,790,738)<br>37,645,788,459       | (93,809,475,499-124,546,786,130)<br>36,054,925,268                       |
| El Salvador          | Injuries   | (41,337,793,825-49,414,996,119)<br>471,121,534,265       | (36,934,228,072-42,128,703,168)<br>450,211,406,809       | (36,137,581,736-40,383,061,154)<br>444,468,928,445       | (36,635,629,868-41,067,128,207)<br>453,418,226,329       | (34,811,934,217-39,942,923,679)<br>450,332,588,538       | (32,476,206,066-39,652,772,713)<br>456,680,527,364                       |
| Guatemala            | All causes | (446,485,859,621-514,394,307)<br>271,888,439,962         | (423,183,756,206-481,522,888,000)<br>230,517,735,816     | (413,357,309,878-479,356,289,517)<br>213,995,489,871     | (416,506,253,532-494,275,408,663)<br>187,171,130,124     | (407,612,670,369-497,030,901,751)<br>155,221,598,691     | (403,602,167,127-513,443,543,736)<br>132,153,599,552                     |
| Guatemala            | Group I    | (258,302,047,686-286,330,965,258)<br>151,736,591,781     | (219,305,511,918-243,427,500,193)<br>168,560,823,776     | (201,038,783,424-227,908,121,310)<br>174,917,729,578     | (171,647,330,580-202,622,844,547)<br>195,789,601,923     | (138,603,290,788-173,654,127,017)<br>221,989,185,234     | (114,444,854,580-151,505,440,788)<br>248,522,852,350                     |
| Guatemala            | NCD        | (134,729,321,464-169,510,766,225)<br>47,496,502,523      | (149,007,946,640-188,524,569,439)<br>51,132,847,216      | (153,527,503,862-198,607,960,918)<br>55,555,708,816      | (170,996,408,449-223,034,615,322)<br>70,457,494,282      | (193,916,909,659-253,446,619,877)<br>73,122,804,613      | (213,103,932,960-286,737,752,916)<br>76,003,875,462                      |
| Guatemala            | Injuries   | (44,697,816,362-50,370,629,349)<br>191,822,611,788       | (49,173,005,890-53,011,861,573)<br>187,585,833,407       | (53,790,062,353-57,541,501,986)<br>188,739,271,172       | (68,186,495,144-73,029,629,194)<br>189,661,553,332       | (70,915,803,708-75,502,264,192)<br>194,872,388,340       | (67,183,612,334-85,242,327,893)<br>201,293,991,535                       |
| Honduras             | All causes | (179,213,017,592-205,631,859,487)<br>77,292,571,172      | (172,154,319,612-204,992,323,325)<br>66,268,052,867      | (170,197,248,636-210,156,603,785)<br>58,250,228,701      | (168,143,541,238-214,263,245,496)<br>50,223,800,020      | (171,472,290,278-222,454,594,206)<br>15,691,495,418      | (174,955,957,190-231,076,257,007)<br>38,230,943,263                      |
| Honduras             | Group I    | (71,392,485,959-83,232,800,077)<br>95,680,215,159        | (61,036,710,591-72,907,002,141)<br>101,249,604,686       | (53,142,094,089-63,947,133,378)<br>106,212,592,682       | (45,556,608,358-55,553,572,830)<br>112,327,707,819       | (38,977,556,110-48,640,906,151)<br>120,218,789,355       | (33,488,638,064-43,788,540,152)<br>132,741,560,494                       |
| Honduras             | NCD        | (85,622,284,388-106,346,631,095)<br>18,849,825,457       | (89,869,985,017-113,496,716,556)<br>20,068,175,919       | (92,928,155,480-120,855,933,698)<br>24,276,449,789       | (96,568,416,559-129,504,210,360)<br>27,110,045,483       | (102,820,815,666-138,716,473,017)<br>30,962,103,587      | (113,284,608,773-153,042,079,596)<br>30,321,487,778                      |
| Honduras             | Injuries   | (16,862,208,152-20,637,393,250)<br>2,582,217,714,156     | (17,107,121,986-22,972,727,657)<br>2,512,963,868,613     | (19,003,772,909-29,216,144,677)<br>2,455,206,755,892     | (20,015,712,368-33,260,271,052)<br>2,509,007,680,702     | (22,396,684,534-39,077,021,534)<br>2,733,572,279,425     | (22,143,067,725-39,785,594,064)<br>2,908,724,900,037                     |
| Mexico               | All causes | (2,406,697,171,553-2,788,257,871,227)<br>920,717,947,288 | (2,313,322,435,533-2,740,460,719,813)<br>718,168,210,325 | (2,231,033,018,698-2,700,597,712,846)<br>568,664,777,147 | (2,263,862,330,161-2,733,547,023,188)<br>475,644,876,199 | (2,456,009,201,945-3,039,140,504,304)<br>375,190,013,588 | (2,603,337,218,500-3,244,865,873,074)<br>415,257,766,971                 |
| Mexico               | Group I    | (886,958,395,750-957,660,898,239)<br>1,286,398,406,190   | (687,442,624,495-753,076,016,466)<br>1,444,024,003,767   | (540,137,634,320-603,076,656,933)<br>1,725,934,151,060   | (447,610,722,887-509,356,461,875)<br>1,569,746,748,265   | (386,775,020,534-449,537,522,275)<br>415,257,766,971     | (337,982,239,115-403,454,364,804)<br>2,192,787,231,958                   |
| Mexico               | NCD        | (1,135,396,048,229-1,456,986,214,422)<br>375,101,360.679 | (1,271,269,106,254-1,638,259,712,415)<br>316,615,230.479 | (1,376,623,557,840-1,784,764,084,211)<br>307,428,653,444 | (1,514,277,487,058-1,960,982,666,506)<br>368,634,541.844 | (1,708,044,993,543-2,216,348,541,642)<br>348,747,654.492 | (1,923,111,388,916-2,490,190,156,278)<br>340,835,636,090-358,066,063,774 |
| Mexico               | Injuries   | (365,943,839,310-386,664,633,474)<br>150,628,546.694     | (344,082,109,330-359,996,036,933)<br>136,856,907,449     | (309,200,897,655-325,505,727,669)<br>123,965,264,672     | (300,267,784,017-315,640,141,098)<br>119,665,271,239     | (301,014,325,889-377,681,497,285)<br>119,558,107,646     | (340,835,636,090-358,066,063,774)<br>124,008,738,795                     |
| Nicaragua            | All causes | (140,198,520,501-161,913,466,985)<br>78,903,580,385      | (125,478,599,614-149,964,164,626)<br>61,136,980,092      | (112,277,215,488-137,190,405,143)<br>41,240,967,489      | (107,030,884,420-133,925,493,374)<br>33,445,201,536      | (106,436,068,254-134,694,807,136)<br>26,368,083,842      | (108,241,552,450-141,361,113,584)<br>21,648,722,776                      |
| Nicaragua            | Group I    | (73,933,578,427-83,960,510,408)<br>54,870,295,179        | (57,419,154,368-65,259,479,652)<br>59,550,562,480        | (40,930,394,604-47,972,385,402)<br>64,287,978,943        | (30,305,728,306-36,833,967,743)<br>71,244,238,954        | (23,193,445,292-29,839,763,743)<br>78,908,710,141        | (18,486,314,731-25,159,212,951)<br>88,026,035,967                        |
| Nicaragua            | NCD        | (46,899,344,215-62,980,747,341)<br>16,854,671,130        | (50,836,170,431-68,975,922,555)<br>16,169,364,877        | (54,838,734,313-74,488,420,319)<br>15,436,318,240        | (60,612,437,311-83,006,432,866)<br>14,975,830,749        | (67,682,103,637-91,838,550,945)<br>14,281,313,663        | (74,436,487,559-107,377,699,507)<br>14,333,980,052                       |
| Nicaragua            | Injuries   | (15,708,964,591-18,149,718,286)<br>60,064,883,715        | (15,021,757,958-17,314,478,381)<br>65,986,305,210        | (14,482,106,497-16,421,351,658)<br>70,035,525,331        | (14,005,875,497-15,883,509,044)<br>75,716,522,479        | (13,409,771,968-15,248,307,295)<br>84,626,864,175        | (12,874,475,911-15,943,656,810)<br>90,024,907,098                        |
| Panama               | All causes | (53,761,140,737-66,915,511,993)<br>15,832,492,379        | (58,964,382,708-74,168,609,919)<br>16,013,599,876        | (62,029,944,147-79,106,972,443)<br>16,295,352,136        | (67,055,016,573-85,259,510,786)<br>17,162,923,987        | (75,002,834,090-95,492,926,040)<br>17,220,607,783        | (78,198,908,697-103,048,971,433)<br>16,266,460,075                       |
| Panama               | Group I    | (13,873,323,809-18,327,656,014)<br>35,882,796,554        | (13,979,274,143-18,654,737,110)<br>40,397,804,103        | (14,164,792,795-18,872,470,330)<br>44,087,440,979        | (14,969,680,643-19,729,718,357)<br>49,000,576,491        | (14,956,154,220-19,852,372,118)<br>55,617,575,110        | (13,707,891,111-19,341,563,809)<br>62,267,997,647                        |
| Panama               | NCD        | (30,757,989,165-41,454,020,130)<br>9,349,594,782         | (34,644,484,586-46,827,172,311)<br>9,574,901,231         | (37,709,901,246-51,261,241,285)<br>9,652,732,215         | (41,781,642,607-57,093,828,366)<br>9,533,022,004         | (47,539,440,390-64,781,093,739)<br>11,788,681,282        | (52,566,463,513-72,965,402,071)<br>11,490,449,376                        |
| Panama               | Injuries   | (7,747,867,085-8,944,257,265)<br>517,918,523,565         | (8,891,269,137-10,235,318,358)<br>586,807,861,991        | (8,933,975,331-10,385,140,265)<br>632,422,581,675        | (8,726,858,831-10,353,709,822)<br>687,033,980,675        | (10,790,993,351-12,745,384,769)<br>759,998,094,585       | (9,946,752,828-13,126,134,717)<br>837,833,156,146                        |
| Venezuela            | All causes | (472,293,662,613-569,993,335,311)<br>157,055,066,156     | (529,000,102,951-649,522,507,112)<br>168,896,726,802     | (568,391,352,376-705,278,373,933)<br>159,091,280,284     | (614,967,845,015-770,101,337,602)<br>153,003,588,997     | (679,820,888,459-852,176,612,283)<br>151,240,977,267     | (729,572,287,588-951,876,578,483)<br>153,588,322,127                     |
| Venezuela            | Group I    | (146,378,831,955-170,734,128,821)<br>282,592,628,842     | (154,161,762,461-186,414,438,446)<br>323,515,602,987     | (140,952,691,329-182,625,234,511)<br>357,323,098,456     | (133,901,437,111-179,584,838,399)<br>396,364,424,578     | (131,390,322,697-179,523,060,361)<br>448,822,125,707     | (130,492,462,423-182,494,229,003)<br>516,929,357,897                     |
| Venezuela            | NCD        | (246,078,568,110-321,320,346,896)<br>78,270,828,568      | (281,658,488,161-368,518,020,786)<br>94,395,532,202      | (310,769,411,488-409,023,641,648)<br>116,008,202,935     | (342,915,782,628-454,345,263,534)<br>137,665,967,101     | (389,000,411,465-513,251,815,402)<br>160,274,991,610     | (441,975,498,910-594,495,806,823)<br>167,315,476,121                     |
| Venezuela            | Injuries   | (75,513,390,308-80,897,183,395)<br>1,658,455,386,800     | (91,209,802,609-97,608,371,764)<br>1,527,796,423,001     | (112,946,437,186-118,982,827,117)<br>1,372,011,064,454   | (134,355,962,316-140,947,897,409)<br>1,299,946,056,755   | (156,440,605,904-164,010,821,311)<br>1,296,537,492,822   | (147,435,856,994-188,416,938,184)<br>1,317,495,900,287                   |
| Andean Latin America | All causes | (1,556,827,207,879-1,773,626,516,033)<br>775,699,339,972 | (1,419,001,791,831-1,647,923,596,746)<br>633,704,995,640 | (1,255,340,173,893-1,498,731,170,194)<br>482,992,268,393 | (1,174,777,182,446-1,441,976,549,748)<br>390,694,675,933 | (1,159,603,884,502-1,449,249,672,373)<br>327,926,262,010 | (1,158,724,196,718-1,492,373,315,990)<br>285,341,018,616                 |
| Andean Latin America | Group I    | (739,890,351,394-816,232,586,313)<br>656,575,744,397     | (605,147,611,413-665,403,558,519)<br>684,367,542,714     | (456,922,337,346-513,182,070,305)<br>703,171,724,699     | (364,755,669,650-421,843,562,313)<br>740,932,542,801     | (300,890,152,065-359,934,371,373)<br>800,131,951,293     | (255,825,703,073-319,053,909,850)<br>871,429,894,012                     |
| Andean Latin America | NCD        | (578,808,386,618-738,964,250,411)<br>236,180,102,432     | (599,763,046,517-776,535,968,280)<br>209,724,184,647     | (611,709,961,372-800,920,718,855)<br>185,887,071,362     | (640,455,839,098-852,230,251,028)<br>168,318,838,021     | (688,051,147,017-921,475,940,504)<br>168,479,279,519     | (741,388,415,237-1,010,432,626,677)<br>160,724,987,660                   |
| Andean Latin America | Injuries   | (200,277,381,920-248,344,984,997)<br>416,720,452,025     | (194,057,742,592-226,036,897,182)<br>384,141,903,368     | (174,128,502                                             |                                                          |                                                          |                                                                          |

**Appendix Table 3. DALYs for all causes and level 1 cause groups by location for 1990 - 2015, both sexes combined.**

|                     | Cause      | 1990                                                       | 1995                                                       | 2000                                                       | 2005                                                       | 2010                                                       | 2015                                                       |
|---------------------|------------|------------------------------------------------------------|------------------------------------------------------------|------------------------------------------------------------|------------------------------------------------------------|------------------------------------------------------------|------------------------------------------------------------|
| Ecuador             | Injuries   | 46,716,729.010<br>(44,320,357.120-49,482,789.454)          | 52,378,560.142<br>(49,443,421.813-55,431,097.861)          | 51,659,626.038<br>(48,481,662.519-55,087,203.995)          | 53,149,039.510<br>(49,325,532.780-56,908,005.804)          | 55,624,853.022<br>(51,296,597.939-59,881,399.262)          | 54,540,574.789<br>(49,310,693.756-60,392,632.658)          |
| Peru                | All causes | 899,180,493.929<br>(840,153,629.956-965,350,112.737)       | 795,095,044.346<br>(732,845,710.575-864,441,270.238)       | 793,708,279.827<br>(697,527,983.660-743,902,395.466)       | 624,135,054.547<br>(555,193,474.910-702,375,730.096)       | 622,591,082.583<br>(549,522,508.485-704,707,743.189)       | 628,748,215.173<br>(542,868,455.702-712,452,762.653)       |
| Peru                | Group I    | 421,376,270.114<br>(398,391,981.071-447,820,171.432)       | 325,312,294.786<br>(306,603,323.221-345,258,417.542)       | 223,303,880.696<br>(206,874,507.485-241,286,873.555)       | 177,553,450.370<br>(164,032,071.302-193,261,738.636)       | 130,684,065.711<br>(137,467,128.530-166,152,154.590)       | 132,688,645.713<br>(116,697,203.220-150,203,818.884)       |
| Peru                | NCD        | 365,070,893.258<br>(320,140,305.650-413,937,802.625)       | 371,725,322.977<br>(323,790,577.412-424,318,745.651)       | 368,006,818.010<br>(316,248,310.970-424,703,197.579)       | 378,549,386.995<br>(322,888,765.456-440,610,263.897)       | 403,120,240.549<br>(341,421,456.848-469,994,062.711)       | 431,654,003.898<br>(362,766,219.863-503,932,167.848)       |
| Peru                | Injuries   | 112,733,300.558<br>(95,388,517.136-127,836,871.142)        | 98,057,516.884<br>(85,309,518.315-109,424,387.415)         | 82,397,581.121<br>(74,709,463.184-89,057,661.663)          | 68,232,217.822<br>(62,432,785.428-73,330,528.920)          | 68,786,776.322<br>(63,005,220.633-74,463,357.002)          | 64,405,565.563<br>(57,142,781.741-72,555,817.278)          |
| Caribbean           | All causes | 1,469,216,552.511<br>(1,369,825,081,534-1,581,123,803,911) | 1,452,232,341.988<br>(1,344,930,477,418-1,571,449,753,114) | 1,411,908,952.966<br>(1,289,847,243,383-1,541,727,010,703) | 1,435,658,727.894<br>(1,315,686,994,027-1,574,658,835,890) | 1,433,813,175.436<br>(1,687,061,748,884-4,094,677,891,692) | 1,433,813,175.436<br>(1,285,938,337,460-1,596,450,642,322) |
| Caribbean           | Group I    | 576,292,333.092<br>(538,591,365,647-620,114,849,197)       | 530,906,522.438<br>(495,129,488,819-569,722,895,048)       | 480,867,725.640<br>(448,261,933,743-517,171,284,995)       | 462,421,154.173<br>(432,158,845,227-496,413,038,576)       | 397,861,788.549<br>(367,289,428,214-422,759,842,118)       | 331,695,796.674<br>(292,271,866,131-375,183,930,331)       |
| Caribbean           | NCD        | 722,226,751.130<br>(644,949,552,493-802,617,195,585)       | 758,638,627.456<br>(675,177,145,494-848,744,381,436)       | 782,248,104.556<br>(691,393,250,331-880,626,823,873)       | 824,841,044.466<br>(728,225,996,893-933,025,488,101)       | 887,530,108.961<br>(818,080,329,684-1,002,477,391,402)     | 950,736,530.542<br>(837,057,639,431-1,075,404,246,695)     |
| Caribbean           | Injuries   | 170,697,468.290<br>(146,267,844,663-187,977,353,243)       | 162,687,192.095<br>(143,992,530,862-176,960,101,635)       | 148,793,122.771<br>(133,423,578,863-161,041,037,708)       | 148,396,529.255<br>(133,621,712,756-160,508,375,139)       | 1,564,582,046.322<br>(419,740,445,762-2,832,914,697,803)   | 151,380,848.220<br>(137,330,808,256-166,338,598,481)       |
| Antigua and Barbuda | All causes | 1,629,750.798<br>(1,455,274,154-1,818,400,783)             | 1,856,853.824<br>(1,659,189,655-2,073,255,323)             | 2,051,156.498<br>(1,827,395,660-2,295,113,815)             | 2,066,503.126<br>(1,836,502,546-2,328,994,288)             | 2,101,241.815<br>(1,855,387,088-2,388,872,190)             | 2,209,628.423<br>(1,923,945,553-2,521,424,062)             |
| Antigua and Barbuda | Group I    | 291,426.511<br>(249,029,732-341,534,641)                   | 338,333,477<br>(312,668,905-413,370,087)                   | 432,768.482<br>(380,679,981-492,412,150)                   | 354,865.314<br>(307,033,763-412,013,905)                   | 320,717.784<br>(276,231,753-377,327,738)                   | 313,466.037<br>(265,911,096-377,975,691)                   |
| Antigua and Barbuda | NCD        | 1,195,321.711<br>(1,053,274,184-1,347,567,584)             | 1,344,836.985<br>(1,185,813,500-1,521,236,932)             | 1,459,760.440<br>(1,271,564,971-1,656,485,290)             | 1,504,775.073<br>(1,347,204,456-1,756,583,305)             | 1,616,085.165<br>(1,409,710,332-1,852,653,062)             | 1,740,343.095<br>(1,505,165,716-2,003,607,722)             |
| Antigua and Barbuda | Injuries   | 143,002.576<br>(131,738,568-156,007,239)                   | 153,683.361<br>(141,151,505-167,988,492)                   | 158,627.576<br>(144,271,066-173,623,622)                   | 170,862.739<br>(157,159,279-184,377,381)                   | 164,438.866<br>(148,952,283-179,974,122)                   | 155,819.292<br>(137,930,924-175,889,103)                   |
| The Bahamas         | All causes | 8,436,815.943<br>(7,512,700,208-9,466,247,539)             | 8,921,412,906<br>(8,053,114,690-9,909,296,335)             | 9,339,219,422<br>(8,431,152,283-10,349,089,197)            | 9,918,640,220<br>(8,920,666,118-11,044,796,013)            | 10,937,906,909<br>(9,764,078,231-12,302,633,671)           | 11,538,814,587<br>(10,164,706,990-12,987,570,319)          |
| The Bahamas         | Group I    | 2,003,971.668<br>(1,750,857,629-2,719,327,105)             | 2,159,202.072<br>(1,889,200,117-2,495,436,313)             | 2,151,060.289<br>(1,915,110,912-2,405,364,986)             | 1,997,390.487<br>(1,728,182,075-2,332,598,077)             | 2,021,118.147<br>(1,802,533,071-2,489,059,736)             | 1,808,156.287<br>(1,461,893,298-2,357,038,445)             |
| The Bahamas         | NCD        | 5,080,184.664<br>(4,506,234,951-5,704,911,574)             | 5,992,772.758<br>(4,973,270,619-6,291,395,707)             | 6,008,460.506<br>(5,295,633,553-6,757,423,239)             | 6,680,330.265<br>(5,882,092,982-7,557,839,213)             | 7,453,166.597<br>(6,517,302,198-8,441,261,484)             | 8,435,580.381<br>(7,349,812,342-9,540,389,734)             |
| The Bahamas         | Injuries   | 1,152,659.611<br>(1,053,009,737-1,259,679,197)             | 1,169,438.076<br>(1,051,882,058-1,301,756,155)             | 1,179,698.628<br>(1,037,938,218-1,341,781,546)             | 1,240,919.468<br>(1,106,158,372-1,383,163,066)             | 1,382,622.165<br>(1,210,899,138-1,559,571,672)             | 1,295,077.918<br>(1,109,335,186-1,481,831,214)             |
| Barbados            | All causes | 7,684,343.305<br>(6,816,892,033-8,587,359,680)             | 7,960,523.982<br>(7,093,423,096-8,905,475,687)             | 8,155,027.012<br>(7,250,374,419-9,122,730,601)             | 8,091,084.282<br>(7,169,153,318-9,075,445,630)             | 8,474,726.715<br>(7,561,025,251-9,482,419,250)             | 8,821,752.401<br>(7,754,467,881-9,936,651,740)             |
| Barbados            | Group I    | 1,337,764.697<br>(1,085,504,133-1,633,706,828)             | 1,329,578.498<br>(1,103,081,697-1,603,421,279)             | 1,434,424.977<br>(1,231,943,284-1,673,304,197)             | 1,187,515.544<br>(1,026,403,372-1,376,637,006)             | 1,052,486.729<br>(968,830,458-1,309,813,218)               | 1,052,486.729<br>(868,816,182-1,286,344,774)               |
| Barbados            | NCD        | 5,727,294.371<br>(5,096,018,867-6,418,985,721)             | 6,046,222.849<br>(5,356,657,157-6,811,331,366)             | 6,176,620.813<br>(5,457,705,633-6,975,477,931)             | 6,304,533.328<br>(5,523,209,582-7,152,374,805)             | 7,192,434.170<br>(5,962,564,017-7,633,622,098)             | 7,192,434.170<br>(6,280,052,173-8,207,848,851)             |
| Barbados            | Injuries   | 619,284.237<br>(578,888,427-662,624,519)                   | 584,722.635<br>(544,100,990-628,587,047)                   | 543,981.222<br>(499,689,389-589,586,768)                   | 593,055.410<br>(560,457,821-639,533,978)                   | 594,007.279<br>(550,007,395-637,999,451)                   | 576,831.503<br>(511,423,150-642,710,622)                   |
| Belize              | All causes | 5,870,969.678<br>(5,274,307,651-6,524,448,516)             | 6,063,251.257<br>(5,463,628,159-6,789,175,937)             | 7,298,293,308<br>(6,619,149,081-8,081,120,527)             | 7,669,135.836<br>(6,906,816,571-8,572,841,847)             | 8,516,887.099<br>(7,654,237,201-9,445,443,863)             | 9,365,419.557<br>(8,192,737,806-10,602,110,842)            |
| Belize              | Group I    | 2,215,692.357<br>(1,923,809,939-2,530,679,581)             | 1,858,156.229<br>(1,610,812,925-2,159,020,151)             | 2,075,447.751<br>(1,814,657,920-2,371,017,228)             | 2,078,218.621<br>(1,816,392,436-2,376,034,869)             | 2,001,703.056<br>(1,728,116,352-2,348,969,627)             | 2,084,555.907<br>(1,676,194,963-2,627,606,359)             |
| Belize              | NCD        | 2,907,659.140<br>(2,534,064,008-3,311,343,607)             | 3,384,932.738<br>(2,993,038,998-3,823,951,198)             | 4,032,257.957<br>(3,559,683,567-4,532,553,256)             | 4,320,648.121<br>(3,772,097,889-4,946,713,639)             | 5,150,453.223<br>(4,470,015,112-5,857,534,694)             | 5,854,355.747<br>(4,996,208,199-6,872,298,288)             |
| Belize              | Injuries   | 747,618.181<br>(670,925,929-827,058,578)                   | 820,162.290<br>(754,926,968-892,500,176)                   | 1,190,587.600<br>(1,073,732,705-1,314,983,920)             | 1,269,260.966<br>(1,153,197,900-1,404,649,262)             | 1,364,730.820<br>(1,207,941,123-1,507,861,856)             | 1,426,507.903<br>(1,203,537,119-1,645,219,537)             |
| Bermuda             | All causes | 1,547,513.318<br>(1,400,860,560-1,707,740,869)             | 1,531,487.997<br>(1,373,947,543-1,697,845,408)             | 1,506,900.149<br>(1,341,331,003-1,695,020,331)             | 1,452,470.917<br>(1,274,150,691-1,641,248,269)             | 1,452,476.937<br>(1,272,985,747-1,654,130,783)             | 1,494,135.612<br>(1,303,148,403-1,699,659,294)             |
| Bermuda             | Group I    | 184,309.893<br>(161,160,301-214,234,710)                   | 196,701.904<br>(173,435,488-225,858,613)                   | 223,227.951<br>(199,693,824-251,481,001)                   | 174,603.882<br>(151,897,467-202,820,880)                   | 160,676.602<br>(137,602,761-189,217,725)                   | 154,620.698<br>(130,890,261-183,494,615)                   |
| Bermuda             | NCD        | 1,190,012.817<br>(1,068,195,676-1,320,076,531)             | 1,186,137.342<br>(1,053,191,538-1,318,381,954)             | 1,164,244.666<br>(1,023,766,600-1,315,824,020)             | 1,147,919.915<br>(1,000,286,623-1,309,176,809)             | 1,171,292.515<br>(1,017,552,878-1,338,509,374)             | 1,232,238.722<br>(1,067,488,179-1,409,850,890)             |
| Bermuda             | Injuries   | 173,192.608<br>(161,970,561-185,261,034)                   | 148,648.752<br>(138,185,742-159,662,614)                   | 119,427.532<br>(106,742,363-131,092,761)                   | 129,947.120<br>(118,694,805-142,593,458)                   | 120,507.820<br>(108,585,283-133,781,374)                   | 107,276.192<br>(93,312,719-121,383,112)                    |
| Cuba                | All causes | 278,252,355.775<br>(250,190,254,734-310,327,283,805)       | 286,792,250.137<br>(257,214,326,351-320,869,377,517)       | 283,229,122.671<br>(252,660,899,291-318,536,028,403)       | 284,941,364.892<br>(252,710,270,180-321,841,232,031)       | 295,281,185.383<br>(262,163,697,187-332,935,544,412)       | 313,195,032.803<br>(278,574,920,033-351,925,314,327)       |
| Cuba                | Group I    | 34,952,211.245<br>(30,909,774,985-40,232,547,975)          | 32,376,765.722<br>(28,222,235,123-37,852,690,450)          | 29,120,124.370<br>(25,210,745,656-34,155,200,190)          | 26,732,826.551<br>(23,139,009,335-31,652,301,140)          | 25,956,600.347<br>(22,318,057,807-30,451,625,776)          | 25,956,600.347<br>(22,315,976,495-30,594,830,604)          |
| Cuba                | NCD        | 201,175,287.958<br>(177,728,823,794-226,766,285,787)       | 214,461,111.746<br>(190,006,805,998-241,671,963,301)       | 231,478,547.953<br>(195,519,698,908-250,686,739,365)       | 231,478,547.953<br>(204,444,085,808-262,179,245,064)       | 244,703,549.972<br>(216,219,060,175-276,727,905,609)       | 262,049,811.329<br>(232,212,172,634-295,717,987,926)       |
| Cuba                | Injuries   | 42,124,916.423<br>(40,423,735,052-43,968,445,095)          | 39,954,372.670<br>(38,244,190,365-41,875,028,761)          | 32,440,450.348<br>(30,788,573,720-34,191,846,453)          | 26,720,618.131<br>(25,290,484,448-28,450,337,332)          | 25,188,621.127<br>(23,256,746,126-26,643,950,203)          | 25,188,621.127<br>(23,454,870,502-27,288,372,962)          |
| Dominica            | All causes | 1,933,651.932<br>(1,720,770,777-2,167,698,005)             | 1,883,066.441<br>(1,771,070,616-2,227,275,036)             | 1,883,066.441<br>(1,671,645,122-2,104,954,159)             | 1,922,311.445<br>(1,710,485,631-2,155,992,081)             | 2,058,467.821<br>(1,827,473,865-2,309,745,037)             | 2,214,778.508<br>(1,943,398,313-2,500,788,590)             |
| Dominica            | Group I    | 443,244.464<br>(366,082,598-526,190,049)                   | 421,419.216<br>(357,170,770-494,155,968)                   | 357,545.548<br>(315,832,056-423,717,871)                   | 351,265.669<br>(300,810,624-412,270,654)                   | 356,688.075<br>(299,619,592-430,475,567)                   | 363,862.810<br>(290,313,861-454,940,354)                   |
| Dominica            | NCD        | 1,232,958.676<br>(1,175,098,081-1,507,938,772)             | 1,296,905.683<br>(1,233,045,749-1,577,927,678)             | 1,350,132.257<br>(1,183,893,899-1,526,396,178)             | 1,399,901.993<br>(1,220,085,933-1,578,479,385)             | 1,505,523.217<br>(1,319,829,692-1,707,408,475)             | 1,659,787.529<br>(1,442,300,609-1,878,085,326)             |
| Dominica            | Injuries   | 162,448.792<br>(148,653,771-177,913,793)                   | 168,211.421<br>(154,467,971-183,743,085)                   | 165,387.643<br>(151,059,501-180,262,950)                   | 178,054.684<br>(161,824,160-194,064,832)                   | 196,258.530<br>(176,721,829-214,087,409)                   | 200,127.939<br>(175,797,770-227,564,145)                   |
| Dominican Republic  | All causes | 247,666,552.826<br>(228,620,136,647-268,725,481,686)       | 240,948,281.588<br>(221,432,028,019-264,662,031,947)       | 242,145,052.406<br>(221,537,514,786-270,872,779,679)       | 265,887,393.624<br>(242,040,846,526-293,138,188,684)       | 265,792,646.395<br>(239,424,203,117-296,645,632,095)       | 269,20                                                     |







**Appendix Table 3. DALYs for all causes and level 1 cause groups by location for 1990 - 2015, both sexes combined.**

|                                | Cause      | 1990                                                 | 1995                                                 | 2000                                                 | 2005                                                 | 2010                                                 | 2015                                                 |
|--------------------------------|------------|------------------------------------------------------|------------------------------------------------------|------------------------------------------------------|------------------------------------------------------|------------------------------------------------------|------------------------------------------------------|
| Oceania                        | Injuries   | 38,258,411,697<br>(29,563,961,013-49,190,965,925)    | 42,021,689,082<br>(32,311,460,800-54,667,205,821)    | 47,059,146,025<br>(35,915,504,384-62,145,276,619)    | 50,983,525,612<br>(37,784,291,319-67,500,926,355)    | 52,523,075,982<br>(38,948,723,265-71,514,780,432)    | 53,056,435,166<br>(40,188,934,251-71,478,199,264)    |
| American Samoa                 | All causes | 1,304,686,515<br>(1,169,239,134-1,455,641,925)       | 1,394,089,405<br>(1,238,553,818-1,565,810,652)       | 1,419,193,706<br>(1,253,662,955-1,592,734,902)       | 1,548,221,572<br>(1,372,235,690-1,746,566,978)       | 1,660,909,745<br>(1,448,316,588-1,893,765,003)       | 1,858,611,593<br>(1,577,649,906-2,135,428,107)       |
| American Samoa                 | Group I    | 317,066,728<br>(281,240,008-361,809,140)             | 298,279,853<br>(265,730,959-337,886,671)             | 248,326,809<br>(227,226,326-288,020,362)             | 238,039,309<br>(221,073,452-282,041,531)             | 235,032,309<br>(207,491,799-274,778,663)             | 245,241,706<br>(205,977,129-288,520,496)             |
| American Samoa                 | NCD        | 822,166,608<br>(716,379,033-935,459,658)             | 923,619,431<br>(801,412,500-1,051,891,413)           | 966,462,495<br>(866,599,326-1,132,869,221)           | 1,212,187,769<br>(982,342,013-1,279,762,403)         | 1,425,590,941<br>(1,076,428,987-1,432,036,654)       | 1,425,860,932<br>(1,198,569,503-1,649,802,799)       |
| American Samoa                 | Injuries   | 165,453,179<br>(145,071,147-187,048,506)             | 172,190,120<br>(150,616,903-195,223,825)             | 178,701,994<br>(151,252,145-184,654,806)             | 179,286,495<br>(161,874,129-197,210,052)             | 179,286,495<br>(161,204,813-200,531,201)             | 187,510,955<br>(160,075,394-216,971,598)             |
| Federated States of Micronesia | All causes | 3,651,819,500<br>(2,957,992,158-4,474,763,837)       | 3,715,212,459<br>(2,966,844,308-4,615,742,924)       | 3,409,318,688<br>(2,686,786,340-4,361,213,184)       | 3,159,786,583<br>(2,463,005,185-4,199,518,362)       | 2,971,879,355<br>(2,320,474,363-4,023,601,086)       | 2,950,121,739<br>(2,288,270,807-4,082,100,825)       |
| Federated States of Micronesia | Group I    | 1,275,610,957<br>(1,039,817,041-1,549,924,476)       | 1,134,977,698<br>(902,632,449-1,421,943,906)         | 872,580,038<br>(684,723,224-1,141,271,406)           | 633,176,730<br>(489,129,386-842,986,575)             | 501,585,045<br>(386,041,406-651,554,564)             | 437,606,331<br>(343,262,972-569,174,815)             |
| Federated States of Micronesia | NCD        | 1,960,445,872<br>(1,486,778,048-2,511,364,025)       | 2,163,722,959<br>(1,647,928,382-2,810,863,286)       | 2,146,998,366<br>(1,660,675,910-2,881,413,814)       | 2,165,128,810<br>(1,650,104,643-2,963,910,547)       | 2,137,698,551<br>(1,646,904,645-2,962,221,588)       | 2,184,595,168<br>(1,668,865,232-3,058,008,117)       |
| Federated States of Micronesia | Injuries   | 415,762,671<br>(297,246,881-554,645,563)             | 416,511,803<br>(293,548,376-567,423,478)             | 389,740,283<br>(277,669,483-531,274,948)             | 361,481,043<br>(257,164,570-514,309,182)             | 332,595,758<br>(242,277,534-489,588,622)             | 327,920,239<br>(236,328,876-492,187,085)             |
| Fiji                           | All causes | 25,729,096,930<br>(22,413,161,087-29,360,089,660)    | 28,472,148,358<br>(25,012,914,155-32,109,956,755)    | 31,298,581,741<br>(27,933,509,768-34,818,339,398)    | 33,034,805,065<br>(29,621,533,311-36,582,303,140)    | 34,387,043,039<br>(30,492,365,690-38,521,604,243)    | 35,887,960,687<br>(31,221,005,316-41,025,020,962)    |
| Fiji                           | Group I    | 7,076,752,180<br>(5,752,232,764-8,748,027,726)       | 7,032,653,771<br>(5,781,374,783-8,645,189,789)       | 7,345,108,977<br>(6,168,546,728-8,693,760,777)       | 7,083,971,960<br>(5,933,449,264-8,424,762,892)       | 7,323,591,996<br>(5,501,579,677-8,276,368,314)       | 6,353,837,998<br>(4,993,229,068-8,268,619,701)       |
| Fiji                           | NCD        | 16,242,857,200<br>(14,254,121,752-18,679,217,863)    | 18,787,156,146<br>(16,494,570,498-21,317,097,854)    | 20,938,074,423<br>(18,627,581,664-23,310,914,702)    | 22,741,628,727<br>(20,349,054,637-25,217,581,468)    | 24,676,004,560<br>(22,041,036,976-27,646,899,768)    | 26,447,869,922<br>(22,981,389,974-30,231,186,615)    |
| Fiji                           | Injuries   | 2,409,487,550<br>(2,025,324,682-2,814,458,881)       | 2,652,338,440<br>(2,324,993,152-3,002,768,190)       | 3,015,399,341<br>(2,706,567,448-3,308,659,818)       | 3,209,204,378<br>(2,867,021,450-3,578,876,068)       | 2,978,446,483<br>(2,619,128,911-3,397,414,204)       | 3,086,252,766<br>(2,605,677,979-3,628,326,884)       |
| Guam                           | All causes | 3,170,339,791<br>(2,829,425,832-3,541,980,149)       | 3,523,054,456<br>(3,138,336,579-3,958,242,893)       | 3,796,597,312<br>(3,357,419,709-4,292,732,716)       | 4,248,984,907<br>(3,748,008,885-4,771,794,454)       | 4,952,390,219<br>(4,372,923,448-5,546,982,611)       | 5,502,983,348<br>(4,818,006,536-6,243,739,163)       |
| Guam                           | Group I    | 515,131,209<br>(450,418,351-591,763,434)             | 496,510,077<br>(438,447,135-567,268,322)             | 510,629,789<br>(450,169,220-583,074,470)             | 580,393,465<br>(488,447,348-713,672,062)             | 643,089,733<br>(533,590,318-818,725,764)             | 645,744,210<br>(523,147,114-801,203,499)             |
| Guam                           | NCD        | 2,224,549,713<br>(1,957,249,504-2,522,673,488)       | 2,554,126,837<br>(2,228,339,033-2,907,900,872)       | 2,855,968,500<br>(2,500,054,010-3,245,081,881)       | 3,215,107,479<br>(2,819,366,283-3,612,068,490)       | 3,798,620,568<br>(3,352,339,402-4,261,985,589)       | 4,307,138,713<br>(3,757,928,988-4,905,076,829)       |
| Guam                           | Injuries   | 430,658,869<br>(381,537,100-475,982,380)             | 472,417,522<br>(420,343,200-524,688,011)             | 429,999,013<br>(380,177,655-473,597,041)             | 453,483,963<br>(405,536,519-501,871,890)             | 510,679,878<br>(463,286,599-566,606,875)             | 550,100,425<br>(468,612,508-632,847,205)             |
| Kiribati                       | All causes | 4,455,520,990<br>(3,968,198,541-4,954,208,722)       | 4,370,783,606<br>(3,955,982,005-4,796,438,683)       | 4,393,578,613<br>(4,007,939,779-4,822,443,020)       | 4,592,182,612<br>(4,092,352,440-5,135,764,583)       | 4,982,602,194<br>(4,060,049,282-5,293,290,944)       | 4,895,602,194<br>(4,156,170,106-5,737,922,641)       |
| Kiribati                       | Group I    | 2,325,211,169<br>(1,972,303,244-2,710,334,279)       | 2,102,288,632<br>(1,846,702,550-2,383,780,583)       | 1,856,557,117<br>(1,641,125,019-2,096,681,986)       | 1,823,717,782<br>(1,537,352,908-2,163,550,337)       | 1,703,211,154<br>(1,315,671,308-2,180,351,563)       | 1,571,476,333<br>(1,152,888,210-2,161,725,230)       |
| Kiribati                       | NCD        | 1,795,281,191<br>(1,584,248,150-2,010,753,113)       | 1,921,317,245<br>(1,713,152,082-2,138,889,922)       | 2,156,146,035<br>(1,928,337,626-2,398,862,153)       | 2,342,337,323<br>(2,069,269,868-2,614,883,993)       | 2,564,534,609<br>(2,237,337,284-2,911,655,512)       | 2,838,392,379<br>(2,440,885,131-3,235,693,396)       |
| Kiribati                       | Injuries   | 335,028,630<br>(282,925,550-387,097,896)             | 347,177,729<br>(300,577,437-393,473,362)             | 380,875,461<br>(326,361,528-430,001,262)             | 426,127,507<br>(347,023,549-492,282,369)             | 467,265,622<br>(364,676,847-562,153,603)             | 485,733,482<br>(373,019,594-611,142)                 |
| Marshall Islands               | All causes | 1,920,146,438<br>(1,663,762,051-2,196,189,429)       | 1,862,258,715<br>(1,644,351,419-2,084,685,526)       | 2,132,649,662<br>(1,834,466,078-2,479,091,953)       | 2,309,999,362<br>(2,016,338,247-2,594,939,389)       | 2,374,191,660<br>(2,055,369,813-2,742,803,748)       | 2,426,300,035<br>(2,103,464,739-2,783,748,746)       |
| Marshall Islands               | Group I    | 767,656,630<br>(610,977,868-940,164,671)             | 640,043,077<br>(513,446,735-817,921,359)             | 723,851,566<br>(548,774,384-968,642,277)             | 746,396,142<br>(530,516,418-870,666,889)             | 874,970,823<br>(630,516,778-1,124,368,240)           | 891,466,933<br>(617,006,807-1,167,928,063)           |
| Marshall Islands               | NCD        | 938,313,533<br>(815,132,109-1,072,089,015)           | 1,016,291,366<br>(880,762,809-1,149,971,349)         | 1,170,212,727<br>(998,559,141-1,327,913,138)         | 1,377,513,511<br>(1,187,594,419-1,553,278,142)       | 1,542,850,841<br>(1,334,111,967-1,754,441,699)       | 1,682,898,160<br>(1,446,116,974-1,917,663,749)       |
| Marshall Islands               | Injuries   | 214,176,275<br>(174,818,899-256,396,080)             | 205,924,271<br>(163,780,284-238,194,612)             | 238,885,369<br>(185,976,921-289,421,394)             | 258,089,709<br>(207,548,917-307,164,717)             | 256,369,996<br>(210,284,367-303,625,358)             | 251,934,941<br>(208,732,260-296,798,828)             |
| Northern Mariana Islands       | All causes | 962,591,787<br>(829,465,701-1,121,646,751)           | 1,163,726,845<br>(993,459,365-1,339,108,821)         | 1,254,539,558<br>(1,075,325,525-1,443,153,952)       | 1,461,039,420<br>(1,259,405,160-1,681,939,242)       | 1,708,511,872<br>(1,473,499,675-1,979,954,890)       | 2,060,375,634<br>(1,768,879,307-2,400,916,988)       |
| Northern Mariana Islands       | Group I    | 177,248,114<br>(128,207,815-251,669,757)             | 190,184,502<br>(145,892,552-251,341,017)             | 173,416,712<br>(144,853,474-207,509,420)             | 179,244,824<br>(151,723,373-213,435,589)             | 184,724,529<br>(155,255,930-221,306,109)             | 221,949,255<br>(180,817,540-273,899,942)             |
| Northern Mariana Islands       | NCD        | 636,340,045<br>(543,173,699-744,047,495)             | 810,467,341<br>(685,570,142-947,219,541)             | 910,363,832<br>(764,309,816-1,058,635,770)           | 1,072,076,019<br>(902,914,942-1,253,155,003)         | 1,286,703,423<br>(1,086,465,969-1,520,858,172)       | 1,555,893,897<br>(1,312,189,502-1,834,298,146)       |
| Northern Mariana Islands       | Injuries   | 149,003,628<br>(126,482,164-173,376,116)             | 163,075,002<br>(143,782,519-185,213,391)             | 170,599,019<br>(153,836,827-191,101,425)             | 209,718,778<br>(189,642,589-230,768,143)             | 237,089,010<br>(210,067,777-265,482,734)             | 282,532,482<br>(242,883,605-330,870,197)             |
| Papua New Guinea               | All causes | 265,470,823,861<br>(226,089,626,190-315,342,652,295) | 288,812,782,457<br>(240,660,263,571-346,295,509,990) | 315,415,997,902<br>(254,205,499,678-386,578,269,035) | 354,113,029,960<br>(268,085,698,799-434,335,688,305) | 355,400,726,868<br>(273,682,623,041-461,678,200,634) | 355,400,726,868<br>(273,392,230,043-469,142,560,157) |
| Papua New Guinea               | Group I    | 136,742,222,459<br>(118,401,985,618-157,090,304,724) | 141,921,548,205<br>(120,444,770,485-168,470,317,328) | 144,035,926,294<br>(115,406,983,817-176,795,063,871) | 146,811,149,902<br>(114,720,858,489-185,154,029,957) | 122,796,421,147<br>(104,883,277,825-182,265,472,180) | 122,796,421,147<br>(93,931,551,914-165,962,637,392)  |
| Papua New Guinea               | NCD        | 100,860,545,262<br>(78,127,568,558-127,541,661,039)  | 115,987,638,938<br>(88,839,685,672-147,539,687,810)  | 136,421,713,790<br>(103,673,455,487-174,081,903,747) | 157,967,162,303<br>(118,125,805,597-206,965,522,403) | 177,003,895,554<br>(131,767,934,995-240,327,505,199) | 192,268,433,766<br>(145,058,215,611-259,827,231,035) |
| Papua New Guinea               | Injuries   | 27,868,056,140<br>(20,019,249,942-37,581,936,255)    | 30,903,595,314<br>(21,818,761,047-42,417,401,004)    | 34,958,357,818<br>(24,583,471,960-48,768,408,172)    | 38,334,717,954<br>(26,236,023,306-53,118,149,144)    | 40,335,871,955<br>(27,870,261,375-57,979,607,043)    | 40,335,871,955<br>(28,648,587,084-58,029,543,705)    |
| Samoa                          | All causes | 4,644,319,385<br>(3,919,925,222-5,534,482,365)       | 4,571,427,495<br>(3,839,526,336-5,427,560,072)       | 4,520,625,044<br>(3,801,026,204-5,312,298,610)       | 4,520,625,044<br>(3,836,766,426-5,273,190,721)       | 4,520,625,044<br>(3,877,919,841-5,236,089,102)       | 4,615,603,754<br>(3,884,290,009-5,400,166,647)       |
| Samoa                          | Group I    | 1,223,388,219<br>(865,822,582-1,794,901,692)         | 1,081,603,072<br>(773,474,164-1,615,848,732)         | 969,104,511<br>(690,803,457-1,484,934,532)           | 874,192,743<br>(630,064,223-1,289,251,532)           | 768,358,809<br>(577,248,040-1,096,802,035)           | 692,872,720<br>(525,366,865-971,573,517)             |
| Samoa                          | NCD        | 2,866,124,213<br>(2,410,171,291-3,345,988,729)       | 2,970,215,759<br>(2,492,551,132-3,475,478,071)       | 3,046,927,497<br>(2,559,011,182-3,560,131,232)       | 3,175,923,765<br>(2,688,126,460-3,655,418,513)       | 3,289,010,637<br>(2,809,075,253-3,806,391,354)       | 3,147,633,149<br>(2,908,377,586-3,034,185,592)       |
| Samoa                          | Injuries   | 552,806,954<br>(435,072,503-686,742,043)             | 519,608,664<br>(395,317,613-659,341,036)             | 495,505,096<br>(383,073,263-622,984,265)             | 470,498,896<br>(375,766,668-570,650,670)             | 461,743,975<br>(375,766,668-570,650,670)             | 449,097,885<br>(361,101,905-548,203,082)             |
| Solomon Islands                | All causes | 14,612,237,876<br>(11,815,518,879-17,867,766,617)    | 15,384,913,028<br>(12,292,080,111-19,136,779,340)    | 16,941,057,713<br>(13,483,238,047-21,159,952,031)    | 17,920,563,998<br>(14,882,727,015-21,854,814,300)    | 20,191,345,311<br>(15,430,967,953-26,117,655,738)    | 20,765,725,302<br>(15,854,729,400-27,488,491,140)    |
| Solomon Islands                | Group I    | 6,042,998,704<br>(4,861,261,139-7,345,687,145)       | 5,692,407,219<br>(4,551,027,733-7,129,909,414)       | 5,539,916,061<br>(4,464,348,852-6,948,634,992)       | 5,890,920,048<br>(4,649,385,051-7,428,298,276)       | 5,325,250,586<br>(4,122,344,663-6,714,672,100)       | 4,581,947,179<br>(3,525,577,396-5,850,790,211)       |
| Solomon Islands                | NCD        | 6,989,553,769<br>(5,311,730,756-9,069,988,254)       | 7,956,014,838<br>(5,999,354,145-10,415,3             |                                                      |                                                      |                                                      |                                                      |

Appendix Table 3. DALYs for all causes and level 1 cause groups by location for 1990 - 2015, both sexes combined.

|                              | Cause      | 1990                                                          | 1995                                                          | 2000                                                          | 2005                                                          | 2010                                                          | 2015                                                          |
|------------------------------|------------|---------------------------------------------------------------|---------------------------------------------------------------|---------------------------------------------------------------|---------------------------------------------------------------|---------------------------------------------------------------|---------------------------------------------------------------|
| Tonga                        | NCD        | 1,683,167,696<br>(1,456,637,900-1,934,026,707)                | 1,784,917,466<br>(1,575,403,028-2,024,518,641)                | 1,883,265,074<br>(1,667,213,506-2,121,096,411)                | 1,973,778,890<br>(1,737,585,494-2,227,548,648)                | 2,001,564,170<br>(1,729,861,824-2,287,047,337)                | 2,030,982,995<br>(1,736,577,085-2,358,560,450)                |
| Tonga                        | Injuries   | 385,620,300<br>(317,806,685-455,765,768)                      | 374,633,067<br>(321,789,525-439,613,242)                      | 376,626,456<br>(330,234,099-429,496,327)                      | 376,937,266<br>(330,701,767-432,786,008)                      | 363,775,076<br>(312,074,392-430,320,396)                      | 341,353,803<br>(286,430,857-408,144,979)                      |
| Vanuatu                      | All causes | 6,221,038,524<br>(5,118,601,247-7,119,835,889)                | 6,894,749,716<br>(5,458,141,973-8,694,223,816)                | 7,520,340,971<br>(5,965,271,221-9,454,135,475)                | 8,445,765,126<br>(6,657,693,344-10,708,279,013)               | 9,000,795,836<br>(6,990,598,912-11,917,546,833)               | 9,704,625,498<br>(7,630,433,081-12,623,062,473)               |
| Vanuatu                      | Group I    | 2,290,218,103<br>(1,867,388,425-2,781,589,516)                | 2,340,327,341<br>(1,915,805,952-2,906,374,435)                | 2,439,529,465<br>(2,012,812,949-3,108,808,260)                | 2,619,896,707<br>(2,118,274,643-3,277,680,997)                | 2,366,570,220<br>(1,883,920,418-3,034,886,869)                | 2,193,448,181<br>(1,722,211,339-2,827,721,393)                |
| Vanuatu                      | NCD        | 3,283,345,478<br>(2,541,689,751-4,264,380,373)                | 3,808,718,124<br>(2,831,390,882-5,138,701,799)                | 4,222,874,608<br>(3,057,194,906-5,514,285,460)                | 4,857,112,304<br>(3,558,363,553-6,502,929,325)                | 5,600,602,391<br>(4,122,346,997-7,698,193,977)                | 6,372,532,091<br>(4,784,041,978-8,611,230,392)                |
| Vanuatu                      | Injuries   | 677,474,943<br>(454,387,561-901,265,569)                      | 745,704,251<br>(488,185,188-1,043,344,620)                    | 877,911,506<br>(600,373,685-1,207,085,129)                    | 968,756,114<br>(657,713,781-1,338,112,892)                    | 1,033,623,225<br>(732,320,538-1,462,734,168)                  | 1,138,645,227<br>(861,407,929-1,519,556,385)                  |
| North Africa and Middle East | All causes | 15,771,061,378,803<br>(14,840,435,647,930-16,780,281,117,606) | 15,900,922,966,231<br>(14,004,600,741,830-16,144,556,728,674) | 14,558,423,150,877<br>(13,379,809,557,090-15,793,116,352,957) | 14,811,490,814,082<br>(13,526,444,843,446-16,197,008,735,001) | 15,194,750,082,863<br>(13,729,200,985,037-16,690,884,377,501) | 16,565,717,102,355<br>(14,745,642,512,766-18,374,047,034,872) |
| North Africa and Middle East | Group I    | 6,764,757,118,732<br>(6,054,381,406,375-7,283,013,090,860)    | 5,759,624,107,961<br>(5,202,243,302,912-6,210,784,090,006)    | 4,897,691,838<br>(4,474,063,389,611-5,281,168,975,204)        | 4,267,857,532,644<br>(3,890,182,960,972-4,636,670,541,825)    | 3,843,332,696,614<br>(3,485,307,791,117-4,189,508,445,838)    | 3,399,729,449,472<br>(3,073,332,722,848-3,775,367,232,554)    |
| North Africa and Middle East | NCD        | 6,823,506,454,793<br>(6,044,700,987,570-7,119,840,493,630)    | 7,352,832,076,499<br>(6,493,053,859,644-8,230,924,695,020)    | 7,762,528,260,324<br>(6,833,466,975,193-8,713,878,536,592)    | 8,513,154,362,368<br>(7,463,492,491,869-9,556,665,241,447)    | 9,340,073,083,139<br>(8,137,284,337,546-10,513,765,739,203)   | 10,282,792,771,222<br>(8,975,072,325,813-11,610,660,609,762)  |
| North Africa and Middle East | Injuries   | 2,182,797,805,279<br>(1,882,540,576,004-2,443,954,406,927)    | 1,938,466,781,771<br>(1,726,313,423,307-2,125,682,288,132)    | 1,898,825,573,715<br>(1,725,500,860,727-2,061,293,667,858)    | 2,030,478,919,069<br>(1,850,632,835,185-2,205,348,815,028)    | 2,011,344,283,110<br>(1,846,689,208,209-2,182,432,622,578)    | 2,883,194,881,661<br>(2,393,618,696,603-3,364,925,267,812)    |
| Afghanistan                  | All causes | 1,344,926,896,397<br>(1,237,205,007,525-1,451,943,684,936)    | 1,699,334,849,408<br>(1,562,264,543,638-1,835,857,973,695)    | 1,923,529,240,780<br>(1,775,343,134,374-2,091,625,497,900)    | 2,017,921,927,410<br>(1,825,370,501,110-2,220,263,611,620)    | 1,994,814,045,801<br>(1,782,084,584,793-2,222,757,988,468)    | 2,169,145,897,101<br>(1,890,789,566,113-2,472,361,927,739)    |
| Afghanistan                  | Group I    | 808,333,125,644<br>(666,738,780,430-947,417,227,220)          | 950,053,119,514<br>(796,501,647,010-1,109,058,725,260)        | 1,056,748,954,499<br>(879,995,833,004-1,221,952,905,568)      | 982,369,705,695<br>(818,217,252,520-1,103,575,711,786)        | 871,054,616,015<br>(722,127,345,091-1,028,775,573,123)        | 737,030,347,343<br>(607,736,695,193-875,131,904,629)          |
| Afghanistan                  | NCD        | 328,182,545,897<br>(244,590,362,505-447,258,252,188)          | 458,594,626,911<br>(350,444,088,664-610,245,895,261)          | 541,984,272,476<br>(421,471,262,030-711,452,867,741)          | 662,378,887,028<br>(533,947,413,531-841,594,555,926)          | 723,115,494,086<br>(580,406,974,810-898,489,116,811)          | 819,773,117,392<br>(663,768,156,598-994,484,715,334)          |
| Afghanistan                  | Injuries   | 208,077,225,576<br>(140,685,950,277-266,570,501,855)          | 290,687,102,948<br>(209,340,325,699-365,440,488,631)          | 324,796,015,805<br>(238,960,345,621-408,663,221,246)          | 373,172,334,852<br>(308,409,639,730-444,297,555,598)          | 400,643,935,700<br>(331,610,433,929-481,784,366,962)          | 612,324,378,366<br>(450,463,672,673-779,517,688)              |
| Algeria                      | All causes | 890,735,554,030<br>(816,120,831,997-970,031,961,698)          | 840,508,808,470<br>(762,077,507,345-929,465,085,797)          | 811,531,977,112<br>(706,015,647,806-882,880,389,116)          | 880,579,016,501<br>(717,715,908,647-915,844,117,946)          | 880,579,016,501<br>(774,482,581,591-991,244,502,634)          | 952,793,617,829<br>(827,277,888,042-1,081,222,187,916)        |
| Algeria                      | Group I    | 353,855,732,512<br>(312,593,804,151-394,351,738,591)          | 268,121,916,561<br>(238,477,413,758-300,019,369,120)          | 203,526,750,588<br>(182,172,590,824-226,018,100,728)          | 190,764,692,493<br>(167,533,576,540-216,281,671,335)          | 202,847,053,024<br>(174,052,740,539-233,642,284,312)          | 194,171,186,955<br>(163,553,270,954-231,868,707,700)          |
| Algeria                      | NCD        | 424,180,938,444<br>(371,074,835,360-484,293,760,730)          | 447,611,864,294<br>(389,748,759,001-514,180,507,710)          | 480,646,067,245<br>(415,804,209,705-553,388,072,490)          | 527,451,040,109<br>(453,663,034,313-609,687,085,974)          | 585,421,264,132<br>(502,900,530,781-674,591,185,779)          | 661,537,162,551<br>(565,400,529,811-762,128,687,422)          |
| Algeria                      | Injuries   | 112,698,883,074<br>(91,745,868,687-131,383,517,401)           | 124,775,027,615<br>(105,069,927,737-146,014,853,109)          | 108,310,216,527<br>(94,621,508,606-115,769,744,528)           | 93,316,244,510<br>(83,601,281,912-103,272,193,457)            | 92,310,699,345<br>(83,103,225,300-101,689,086,791)            | 97,885,268,323<br>(85,829,226,018-108,614,908,021)            |
| Bahrain                      | All causes | 12,541,514,967<br>(11,113,606,628-14,072,260,762)             | 13,332,307,125<br>(11,657,087,226-15,079,380,967)             | 14,821,550,676<br>(12,816,552,650-16,859,759,503)             | 16,541,801,246<br>(14,171,136,299-19,175,542,393)             | 22,024,397,590<br>(18,550,769,393-25,946,135,701)             | 23,742,699,116<br>(19,720,277,027-28,067,934,117)             |
| Bahrain                      | Group I    | 2,523,295,295<br>(2,269,521,938-2,860,975,299)                | 2,135,586,949<br>(1,899,338,062-2,454,663,291)                | 1,904,776,574<br>(1,657,704,467-2,206,194,295)                | 2,030,283,718<br>(1,740,346,987-2,390,022,523)                | 2,312,136,445<br>(1,918,002,581-2,772,159,179)                | 2,312,136,445<br>(1,914,478,838-2,833,276,022)                |
| Bahrain                      | NCD        | 8,294,230,692<br>(7,201,558,161-9,491,095,799)                | 9,206,660,667<br>(7,933,615,915-10,542,709,832)               | 10,247,548,006<br>(8,754,157,731-11,800,663,557)              | 12,367,438,252<br>(10,514,872,532-14,405,932,210)             | 17,282,146,960<br>(14,280,830,067-20,521,691,033)             | 18,938,341,067<br>(15,521,239,771-22,605,465,138)             |
| Bahrain                      | Injuries   | 4,247,284,275<br>(1,533,335,124-1,938,776,379)                | 4,125,646,458<br>(1,749,911,845-2,253,458,128)                | 4,573,962,670<br>(2,131,628,585-3,206,407,351)                | 4,174,362,994<br>(1,861,234,089-2,469,322,643)                | 4,742,550,630<br>(2,316,545,813-2,781,360,583)                | 4,814,357,050<br>(2,058,559,814-2,960,309,694)                |
| Egypt                        | All causes | 2,788,394,831,203<br>(2,611,105,776,712-2,973,030,583,210)    | 2,431,816,409,797<br>(2,251,038,506,445-2,624,782,714,202)    | 2,206,008,368,982<br>(2,018,215,102,445-2,410,328,866,813)    | 2,202,484,583,577<br>(2,091,655,226,484-2,355,521,972,242)    | 2,547,607,117,575<br>(2,316,369,954,100-2,805,911,236,751)    | 2,614,594,267,944<br>(2,307,969,746,661-2,926,793,442,284)    |
| Egypt                        | Group I    | 1,254,892,997,819<br>(1,089,282,234,101-1,353,552,041,186)    | 877,140,899,520<br>(785,796,777,463-955,311,176,691)          | 613,446,934,307<br>(561,036,180,748-671,696,087,170)          | 530,092,390,170<br>(473,316,555,997-595,931,521,260)          | 516,560,142,485<br>(457,073,962,450-583,640,859,605)          | 459,468,139,929<br>(374,779,912,966-566,592,643,983)          |
| Egypt                        | NCD        | 1,379,314,189,106<br>(1,242,874,600,456-1,546,780,526,515)    | 1,393,685,585,509<br>(1,264,801,945,041-1,536,960,066,741)    | 1,428,335,498,043<br>(1,282,982,840,211-1,580,523,390,182)    | 1,608,243,962,487<br>(1,447,397,681,680-1,783,280,053,009)    | 1,854,105,060,666<br>(1,675,550,314,888-2,054,141,666,883)    | 1,960,678,081,914<br>(1,742,560,496,578-2,181,379,202,947)    |
| Egypt                        | Injuries   | 154,187,644,278<br>(134,657,679,113-181,255,664,901)          | 160,989,924,768<br>(145,759,032,423-177,927,485,423)          | 162,225,936,539<br>(151,822,008,342-176,846,889,258)          | 163,818,490,920<br>(150,888,847,158-176,673,406,295)          | 176,941,914,425<br>(164,284,322,124-190,865,896,425)          | 194,450,045,651<br>(174,563,534,067-210,845,386)              |
| Iran                         | All causes | 2,591,769,861,658<br>(2,325,041,175,290-2,854,638,475,626)    | 1,912,397,584,871<br>(1,689,613,491,532-2,135,410,883,298)    | 1,802,559,605,246<br>(1,596,699,080,626-2,028,204,940,972)    | 1,894,999,981,043<br>(1,643,832,991,665-2,173,884,949,723)    | 1,868,430,619,240<br>(1,590,228,251,613-2,164,475,137,303)    | 1,918,230,400,866<br>(1,621,939,742,422-2,232,608,862,759)    |
| Iran                         | Group I    | 781,687,583,440<br>(633,356,443,037-970,146,340,206)          | 451,396,090,526<br>(371,738,043,928-569,616,750,102)          | 306,264,977,247<br>(250,988,783,344-377,136,782,782)          | 255,250,350,760<br>(207,653,448,326-310,596,455,536)          | 211,543,313,481<br>(172,770,071,101-252,287,410,697)          | 183,054,503,996<br>(147,980,217,868-233,824,474,809)          |
| Iran                         | NCD        | 1,088,539,451,237<br>(904,242,511,499-1,254,429,307,675)      | 1,084,363,326,866<br>(910,243,402,248-1,246,440,927,073)      | 1,137,307,380,134<br>(976,019,785,029-1,311,417,336,726)      | 1,240,557,265,082<br>(1,052,602,179,900-1,445,741,866,176)    | 1,304,618,324,431<br>(1,095,218,936,731-1,528,121,529,101)    | 1,420,789,865,696<br>(1,182,911,758,736-1,675,361,961,620)    |
| Iran                         | Injuries   | 721,542,826,981<br>(548,751,481,747-894,043,406,379)          | 376,638,167,480<br>(331,298,686,184-426,706,902,292)          | 358,987,247,634<br>(325,846,870,314-397,340,896,377)          | 399,192,365,200<br>(345,000,596,065-464,172,043,146)          | 352,268,981,327<br>(300,932,394,620-426,893,219,400)          | 314,386,030,393<br>(258,177,575,906-382,390,820,069)          |
| Iraq                         | All causes | 739,129,097,551<br>(674,591,094,661-807,320,524,615)          | 833,588,220,900<br>(758,198,107,254-913,516,196,477)          | 900,422,500,829<br>(813,764,086,494-992,344,867,722)          | 1,030,530,241,536<br>(913,764,121,046-1,155,898,822,254)      | 1,049,445,992,919<br>(918,913,590,726-1,193,665,041,932)      | 1,242,699,448,865<br>(1,066,001,467,744-1,428,634,601,770)    |
| Iraq                         | Group I    | 274,148,312,682<br>(236,457,719,165-308,382,231,218)          | 292,977,345,892<br>(257,502,871,756-331,271,306,542)          | 286,494,590,689<br>(251,043,568,356-321,217,781,551)          | 279,065,918,916<br>(243,779,196,323-308,780,720,491)          | 274,016,043,093<br>(234,982,139,002-309,147,797,942)          | 252,000,462,613<br>(208,506,883,277-296,971,673,980)          |
| Iraq                         | NCD        | 347,376,002,429<br>(292,742,408,800-402,944,452,406)          | 406,078,166,851<br>(346,107,126,778-469,901,053,153)          | 471,819,804,613<br>(408,347,245,045-542,201,510,876)          | 533,040,692,328<br>(459,160,048,192-614,651,772,647)          | 589,025,817,814<br>(500,465,123,246-686,671,828,219)          | 667,698,851,731<br>(564,451,806,462-784,231,418,071)          |
| Iraq                         | Injuries   | 117,604,782,439<br>(100,506,466,999-137,490,649,028)          | 134,532,707,261<br>(113,963,738,726-155,005,799,065)          | 142,108,105,526<br>(119,020,472,984-163,349,848,566)          | 218,423,630,292<br>(173,467,882,594-264,129,772,459)          | 186,404,132,011<br>(152,096,273,346-219,293,486,868)          | 323,000,134,521<br>(226,006,128,622-416,372,100,391)          |
| Jordan                       | All causes | 93,449,107,267<br>(84,617,108,125-103,182,438,317)            | 109,641,592,987<br>(98,160,936,490-122,599,297,166)           | 113,742,808,410<br>(101,373,832,643-127,445,142,052)          | 118,007,497,540<br>(104,590,854,297-133,076,020,186)          | 123,546,836,727                                               |                                                               |



**Appendix Table 3. DALYs for all causes and level 1 cause groups by location for 1990 - 2015, both sexes combined.**

|              | Cause      | 1990                                                       | 1995                                                       | 2000                                                       | 2005                                                       | 2010                                                       | 2015                                                       |
|--------------|------------|------------------------------------------------------------|------------------------------------------------------------|------------------------------------------------------------|------------------------------------------------------------|------------------------------------------------------------|------------------------------------------------------------|
| Lebanon      | Group I    | 17,665,902.916<br>(15,151,457,364-21,038,906,548)          | 15,177,948.122<br>(12,674,009,805-18,978,029,852)          | 12,418,647.475<br>(10,140,381,301-16,024,909,623)          | 9,772,540.737<br>(7,858,436,690-12,611,541,943)            | 8,784,046.164<br>(7,013,525,721-11,245,845,627)            | 10,378,314.850<br>(8,214,231,418-13,330,755,214)           |
| Lebanon      | NCD        | 56,284,032.824<br>(48,865,681,560-64,900,672,190)          | 57,029,404.405<br>(49,782,482,979-65,297,455,049)          | 56,679,723.966<br>(48,283,273,955-65,522,050,798)          | 66,578,909.351<br>(55,856,997,619-77,672,881,605)          | 75,718,552.395<br>(62,416,821,807-89,633,195,437)          | 98,392,222.143<br>(80,359,453,507-116,881,406,013)         |
| Lebanon      | Injuries   | 30,332,055.261<br>(24,778,341,469-37,543,475,353)          | 17,822,097.746<br>(13,111,756,588-24,096,069,728)          | 15,961,781.024<br>(11,421,358,398-21,777,551,704)          | 15,956,765.844<br>(11,269,251,587-22,103,780,253)          | 14,938,575.250<br>(10,821,559,564-20,726,237,152)          | 17,461,663.409<br>(12,632,077,820-23,825,679,547)          |
| Libya        | All causes | 118,497,848.271<br>(106,628,254,412-131,107,719,307)       | 114,831,252.734<br>(102,118,988,261-128,642,423,177)       | 121,587,943.128<br>(107,491,793,869-136,652,036,992)       | 129,267,099.828<br>(113,577,127,808-146,275,575,001)       | 135,788,528.001<br>(118,370,306,204-154,867,143,220)       | 160,356,689.264<br>(136,552,830,878-184,288,655,082)       |
| Libya        | Group I    | 22,825,481.251<br>(28,334,439,217-37,123,848,770)          | 25,243,634.865<br>(22,055,399,561-29,358,091,891)          | 22,888,820.482<br>(19,457,278,674-26,927,640,998)          | 22,059,234.296<br>(18,627,536,400-27,404,594,949)          | 20,605,613.354<br>(16,678,114,901-25,613,618,344)          | 18,078,191.761<br>(14,473,029,626-22,586,758,527)          |
| Libya        | NCD        | 69,908,838.398<br>(60,742,231,531-79,667,323,601)          | 73,507,023.567<br>(63,673,959,001-84,525,385,180)          | 81,272,346.849<br>(69,955,504,052-93,290,914,399)          | 89,528,083.497<br>(77,243,411,647-102,622,862,907)         | 97,459,051.528<br>(83,435,492,092-112,327,606,078)         | 104,111,985.078<br>(88,444,715,379-120,150,343,022)        |
| Libya        | Injuries   | 16,335,228.621<br>(13,967,761,982-18,581,053,230)          | 16,080,594.303<br>(13,956,102,316-18,124,623,824)          | 17,426,775.798<br>(15,340,262,928-19,297,733,774)          | 17,219,782.054<br>(14,977,967,218-19,181,775,974)          | 17,813,863.119<br>(15,585,800,336-19,937,604,465)          | 38,166,512.244<br>(25,337,938,478-50,891,289,167)          |
| Morocco      | All causes | 1,014,940,961.277<br>(933,869,074,219-1,101,534,523,683)   | 941,971,346.692<br>(855,525,124,178-1,036,235,313,104)     | 874,618,868.831<br>(774,530,952,801-978,838,001,820)       | 874,618,868.831<br>(774,530,952,801-978,838,001,820)       | 891,496,929.585<br>(764,648,135,660-1,034,343,852,616)     | 926,666,052.615<br>(784,470,995,485-1,084,978,781,670)     |
| Morocco      | Group I    | 436,358,259.377<br>(386,826,082,361-472,047,804,804)       | 329,239,931.609<br>(293,416,405,023-359,810,537,416)       | 249,859,025.601<br>(222,770,979,627-277,492,455,281)       | 211,305,062.698<br>(183,767,311,435-238,813,131,281)       | 189,331,435.855<br>(161,081,479,393-218,304,934,261)       | 166,990,768.865<br>(139,619,619,306-196,936,310,400)       |
| Morocco      | NCD        | 461,002,331.219<br>(399,201,442,157-528,103,803,995)       | 498,667,546.546<br>(429,294,700,803-571,488,227,869)       | 523,841,605.899<br>(448,720,739,473-600,146,728,486)       | 562,767,435.778<br>(468,385,422,651-652,653,181,633)       | 606,761,866.409<br>(504,328,364,147-717,025,987,958)       | 660,599,016.415<br>(545,573,702-749,200,851,819)           |
| Morocco      | Injuries   | 117,580,370.682<br>(95,713,474,012-136,171,169,978)        | 114,063,868.537<br>(98,094,862,873-129,573,938,671)        | 100,918,237.317<br>(87,918,421,726-115,185,555,780)        | 98,249,873.259<br>(79,405,557,232-109,955,416,592)         | 95,403,627.322<br>(79,366,410,355-115,708,250,775)         | 98,716,267.335<br>(79,788,755,368-122,826,201,050)         |
| Palestine    | All causes | 68,200,513.737<br>(61,470,918,687-75,497,102,231)          | 68,728,209.025<br>(61,347,205,465-76,396,368,179)          | 78,220,557.051<br>(69,439,023,169-87,170,713,135)          | 81,378,393.694<br>(72,727,187,621-90,686,337,400)          | 89,683,213.773<br>(78,823,273,609-101,439,386,237)         | 99,559,130.549<br>(85,116,995,571-115,126,881,106)         |
| Palestine    | Group I    | 25,382,248.246<br>(21,835,259,761-28,549,073,845)          | 22,681,331.920<br>(19,719,970,153-25,529,761,993)          | 21,747,433.260<br>(19,070,935,110-24,345,004,528)          | 21,653,458.303<br>(18,805,849,323-24,589,678,349)          | 21,571,194.027<br>(18,409,592,461-24,593,426,354)          | 21,256,641.923<br>(17,149,505,706-25,986,638,879)          |
| Palestine    | NCD        | 33,007,376.782<br>(27,959,761,989-38,447,963,836)          | 37,373,815.725<br>(31,780,286,688-42,914,543,856)          | 45,816,341.474<br>(37,456,668,305-49,728,095,110)          | 49,710,036.599<br>(42,763,432,140-56,471,589,556)          | 57,821,634.219<br>(49,223,039,977-66,474,506,901)          | 67,489,155.248<br>(56,760,451,765-79,381,607,394)          |
| Palestine    | Injuries   | 9,810,888.709<br>(7,731,399,825-12,065,780,218)            | 8,673,151.380<br>(6,924,543,057-10,453,113,542)            | 12,656,782.317<br>(9,483,824,686-15,807,169,630)           | 10,014,898.800<br>(8,388,766,309-11,770,873,864)           | 10,290,385.527<br>(8,547,052,049-12,130,800,512)           | 10,813,333.739<br>(8,828,495,421-13,174,126,648)           |
| Oman         | All causes | 57,962,512.052<br>(50,095,469,708-66,157,408,926)          | 52,652,812.967<br>(45,363,811,402-60,575,736,612)          | 44,882,038.304<br>(38,345,381,117-51,703,692,893)          | 44,882,038.304<br>(40,382,239,374-54,097,755,438)          | 46,907,703.065<br>(49,847,989,546-66,239,253,958)          | 57,621,239.514<br>(70,159,331,608-97,719,155,898)          |
| Oman         | Group I    | 19,580,037.153<br>(16,278,223,506-23,209,200,605)          | 13,031,194.763<br>(11,174,956,901-15,204,464,485)          | 8,416,609.635<br>(7,262,593,447-9,785,205,057)             | 7,089,163.021<br>(6,107,733,806-8,277,915,010)             | 8,233,732.282<br>(7,193,219,306-9,475,297,904)             | 9,884,844.418<br>(8,370,465,340-11,664,614,513)            |
| Oman         | NCD        | 28,016,455.015<br>(23,280,388,243-33,167,734,130)          | 29,917,346.230<br>(24,929,484,572-35,632,848,717)          | 28,701,732.526<br>(23,816,703,896-34,099,856,453)          | 32,110,450.584<br>(26,817,372,269-37,952,886,255)          | 39,898,706.828<br>(33,318,215,097-47,057,395,026)          | 59,937,527.908<br>(48,667,815,499-71,666,479,995)          |
| Oman         | Injuries   | 10,366,019.883<br>(7,706,800,974-12,945,346,481)           | 9,704,271.973<br>(7,762,836,370-11,649,369,803)            | 7,763,696.143<br>(6,743,579,174-9,088,081,652)             | 7,708,089.460<br>(6,984,772,798-8,499,668,978)             | 13,980,426.016<br>(8,688,077,404-10,311,217,290)           | 13,980,426.016<br>(11,796,046,303-16,741,659,920)          |
| Qatar        | All causes | 10,248,859.558<br>(8,956,738,482-11,646,158,792)           | 10,836,240.878<br>(9,365,054,992-12,493,158,598)           | 12,602,347.642<br>(10,879,433,567-14,356,403,568)          | 16,025,601.275<br>(13,625,872,138-18,605,759,464)          | 28,791,187.517<br>(24,082,094,282-34,119,257,886)          | 34,646,818.861<br>(28,597,290,723-41,696,382,381)          |
| Qatar        | Group I    | 1,677,130.358<br>(1,308,510,955-2,185,539,953)             | 1,544,999.999<br>(1,232,659,702-1,923,270,399)             | 1,513,027.858<br>(1,209,260,348-1,880,426,371)             | 1,661,461.653<br>(1,334,597,311-2,010,809,172)             | 2,475,624.323<br>(2,009,771,926-3,050,501,566)             | 2,845,536.448<br>(2,252,595,158-3,596,943,158)             |
| Qatar        | NCD        | 6,165,891.264<br>(5,182,182,551-7,191,234,177)             | 6,820,504.076<br>(5,730,651,734-7,997,010,443)             | 8,318,933.762<br>(7,072,995,694-9,713,575,342)             | 10,888,038.973<br>(9,008,407,374-12,887,307,620)           | 19,551,441.806<br>(16,148,159,558-24,337,417,965)          | 24,669,433.529<br>(19,812,399,874-30,295,411,155)          |
| Qatar        | Injuries   | 2,405,837.936<br>(2,092,800,883-2,729,705,515)             | 2,470,736.803<br>(2,171,575,166-2,810,126,427)             | 2,770,386.027<br>(2,411,584,569-3,143,720,213)             | 3,475,560.649<br>(3,056,389,535-3,928,617,618)             | 6,364,121.387<br>(5,522,156,586-7,251,207,621)             | 7,131,848.873<br>(5,782,190,955-8,649,171,087)             |
| Saudi Arabia | All causes | 485,907,372.853<br>(435,986,356,992-543,896,405,891)       | 478,814,831.826<br>(409,087,650,256-507,218,373,729)       | 436,980,683.144<br>(386,721,436,944-598,051,558)           | 455,888,359.075<br>(397,943,425,635-522,041,564,427)       | 488,641,616.264<br>(423,024,886,286-562,542,202,180)       | 536,147,643.684<br>(456,788,907,718-623,637,615,656)       |
| Saudi Arabia | Group I    | 178,063,915.825<br>(148,748,718,557-200,187,545,089)       | 139,812,154.301<br>(120,081,812,919-156,337,012,380)       | 100,686,246.277<br>(88,900,601,985-112,932,974,358)        | 82,993,004.222<br>(72,137,827,495-93,737,339,665)          | 74,287,853.023<br>(63,878,844,960-84,867,608,280)          | 67,720,551.640<br>(57,617,399,591-78,160,343,880)          |
| Saudi Arabia | NCD        | 221,936,573.055<br>(186,643,676,297-263,002,140,870)       | 243,629,946.209<br>(204,937,715,327-282,516,308,386)       | 264,546,594.876<br>(221,970,712,516-308,484,568,197)       | 298,879,905.265<br>(249,192,600,250-350,981,509,533)       | 339,229,143.829<br>(281,826,946,893-400,099,225,522)       | 391,954,572.793<br>(323,309,480,219-465,300,950,650)       |
| Saudi Arabia | Injuries   | 85,906,883.973<br>(67,530,426,027-133,158,323,702)         | 74,372,731.316<br>(66,460,560,423-81,600,819,446)          | 71,747,841.991<br>(65,438,091,819-77,616,809,853)          | 74,015,449.588<br>(67,738,420,192-79,658,548,812)          | 75,124,619.412<br>(68,423,871,887-81,191,786,093)          | 76,472,519.252<br>(68,176,680,892-84,843,954,867)          |
| Sudan        | All causes | 1,522,243,278.215<br>(1,422,786,852,190-1,633,417,496,268) | 1,662,482,095.388<br>(1,532,367,969,702-1,800,980,483,741) | 1,678,140,772.315<br>(1,536,674,658,858-1,839,673,586,216) | 1,619,712,227.110<br>(1,449,276,468,967-1,791,390,606,753) | 1,606,623,224.646<br>(1,406,589,399,150-1,808,704,432,427) | 1,582,025,649.282<br>(1,344,772,766,893-1,843,632,748,325) |
| Sudan        | Group I    | 889,758,857.032<br>(752,041,269,725-1,008,406,738,533)     | 938,027,034.554<br>(795,307,125,689-1,075,070,822,333)     | 906,199,989.059<br>(768,464,283,763-1,034,689,423,275)     | 797,130,771.970<br>(676,458,285,549-909,197,845,697)       | 708,934,036.817<br>(599,540,401,419,838,086,440,614)       | 625,982,689.428<br>(502,474,944,941-780,815,753,845)       |
| Sudan        | NCD        | 454,462,839.239<br>(371,704,983,776-579,604,345,355)       | 540,969,552.965<br>(437,356,736,206-680,762,966,792)       | 571,575,650.169<br>(462,410,750,225-703,640,849,668)       | 623,264,820.070<br>(505,428,074,524-756,361,487,619)       | 686,137,936.886<br>(554,373,903,221-827,834,317,775)       | 746,616,929.376<br>(613,928,132,469-900,708,038,658)       |
| Sudan        | Injuries   | 178,021,581.940<br>(117,988,985,478-233,965,213,983)       | 183,485,507.469<br>(116,972,326,773-244,320,601,886)       | 166,465,112.146<br>(137,466,152,538-261,568,268,928)       | 199,316,635.070<br>(142,657,524,443-255,293,853,609)       | 211,551,250.962<br>(158,206,461,141-270,673,162,279)       | 209,426,030.478<br>(161,218,515,259-266,477,984,407)       |
| Syria        | All causes | 385,587,676.356<br>(349,977,223,551-423,592,073,492)       | 361,967,047.500<br>(322,001,331,732-401,498,583,877)       | 355,299,777.964<br>(312,389,821,961-394,114,828,096)       | 355,299,777.964<br>(312,389,821,961-394,114,828,096)       | 387,611,264.329<br>(315,252,414,540-401,521,554,353)       | 709,874,191.439<br>(490,951,032,483-919,110,927,341)       |
| Syria        | Group I    | 154,667,720.430<br>(136,587,361,495-181,592,856,256)       | 119,902,366.844<br>(105,967,346,857-138,599,636,581)       | 88,898,234.911<br>(79,088,114,430-100,414,527,885)         | 78,635,627.362<br>(68,744,439,436-92,238,613,891)          | 73,768,988.785<br>(65,267,929,192-83,736,110,164)          | 60,766,060.654<br>(52,221,638,321-70,533,079,253)          |
| Syria        | NCD        | 199,045,549.900<br>(170,074,548,745-227,698,586,203)       | 210,718,272.550<br>(179,453,701,472-242,766,008,981)       | 230,812,646.277<br>(199,284,756,151-264,858,338,102)       | 246,155,111.886<br>(212,763,234,674-283,777,423,743)       | 280,334,127.624<br>(242,245,812,577-324,000,782,900)       | 260,299,403.915<br>(222,765,561,112-305,950,950,840)       |
| Syria        | Injuries   | 31,874,406.025<br>(25,940,254,444-37,273,979,262)          | 31,346,408.106<br>(26,225,140,719-36,520,949,907)          | 32,334,018.151<br>(28,448,851,123-36,727,988,464)          | 30,509,038.716<br>(26,916,560,321-33,898,293,836)          | 33,058,147.921<br>(30,519,263,661-36,604,276,248)          | 388,808,726.870<br>(176,422,057,991-502,952,974,030)       |
| Tunisia      | All causes | 256,356,676.069<br>(234,636,681,552-280,845,707,001)       | 245,593,868.637<br>(220,530,049,459-272,402,072,187)       | 236,657,718.223<br>(209,164,518,080-267,999,257,534)       | 227,713,488.114<br>(206,658,285,225-273,438,487,771)       | 248,963,350.544<br>(213,457,214,283                        |                                                            |

Appendix Table 3. DALYs for all causes and level 1 cause groups by location for 1990 - 2015, both sexes combined.

|                      | Cause      | 1990                                                          | 1995                                                          | 2000                                                          | 2005                                                          | 2010                                                          | 2015                                                          |
|----------------------|------------|---------------------------------------------------------------|---------------------------------------------------------------|---------------------------------------------------------------|---------------------------------------------------------------|---------------------------------------------------------------|---------------------------------------------------------------|
| United Arab Emirates | All causes | 47,256,241.792<br>(39,084,348.152-55,813,879.426)             | 54,808,273.177<br>(46,663,950.532-63,225,812.925)             | 63,563,514.109<br>(54,291,550,820-73,575,106,451)             | 87,540,031.619<br>(74,555,310,924-101,334,552,404)            | 159,987,947.208<br>(133,027,284.176-189,907,699.566)          | 191,053,307.498<br>(155,529,487.985-231,174,544,206)          |
|                      | Group I    | 9,692,938.036<br>(6,765,657.687-13,819,794.768)               | 8,253,719.715<br>(5,927,680.902-11,779,239.004)               | 7,575,018.355<br>(5,691,614,582-10,726,040,385)               | 8,650,102.910<br>(6,855,343,208-12,373,430,705)               | 13,667,036.234<br>(9,837,148,524-19,651,236,007)              | 13,887,250.806<br>(10,574,810,634-19,685,981,889)             |
| United Arab Emirates | NCD        | 27,302,257.368<br>(22,532,931.521-32,570,178.105)             | 34,517,409.554<br>(28,729,858.718-40,454,920.204)             | 42,232,497.263<br>(35,077,410,220-49,620,320,900)             | 60,374,359.966<br>(48,155,568,744)                            | 114,658,499.191<br>(94,013,795,685-137,408,660,536)           | 143,119,939.448<br>(116,229,669,906-173,196,246,539)          |
|                      | Injuries   | 10,261,046.387<br>(8,023,041,240-12,604,458,765)              | 12,037,143.908<br>(9,914,772,136-14,132,233,867)              | 13,755,998.490<br>(11,675,740,723-15,961,808,922)             | 18,515,568.744<br>(15,603,377,974-21,067,879,499)             | 34,046,411.783<br>(25,878,625,940-39,317,436,480)             | 34,046,411.783<br>(25,467,415,111-42,782,049,197)             |
| Yemen                | All causes | 988,599,862.533<br>(906,482,077.064-1,075,772,534.102)        | 1,024,953,986.688<br>(922,395,509,058-1,145,314,071.603)      | 951,113,315.504<br>(835,110,348,104-1,095,787,944.915)        | 902,714,368.502<br>(771,325,607,767-1,058,364,898,281)        | 879,552,393.732<br>(733,204,119,232-1,084,102,480,048)        | 1,048,950,926.572<br>(884,637,773,149-1,287,627,257,829)      |
|                      | Group I    | 612,632,500.554<br>(501,432,169,812-715,592,038,234)          | 578,821,759.452<br>(474,186,502,376-683,169,592,413)          | 493,855,885.234<br>(405,528,538,482-587,188,242,430)          | 411,491,832.613<br>(341,272,432,986-489,639,880,252)          | 339,742,249.387<br>(287,627,266,848-390,398,360,406)          | 307,432,108.887<br>(246,546,320,700-363,535,210,877)          |
| Yemen                | NCD        | 278,040,189.485<br>(195,843,387,485-392,087,374,427)          | 339,238,317.325<br>(243,017,210,609-450,145,057,123)          | 353,170,127.194<br>(259,992,426,455-472,712,389,999)          | 379,358,056.878<br>(281,821,004,040-501,047,726,893)          | 423,344,159.014<br>(326,370,249,351-555,563,693,509)          | 481,900,008.012<br>(369,305,485,511-637,705,075,219)          |
|                      | Injuries   | 97,927,172.495<br>(53,926,201,570-141,187,497,762)            | 106,893,909.911<br>(60,079,746,053-150,467,205,414)           | 104,087,303.075<br>(60,485,362,996-150,123,068,749)           | 111,864,499.011<br>(72,418,522,944-155,118,852,097)           | 116,465,985.332<br>(83,294,368,343-164,127,867,657)           | 259,558,809.633<br>(201,864,280,504-311,118,628,537)          |
| South Asia           | All causes | 73,684,039,924.211<br>(70,251,198,572,328-77,529,688,018,805) | 71,227,286,223.000<br>(68,004,455,532,691-75,965,834,157,628) | 70,232,523,666.658<br>(66,026,935,965,935-74,957,164,217,013) | 68,684,127,236.730<br>(64,342,009,247,399-73,600,199,232,995) | 66,042,91,054.054<br>(61,340,688,172,545-71,194,734,440,970)  | 64,649,008,840.370<br>(59,556,220,977,450-70,120,999,872,764) |
|                      | Group I    | 45,427,175,249.697<br>(43,982,352,942,682-46,997,757,208,295) | 40,774,672,897.781<br>(39,360,627,876,899-42,344,963,626,228) | 36,706,968,100.963<br>(35,272,629,091,389-38,298,854,136,928) | 33,026,950,670.889<br>(31,654,838,480,621-34,615,474,897,169) | 28,361,652,342.093<br>(26,954,213,842,083-29,957,358,627,443) | 24,312,716,829.477<br>(22,910,523,904,761-25,856,690,122,040) |
| South Asia           | NCD        | 22,061,412,115.477<br>(19,780,976,622,437-24,390,765,590,108) | 24,405,669,118.050<br>(21,869,013,563,256-27,021,510,881,730) | 26,936,992,396.221<br>(24,089,114,864,408-29,844,791,683,753) | 28,717,048,463.252<br>(25,589,623,601,445-31,970,281,635,925) | 31,329,842,121.705<br>(27,999,169,579,660-34,896,128,205,711) | 33,975,121,453.699<br>(30,281,436,927,533-37,879,304,813,905) |
|                      | Injuries   | 6,195,452,559.036<br>(5,222,932,735,722-6,796,977,319,905)    | 6,546,944,207.170<br>(5,384,897,595,207-7,130,547,682,656)    | 6,588,563,169.754<br>(5,463,071,482,509-7,130,570,257,545)    | 6,940,128,102.589<br>(5,430,434,734,197-7,501,667,510,510)    | 6,350,996,590.256<br>(5,343,445,877,118-6,856,073,865,975)    | 6,361,170,557.223<br>(5,399,730,968,075-6,963,278,380,136)    |
| Bangladesh           | All causes | 7,683,884,738.500<br>(7,303,423,391,195-8,084,463,780,752)    | 6,753,940,005.500<br>(6,367,967,959,686-7,174,592,201,849)    | 6,032,779,645.544<br>(5,617,715,860,658-6,507,377,768,392)    | 5,556,677,789.508<br>(5,129,104,191,826-6,047,725,770,799)    | 5,166,880,818.818<br>(4,707,196,250,660-5,689,082,560,299)    | 5,023,799,910.305<br>(4,487,887,705,234-5,644,097,462,022)    |
|                      | Group I    | 4,930,004,884.361<br>(4,696,075,147,404-5,173,760,170,060)    | 3,879,976,664.156<br>(3,666,802,469,084-4,083,173,436,600)    | 2,982,712,188.683<br>(2,799,361,915,206-3,152,105,417,274)    | 2,322,451,939.724<br>(2,176,861,847,025-2,478,478,694,906)    | 1,778,198,594.626<br>(1,653,211,065,202-1,913,637,895,030)    | 1,444,117,933.332<br>(1,315,686,685,396-1,580,400,101,753)    |
| Bangladesh           | NCD        | 1,983,058,711.485<br>(1,717,403,290,465-2,305,693,524,990)    | 2,133,328,479.194<br>(1,838,799,442,079-2,456,088,533,317)    | 2,348,798,194.123<br>(2,044,759,873,822-2,684,259,436,434)    | 2,605,877,770.828<br>(2,268,199,660,972-2,956,647,728,863)    | 2,831,646,608.196<br>(2,468,648,395,233-3,203,062,620,282)    | 3,044,645,462.015<br>(2,617,228,118,303-3,511,044,383,587)    |
|                      | Injuries   | 770,821,142.654<br>(660,008,340,043-921,239,019,845)          | 746,634,862.150<br>(530,576,021,775-883,634,390,838)          | 701,269,262.739<br>(495,806,614,340-830,504,070,959)          | 708,348,078.957<br>(467,801,423,064-722,563,833,210)          | 557,035,615.996<br>(435,290,661,143-630,808,236,371)          | 535,036,514.958<br>(420,496,688,103-620,332,195,306)          |
| Bhutan               | All causes | 34,690,929.818<br>(32,165,857,275-37,284,997,974)             | 27,674,848.130<br>(25,625,705,704-29,849,160,551)             | 25,566,943.834<br>(23,424,363,769-27,961,436,229)             | 23,305,359.121<br>(21,018,027,685-25,696,497,428)             | 22,558,726.185<br>(19,976,832,821-25,334,068,621)             | 22,439,730.430<br>(19,582,671,822-25,581,788,707)             |
|                      | Group I    | 22,782,786.826<br>(20,816,303,283-24,829,260,718)             | 16,955,408.169<br>(15,523,964,961-18,546,396,062)             | 13,228,325.386<br>(11,310,454.144)                            | 11,310,454.144<br>(10,255,857,110-12,533,056,905)             | 9,530,148.249<br>(8,495,048,101-10,660,358,934)               | 8,075,963.089<br>(7,085,520,019-9,129,026,386)                |
| Bhutan               | NCD        | 9,569,777.031<br>(8,108,815,932-11,145,156,422)               | 8,730,290.544<br>(7,459,843,121-10,144,712,217)               | 9,149,185.549<br>(7,864,077,957-10,532,292,063)               | 10,183,142.534<br>(8,666,595,300-11,776,462,838)              | 11,268,150.211<br>(9,477,492,813-13,156,596,278)              | 12,631,875.747<br>(10,549,789,197-14,816,911,373)             |
|                      | Injuries   | 2,338,365.961<br>(1,664,262,775-3,043,681,871)                | 1,989,149.418<br>(1,491,148,912-2,519,319,145)                | 3,189,432.898<br>(2,542,166,230-3,902,623,100)                | 1,811,762.443<br>(1,522,587,492-2,096,042,049)                | 1,760,427.724<br>(1,481,581,154-2,061,330,504)                | 1,731,891.594<br>(1,432,515,361-2,068,184,182)                |
| India                | All causes | 57,617,147,581.363<br>(54,838,957,756,606-60,780,900,910,963) | 56,433,435,996.233<br>(53,382,850,543,896-59,984,652,956,055) | 55,676,683,032.429<br>(52,388,197,967,661-59,463,122,214,825) | 54,026,546,254.793<br>(50,557,736,176,279-58,045,354,808,681) | 52,003,910,033.314<br>(48,257,641,111,668-56,161,650,967,772) | 50,788,804,037.895<br>(46,527,548,000,534-54,952,406,648,531) |
|                      | Group I    | 34,809,123,387.749<br>(33,644,671,970,976-36,109,657,763,821) | 31,533,059,406.314<br>(30,403,831,796,718-32,884,568,616,706) | 28,817,819,982.489<br>(27,583,647,184,832-30,174,827,299,833) | 26,102,900,721.657<br>(24,904,953,266,332-27,532,002,643,823) | 22,215,241,667.957<br>(21,049,082,830,226-23,532,802,643,823) | 18,824,367,727.468<br>(17,593,447,140,566-20,108,427,876,334) |
| India                | NCD        | 17,858,941,056.088<br>(15,987,929,427,111-19,733,927,061,012) | 19,608,136,636.345<br>(17,509,932,511,510-21,725,504,114,055) | 21,557,616,263.227<br>(19,267,492,935,611-23,890,207,911,927) | 22,734,176,620.714<br>(20,311,213,138-25,302,645,497,697)     | 24,742,860,426.647<br>(22,167,393,123,168-27,593,718,187,061) | 26,744,628,757.387<br>(23,769,503,354,126-29,864,862,695,721) |
|                      | Injuries   | 4,949,083,137.526<br>(4,256,749,933,505-5,435,251,500,584)    | 5,272,239,953.764<br>(4,382,149,175,136-5,752,890,424,595)    | 5,306,344,786.714<br>(4,446,040,341,021-5,590,189,351,579)    | 5,189,468,912.422<br>(4,388,419,549,158-5,950,370,519,195)    | 5,045,807,938.710<br>(4,249,942,011,914-5,458,317,792,680)    | 5,009,812,503.139<br>(4,235,425,102,195-5,508,798,428,235)    |
| Nepal                | All causes | 1,393,162,006.831<br>(1,320,247,242,030-1,475,167,731,716)    | 1,273,782,884.553<br>(1,204,510,005,562-1,353,491,657,288)    | 1,115,905,147.166<br>(1,044,295,509,109-1,193,791,045,462)    | 1,004,809,033.274<br>(926,553,041,716-1,088,482,396,015)      | 903,790,327.374<br>(811,369,471,573-1,000,120,273,875)        | 929,609,265.621<br>(814,979,286,812-1,048,284,553,339)        |
|                      | Group I    | 996,531,764.949<br>(952,863,281,423-1,040,236,639,568)        | 849,547,253.163<br>(813,738,554,707-886,290,746,515)          | 678,755,198.472<br>(647,006,694,811-710,087,221,699)          | 537,936,577.052<br>(504,209,044,881-573,615,184,659)          | 413,536,540.039<br>(377,509,613,318-451,061,334,162)          | 329,070,657.115<br>(293,001,327,766-366,496,282,812)          |
| Nepal                | NCD        | 319,815,424.952<br>(275,763,493,338-369,903,258,383)          | 344,754,984.793<br>(298,760,727,335-397,267,345,209)          | 360,584,155.616<br>(313,177,208,475-414,280,513,374)          | 386,433,958.529<br>(329,891,327,401-446,489,618,206)          | 420,766,606.391<br>(353,528,771,161-489,846,346,409)          | 469,373,926.034<br>(390,277,367,637-551,205,093,093)          |
|                      | Injuries   | 76,814,716.930<br>(62,287,372,056-92,023,019,613)             | 79,480,646.596<br>(64,739,462,992-94,250,661,420)             | 76,566,057.549<br>(63,618,541,791-89,315,720,241)             | 80,438,497.693<br>(67,827,269,982-94,592,487,538)             | 69,487,270.943<br>(56,817,543,552-84,820,616,219)             | 131,244,682.483<br>(101,536,326,021-161,838,130,246)          |
| Pakistan             | All causes | 6,955,154,667.699<br>(6,588,986,864,224-7,335,376,201,168)    | 7,238,452,488.294<br>(6,821,186,328,412-7,731,007,897,321)    | 7,381,588,703.674<br>(6,900,334,877,430-7,902,396,932,163)    | 8,072,788,800.034<br>(7,521,662,411,764-8,682,675,901,947)    | 7,945,251,148.363<br>(7,266,619,623,803-8,681,403,908,065)    | 8,094,275,896.118<br>(7,345,110,189,198-8,920,765,234,082)    |
|                      | Group I    | 4,668,732,425.813<br>(4,480,301,400,478-4,868,000,998,254)    | 4,481,134,165.900<br>(4,283,695,575,006-4,682,476,031,673)    | 4,219,552,405.933<br>(4,046,752,585,553-4,406,922,231,267)    | 4,052,350,978.312<br>(3,854,108,247,372-4,259,646,168,393)    | 3,945,145,481.220<br>(3,704,312,701,508-4,192,615,560,096)    | 3,707,609,498.573<br>(3,424,579,795,123-4,024,073,129,088)    |
| Pakistan             | NCD        | 1,890,027,045.922<br>(1,651,821,265,532-2,128,069,759,211)    | 2,660,842,668.166<br>(2,029,667,462,283-2,627,666,863,342)    | 2,660,842,668.166<br>(2,330,240,446,429-2,987,713,824,309)    | 2,987,376,970.648<br>(2,602,761,982,421-3,340,557,802,869)    | 3,323,300,320.266<br>(2,873,805,202,000-3,787,054,184,810)    | 3,703,841,432.496<br>(3,213,287,533,576-4,269,137,541,182)    |
|                      | Injuries   | 396,395,195.964<br>(322,395,958,391-488,742,033,379)          | 446,599,595.241<br>(370,664,436,184-526,530,381,258)          | 501,193,629.575<br>(420,388,930,745-584,608,657,154)          | 1,040,060,851.074<br>(812,162,220,185-1,273,453,322,725)      | 676,905,336.883<br>(582,911,443,497-777,527,838,604)          | 683,344,965.048<br>(585,628,682,157-798,835,574,290)          |
| Sub-Saharan Africa   | All causes | 48,380,267,990.927<br>(46,651,216,383,962-50,295,706,659,859) | 57,624,697,970.130<br>(50,793,363,722,760-54,951,494,446,663) | 58,195,991,678.457<br>(55,458,794,716,860-60,030,022,931,031) | 58,195,991,678.457<br>(55,867,689,634,717-60,870,646,126,119) | 55,663,233,899.627<br>(52,818,714,396,663-58,953,261,243,531) | 52,929,561,173.093<br>(49,696,169,702,407-56,483,238,499,816) |
|                      | Group I    | 42,580,385,274.228<br>(34,388,653,556,368-37,338,196,701,424) | 39,422,156,127.179<br>(37,925,818,983,344-40,961,636,651,634) | 38,623,999,041                                                |                                                               |                                                               |                                                               |

Appendix Table 3. DALYs for all causes and level 1 cause groups by location for 1990 - 2015, both sexes combined.

|                            | Cause      | 1990                                                          | 1995                                                          | 2000                                                          | 2005                                                          | 2010                                                          | 2015                                                          |
|----------------------------|------------|---------------------------------------------------------------|---------------------------------------------------------------|---------------------------------------------------------------|---------------------------------------------------------------|---------------------------------------------------------------|---------------------------------------------------------------|
| Botswana                   | Injuries   | 5,540,452,271<br>(2,974,808,195-11,018,438,294)               | 7,041,560,615<br>(3,351,812,008-17,199,848,964)               | 10,265,807,557<br>(3,924,374,878-30,037,520,092)              | 11,880,069,138<br>(4,240,982,540-33,822,156,250)              | 11,326,178,820<br>(4,486,571,298-35,187,154,180)              | 11,458,070,437<br>(4,783,415,387-36,667,549,935)              |
| Lesotho                    | All causes | 92,611,220,451<br>(84,361,837,576-101,825,542,742)            | 106,506,476,164<br>(96,532,554,131-116,544,988,250)           | 150,035,560,254<br>(133,270,987,226-169,852,999,313)          | 204,840,779,205<br>(180,611,263,302-231,731,922,179)          | 204,840,779,205<br>(162,438,114,719-217,561,496,811)          | 194,868,788,529<br>(156,994,882,209-241,646,567,062)          |
| Lesotho                    | Group I    | 58,679,115,169<br>(54,558,138,661-64,175,057,877)             | 69,048,503,876<br>(63,912,842,423-75,005,910,055)             | 106,555,243,489<br>(94,600,402,526-122,747,406,990)           | 147,262,692,461<br>(129,701,127,721-168,551,407,821)          | 128,193,900,640<br>(113,612,092,554-145,710,052,416)          | 129,871,084,813<br>(108,444,436,867-154,284,451,444)          |
| Lesotho                    | NCD        | 25,685,085,183<br>(20,193,956,000-30,629,969,911)             | 27,948,496,589<br>(22,145,154,347-33,247,057,193)             | 32,267,588,471<br>(26,228,180,549-39,607,186,123)             | 42,444,780,836<br>(35,240,550,516-51,487,355,407)             | 43,762,212,109<br>(33,534,814,341-56,630,366,877)             | 46,954,308,250<br>(32,674,647,156-65,851,906,580)             |
| Lesotho                    | Injuries   | 8,247,020,098<br>(6,547,195,762-10,269,847,172)               | 9,509,475,699<br>(7,198,334,877-11,729,770,831)               | 11,212,728,294<br>(8,501,231,688-14,452,399,988)              | 15,133,305,968<br>(11,384,335,582-19,223,622,338)             | 16,998,782,245<br>(10,835,218,683-23,920,845,206)             | 18,043,395,466<br>(9,564,122,499-29,843,156,483)              |
| Namibia                    | All causes | 72,789,135,753<br>(67,414,238,183-78,516,112,339)             | 83,636,535,406<br>(76,424,687,164-91,729,395,467)             | 123,816,134,119<br>(110,758,260,263-139,925,653,449)          | 139,685,195,084<br>(123,839,026,968-158,655,821,203)          | 110,017,153,478<br>(96,000,514,453-127,211,942,404)           | 107,165,065,835<br>(88,835,887,229-129,101,908,458)           |
| Namibia                    | Group I    | 44,466,372,061<br>(41,460,594,733-47,802,279,355)             | 49,911,293,455<br>(45,748,837,963-54,667,746,432)             | 78,458,772,673<br>(68,905,041,548-90,604,672,864)             | 96,198,259,670<br>(84,413,744,837-111,605,812,949)            | 70,316,017,145<br>(61,720,875,244-82,606,793,386)             | 64,402,777,662<br>(54,382,243,667-75,858,451,258)             |
| Namibia                    | NCD        | 21,148,189,363<br>(17,979,528,647-24,311,433,321)             | 25,540,602,598<br>(21,744,492,250-29,288,212,649)             | 33,754,503,276<br>(27,922,862,025-40,147,950,262)             | 37,509,245,077<br>(26,593,244,525-49,439,855,460)             | 30,430,390,972<br>(23,864,908,902-37,408,406,637)             | 33,386,549,722<br>(25,555,312,476-43,283,144,436)             |
| Namibia                    | Injuries   | 7,174,574,329<br>(5,969,129,727-8,366,836,819)                | 8,184,639,354<br>(6,749,126,558-9,744,181,360)                | 11,602,858,169<br>(9,243,547,783-14,423,027,328)              | 10,551,690,341<br>(8,148,464,744-13,859,107,457)              | 9,270,736,362<br>(6,571,797,118-12,000,304,242)               | 9,375,738,450<br>(5,932,255,493-14,254,700,803)               |
| South Africa               | All causes | 1,876,379,600,455<br>(1,761,083,666,867-2,007,086,723,220)    | 1,986,174,240,231<br>(1,862,681,989,022-2,128,702,903,290)    | 2,825,808,299,896<br>(2,639,362,154,212-3,025,867,162,546)    | 3,680,054,268,796<br>(3,422,268,155,211-3,949,515,487,438)    | 3,585,149,143,609<br>(3,334,927,163,239-3,857,610,908,656)    | 2,827,086,178,664<br>(2,628,249,992,648-3,040,959,452,968)    |
| South Africa               | Group I    | 838,106,863,955<br>(792,754,357,913-895,250,022,897)          | 865,920,311,248<br>(815,227,199,387-935,404,507,751)          | 1,472,379,925,702<br>(1,364,787,537,650-1,599,052,888,797)    | 2,318,450,653,445<br>(2,143,548,599,199-2,528,015,187,408)    | 2,305,314,089,886<br>(2,136,048,422,023-2,508,993,988,201)    | 1,447,643,715,415<br>(1,354,395,906,236-1,555,954,901,997)    |
| South Africa               | NCD        | 704,861,508,090<br>(623,589,643,320-786,587,277,356)          | 785,127,664,592<br>(696,632,617,073-880,956,694,417)          | 970,107,677,778<br>(859,105,625,699-1,095,335,160,217)        | 1,008,455,266,365<br>(871,832,963,944-1,159,316,738,314)      | 978,180,734,211<br>(840,836,653,527-1,126,083,560,446)        | 1,066,144,826,676<br>(934,946,339,625-1,204,258,667,400)      |
| South Africa               | Injuries   | 333,411,228,410<br>(298,402,531,486-359,658,086,883)          | 335,126,264,391<br>(298,119,517,062-360,422,554,755)          | 383,320,696,416<br>(341,398,087,720-419,033,305,468)          | 353,148,348,977<br>(306,234,682,877-403,563,291,487)          | 301,654,318,972<br>(260,952,944,375-347,398,305,372)          | 313,297,636,574<br>(278,597,407,702-350,695,402,090)          |
| Swaziland                  | All causes | 46,562,907,221<br>(41,656,225,359-51,910,382,595)             | 54,236,056,984<br>(48,161,452,977-60,667,299,677)             | 86,961,226,784<br>(76,212,017,240-99,897,590,877)             | 118,585,098,539<br>(103,822,916,490-133,385,538,379)          | 110,207,990,161<br>(92,859,825,371-129,493,778,800)           | 93,755,018,660<br>(73,543,379,441-116,851,759,448)            |
| Swaziland                  | Group I    | 28,181,234,190<br>(25,887,169,787-30,891,983,529)             | 35,647,699,238<br>(32,134,477,287-40,251,683,784)             | 61,481,638,686<br>(53,201,550,659-72,700,982,658)             | 85,016,290,965<br>(74,680,561,651-100,075,484,946)            | 75,482,693,754<br>(66,085,837,178-88,609,650,093)             | 58,588,273,313<br>(49,552,725,914-69,632,798,400)             |
| Swaziland                  | NCD        | 13,335,518,754<br>(10,797,106,925-16,030,005,678)             | 13,791,699,510<br>(10,601,791,179-17,069,427,912)             | 18,718,677,021<br>(14,493,425,159-23,908,458,731)             | 23,955,551,988<br>(18,566,936,855-30,970,123,571)             | 25,290,764,743<br>(17,856,933,114-34,710,880,443)             | 26,013,060,752<br>(16,907,953,905-37,798,327,655)             |
| Swaziland                  | Injuries   | 5,046,154,728<br>(3,863,137,203-6,475,014,341)                | 4,796,658,236<br>(3,318,290,855-6,200,204,748)                | 6,760,910,477<br>(4,769,343,784-9,140,263,333)                | 8,713,255,567<br>(6,050,711,991-12,201,495,196)               | 9,134,531,664<br>(5,312,752,383-14,283,122,749)               | 9,153,684,595<br>(4,504,872,760-15,923,725,809)               |
| Zimbabwe                   | All causes | 499,058,779,155<br>(458,905,059,771-545,360,928,756)          | 720,688,605,056<br>(632,260,812,602-836,529,962,461)          | 1,035,391,553,342<br>(890,278,730,079-1,201,364,607,141)      | 1,214,159,314,963<br>(1,074,523,931,662-1,365,214,672,151)    | 1,139,391,457,940<br>(1,030,338,774,716-1,253,113,837,025)    | 839,988,391,411<br>(720,270,075,385-963,723,389,857)          |
| Zimbabwe                   | Group I    | 319,728,174,919<br>(295,066,013,705-355,741,214,560)          | 528,263,430,183<br>(455,472,524,783-630,221,984,496)          | 798,241,771,867<br>(678,317,925,794-950,809,440,228)          | 950,668,782,912<br>(831,405,555,404-1,085,771,324,938)        | 857,691,920,158<br>(776,154,646,018-946,409,040,392)          | 563,194,904,022<br>(495,384,082,610-642,250,696,697)          |
| Zimbabwe                   | NCD        | 144,577,066,611<br>(122,143,430,032-168,753,926,567)          | 155,981,376,554<br>(120,652,267,980-198,640,449,966)          | 191,526,463,804<br>(150,155,388,044-247,457,108,407)          | 213,434,546,143<br>(168,987,957,065-265,416,067,265)          | 223,761,089,286<br>(183,727,794,089-273,844,083,023)          | 226,860,739,887<br>(170,547,018,051-285,855,903,930)          |
| Zimbabwe                   | Injuries   | 34,753,537,626<br>(27,352,442,663-44,637,304,158)             | 36,443,798,318<br>(24,847,905,309-54,755,866,191)             | 45,623,317,671<br>(30,225,446,201-70,337,205,663)             | 50,055,985,907<br>(33,834,816,404-71,018,900,681)             | 54,892,797,445<br>(39,945,874,048-73,778,333,356)             | 53,023,398,103<br>(33,860,381,000-76,054,360,906)             |
| Western Sub-Saharan Africa | All causes | 20,627,571,614,096<br>(19,764,882,759,199-21,598,701,693,929) | 22,377,814,392,290<br>(21,535,773,409,842-23,234,469,413,898) | 24,110,729,930,113<br>(23,237,311,110,687-25,149,566,975,761) | 24,753,014,868,018<br>(23,711,370,726,047-25,918,269,639,834) | 23,851,492,265,111<br>(22,691,251,834,277-25,203,959,031,209) | 22,955,239,091,202<br>(21,426,978,733,742-24,747,555,479,809) |
| Western Sub-Saharan Africa | Group I    | 15,903,554,571,608<br>(15,102,861,784,810-16,601,196,514,194) | 17,123,675,148,665<br>(16,337,819,911,303-17,844,218,631,278) | 18,298,088,562,459<br>(17,463,536,557,067-19,061,558,826,005) | 19,174,176,829,918<br>(18,129,479,181,481,730,993,490)        | 17,268,794,551,875<br>(16,422,493,891,876-18,085,889,294,978) | 15,539,418,351,394<br>(14,569,499,405,329-16,391,138,088,088) |
| Western Sub-Saharan Africa | NCD        | 3,676,314,985,011<br>(3,089,531,210,839-4,368,341,136,108)    | 4,097,879,828,064<br>(3,525,285,996,917-4,814,009,095,274)    | 4,583,882,397,181<br>(3,946,419,931,042-5,326,590,582,963)    | 4,863,819,659,911<br>(4,182,814,675,073-5,665,479,541,132)    | 5,346,463,290,838<br>(4,593,626,162,082-6,182,327,833,044)    | 6,002,789,800,719<br>(5,117,116,532,753-6,941,796,338,554)    |
| Western Sub-Saharan Africa | Injuries   | 1,047,888,057,476<br>(817,377,432,862-1,253,442,678,200)      | 1,156,259,415,561<br>(939,581,913,820-1,377,357,290,486)      | 1,228,579,470,473<br>(1,010,042,422,496-1,434,721,432,403)    | 1,169,018,378,188<br>(988,649,977,722-1,361,295,320,386)      | 1,236,234,422,398<br>(1,066,274,005,823-1,410,929,633,210)    | 1,413,609,939,089<br>(1,232,015,127,753-1,607,723,867,478)    |
| Benin                      | All causes | 492,230,802,427<br>(468,486,737,052-517,074,638,317)          | 532,020,231,176<br>(504,906,642,894-560,430,185,130)          | 560,942,994,924<br>(526,572,106,031-598,339,559,614)          | 570,794,966,762<br>(522,086,078,997-625,087,414,492)          | 559,832,324,512<br>(485,372,225,311-649,156,739,038)          | 555,035,393,436<br>(456,806,899,399-681,786,952,731)          |
| Benin                      | Group I    | 372,150,698,450<br>(346,107,220,464-401,298,100,425)          | 391,857,809,609<br>(363,958,015,873-420,366,875,159)          | 398,420,408,954<br>(373,944,587,616-432,659,946,021)          | 398,420,408,954<br>(371,414,300,484-427,551,373,171)          | 365,214,990,717<br>(327,728,524,750-407,341,478,356)          | 330,633,250,844<br>(284,862,057,244-384,306,645,785)          |
| Benin                      | NCD        | 90,727,558,010<br>(73,628,550,017-110,730,973,203)            | 105,746,082,384<br>(87,738,682,359-125,558,749,856)           | 121,779,532,919<br>(99,995,382,090-147,282,363,523)           | 137,722,332,268<br>(111,710,469,575-168,742,990,506)          | 158,029,275,655<br>(122,885,470,980-204,106,634,114)          | 184,078,724,178<br>(136,430,489,053-250,595,590,935)          |
| Benin                      | Injuries   | 29,352,545,968<br>(19,003,801,570-39,663,173,325)             | 34,416,339,723<br>(23,996,168,006-44,513,335,718)             | 36,700,459,537<br>(26,176,222,461-45,786,575,406)             | 34,552,225,540<br>(26,948,462,867-43,120,155,845)             | 36,588,058,140<br>(26,542,996,650-48,799,709,549)             | 40,323,418,414<br>(28,021,322,414-58,777,837,925)             |
| Burkina Faso               | All causes | 1,023,979,741,046<br>(979,756,313,168-1,069,180,876,595)      | 1,127,794,678,998<br>(1,075,518,767,492-1,177,706,608,110)    | 1,195,336,604,559<br>(1,136,436,223,630-1,254,704,652,907)    | 1,187,840,154,305<br>(1,117,829,451,232-1,268,650,521,931)    | 1,144,199,743,158<br>(1,049,358,598,336-1,250,654,146,355)    | 1,123,577,720,523<br>(990,829,601,690-1,286,375,563,210)      |
| Burkina Faso               | Group I    | 820,480,251,890<br>(778,528,602,817-857,839,999,989)          | 906,965,537,825<br>(862,820,152,583-948,238,230,832)          | 952,301,615,830<br>(903,456,814,229-998,252,795,861)          | 935,847,323,140<br>(882,516,421,105-988,678,747,186)          | 863,345,330,849<br>(799,324,411,211-936,124,497,065)          | 786,291,093,618<br>(705,150,685-883,919,686,292)              |
| Burkina Faso               | NCD        | 152,453,392,238<br>(126,191,860,667-186,477,294,774)          | 166,762,874,358<br>(138,765,884,875-199,214,478,213)          | 186,806,333,356<br>(156,066,633,390-227,234,867,034)          | 195,783,554,548<br>(161,358,012,882-239,338,820,307)          | 221,421,637,398<br>(175,683,994,877-273,504,019,994)          | 265,242,423,083<br>(202,756,129,322-342,149,801,434)          |
| Burkina Faso               | Injuries   | 51,045,896,917<br>(39,184,532,672-64,845,657,583)             | 54,066,266,814<br>(43,608,374,234-65,949,949,845)             | 56,228,655,353<br>(47,134,828,868-66,972,455,525)             | 56,209,274,617<br>(47,268,175,235-68,277,907,081)             | 59,432,774,910<br>(47,907,385,741-74,491,346,550)             | 72,062,203,822<br>(55,410,359,952-93,779,678,149)             |
| Cameroon                   | All causes | 976,998,297,707<br>(925,790,201,671-1,034,128,319,137)        | 1,151,189,793,995<br>(1,086,383,111,129-1,220,440,281,069)    | 1,442,539,866,881<br>(1,257,831,700,575-1,436,718,206,707)    | 1,442,539,866,881<br>(1,338,203,113,338-1,550,926,352,585)    | 1,412,615,906,315<br>(1,267,923,774,589-1,564,261,408,369)    | 1,407,233,045,884<br>(1,193,571,022,407-1,653,526,696,027)    |
| Cameroon                   | Group I    | 701,917,149,718<br>(654,954,232,421-750,203,848,423)          | 836,112,849,652<br>(786,845,600,498-891,149,971,828)          | 980,191,988,375<br>(918,138,677,802-1,044,78                  |                                                               |                                                               |                                                               |

Appendix Table 3. DALYs for all causes and level 1 cause groups by location for 1990 - 2015, both sexes combined.

|               | Cause      | 1990                                                       | 1995                                                       | 2000                                                       | 2005                                                       | 2010                                                       | 2015                                                       |
|---------------|------------|------------------------------------------------------------|------------------------------------------------------------|------------------------------------------------------------|------------------------------------------------------------|------------------------------------------------------------|------------------------------------------------------------|
| Chad          | NCD        | 95,154,676,959<br>(77,723,101,207-116,941,951,267)         | 109,019,831,602<br>(88,424,510,675-132,422,881,507)        | 138,778,273,969<br>(112,887,539,794-171,444,520,950)       | 161,185,492,952<br>(126,189,517,371-206,311,231,275)       | 197,551,166,429<br>(146,465,101,292-260,604,559,193)       | 228,515,804,319<br>(163,839,354,492-307,438,526,456)       |
| Chad          | Injuries   | 47,286,928,743<br>(30,331,284,707-60,596,476,134)          | 40,059,599,223<br>(29,220,310,843-54,669,987,909)          | 57,590,417,007<br>(44,884,883,282-74,113,800,764)          | 58,709,144,403<br>(43,434,748,211-76,123,251,692)          | 72,911,213,007<br>(53,344,233,225-97,088,560,748)          | 80,724,374,283<br>(58,897,063,059-109,803,959,327)         |
| Cote d'Ivoire | All causes | 1,067,365,872,527<br>(840,581,375,023-1,299,995,691,657)   | 1,322,480,358,969<br>(1,237,955,956,494-1,402,285,697,950) | 1,487,062,470,820<br>(1,391,257,080,782-1,582,269,699,300) | 1,506,151,931,958<br>(1,406,124,517,464-1,606,741,026,277) | 1,433,843,576,987<br>(1,297,194,127,583-1,581,758,982,296) | 1,397,914,253,294<br>(1,208,518,338,986-1,639,316,873,751) |
| Cote d'Ivoire | Group I    | 784,610,642,483<br>(737,056,244,508-830,505,099,534)       | 1,065,009,445,687<br>(905,871,363,316-1,021,681,315,819)   | 1,085,455,442,861<br>(1,019,256,830,274-1,154,275,681,112) | 1,105,327,156,398<br>(1,036,250,262,855-1,173,253,097,317) | 1,013,387,429,755<br>(935,374,740,157-1,091,919,247,451)   | 923,630,139,288<br>(823,455,667,175-1,036,811,102,833)     |
| Cote d'Ivoire | NCD        | 223,075,749,542<br>(187,308,422,553-260,368,496,314)       | 282,012,726,374<br>(232,128,409,171-331,136,365,221)       | 316,794,639,768<br>(264,300,059,970-379,562,662,435)       | 341,087,678,255<br>(268,844,940,810-383,525,380,401)       | 341,087,678,255<br>(271,398,710,609-420,209,655,855)       | 387,630,387,768<br>(295,067,162,982-510,280,882,035)       |
| Cote d'Ivoire | Injuries   | 59,679,480,502<br>(45,918,231,477-74,264,160,451)          | 76,458,186,907<br>(60,449,918,219-92,732,641,432)          | 84,812,388,190<br>(67,332,173,449-104,217,494,852)         | 84,812,388,190<br>(62,617,549,559-94,294,088,330)          | 79,368,468,978<br>(61,080,335,329-98,789,261,785)          | 86,533,726,239<br>(62,382,451,435-120,319,927,145)         |
| The Gambia    | All causes | 62,656,396,366<br>(56,077,630,265-70,749,122,370)          | 66,919,294,220<br>(60,971,920,068-73,303,528,878)          | 68,718,111,678<br>(63,765,638,787-73,729,993,160)          | 70,765,549,284<br>(65,058,974,234-76,250,992,898)          | 72,279,808,530<br>(65,714,309,463-78,969,449,769)          | 73,316,423,854<br>(64,407,739,724-83,703,940,878)          |
| The Gambia    | Group I    | 44,843,833,906<br>(41,067,414,998-48,899,377,948)          | 46,953,615,282<br>(43,528,831,015-50,506,170,423)          | 46,873,159,605<br>(44,034,072,746-50,050,171,372)          | 46,873,159,605<br>(42,617,805,072-48,889,116,889)          | 44,552,489,946<br>(40,886,257,849-48,148,036,204)          | 42,160,609,636<br>(37,957,587,847-46,709,987,483)          |
| The Gambia    | NCD        | 14,285,031,026<br>(11,069,895,788-18,307,446,637)          | 16,108,624,601<br>(13,089,292,001-19,572,655,073)          | 17,327,157,132<br>(14,878,408,641-20,564,697,857)          | 20,469,861,667<br>(17,356,600,685-23,676,871,095)          | 22,991,927,438<br>(19,306,697,080-26,883,646,748)          | 26,159,001,514<br>(21,260,515,661-31,981,321,306)          |
| The Gambia    | Injuries   | 3,507,531,434<br>(2,634,746,605-4,605,364,017)             | 3,857,054,338<br>(3,059,573,682-4,864,280,631)             | 4,107,794,942<br>(3,460,812,801-4,832,674,195)             | 4,558,480,946<br>(3,863,250,652-5,296,555,260)             | 4,735,390,946<br>(3,958,853,278-5,723,954,196)             | 4,996,812,704<br>(3,987,543,832-6,336,830,165)             |
| Ghana         | All causes | 1,031,589,820,544<br>(942,884,573,432-1,139,136,293,414)   | 1,074,632,864,230<br>(971,292,712,784-1,129,441,032,882)   | 1,112,515,893,370<br>(1,020,504,575,071-1,215,308,511,504) | 1,182,104,918,517<br>(1,056,962,668,683-1,308,367,397,938) | 1,194,020,056,360<br>(1,017,590,868,977-1,402,180,315,979) | 1,137,705,300,066<br>(924,446,592,398-1,417,644,995,114)   |
| Ghana         | Group I    | 719,534,030,525<br>(668,909,948,049-770,068,453,106)       | 713,468,255,425<br>(673,239,843,314-755,552,988,356)       | 737,000,548,288<br>(693,032,399,854-785,535,301,072)       | 758,342,813,573<br>(704,242,180,125-815,948,822,415)       | 718,852,561,616<br>(649,522,522,896-799,248,403,731)       | 599,620,076,968<br>(519,666,631,369-698,696,756,114)       |
| Ghana         | NCD        | 251,879,163,610<br>(207,019,739,087-306,664,257,329)       | 270,928,023,391<br>(231,296,306,362-316,442,220,200)       | 311,263,396,072<br>(259,011,234,004-367,251,954,850)       | 353,270,640,125<br>(284,693,073,990-429,529,533,398)       | 400,547,559,595<br>(305,155,231,967-516,145,898,296)       | 454,529,728,201<br>(334,328,848,605-623,023,473,855)       |
| Ghana         | Injuries   | 60,186,626,409<br>(47,846,074,941-76,504,670,682)          | 65,236,585,414<br>(52,755,434,103-80,072,161,330)          | 64,251,949,011<br>(53,178,245,650-77,455,208,154)          | 70,991,464,813<br>(56,689,666,155-86,515,194,053)          | 74,619,935,149<br>(54,932,626,313-99,346,723,390)          | 83,555,984,838<br>(59,250,016,262-119,319,764,952)         |
| Guinea        | All causes | 733,730,438,605<br>(701,577,491,556-766,568,648,344)       | 825,968,829,795<br>(790,707,546,405-864,462,069,638)       | 847,284,766,086<br>(805,319,386,372-891,392,726,919)       | 818,444,619,463<br>(770,018,978,636-869,199,586,305)       | 804,025,267,277<br>(736,321,225,197-871,845,237,341)       | 808,983,724,000<br>(701,393,015,444-934,321,039,558)       |
| Guinea        | Group I    | 566,716,701,653<br>(531,812,659,346-602,536,052,231)       | 621,611,442,889<br>(585,286,260,394-659,360,790,753)       | 626,362,854,626<br>(587,033,624,316-666,097,403,016)       | 597,274,868,254<br>(556,529,142,861-633,918,678,163)       | 556,834,722,031<br>(511,123,414,286-601,659,186,034)       | 530,639,354,346<br>(468,896,223,804-595,963,669,418)       |
| Guinea        | NCD        | 132,380,230,551<br>(108,601,693,469-164,567,277,290)       | 162,072,072,023<br>(133,868,422,758-195,113,101,968)       | 175,870,417,985<br>(144,829,311,790-208,447,142,491)       | 179,877,782,961<br>(149,477,133,522-214,787,472,644)       | 202,911,844,916<br>(168,414,321,866-240,995,066,714)       | 231,293,525,443<br>(177,695,816,452-293,423,863,255)       |
| Guinea        | Injuries   | 45,633,506,401<br>(22,751,101,965-46,985,892,963)          | 42,285,314,882<br>(29,579,768,274-55,323,927,171)          | 45,051,493,476<br>(32,821,539,348-58,929,689,779)          | 41,291,968,248<br>(32,462,850,453-51,505,916,963)          | 44,278,700,330<br>(34,620,451,553-54,667,947,047)          | 47,050,844,211<br>(34,703,569,400-62,490,858,654)          |
| Guinea-Bissau | All causes | 120,611,920,536<br>(103,860,766,153-153,059,130,933)       | 127,352,425,075<br>(104,716,467,105-163,989,136,878)       | 133,518,095,618<br>(104,991,680,737-171,777,844,807)       | 133,518,095,618<br>(105,726,361,968-186,404,515,539)       | 135,904,833,485<br>(106,071,343,764-193,868,976,236)       | 138,117,864,663<br>(105,541,095,471-221,591,812,892)       |
| Guinea-Bissau | Group I    | 92,422,306,607<br>(82,411,828,867-107,441,369,228)         | 92,208,804,816<br>(81,485,640,935-109,962,589,200)         | 90,736,737,981<br>(79,922,544,014-111,769,786,546)         | 90,736,737,981<br>(78,240,100,216-115,989,550,322)         | 96,167,487,916<br>(75,191,140,701-113,857,715,706)         | 88,771,705,412<br>(71,641,737,476-118,559,408,660)         |
| Guinea-Bissau | NCD        | 21,837,591,782<br>(13,717,118,006-37,138,038,075)          | 23,840,676,785<br>(14,883,015,602-41,762,031,136)          | 26,405,591,652<br>(16,202,876,957-46,777,558,350)          | 30,560,175,965<br>(18,155,545,168-55,203,570,806)          | 34,845,949,124<br>(20,820,948,255-64,692,466,970)          | 38,694,007,917<br>(22,751,542,409-79,433,058,702)          |
| Guinea-Bissau | Injuries   | 7,532,922,148<br>(3,854,017,192-10,273,652,322)            | 7,506,314,435<br>(4,662,501,829-12,662,516,948)            | 8,185,095,443<br>(4,993,762,647-13,881,009,983)            | 9,341,431,738<br>(5,676,379,462-16,185,394,432)            | 10,482,761,604<br>(6,452,964,757-18,311,708,578)           | 10,652,315,335<br>(6,485,793,513-20,998,970,589)           |
| Liberia       | All causes | 278,066,160,436<br>(256,649,979,800-301,248,971,963)       | 255,662,358,478<br>(240,362,982,452-271,436,749,040)       | 257,296,888,921<br>(242,655,948,632-273,057,990,225)       | 242,741,074,201<br>(227,294,233,412-259,783,661,931)       | 234,822,017,057<br>(213,849,181,692-256,765,423,244)       | 225,598,205,071<br>(196,430,885,020-259,053,547,010)       |
| Liberia       | Group I    | 201,784,721,535<br>(187,128,455,135-214,486,845,154)       | 195,108,212,336<br>(183,305,097,634-207,584,546,699)       | 201,110,786,326<br>(188,645,760,244-214,349,710,970)       | 182,842,580,584<br>(171,597,292,021-194,734,760,558)       | 162,916,525,348<br>(150,372,638,723-176,606,002,103)       | 146,389,803,074<br>(130,944,519,126-189,879,946,946)       |
| Liberia       | NCD        | 40,268,665,702<br>(31,727,905,487-51,636,953,550)          | 35,262,665,069<br>(28,086,572,610-44,783,902,993)          | 43,573,320,428<br>(35,062,683,898-53,659,732,259)          | 48,141,711,810<br>(39,981,371,888-58,062,467,474)          | 58,640,069,342<br>(47,635,892,517-70,367,866,686)          | 65,650,608,649<br>(51,644,102,444-82,549,694,098)          |
| Liberia       | Injuries   | 36,012,773,200<br>(20,313,777,558-53,695,504,941)          | 25,291,491,073<br>(15,210,469,135-36,355,567,409)          | 12,612,781,967<br>(9,815,292,502-15,877,802,977)           | 11,756,781,807<br>(9,602,508,952-14,573,349,830)           | 13,221,422,367<br>(10,578,772,068-16,554,129,151)          | 13,557,793,349<br>(10,209,629,085-17,731,527,121)          |
| Mali          | All causes | 1,098,314,423,664<br>(1,056,818,704,637-1,137,580,305,634) | 1,156,668,183,349<br>(1,110,572,692,664-1,201,101,866,394) | 1,213,167,590,995<br>(1,160,850,090,139-1,268,693,366,017) | 1,226,647,552,343<br>(1,160,472,660,659-1,293,392,777,152) | 1,249,400,846,031<br>(1,163,035,786,993-1,341,606,736,054) | 1,276,219,589,438<br>(1,139,871,375,393-1,452,680,324,714) |
| Mali          | Group I    | 870,122,697,415<br>(812,782,814,052-918,335,349,513)       | 913,200,485,217<br>(857,571,980,079-963,341,391,818)       | 942,667,492,930<br>(884,764,560,136-999,909,522,814)       | 960,617,535,043<br>(900,200,599,598-1,022,373,409,008)     | 944,400,998,600<br>(868,162,411,071-1,023,111,648,011)     | 938,015,499,067<br>(830,572,091,493-1,051,118,196,822)     |
| Mali          | NCD        | 172,525,454,026<br>(141,494,858,875-213,723,646,449)       | 183,229,744,136<br>(152,799,070,868-230,189,717,767)       | 194,460,911,836<br>(156,735,276,536-242,831,114,305)       | 201,840,654,041<br>(161,951,839,619-251,596,026,101)       | 232,835,659,186<br>(188,193,058,858-287,858,566,126)       | 261,690,297,593<br>(206,282,475,469-332,160,607,900)       |
| Mali          | Injuries   | 55,666,280,623<br>(39,625,396,646-73,396,090,209)          | 58,237,953,997<br>(41,968,704,517-76,673,852,206)          | 76,039,126,229<br>(56,677,294,726-101,937,470,186)         | 64,189,362,900<br>(48,875,571,598-82,952,722,674)          | 76,513,792,778<br>(54,933,521,201-93,973,733,686)          | 76,513,792,778<br>(59,422,555,469-98,158,727,262)          |
| Mauritania    | All causes | 136,560,862,598<br>(127,908,811,248-146,196,465,405)       | 143,159,236,411<br>(134,234,917,733-153,419,315,769)       | 149,313,615,770<br>(138,480,867,402-160,297,781,616)       | 154,197,898,066<br>(141,322,863,551-168,158,828,309)       | 149,703,991,193<br>(134,212,285,655-166,659,609,019)       | 149,190,701,627<br>(127,290,924,719-173,430,331,591)       |
| Mauritania    | Group I    | 92,614,461,351<br>(86,539,188,896-99,967,054,004)          | 96,463,234,956<br>(89,672,763,382-104,665,348,806)         | 97,463,223,704<br>(90,362,987,315-105,368,954,770)         | 97,991,911,336<br>(90,278,756,404-106,767,527,149)         | 88,422,038,039<br>(79,508,220,924-97,406,965,857)          | 79,765,540,235<br>(70,342,666,498-90,632,539,454)          |
| Mauritania    | NCD        | 33,928,326,530<br>(28,773,707,259-39,561,866,185)          | 37,608,823,800<br>(31,793,861,501-43,900,878,863)          | 41,498,321,727<br>(34,603,847,875-48,747,484,551)          | 45,214,043,377<br>(36,948,741,926-53,615,817,665)          | 50,272,897,715<br>(40,352,098,664-60,030,984,092)          | 57,741,044,917<br>(45,299,169,121-72,746,938,277)          |
| Mauritania    | Injuries   | 10,018,074,717<br>(6,842,004,411-13,092,893,355)           | 9,087,177,654<br>(6,402,483,331-11,338,847,608)            | 10,352,070,339<br>(8,416,645,139-12,429,675,191)           | 10,991,943,353<br>(8,684,922,841-13,593,160,956)           | 10,989,055,439<br>(8,436,075,021-14,329,448,131)           | 11,684,116,475<br>(8,730,044,804-15,933,392,501)           |
| Niger         | All causes | 1,302,568,231,848<br>(1,262,365,351,522-1,348,100,891,565) | 1,391,789,778,832<br>(1,341,813,176,128-1,448,872,984,549) | 1,420,545,231,600<br>(1,363,776,857,164-1,479,889,032,786) | 1,376,336,979,462<br>(1,307,370,216,621-1,446,586,198,802) | 1,340,044,613,628<br>(1,243,472,371,300-1,438,261,064,664) | 1,395,604,281,920<br>(1,247,107,301,085-1,569,955,255,226) |
| Niger         | Group I    |                                                            |                                                            |                                                            |                                                            |                                                            |                                                            |

Appendix Table 3. DALYs for all causes and level 1 cause groups by location for 1990 - 2015, both sexes combined.

|                            | Cause      | 1990                                                          | 1995                                                          | 2000                                                          | 2005                                                          | 2010                                                          | 2015                                                          |
|----------------------------|------------|---------------------------------------------------------------|---------------------------------------------------------------|---------------------------------------------------------------|---------------------------------------------------------------|---------------------------------------------------------------|---------------------------------------------------------------|
| Sao Tome and Principe      | Group I    | 4,164,836,958<br>(3,860,339,650-4,571,655,571)                | 4,033,483,547<br>(3,720,302,514-4,396,943,362)                | 3,709,102,693<br>(3,402,150,332-4,029,122,940)                | 3,308,698,338<br>(2,967,572,532-3,688,872,131)                | 2,882,823,888<br>(2,518,559,216-3,308,502,644)                | 2,619,890,888<br>(2,196,613,423-3,098,902,258)                |
| Sao Tome and Principe      | NCD        | 2,251,112,928<br>(1,949,051,675-2,575,535,546)                | 2,442,995,741<br>(2,088,329,535-2,787,117,741)                | 2,692,871,675<br>(2,348,251,317-3,035,300,910)                | 2,886,944,873<br>(2,489,770,172-3,338,637,671)                | 3,072,677,584<br>(2,480,107,717-3,749,574,463)                | 3,296,302,785<br>(2,480,400,868-4,323,277,580)                |
| Sao Tome and Principe      | Injuries   | 433,967,030<br>(320,663,440-529,040,343)                      | 460,221,972<br>(364,211,672-557,055,141)                      | 486,949,503<br>(400,871,577-589,016,571)                      | 486,949,503<br>(393,632,609-597,882,224)                      | 486,949,503<br>(367,662,501-640,338,561)                      | 486,949,503<br>(337,013,684-609,636,611)                      |
| Senegal                    | All causes | 607,613,560,664<br>(578,019,633,009-638,706,916,341)          | 663,474,029,018<br>(613,227,777,099-686,276,949,233)          | 635,415,037,595<br>(622,359,223,476-706,191,975,847)          | 635,415,037,595<br>(579,709,003,720-702,459,966,061)          | 618,616,733,805<br>(531,932,425,313-724,004,404,098)          | 618,616,733,805<br>(508,791,947,911-773,785,557,577)          |
| Senegal                    | Group I    | 451,995,525,346<br>(426,962,604,609-473,340,316,554)          | 474,939,275,321<br>(448,874,411,372-496,691,556,051)          | 472,645,877,339<br>(445,439,723,367-498,511,479,942)          | 472,645,877,339<br>(390,219,549,650-454,515,907,875)          | 472,645,877,339<br>(340,062,428,110-426,925,611,394)          | 472,645,877,339<br>(296,597,545,009-409,586,244,248)          |
| Senegal                    | NCD        | 121,090,178,925<br>(102,015,921,460-144,081,715,912)          | 136,248,440,903<br>(114,941,965,729-159,062,667,287)          | 151,387,102,646<br>(128,275,747,783-177,096,405,804)          | 151,387,102,646<br>(140,088,858,369-206,068,241,093)          | 151,387,102,646<br>(148,484,298,410-244,827,204,462)          | 151,387,102,646<br>(168,197,356,957-302,789,200,360)          |
| Senegal                    | Injuries   | 34,527,855,793<br>(27,781,670,487-43,057,790,561)             | 39,290,409,010<br>(32,399,156,050-47,554,696,825)             | 39,441,049,033<br>(32,570,383,983-47,459,606,890)             | 39,441,049,033<br>(34,082,856,647-52,645,809,446)             | 39,441,049,033<br>(32,532,807,764-58,895,776,315)             | 39,441,049,033<br>(34,377,058,861-48,955,610,741)             |
| Sierra Leone               | All causes | 483,374,924,247<br>(460,807,026,699-520,634,418,507)          | 481,191,685,250<br>(456,806,343,616-509,944,741,155)          | 471,790,361,586<br>(450,398,724,885-494,979,227,109)          | 471,790,361,586<br>(477,992,565,259-526,506,597,148)          | 471,790,361,586<br>(449,769,727,537-512,806,558,718)          | 471,790,361,586<br>(400,234,009,805-505,008,916,232)          |
| Sierra Leone               | Group I    | 362,552,174,483<br>(325,712,622,110-391,892,764,646)          | 343,998,226,045<br>(312,433,667,728-369,036,465,877)          | 347,678,417,884<br>(315,588,867,619-372,159,448,179)          | 347,678,417,884<br>(322,482,798,389-388,305,882,660)          | 347,678,417,884<br>(329,485,129,478-354,481,729,850)          | 347,678,417,884<br>(255,569,878,200-319,580,275,273)          |
| Sierra Leone               | NCD        | 102,067,349,966<br>(75,799,123,785-138,391,924,128)           | 93,949,661,128<br>(70,971,200,755-128,504,870,012)            | 95,063,250,040<br>(72,889,258,586-130,181,768,282)            | 95,063,250,040<br>(89,967,151,650-146,662,530,200)            | 95,063,250,040<br>(98,532,831,316-157,002,645,043)            | 95,063,250,040<br>(101,397,376,959-172,617,554,589)           |
| Sierra Leone               | Injuries   | 23,755,399,798<br>(14,578,898,434-32,857,750,708)             | 43,243,798,077<br>(27,934,558,585-61,543,010,705)             | 29,048,693,661<br>(20,533,184,136-38,954,308,219)             | 29,048,693,661<br>(19,723,315,051-32,029,838,810)             | 29,048,693,661<br>(18,923,551,979-33,545,788,362)             | 29,048,693,661<br>(19,118,719,973-35,764,436,250)             |
| Togo                       | All causes | 302,846,226,384<br>(286,993,193,458-320,604,898,827)          | 324,816,613,928<br>(305,745,525,897-345,895,380,514)          | 359,691,864,010<br>(335,058,196,739-386,239,965,490)          | 359,691,864,010<br>(365,190,985,779-427,380,015,048)          | 359,691,864,010<br>(364,107,670,019-439,323,772,350)          | 359,691,864,010<br>(331,630,976,135-444,810,462,621)          |
| Togo                       | Group I    | 216,108,705,695<br>(203,878,873,367-227,601,345,854)          | 228,744,551,058<br>(215,512,573,983-241,520,324,153)          | 251,501,714,357<br>(236,673,812,933-269,264,552,373)          | 251,501,714,357<br>(257,376,606,256-293,922,299,169)          | 251,501,714,357<br>(249,669,749,885-292,507,359,881)          | 251,501,714,357<br>(212,140,822,774-264,209,608,488)          |
| Togo                       | NCD        | 70,179,977,438<br>(60,095,635,795-82,015,951,986)             | 77,361,190,817<br>(65,430,996,929-80,807,689,793)             | 87,395,152,620<br>(72,500,340,924-102,020,331,211)            | 87,395,152,620<br>(79,410,169,878-112,052,765,703)            | 87,395,152,620<br>(87,526,307,731-120,117,560,362)            | 87,395,152,620<br>(95,664,861,739-156,211,780,138)            |
| Togo                       | Injuries   | 16,557,543,251<br>(13,234,607,310-20,062,251,547)             | 16,557,543,251<br>(15,371,552,063-22,766,863,602)             | 20,794,997,033<br>(16,876,455,637-25,048,014,994)             | 20,794,997,033<br>(20,068,282,899-30,044,981,397)             | 20,794,997,033<br>(18,526,818,222-29,298,864,311)             | 20,794,997,033<br>(18,532,356,478-34,277,060,797)             |
| Eastern Sub-Saharan Africa | All causes | 19,564,992,650,389<br>(18,863,863,264,747-20,323,987,720,878) | 20,987,359,389,119<br>(20,170,967,700,785-21,807,151,690,345) | 22,115,113,129,037<br>(21,199,201,866,553-22,991,965,508,127) | 22,115,113,129,037<br>(19,928,154,510,170-21,845,581,085,497) | 22,115,113,129,037<br>(18,150,410,961,261-20,565,031,385,339) | 22,115,113,129,037<br>(17,221,026,254,795-20,321,419,553,877) |
| Eastern Sub-Saharan Africa | Group I    | 14,553,761,333,880<br>(14,085,366,358,358-15,070,762,369,065) | 15,946,908,799,616<br>(15,430,989,150,975-16,472,557,848,215) | 16,433,844,821,795<br>(15,889,628,876,413-17,016,584,415,993) | 16,433,844,821,795<br>(14,570,020,689,993-15,710,301,782,295) | 16,433,844,821,795<br>(12,378,574,118,997-13,539,731,061,865) | 16,433,844,821,795<br>(10,693,374,006,466-12,084,931,066,881) |
| Eastern Sub-Saharan Africa | NCD        | 3,524,548,390,887<br>(3,135,749,295,900-3,923,358,043,415)    | 3,824,845,955,610<br>(3,392,977,960,717-4,279,157,042,313)    | 4,147,775,056,005<br>(3,685,888,527,767-4,614,821,761,191)    | 4,147,775,056,005<br>(4,021,982,065,900-5,066,196,904,344)    | 4,147,775,056,005<br>(4,416,041,510,992-5,759,576,097,718)    | 4,147,775,056,005<br>(5,046,347,412,542-6,746,785,338,745)    |
| Eastern Sub-Saharan Africa | Injuries   | 1,486,683,126,111<br>(1,214,026,182,951-1,753,010,344,275)    | 1,486,683,126,111<br>(1,007,699,697,339-1,393,325,818,666)    | 1,529,353,191,308<br>(1,271,970,249,149-1,802,479,229,488)    | 1,529,353,191,308<br>(1,080,464,249,114-1,338,868,688,910)    | 1,529,353,191,308<br>(1,164,166,713,486-1,463,119,604,832)    | 1,529,353,191,308<br>(1,269,746,770,694-1,681,836,068,490)    |
| Burundi                    | All causes | 686,521,100,217<br>(608,309,155,585-778,302,508,898)          | 750,997,477,593<br>(689,113,119,165-817,989,414,263)          | 727,927,547,954<br>(675,641,591,349-788,955,864,650)          | 727,927,547,954<br>(568,979,608,363-661,934,261,041)          | 727,927,547,954<br>(501,506,585,588-631,568,290,133)          | 727,927,547,954<br>(494,684,188,751-751,945,092,185)          |
| Burundi                    | Group I    | 503,783,668,984<br>(453,189,296,433-559,474,298,863)          | 549,303,515,552<br>(505,314,387,395-595,904,558,253)          | 540,532,040,944<br>(501,343,697,442-583,802,400,401)          | 540,532,040,944<br>(406,837,931,189-472,993,632,753)          | 540,532,040,944<br>(338,333,980,966-622,147,878,604)          | 540,532,040,944<br>(305,313,541,821-472,897,951,211)          |
| Burundi                    | NCD        | 138,810,192,811<br>(105,509,228,096-172,702,605,851)          | 146,256,908,678<br>(120,515,137,581-172,297,790,133)          | 133,817,423,254<br>(112,596,993,793-156,964,119,487)          | 133,817,423,254<br>(112,858,832,957-152,833,432,747)          | 133,817,423,254<br>(117,373,384,910-174,471,171,711)          | 133,817,423,254<br>(139,153,195,986-230,523,961,257)          |
| Burundi                    | Injuries   | 43,927,238,422<br>(29,401,887,909-58,406,242,580)             | 55,437,053,363<br>(40,182,875,461-70,865,590,036)             | 54,578,074,657<br>(41,376,556,966-70,240,775,447)             | 54,578,074,657<br>(30,863,538,069-92,882,472,062)             | 54,578,074,657<br>(40,014,110,816)                            | 54,578,074,657<br>(36,736,163,518-70,094,399,673)             |
| Comoros                    | All causes | 30,982,894,538<br>(27,372,524,757-35,888,301,768)             | 30,697,454,117<br>(27,490,944,914-34,408,196,633)             | 29,285,296,416<br>(26,204,287,634-32,900,754,640)             | 29,285,296,416<br>(23,442,011,496-31,675,103,945)             | 29,285,296,416<br>(22,352,772,884-31,696,511,939)             | 29,285,296,416<br>(22,100,258,831-34,029,420,177)             |
| Comoros                    | Group I    | 20,806,022,992<br>(18,799,235,066-23,128,762,666)             | 19,792,130,278<br>(17,826,731,605-22,057,289,424)             | 18,867,886,426<br>(16,094,167,750-21,142,812,616)             | 18,867,886,426<br>(13,506,798,847-19,650,368,730)             | 18,867,886,426<br>(14,668,362,705)                            | 18,867,886,426<br>(10,780,001,061-17,654,446,345)             |
| Comoros                    | NCD        | 7,952,504,889<br>(6,135,292,745-10,175,604,679)               | 8,616,762,699<br>(7,141,274,135-10,344,351,942)               | 8,769,995,164<br>(7,500,855,460-10,176,125,186)               | 8,769,995,164<br>(7,377,134,799-10,392,850,409)               | 8,769,995,164<br>(8,257,693,097-11,633,407,721)               | 8,769,995,164<br>(11,382,853,102)                             |
| Comoros                    | Injuries   | 2,224,366,668<br>(1,497,910,123-3,079,126,942)                | 2,288,561,140<br>(1,673,524,886-2,984,218,627)                | 2,147,414,826<br>(1,612,826,488-2,728,492,307)                | 2,147,414,826<br>(1,580,618,588-2,692,493,205)                | 2,147,414,826<br>(1,647,751,755-2,856,230,305)                | 2,147,414,826<br>(1,618,202,435-3,116,587,092)                |
| Djibouti                   | All causes | 36,120,310,283<br>(32,147,349,257-41,373,607,608)             | 40,859,315,605<br>(35,471,927,642-48,321,859,069)             | 41,944,693,085<br>(34,530,760,106-53,207,129,416)             | 41,944,693,085<br>(33,603,903,005-53,796,735,344)             | 41,944,693,085<br>(31,761,252,910-53,836,095,949)             | 41,944,693,085<br>(30,798,615,906-53,637,945,513)             |
| Djibouti                   | Group I    | 22,904,202,355<br>(20,889,695,839-25,518,150,196)             | 25,669,542,219<br>(22,977,677,552-29,251,660,655)             | 25,709,212,769<br>(22,248,138,702-29,909,023,242)             | 25,709,212,769<br>(20,542,343,089-28,851,396,911)             | 25,709,212,769<br>(17,786,595,614-26,080,552,110)             | 25,709,212,769<br>(15,660,395,608-23,806,489,694)             |
| Djibouti                   | NCD        | 10,021,914,708<br>(7,948,630,556-12,540,608,439)              | 11,583,400,709<br>(8,776,846,346-15,166,347,774)              | 12,648,475,818<br>(9,041,869,119-17,799,729,470)              | 12,648,475,818<br>(9,959,139,398-20,160,281,776)              | 12,648,475,818<br>(10,889,087,054-22,466,404,414)             | 12,648,475,818<br>(11,842,269,543-24,366,766,413)             |
| Djibouti                   | Injuries   | 3,104,193,219<br>(2,222,422,252-4,076,866,215)                | 3,606,372,677<br>(2,505,192,053-4,978,956,711)                | 3,587,004,498<br>(2,192,406,035-5,528,885,747)                | 3,587,004,498<br>(2,447,797,935-5,880,671,478)                | 3,587,004,498<br>(2,506,280,575-6,112,889,561)                | 3,587,004,498<br>(2,503,212,881-6,474,666,287)                |
| Eritrea                    | All causes | 204,538,963,711<br>(191,200,310,492-221,694,129,910)          | 152,791,487,071<br>(141,176,950,919-168,208,005,222)          | 133,875,906,564<br>(118,173,197,689-151,639,418,353)          | 133,875,906,564<br>(121,656,451,062-172,963,471,011)          | 133,875,906,564<br>(122,227,203,881-189,555,279,633)          | 133,875,906,564<br>(116,246,703,595-187,617,996,557)          |
| Eritrea                    | Group I    | 54,099,049,343<br>(44,326,977,381-62,896,184,644)             | 54,099,049,343<br>(38,236,344,667-55,650,012,183)             | 51,877,402,996<br>(39,872,698,060-65,955,181,691)             | 51,877,402,996<br>(47,973,646,321-87,485,730,808)             | 51,877,402,996<br>(54,339,392,594-105,099,128,874)            | 51,877,402,996<br>(61,360,484,727-126,614,643,295)            |
| Eritrea                    | Injuries   | 17,517,614,160<br>(11,505,188,791-23,077,326,311)             | 14,247,241,439<br>(9,748,005,406-18,740,702,527)              | 13,433,838,838<br>(135,124,849,955-590,555,457,666)           | 13,433,838,838<br>(16,050,512,083-29,935,545,091)             | 13,433,838,838<br>(16,922,765,845-35,156,590,991)             | 13,433,838,838<br>(16,897,380,883-37,924,483,257)             |
| Ethiopia                   | All causes | 6,257,295,750,203<br>(5,919,281,097,568-6,600,124,258,392)    | 6,253,083,982,965<br>(5,948,272,551,284-6,549,640,595,890)    | 6,082,754,308,666<br>(5,755,569,255,967-6,413,767,888,982)    | 6,082,754,308,666<br>(5,098,001,939,390-5,779,357,217,041)    | 6,082,754,308,666<br>(4,040,900,663,575-5,031,375,512,819)    | 6,082,754,308,666<br>(3,464,260,349,806-4,921,110,576,804)    |
| Ethiopia                   | Group I    | 4,483,529,612,097<br>(4,227,375,506,204-4,725,552,887,730)    | 4,736,740,065,148<br>(4,464,350,818,075-5,079,599,377,617)    |                                                               |                                                               |                                                               |                                                               |

**Appendix Table 3. DALYs for all causes and level 1 cause groups by location for 1990 - 2015, both sexes combined.**

|             | Cause      | 1990                                                       | 1995                                                       | 2000                                                       | 2005                                                       | 2010                                                       | 2015                                                       |
|-------------|------------|------------------------------------------------------------|------------------------------------------------------------|------------------------------------------------------------|------------------------------------------------------------|------------------------------------------------------------|------------------------------------------------------------|
| Madagascar  | All causes | 995,184,048,606<br>(936,076,438,255-1,052,939,089,605)     | 1,075,678,743,233<br>(1,009,814,463,008-1,143,510,851,433) | 1,058,288,920,086<br>(986,200,053,066-1,136,433,812,998)   | 1,011,691,123,208<br>(927,692,819,980-1,108,790,521,176)   | 1,060,532,928,117<br>(913,543,169,004-1,221,022,672,173)   | 1,106,864,138,438<br>(895,239,113,461-1,361,526,242,993)   |
| Madagascar  | Group I    | 712,324,647,673<br>(666,934,813,986-767,496,920,393)       | 722,217,006,516<br>(710,307,480,762-835,150,463,254)       | 765,974,062,723<br>(665,348,139,880-810,026,606,366)       | 765,974,062,723<br>(589,263,348,752-733,576,152,049)       | 765,974,062,723<br>(553,356,165,127-741,831,760,971)       | 765,974,062,723<br>(509,203,676,469-752,297,395,317)       |
| Madagascar  | NCD        | 231,664,603,962<br>(198,717,265,656-259,352,087,912)       | 255,453,962,098<br>(210,631,762,271-291,234,513,912)       | 280,133,605,084<br>(221,013,227,630-324,315,882,742)       | 310,153,831,174<br>(244,953,648,570-365,150,760,086)       | 360,290,033,143<br>(278,375,313,739-441,875,522,462)       | 422,306,460,735<br>(313,454,713,248-556,373,212,049)       |
| Madagascar  | Injuries   | 51,194,796,971<br>(36,425,423,683-65,454,722,351)          | 53,297,774,619<br>(37,409,857,572-68,247,089,769)          | 55,944,221,522<br>(38,561,368,307-72,116,693,602)          | 55,662,649,310<br>(40,427,991,678-70,371,467,863)          | 62,378,156,591<br>(44,988,824,247-81,894,910,612)          | 70,292,634,445<br>(48,016,295,184-101,135,961,298)         |
| Malawi      | All causes | 1,185,053,004,023<br>(1,122,004,507,533-1,248,935,012,947) | 1,298,401,379,293<br>(1,140,767,094,936-1,313,333,632,753) | 1,055,317,438,777<br>(977,498,666,961-1,137,090,853,840)   | 1,055,317,438,777<br>(889,629,804,825-1,047,589,560,948)   | 1,185,053,004,023<br>(1,000,954,890,214-1,185,446,426,221) | 1,185,053,004,023<br>(870,644,464,558-1,154,392,798,274)   |
| Malawi      | Group I    | 970,675,426,738<br>(916,484,726,717-1,027,304,710,094)     | 1,001,084,902,246<br>(935,855,521,180-1,073,276,897,713)   | 1,055,317,438,777<br>(977,498,666,961-1,137,090,853,840)   | 1,055,317,438,777<br>(889,629,804,825-1,047,589,560,948)   | 1,185,053,004,023<br>(1,000,954,890,214-1,185,446,426,221) | 1,185,053,004,023<br>(870,644,464,558-1,154,392,798,274)   |
| Malawi      | NCD        | 160,786,970,040<br>(133,490,408,927-192,635,464,597)       | 167,120,051,035<br>(136,043,932,244-203,653,054,682)       | 189,577,090,984<br>(151,977,179,824-234,662,261,357)       | 199,632,589,213<br>(163,423,866,411-242,764,750,999)       | 217,929,646,124<br>(179,475,196,589-258,495,125,082)       | 253,384,419,325<br>(197,574,817,042-318,813,058,828)       |
| Malawi      | Injuries   | 53,990,607,246<br>(37,211,581,280-71,096,972,485)          | 50,470,096,244<br>(36,018,729,218-67,107,600,843)          | 50,470,096,244<br>(39,572,649,493-65,525,985,985)          | 50,470,096,244<br>(39,572,649,493-65,525,985,985)          | 51,931,485,603<br>(40,764,564,922-65,760,061,962)          | 59,560,777,177<br>(44,302,336,360-78,883,660,658)          |
| Mozambique  | All causes | 1,590,215,556,708<br>(1,524,280,323,817-1,661,423,379,962) | 1,693,719,402,222<br>(1,619,054,356,259-1,773,611,209,084) | 1,800,412,744,865<br>(1,703,122,890,423-1,912,252,861,822) | 1,861,117,688,680<br>(1,715,724,422,471-2,016,105,831,767) | 1,865,452,476,050<br>(1,672,564,346,990-2,076,266,409,442) | 1,794,290,597,625<br>(1,541,020,074,124-2,103,986,744,175) |
| Mozambique  | Group I    | 1,266,470,308,840<br>(1,202,668,459,085-1,325,960,032,342) | 1,339,992,788,105<br>(1,276,369,042,362-1,408,632,057,599) | 1,392,996,931,009<br>(1,324,873,290,819-1,478,394,098,342) | 1,426,777,936,900<br>(1,330,019,735,073-1,538,586,806,423) | 1,359,167,069,228<br>(1,244,566,326,518-1,493,372,436,657) | 1,216,491,374,516<br>(1,075,120,331,158-1,366,835,328,316) |
| Mozambique  | NCD        | 233,081,313,040<br>(198,741,497,909-271,761,373,675)       | 269,054,233,640<br>(228,858,141,448-309,073,071,891)       | 314,083,100,679<br>(266,636,874,404-362,398,357,959)       | 345,706,279,914<br>(287,662,540,421-356,056,073)           | 405,742,485,709<br>(320,315,484,012-503,062,794,062)       | 466,814,783,310<br>(347,640,573,073-616,079,627,505)       |
| Mozambique  | Injuries   | 90,663,934,828<br>(71,735,148,517-118,689,137,010)         | 84,672,380,512<br>(68,545,406,962-107,344,172,834)         | 93,322,713,177<br>(77,663,820,985-109,529,110,947)         | 88,633,471,867<br>(70,790,916,698-108,039,220,904)         | 100,542,921,114<br>(75,326,929,839-129,704,353,941)        | 110,984,439,799<br>(76,738,221,523-158,123,239,119)        |
| Rwanda      | All causes | 711,162,482,296<br>(671,067,628,493-757,071,166,830)       | 810,615,110,440<br>(753,257,482,592-856,391,480,973)       | 769,431,052,366<br>(724,100,195,492-816,095,703,037)       | 581,914,937,235<br>(541,148,948,966-626,134,800,690)       | 481,711,851,519<br>(427,853,507,226-539,614,246,804)       | 483,540,862,813<br>(407,992,934,348-581,952,911,388)       |
| Rwanda      | Group I    | 498,329,367,389<br>(464,257,814,742-533,998,179,286)       | 555,871,861,273<br>(516,745,000,590-597,482,686,770)       | 546,098,267,133<br>(510,625,236,927-582,591,787,483)       | 594,817,689,475<br>(568,200,868,669-624,832,644,188)       | 286,490,005,955<br>(257,266,808,869-312,809,927,746)       | 259,665,594,034<br>(220,838,805,684-307,453,073,849)       |
| Rwanda      | NCD        | 140,591,058,879<br>(118,898,683,474-163,302,766,667)       | 147,508,222,639<br>(127,492,210,716-170,636,781,593)       | 153,901,918,320<br>(131,877,460,400-178,629,415,323)       | 143,309,652,109<br>(111,892,327,696-153,766,410,138)       | 143,309,652,109<br>(118,489,875,170-170,257,813,825)       | 169,503,326,978<br>(133,914,508,905-214,589,248,540)       |
| Rwanda      | Injuries   | 72,242,416,029<br>(53,475,735,962-93,937,313,002)          | 107,269,026,528<br>(71,313,528,324-136,598,587,395)        | 69,430,866,851<br>(53,417,595,457-87,159,163,973)          | 54,697,595,651<br>(43,443,485,162-69,606,795,215)          | 51,851,238,444<br>(40,059,760,521-67,581,315,642)          | 54,524,931,801<br>(40,238,003,324-74,606,623,534)          |
| Somalia     | All causes | 752,680,558,333<br>(617,621,962,967-979,059,661,544)       | 555,770,683,248<br>(479,042,029,096-669,672,805,049)       | 577,982,678,574<br>(490,165,728,718-715,171,166,702)       | 586,970,460,673<br>(488,464,275,014-762,816,827,112)       | 651,133,111,270<br>(501,238,828,528-871,168,173,155)       | 576,251,470,510<br>(460,106,174,542-787,215,496,882)       |
| Somalia     | Group I    | 550,517,099,232<br>(473,205,883,383-665,403,930,261)       | 555,770,683,248<br>(479,042,029,096-669,672,805,049)       | 577,982,678,574<br>(490,165,728,718-715,171,166,702)       | 586,970,460,673<br>(488,464,275,014-762,816,827,112)       | 651,133,111,270<br>(501,238,828,528-871,168,173,155)       | 576,251,470,510<br>(460,106,174,542-787,215,496,882)       |
| Somalia     | NCD        | 135,076,453,342<br>(82,634,445,594-218,887,577,369)        | 131,307,894,731<br>(80,258,320,605-208,753,034,309)        | 141,496,398,751<br>(86,861,589,542-225,300,213,146)        | 152,185,492,793<br>(93,547,119,875-254,159,463,739)        | 176,557,443,700<br>(110,244,612,154-309,684,785,040)       | 192,655,934,856<br>(120,396,580,203-332,705,702,852)       |
| Somalia     | Injuries   | 67,086,405,759<br>(45,123,301,396-97,225,551,368)          | 53,394,710,814<br>(34,558,294,850-85,342,405,765)          | 55,359,435,849<br>(33,437,385,185-90,712,498,016)          | 57,258,786,614<br>(34,572,632,962-95,560,000,320)          | 81,385,359,155<br>(53,768,414,471-136,539,950,667)         | 86,558,083,230<br>(56,944,929,616-135,888,808,984)         |
| South Sudan | All causes | 668,584,085,381<br>(569,079,587,156-839,857,262,015)       | 582,119,685,974<br>(486,354,228,698-753,985,946,794)       | 582,506,206,388<br>(469,749,958,517-807,025,932,546)       | 637,611,477,310<br>(501,638,432,643-950,023,375,597)       | 735,931,315,641<br>(565,209,762,172-1,140,903,691,414)     | 667,657,974,766<br>(466,354,522,562-1,236,145,072,015)     |
| South Sudan | Group I    | 514,611,354,330<br>(451,760,083,060-607,662,917,582)       | 446,493,329,775<br>(390,624,981,175-540,385,487,255)       | 437,620,144,726<br>(371,533,119,577-558,290,065,905)       | 469,929,699,737<br>(388,699,708,996-629,585,351,827)       | 520,433,304,703<br>(404,707,560,611-729,905,077,795)       | 571,099,409,945<br>(443,252,137,483-813,947,851,476)       |
| South Sudan | NCD        | 111,079,724,216<br>(71,826,189,750-178,669,137,378)        | 100,796,248,131<br>(63,696,365,557-165,405,202,825)        | 110,659,882,236<br>(69,657,127,419-161,441,554,502)        | 129,730,352,508<br>(81,512,697,340-230,433,537,009)        | 166,035,809,904<br>(104,891,379,930-315,451,620,331)       | 211,540,008,455<br>(134,057,194,144-339,267,962,929)       |
| South Sudan | Injuries   | 42,892,776,835<br>(25,838,435,051-67,486,653,960)          | 34,831,108,068<br>(18,439,439,474-58,725,350,318)          | 34,280,170,627<br>(19,578,393,460-67,248,110,003)          | 37,957,425,065<br>(19,776,627,115-74,669,883,643)          | 49,462,201,036<br>(26,074,889,454-109,462,227)             | 83,018,466,367<br>(54,001,371,478-144,667,962,491)         |
| Tanzania    | All causes | 2,283,564,865,456<br>(2,170,330,051,325-2,395,251,682,507) | 2,608,254,084,795<br>(2,465,760,266,804-2,760,154,241,529) | 2,768,942,184,865<br>(2,582,512,213,308-2,964,778,168,382) | 2,746,291,369,121<br>(2,524,997,337,797-2,972,588,469,530) | 2,601,800,216,440<br>(2,291,847,615,789-2,951,144,819,593) | 2,487,334,286,836<br>(2,094,902,513,035-3,022,121,573,955) |
| Tanzania    | Group I    | 1,722,876,320,358<br>(1,642,382,584,811-1,812,571,520,219) | 1,992,958,917,264<br>(1,892,464,558,299-2,109,997,573,531) | 2,117,774,770,471<br>(1,993,668,449-2,264,861,190,593)     | 2,009,185,254,260<br>(1,864,190,562,615-2,159,580,148,071) | 1,734,569,991,746<br>(1,569,673,704,411-1,909,892,644,600) | 1,469,417,918,268<br>(1,271,800,971,030-1,691,267,065,097) |
| Tanzania    | NCD        | 434,107,472,475<br>(371,209,738,632-500,384,688,735)       | 487,849,700,416<br>(416,611,549,282-563,377,618,605)       | 527,120,593,042<br>(446,841,683,896-614,228,867,829)       | 598,417,676,981<br>(500,518,635,532-709,059,766,254)       | 706,070,133,108<br>(564,373,626,309-885,044,397,365)       | 836,478,035,354<br>(643,691,989,652-1,105,373,542,539)     |
| Tanzania    | Injuries   | 126,581,072,623<br>(97,639,121,964-160,510,040,936)        | 127,445,467,115<br>(100,921,557,662-156,608,817,320)       | 124,046,821,351<br>(99,000,368,743-148,675,726,141)        | 138,688,437,881<br>(112,643,099,058-169,662,399,537)       | 161,160,091,586<br>(124,611,312,637-216,455,490,554)       | 181,438,333,214<br>(134,549,822,753-255,698,051,116)       |
| Uganda      | All causes | 1,874,448,376,415<br>(1,772,328,968,814-1,986,911,680,077) | 2,203,326,494,428<br>(2,066,706,658,539-2,345,694,962,015) | 2,336,415,510,450<br>(2,204,591,774,458-2,464,467,222,020) | 2,265,477,722,433<br>(2,130,708,063,492-2,411,035,209,255) | 2,171,503,357,132<br>(1,976,319,400,731-2,371,846,102,930) | 2,057,556,494,602<br>(1,769,909,899,082-2,395,903,745,784) |
| Uganda      | Group I    | 1,458,839,420,446<br>(1,379,690,197,229-1,550,651,998,514) | 1,721,406,682,954<br>(1,615,201,036,648-1,830,599,038,984) | 1,778,269,937,029<br>(1,683,337,440,670-1,870,367,050,312) | 1,639,916,308,211<br>(1,548,131,822,394-1,739,479,661,187) | 1,480,737,250,683<br>(1,365,535,198,287-1,598,063,145,601) | 1,242,546,635,116<br>(1,099,247,604,350-1,419,611,261,261) |
| Uganda      | NCD        | 318,090,616,776<br>(264,392,370,235-371,978,858,306)       | 371,688,492,382<br>(305,675,606,218-445,523,179,086)       | 426,361,514,438<br>(355,798,066,798-500,097,258,041)       | 483,396,922,577<br>(410,670,700,822-562,779,145,552)       | 537,780,102,709<br>(438,718,974,770-641,110,781,228)       | 643,564,001,268<br>(494,988,957,021-813,673,594,178)       |
| Uganda      | Injuries   | 97,518,339,192<br>(75,070,129,834-126,016,490,396)         | 110,231,474,092<br>(85,948,828,410-139,549,008,202)        | 131,982,058,983<br>(106,925,066,235-161,556,347,519)       | 142,164,491,646<br>(115,766,708,410-174,122,129,408)       | 152,986,030,740<br>(118,115,785,805-191,627,427,560)       | 171,445,858,218<br>(122,792,989,342-233,835,635,615)       |
| Zambia      | All causes | 824,062,579,847<br>(776,273,970,445-873,029,478,882)       | 1,012,059,371,842<br>(947,671,614,629-1,084,634,782,079)   | 1,175,389,197,405<br>(1,088,921,902,837-1,265,338,614,726) | 1,148,781,647,173<br>(1,061,285,898,219-1,242,658,463,804) | 1,020,060,245,120<br>(922,907,267,473-1,117,268,213,233)   | 975,817,354,301<br>(835,922,088,983-1,140,332,568,921)     |
| Zambia      | Group I    | 633,132,885,757<br>(591,706,116,549-676,158,048,672)       | 784,922,566,630<br>(727,677,036,667-846,753,738,437)       | 912,023,988,219<br>(842,551,754,858-950,513,345,540)       | 852,482,113,202<br>(788,835,216,965-926,529,186,713)       | 690,840,946,351<br>(630,595,537,910-752,922,548,639)       | 612,845,741,547<br>(538,118,211,441-694,583,633,685)       |

Appendix Table 3. DALYs for all causes and level 1 cause groups by location for 1990 - 2015, both sexes combined.

|                                  | Cause      | 1990                                                       | 1995                                                       | 2000                                                       | 2005                                                       | 2010                                                       | 2015                                                       |
|----------------------------------|------------|------------------------------------------------------------|------------------------------------------------------------|------------------------------------------------------------|------------------------------------------------------------|------------------------------------------------------------|------------------------------------------------------------|
| Angola                           | Injuries   | 154,584,212.486<br>(76,650,670,385–237,435,219,352)        | 139,354,823.313<br>(64,890,872,253–226,525,481,230)        | 150,477,971,427<br>(74,323,036,663–233,027,222,982)        | 138,092,749,541<br>(73,978,916,328–231,497,648,107)        | 164,712,622,257<br>(93,539,295,427–285,878,992,881)        | 165,200,730,060<br>(96,135,450,251–315,866,338,172)        |
| Central African Republic         | All causes | 325,412,617.372<br>(302,134,966,748–349,510,537,813)       | 372,968,810.645<br>(329,164,320,246–418,196,835,478)       | 427,697,967,860<br>(361,436,381,881–502,643,898,855)       | 446,802,671,870<br>(366,669,819,615–541,133,069,722)       | 438,109,669,836<br>(350,721,875,572–540,155,640,370)       | 439,690,732,799<br>(339,844,812,728–506,286,361,141)       |
| Central African Republic         | Group I    | 227,944,555.531<br>(207,317,263,468–249,847,455,557)       | 266,184,687,971<br>(235,154,434,600–298,989,978,703)       | 309,811,582,983<br>(267,166,583,394–357,255,032,874)       | 321,256,699,170<br>(276,304,963,952–372,060,636,746)       | 296,640,105,154<br>(248,351,687,700–353,993,259,604)       | 281,315,908,691<br>(224,189,407,487–348,781,955,268)       |
| Central African Republic         | NCD        | 72,114,390,795<br>(60,002,054,280–86,990,642,338)          | 80,309,483,747<br>(61,133,919,674–99,707,684,828)          | 88,835,233,256<br>(62,295,733,397–116,484,999,593)         | 95,270,136,232<br>(65,725,668,887–129,944,802,955)         | 106,443,016,305<br>(72,325,755,170–144,924,774,895)        | 118,372,399,077<br>(79,679,211,783–164,713,451,341)        |
| Central African Republic         | Injuries   | 25,353,671,046<br>(16,503,087,167–33,958,866,163)          | 26,474,638,927<br>(16,335,853,502–37,058,269,545)          | 29,051,151,621<br>(15,879,395,496–44,157,775,891)          | 30,275,836,468<br>(16,475,937,720–47,344,339,863)          | 35,026,548,378<br>(19,723,599,088–54,203,333,520)          | 40,002,425,030<br>(23,245,493,348–64,412,492,595)          |
| Congo                            | All causes | 174,111,993,314<br>(156,535,698,902–194,501,716,715)       | 213,619,586,703<br>(194,999,597,598–232,192,059,684)       | 254,417,414,297<br>(233,400,563,055–276,181,147,354)       | 241,109,204,766<br>(219,974,324,277–264,784,602,158)       | 227,967,776,833<br>(201,218,397,190–260,959,305,359)       | 235,288,055,086<br>(190,784,394,420–289,081,546,697)       |
| Congo                            | Group I    | 105,514,103,583<br>(95,008,557,567–117,745,196,221)        | 134,477,479,276<br>(122,434,873,131–148,520,531,282)       | 164,448,453,228<br>(150,067,483,891–179,533,975,860)       | 156,176,314,243<br>(141,496,669,112–172,090,791,993)       | 132,858,880,157<br>(117,642,038,225–151,371,313,207)       | 130,292,173,526<br>(107,368,594,863–157,125,753,600)       |
| Congo                            | NCD        | 53,789,560,084<br>(44,657,463,495–63,975,372,323)          | 62,352,523,393<br>(52,882,844,827–72,198,021,757)          | 67,941,242,456<br>(57,017,441,889–79,986,833,138)          | 67,712,275,469<br>(56,496,224,443–79,459,624,522)          | 76,859,909,113<br>(63,132,589,225–92,489,677,838)          | 86,516,907,859<br>(65,066,470,812–113,411,123,759)         |
| Congo                            | Injuries   | 14,808,329,646<br>(10,181,105,434–19,176,960,768)          | 16,789,585,033<br>(11,475,518,281–21,475,751,971)          | 22,027,718,612<br>(15,202,930,799–28,177,192,799)          | 17,220,615,054<br>(12,357,665,924–22,096,824,891)          | 18,248,987,563<br>(13,540,814,054–23,629,322,973)          | 18,478,973,701<br>(12,956,546,044–26,154,262,689)          |
| Democratic Republic of the Congo | All causes | 3,544,914,536.202<br>(3,221,774,520,348–3,884,652,091,996) | 4,239,958,660.285<br>(3,898,200,017,324–4,601,879,860,607) | 4,673,443,135.227<br>(4,319,144,356,455–5,085,659,942,289) | 4,765,696,909.892<br>(4,391,619,378,461–5,202,673,077,969) | 4,821,460,028.508<br>(4,370,158,464,351–5,390,134,181,412) | 4,819,290,590.691<br>(4,102,712,881,663–5,721,778,281,673) |
| Democratic Republic of the Congo | Group I    | 2,696,824,194.013<br>(2,433,876,547,203–3,008,164,068,805) | 3,273,331,279.746<br>(2,971,352,198,022–3,627,491,360,862) | 3,564,189,209.238<br>(3,247,875,363,522–4,012,045,727,367) | 3,572,919,540.413<br>(3,248,344,719,021–4,019,996,882,905) | 3,457,656,742.091<br>(3,095,986,910,709–3,975,721,588,108) | 3,179,277,441.205<br>(2,649,570,203,061–3,878,228,540,418) |
| Democratic Republic of the Congo | NCD        | 633,050,452.465<br>(494,708,963,759–802,670,982,798)       | 727,691,215.622<br>(589,742,090,701–890,929,316,949)       | 825,818,994,134<br>(680,160,572,480–1,020,166,652,675)     | 916,843,144,759<br>(765,669,582,276–1,115,309,780,455)     | 1,066,324,164,479<br>(887,846,363,701–1,288,631,896,544)   | 1,290,747,405.313<br>(1,042,272,949,597–1,596,417,698,800) |
| Democratic Republic of the Congo | Injuries   | 215,039,889.724<br>(125,302,189,954–301,514,563,212)       | 238,936,164.917<br>(149,495,727,379–329,523,583,966)       | 283,434,931,855<br>(189,774,714,665–373,581,100,593)       | 275,934,224,270<br>(190,977,076,681–388,758,570,599)       | 297,479,121,938<br>(211,566,939,874–391,685,040,767)       | 349,265,744,173<br>(243,381,297,129–469,486,336,646)       |
| Equatorial Guinea                | All causes | 42,968,969.632<br>(32,934,761,056–57,747,390,538)          | 50,635,399,720<br>(39,127,389,508–64,411,833,120)          | 48,770,908,156<br>(37,966,240,697–66,884,067,354)          | 49,003,128,443<br>(38,018,743,418–70,799,061,756)          | 49,807,177,361<br>(37,996,742,078–73,886,483,273)          | 49,156,147,493<br>(36,360,456,455–79,315,931,550)          |
| Equatorial Guinea                | Group I    | 28,538,239,784<br>(23,307,701,988–35,213,918,742)          | 34,678,490,830<br>(28,530,397,150–43,238,427,312)          | 32,392,614,489<br>(26,408,184,980–41,064,206,431)          | 31,467,333,605<br>(24,861,802,704–41,054,613,604)          | 29,749,885,105<br>(22,985,846,463–39,463,542,129)          | 27,790,780,105<br>(20,890,306,112–38,951,820,984)          |
| Equatorial Guinea                | NCD        | 10,617,130,713<br>(6,278,780,663–16,653,521,974)           | 11,803,609,603<br>(6,878,078,714–18,968,444,224)           | 12,216,593,869<br>(7,504,092,649–20,597,886,869)           | 12,852,955,761<br>(8,536,891,583–22,533,898,046)           | 15,082,438,340<br>(10,304,238,781–26,557,585,031)          | 16,719,961,984<br>(11,441,918,479–30,944,021,180)          |
| Equatorial Guinea                | Injuries   | 3,813,599,135<br>(1,848,439,117–6,702,494,903)             | 4,153,299,287<br>(1,973,807,020–7,302,555,688)             | 4,161,699,797<br>(1,851,707,078–7,590,157,292)             | 4,682,839,078<br>(2,508,415,985–8,479,211,833)             | 4,974,853,916<br>(2,529,267,974–9,424,932,795)             | 4,645,405,404<br>(2,554,417,875–9,305,579,975)             |
| Gabon                            | All causes | 61,471,058,923<br>(56,341,211,089–66,816,954,161)          | 65,916,194,195<br>(60,284,899,069–72,601,801,694)          | 73,323,575,437<br>(66,931,732,692–80,755,900,067)          | 78,071,605,462<br>(70,142,905,231–86,909,433,016)          | 77,464,988,316<br>(67,949,579,757–87,941,183,703)          | 73,919,171,969<br>(61,213,378,485–91,715,358,480)          |
| Gabon                            | Group I    | 33,038,793,737<br>(30,244,335,862–36,056,847,755)          | 35,223,059,154<br>(32,241,086,148–38,809,052,937)          | 41,235,549,687<br>(37,228,688,618–45,341,825,047)          | 43,148,210,004<br>(38,865,311,275–48,507,141,581)          | 41,597,290,260<br>(36,612,894,815–47,768,204,715)          | 35,103,880,519<br>(29,583,796,326–43,703,991,816)          |
| Gabon                            | NCD        | 22,531,255,342<br>(19,265,250,939–25,903,011,603)          | 24,576,278,027<br>(21,078,865,151–28,359,203,143)          | 26,255,151,493<br>(22,470,207,185–30,754,979,607)          | 28,005,014,097<br>(24,365,190,902–33,675,615,263)          | 29,422,935,771<br>(24,272,796,080–35,207,180,906)          | 32,051,043,471<br>(25,270,857,971–41,752,484,652)          |
| Gabon                            | Injuries   | 5,901,009,844<br>(4,365,754,292–7,397,203,208)             | 6,116,857,014<br>(4,622,571,407–7,592,824,872)             | 5,832,874,257<br>(4,348,552,562–7,349,677,870)             | 6,318,381,361<br>(4,663,092,373–8,180,344,324)             | 6,444,762,285<br>(4,777,536,759–8,454,151,699)             | 6,764,247,979<br>(4,764,579,666–9,947,251,627)             |

**Appendix Table 4. Rate of DALYs per 100,000 individuals for all causes and level 1 cause groups by location for 1990 - 2015, both sexes combined.**

|                 | Cause      | 1990                               | 1995                               | 2000                               | 2005                               | 2010                               | 2015                               |
|-----------------|------------|------------------------------------|------------------------------------|------------------------------------|------------------------------------|------------------------------------|------------------------------------|
| Global          | All causes | 48,958.47<br>(45,948.54–52,395.93) | 47,212.22<br>(44,247.86–50,575.37) | 44,856.96<br>(41,966.63–48,185.67) | 41,561.74<br>(38,640.76–44,850.35) | 37,612.12<br>(34,692.75–40,764.31) | 34,445.68<br>(31,602.96–37,654.29) |
| Global          | Group I    | 18,397.88<br>(17,715.28–19,226.38) | 17,219.71<br>(16,601.34–17,948.21) | 16,082.74<br>(15,484.14–16,783.65) | 14,297.57<br>(13,765.97–14,955.05) | 11,987.74<br>(11,466.12–12,650.55) | 10,007.15<br>(9,498.53–10,629.30)  |
| Global          | NCD        | 25,571.25<br>(23,182.26–28,087.07) | 25,212.88<br>(22,831.02–27,714.72) | 24,352.48<br>(22,058.76–26,822.08) | 23,220.17<br>(20,898.51–25,688.98) | 21,882.64<br>(19,551.17–24,368.09) | 21,062.39<br>(18,790.57–23,517.95) |
| Global          | Injuries   | 4,989.34<br>(4,625.08–5,315.26)    | 4,779.63<br>(4,412.45–5,087.28)    | 4,421.74<br>(4,122.20–4,701.10)    | 4,044.00<br>(3,764.84–4,300.14)    | 3,741.74<br>(3,445.21–4,019.38)    | 3,376.14<br>(3,120.78–3,607.03)    |
| High SDI        | All causes | 27,957.58<br>(25,183.44–31,083.15) | 28,101.42<br>(25,348.34–31,237.54) | 26,324.02<br>(23,599.59–29,476.90) | 24,959.87<br>(22,270.01–28,063.31) | 22,730.38<br>(20,044.00–25,789.82) | 21,705.38<br>(19,004.98–24,704.80) |
| High SDI        | Group I    | 2,635.56<br>(2,386.19–2,951.33)    | 2,503.06<br>(2,256.12–2,801.00)    | 2,224.42<br>(1,978.21–2,526.64)    | 2,053.52<br>(1,807.18–2,362.38)    | 1,844.89<br>(1,605.10–2,162.67)    | 1,704.93<br>(1,468.45–2,017.59)    |
| High SDI        | NCD        | 21,651.59<br>(19,414.49–24,206.97) | 21,684.03<br>(19,441.01–24,204.06) | 20,571.65<br>(18,321.91–23,089.78) | 19,620.95<br>(17,381.03–22,141.26) | 18,221.77<br>(15,963.30–20,745.10) | 17,596.63<br>(15,309.61–20,123.63) |
| High SDI        | Injuries   | 3,670.44<br>(3,425.99–3,957.98)    | 3,914.34<br>(3,664.62–4,205.28)    | 3,527.95<br>(3,305.29–3,790.33)    | 3,285.40<br>(3,067.40–3,544.03)    | 2,663.73<br>(2,474.13–2,905.55)    | 2,403.82<br>(2,214.41–2,637.65)    |
| High-middle SDI | All causes | 39,622.37<br>(36,694.42–42,916.65) | 37,830.41<br>(34,885.30–40,977.48) | 35,501.18<br>(32,594.34–38,689.56) | 33,099.32<br>(30,241.31–36,301.92) | 29,841.62<br>(27,067.38–32,958.69) | 27,124.81<br>(24,387.39–30,263.03) |
| High-middle SDI | Group I    | 8,540.64<br>(8,077.22–9,113.87)    | 7,468.67<br>(7,027.32–7,961.44)    | 6,771.30<br>(6,364.06–7,242.28)    | 6,190.89<br>(5,823.09–6,661.13)    | 5,277.70<br>(4,884.38–5,750.04)    | 4,186.79<br>(3,818.07–4,628.76)    |
| High-middle SDI | NCD        | 26,071.11<br>(23,646.93–28,710.26) | 25,662.92<br>(23,288.81–28,228.72) | 24,559.99<br>(22,220.90–27,186.97) | 23,193.41<br>(20,857.57–25,769.17) | 21,332.06<br>(18,971.11–23,884.84) | 20,083.63<br>(17,790.25–22,695.09) |
| High-middle SDI | Injuries   | 5,010.62<br>(4,689.06–5,332.62)    | 4,698.81<br>(4,435.10–4,948.43)    | 4,169.89<br>(3,962.53–4,390.44)    | 3,715.02<br>(3,518.74–3,925.23)    | 3,231.86<br>(3,048.50–3,428.78)    | 2,854.39<br>(2,659.29–3,059.78)    |
| Middle SDI      | All causes | 46,827.82<br>(43,979.65–50,256.44) | 43,258.81<br>(40,456.16–46,406.49) | 40,272.80<br>(37,567.76–43,341.26) | 36,957.85<br>(34,144.31–40,064.04) | 33,511.56<br>(30,806.37–36,575.05) | 30,874.37<br>(28,200.51–33,866.72) |
| Middle SDI      | Group I    | 14,974.99<br>(14,284.44–15,834.48) | 12,818.22<br>(12,193.23–13,546.91) | 11,107.16<br>(10,528.41–11,773.94) | 9,257.15<br>(8,758.60–9,836.22)    | 7,631.97<br>(7,188.85–8,158.90)    | 6,233.12<br>(5,797.57–6,737.71)    |
| Middle SDI      | NCD        | 26,908.22<br>(24,627.55–29,400.29) | 25,870.16<br>(23,611.13–28,261.28) | 25,008.27<br>(22,870.20–27,420.77) | 23,901.18<br>(21,683.84–26,278.63) | 22,467.87<br>(20,248.25–24,888.65) | 21,338.09<br>(19,148.43–23,708.30) |
| Middle SDI      | Injuries   | 4,944.61<br>(4,453.44–5,256.03)    | 4,570.43<br>(4,103.18–4,856.13)    | 4,157.37<br>(3,843.50–4,385.84)    | 3,799.52<br>(3,488.14–4,008.88)    | 3,411.73<br>(3,106.11–3,604.51)    | 3,303.16<br>(2,994.54–3,554.12)    |
| Low-middle SDI  | All causes | 69,139.20<br>(65,350.73–73,307.87) | 65,402.84<br>(61,777.34–69,538.70) | 61,945.99<br>(58,272.50–65,854.76) | 57,484.98<br>(53,863.94–61,324.50) | 52,412.99<br>(48,867.65–56,230.56) | 47,133.14<br>(43,570.42–50,921.64) |
| Low-middle SDI  | Group I    | 34,925.53<br>(33,529.17–36,358.85) | 31,530.48<br>(30,315.23–32,821.49) | 28,737.16<br>(27,622.99–29,939.67) | 25,574.35<br>(24,590.89–26,759.02) | 21,044.46<br>(20,128.66–22,108.22) | 17,326.54<br>(16,416.80–18,305.07) |
| Low-middle SDI  | NCD        | 28,787.47<br>(26,151.35–31,500.56) | 28,634.93<br>(26,008.74–31,342.03) | 28,290.46<br>(25,538.02–31,005.19) | 27,137.78<br>(24,468.85–29,793.10) | 26,400.95<br>(23,752.53–29,111.84) | 25,768.22<br>(23,188.43–28,376.76) |
| Low-middle SDI  | Injuries   | 5,426.20<br>(4,883.59–5,924.46)    | 5,237.43<br>(4,632.35–5,697.73)    | 4,918.36<br>(4,358.59–5,326.55)    | 4,772.86<br>(4,267.50–5,149.77)    | 4,967.58<br>(4,211.72–5,736.49)    | 4,038.38<br>(3,602.49–4,361.62)    |
| Low SDI         | All causes | 89,500.11<br>(84,568.99–94,716.50) | 87,413.32<br>(82,649.56–92,180.91) | 84,276.53<br>(79,469.38–88,829.28) | 74,510.31<br>(70,113.54–79,271.48) | 65,000.52<br>(60,450.43–70,262.28) | 59,078.97<br>(54,082.79–65,004.61) |
| Low SDI         | Group I    | 52,324.48<br>(49,847.36–54,949.36) | 52,147.68<br>(49,838.32–54,779.05) | 49,245.41<br>(47,052.31–51,765.61) | 42,311.49<br>(40,290.30–44,686.10) | 33,903.09<br>(32,069.53–36,199.13) | 27,634.39<br>(25,747.13–30,036.33) |
| Low SDI         | NCD        | 29,374.54<br>(26,432.05–32,317.42) | 28,795.98<br>(26,009.31–31,797.04) | 28,099.88<br>(25,196.98–30,863.02) | 26,881.48<br>(24,111.24–29,816.73) | 26,075.30<br>(23,226.33–29,137.95) | 26,185.24<br>(23,224.28–29,634.97) |
| Low SDI         | Injuries   | 7,801.08<br>(6,709.55–8,812.98)    | 6,469.66<br>(5,719.49–7,113.01)    | 6,931.23<br>(6,070.53–7,782.92)    | 5,317.34<br>(4,789.67–5,806.18)    | 5,022.13<br>(4,509.75–5,526.27)    | 5,259.34<br>(4,655.06–5,947.30)    |
| High-income     | All causes | 25,643.18<br>(22,934.38–28,723.60) | 24,392.50<br>(21,702.83–27,482.82) | 22,864.57<br>(20,206.24–25,945.11) | 21,572.56<br>(18,921.61–24,626.73) | 20,426.78<br>(17,794.13–23,459.95) | 19,926.25<br>(17,286.66–22,927.83) |
| High-income     | Group I    | 2,317.14<br>(2,095.78–2,600.93)    | 2,222.69<br>(2,007.41–2,500.61)    | 1,894.68<br>(1,677.66–2,175.75)    | 1,750.61<br>(1,532.68–2,038.08)    | 1,608.61<br>(1,389.20–1,899.49)    | 1,491.16<br>(1,274.63–1,778.40)    |
| High-income     | NCD        | 20,201.74<br>(17,975.69–22,739.06) | 19,249.90<br>(17,014.55–21,786.41) | 18,334.82<br>(16,098.90–20,872.27) | 17,396.93<br>(15,153.30–19,927.30) | 16,676.50<br>(14,425.65–19,204.89) | 16,424.74<br>(14,163.87–18,961.97) |



**Appendix Table 4. Rate of DALYs per 100,000 individuals for all causes and level 1 cause groups by location for 1990 - 2015, both sexes combined.**

|                           | Cause      | 1990                               | 1995                               | 2000                               | 2005                               | 2010                               | 2015                               |
|---------------------------|------------|------------------------------------|------------------------------------|------------------------------------|------------------------------------|------------------------------------|------------------------------------|
| High-income               | Injuries   | 3,124.30<br>(2,880.23–3,415.63)    | 2,919.90<br>(2,683.12–3,206.55)    | 2,635.07<br>(2,416.81–2,903.05)    | 2,425.01<br>(2,216.35–2,682.19)    | 2,141.67<br>(1,953.86–2,385.47)    | 2,010.35<br>(1,829.97–2,248.58)    |
| High-income North America | All causes | 27,265.84<br>(24,496.72–30,434.94) | 26,478.67<br>(23,718.97–29,619.04) | 24,973.88<br>(22,194.31–28,119.09) | 24,258.79<br>(21,492.51–27,406.91) | 23,019.49<br>(20,198.69–26,155.24) | 22,687.32<br>(19,818.20–25,843.09) |
| High-income North America | Group I    | 2,466.49<br>(2,258.80–2,716.38)    | 2,509.32<br>(2,305.42–2,772.38)    | 2,010.13<br>(1,795.15–2,291.44)    | 1,905.61<br>(1,683.29–2,195.31)    | 1,714.70<br>(1,492.57–2,006.67)    | 1,595.90<br>(1,375.99–1,885.19)    |
| High-income North America | NCD        | 21,474.84<br>(19,083.61–24,205.29) | 20,890.11<br>(18,491.11–23,581.68) | 20,173.39<br>(17,770.38–22,889.25) | 19,542.12<br>(17,119.62–22,260.32) | 18,854.30<br>(16,406.88–21,604.91) | 18,744.08<br>(16,253.09–21,475.23) |
| High-income North America | Injuries   | 3,324.51<br>(3,124.62–3,566.56)    | 3,079.24<br>(2,883.02–3,314.77)    | 2,790.36<br>(2,604.27–3,019.45)    | 2,811.05<br>(2,613.34–3,047.75)    | 2,450.49<br>(2,275.75–2,673.99)    | 2,347.34<br>(2,167.59–2,573.02)    |
| Canada                    | All causes | 23,881.69<br>(21,099.59–26,997.16) | 23,026.31<br>(20,289.04–26,144.40) | 21,624.66<br>(18,896.38–24,727.05) | 20,544.51<br>(17,826.66–23,657.80) | 19,478.20<br>(16,768.79–22,529.29) | 19,119.17<br>(16,377.64–22,104.36) |
| Canada                    | Group I    | 1,872.45<br>(1,623.46–2,205.26)    | 1,895.58<br>(1,652.22–2,227.12)    | 1,627.91<br>(1,388.18–1,963.45)    | 1,557.14<br>(1,320.69–1,877.51)    | 1,536.19<br>(1,288.85–1,879.83)    | 1,462.12<br>(1,200.97–1,796.21)    |
| Canada                    | NCD        | 19,277.49<br>(16,949.07–21,876.17) | 18,671.88<br>(16,346.16–21,258.69) | 17,814.83<br>(15,502.24–20,437.74) | 16,961.00<br>(14,627.90–19,592.25) | 16,125.15<br>(13,809.15–18,691.13) | 15,946.01<br>(13,590.63–18,482.90) |
| Canada                    | Injuries   | 2,731.76<br>(2,535.64–2,975.11)    | 2,458.85<br>(2,270.23–2,689.77)    | 2,181.91<br>(2,005.83–2,396.77)    | 2,026.37<br>(1,852.96–2,234.30)    | 1,816.87<br>(1,655.24–2,018.38)    | 1,711.03<br>(1,551.78–1,909.47)    |
| Greenland                 | All causes | 48,245.76<br>(44,978.35–51,818.04) | 43,669.58<br>(40,535.60–46,958.89) | 40,896.13<br>(37,692.79–44,377.68) | 38,141.69<br>(34,910.32–41,465.87) | 34,702.55<br>(31,736.05–37,890.51) | 32,339.98<br>(29,274.11–35,707.68) |
| Greenland                 | Group I    | 6,040.67<br>(5,435.75–6,641.11)    | 5,193.01<br>(4,630.11–5,760.19)    | 4,252.00<br>(3,761.53–4,749.60)    | 3,851.91<br>(3,395.59–4,308.28)    | 3,484.14<br>(3,056.90–3,944.66)    | 3,120.68<br>(2,695.40–3,537.24)    |
| Greenland                 | NCD        | 31,952.52<br>(29,235.57–34,818.96) | 29,601.30<br>(26,995.29–32,245.71) | 28,504.67<br>(25,932.83–31,348.98) | 26,871.85<br>(24,237.47–29,571.13) | 24,703.70<br>(22,149.95–27,337.68) | 23,386.09<br>(20,778.32–26,051.15) |
| Greenland                 | Injuries   | 10,252.57<br>(9,576.87–10,882.02)  | 8,875.26<br>(8,374.57–9,401.57)    | 8,139.47<br>(7,627.20–8,667.91)    | 7,417.94<br>(6,979.56–7,857.04)    | 6,514.71<br>(6,088.62–6,946.04)    | 5,833.20<br>(5,287.52–6,386.43)    |
| United States             | All causes | 27,635.59<br>(24,868.46–30,802.34) | 26,861.36<br>(24,097.76–30,002.67) | 25,341.50<br>(22,543.46–28,484.06) | 24,671.76<br>(21,896.62–27,819.61) | 23,425.25<br>(20,584.07–26,566.63) | 23,103.97<br>(20,223.79–26,282.15) |
| United States             | Group I    | 2,527.96<br>(2,322.32–2,768.54)    | 2,574.90<br>(2,374.86–2,828.71)    | 2,047.72<br>(1,835.29–2,322.90)    | 1,940.37<br>(1,718.75–2,223.36)    | 1,733.48<br>(1,514.00–2,018.24)    | 1,611.03<br>(1,395.20–1,896.64)    |
| United States             | NCD        | 21,717.89<br>(19,314.60–24,451.85) | 21,139.96<br>(18,735.74–23,842.78) | 20,439.21<br>(18,029.40–23,162.71) | 19,836.80<br>(17,396.41–22,566.91) | 19,171.70<br>(16,700.97–21,937.60) | 19,073.99<br>(16,561.73–21,827.43) |
| United States             | Injuries   | 3,389.73<br>(3,189.84–3,629.31)    | 3,146.50<br>(2,949.09–3,381.88)    | 2,854.57<br>(2,666.93–3,084.95)    | 2,894.59<br>(2,692.34–3,138.56)    | 2,520.08<br>(2,344.09–2,745.11)    | 2,418.95<br>(2,237.12–2,648.47)    |
| Australasia               | All causes | 25,054.95<br>(22,236.05–28,193.02) | 23,270.97<br>(20,484.68–26,413.11) | 21,820.42<br>(19,002.03–25,011.12) | 20,277.31<br>(17,502.01–23,392.31) | 19,328.86<br>(16,556.77–22,414.21) | 18,875.86<br>(16,062.93–21,914.56) |
| Australasia               | Group I    | 1,666.44<br>(1,457.45–1,954.05)    | 1,510.45<br>(1,300.94–1,786.53)    | 1,414.90<br>(1,200.22–1,688.14)    | 1,355.78<br>(1,141.45–1,634.61)    | 1,273.30<br>(1,058.91–1,561.68)    | 1,167.23<br>(946.41–1,461.72)      |
| Australasia               | NCD        | 20,646.06<br>(18,218.44–23,419.87) | 19,379.00<br>(16,949.12–22,171.65) | 18,210.65<br>(15,790.42–21,013.54) | 17,028.28<br>(14,615.52–19,785.80) | 16,370.77<br>(13,947.24–19,088.52) | 16,131.90<br>(13,704.33–18,825.55) |
| Australasia               | Injuries   | 2,742.45<br>(2,551.67–2,962.50)    | 2,381.51<br>(2,202.21–2,592.90)    | 2,194.87<br>(2,027.84–2,395.19)    | 1,893.26<br>(1,733.71–2,087.15)    | 1,684.79<br>(1,539.78–1,871.20)    | 1,576.74<br>(1,433.45–1,759.22)    |
| Australia                 | All causes | 24,760.74<br>(21,935.71–27,910.26) | 23,016.27<br>(20,224.48–26,173.98) | 21,611.64<br>(18,797.54–24,822.86) | 20,069.63<br>(17,299.95–23,199.61) | 19,148.17<br>(16,382.02–22,229.71) | 18,757.79<br>(15,970.63–21,786.45) |
| Australia                 | Group I    | 1,660.79<br>(1,439.49–1,949.76)    | 1,516.51<br>(1,299.69–1,802.81)    | 1,434.44<br>(1,209.03–1,711.69)    | 1,379.29<br>(1,156.75–1,667.85)    | 1,286.20<br>(1,065.41–1,585.90)    | 1,176.68<br>(949.70–1,470.10)      |
| Australia                 | NCD        | 20,453.63<br>(18,007.86–23,238.99) | 19,201.13<br>(16,772.30–21,991.71) | 18,033.40<br>(15,615.55–20,840.18) | 16,858.98<br>(14,450.05–19,622.63) | 16,236.24<br>(13,814.22–18,962.20) | 16,045.03<br>(13,623.95–18,737.56) |
| Australia                 | Injuries   | 2,646.31<br>(2,457.20–2,865.62)    | 2,298.63<br>(2,121.35–2,510.77)    | 2,143.80<br>(1,971.96–2,345.86)    | 1,831.36<br>(1,671.29–2,022.77)    | 1,625.73<br>(1,482.58–1,808.66)    | 1,536.07<br>(1,394.44–1,717.98)    |
| New Zealand               | All causes | 26,525.46<br>(23,804.12–29,623.48) | 24,527.52<br>(21,785.31–27,656.95) | 22,878.58<br>(20,126.42–25,970.46) | 21,326.73<br>(18,532.20–24,405.28) | 20,248.64<br>(17,507.88–23,315.47) | 19,473.55<br>(16,655.11–22,513.29) |
| New Zealand               | Group I    | 1,698.85<br>(1,504.59–1,943.39)    | 1,481.60<br>(1,288.04–1,727.87)    | 1,318.81<br>(1,118.88–1,577.31)    | 1,241.74<br>(1,038.56–1,510.56)    | 1,208.83<br>(1,004.74–1,469.46)    | 1,119.56<br>(916.21–1,378.72)      |

**Appendix Table 4. Rate of DALYs per 100,000 individuals for all causes and level 1 cause groups by location for 1990 - 2015, both sexes combined.**

|                          | Cause      | 1990                               | 1995                               | 2000                               | 2005                               | 2010                               | 2015                               |
|--------------------------|------------|------------------------------------|------------------------------------|------------------------------------|------------------------------------|------------------------------------|------------------------------------|
| New Zealand              | NCD        | 21,612.51<br>(19,208.49–24,318.89) | 20,265.81<br>(17,826.35–23,029.32) | 19,117.77<br>(16,693.05–21,906.54) | 17,899.55<br>(15,461.69–20,593.35) | 17,058.67<br>(14,639.01–19,737.58) | 16,565.55<br>(14,046.82–19,269.67) |
| New Zealand              | Injuries   | 3,214.10<br>(3,010.54–3,445.01)    | 2,780.10<br>(2,594.57–3,000.60)    | 2,442.01<br>(2,270.37–2,649.07)    | 2,185.44<br>(2,024.34–2,384.15)    | 1,981.14<br>(1,827.60–2,172.47)    | 1,788.43<br>(1,631.05–1,976.70)    |
| High-income Asia Pacific | All causes | 22,303.30<br>(19,924.56–25,032.79) | 21,117.69<br>(18,772.83–23,858.08) | 19,366.55<br>(17,023.98–22,053.15) | 17,978.70<br>(15,662.51–20,601.21) | 16,970.22<br>(14,680.43–19,557.91) | 16,493.98<br>(14,226.18–19,038.78) |
| High-income Asia Pacific | Group I    | 2,076.23<br>(1,819.86–2,383.31)    | 1,873.10<br>(1,638.69–2,173.23)    | 1,710.58<br>(1,477.34–2,002.61)    | 1,513.69<br>(1,285.71–1,813.16)    | 1,408.02<br>(1,180.52–1,720.16)    | 1,336.06<br>(1,110.58–1,643.68)    |
| High-income Asia Pacific | NCD        | 17,373.91<br>(15,408.34–19,618.54) | 16,241.43<br>(14,279.68–18,453.68) | 15,095.26<br>(13,144.75–17,293.49) | 14,169.66<br>(12,230.09–16,334.03) | 13,471.58<br>(11,541.71–15,604.46) | 13,229.78<br>(11,306.99–15,378.18) |
| High-income Asia Pacific | Injuries   | 2,853.16<br>(2,639.36–3,096.09)    | 3,003.16<br>(2,670.92–3,394.50)    | 2,560.70<br>(2,370.70–2,791.69)    | 2,295.35<br>(2,121.77–2,516.45)    | 2,090.62<br>(1,934.99–2,296.27)    | 1,928.14<br>(1,774.51–2,126.80)    |
| Brunei                   | All causes | 27,903.53<br>(25,344.58–30,890.70) | 26,659.04<br>(24,142.29–29,577.13) | 24,762.55<br>(22,199.87–27,595.87) | 23,425.78<br>(20,898.27–26,245.60) | 22,884.66<br>(20,383.50–25,703.48) | 22,738.97<br>(20,142.98–25,575.74) |
| Brunei                   | Group I    | 2,510.35<br>(2,225.38–2,879.37)    | 2,321.25<br>(2,045.84–2,668.02)    | 2,169.68<br>(1,906.53–2,501.89)    | 2,100.78<br>(1,852.51–2,437.21)    | 2,046.74<br>(1,797.26–2,391.17)    | 2,054.05<br>(1,784.60–2,399.16)    |
| Brunei                   | NCD        | 21,905.90<br>(19,807.40–24,340.04) | 21,165.83<br>(19,082.52–23,545.60) | 19,870.10<br>(17,782.24–22,219.90) | 18,923.76<br>(16,773.57–21,241.27) | 18,573.54<br>(16,484.04–20,848.80) | 18,496.87<br>(16,351.54–20,850.85) |
| Brunei                   | Injuries   | 3,487.28<br>(3,111.92–3,850.71)    | 3,171.96<br>(2,883.76–3,510.24)    | 2,722.77<br>(2,462.39–3,005.28)    | 2,401.25<br>(2,145.01–2,691.90)    | 2,264.38<br>(2,019.06–2,545.84)    | 2,188.04<br>(1,929.18–2,493.21)    |
| Japan                    | All causes | 19,964.98<br>(17,616.43–22,605.75) | 19,434.73<br>(17,099.60–22,153.89) | 18,111.62<br>(15,785.97–20,712.48) | 17,202.01<br>(14,929.50–19,769.87) | 16,416.20<br>(14,142.53–18,936.98) | 16,011.68<br>(13,740.44–18,526.17) |
| Japan                    | Group I    | 1,734.92<br>(1,523.63–2,003.96)    | 1,701.04<br>(1,486.39–1,973.20)    | 1,562.76<br>(1,344.29–1,841.52)    | 1,416.27<br>(1,201.87–1,702.51)    | 1,329.10<br>(1,116.79–1,620.14)    | 1,277.90<br>(1,067.63–1,568.87)    |
| Japan                    | NCD        | 15,999.66<br>(14,017.96–18,212.15) | 15,234.63<br>(13,288.15–17,421.88) | 14,364.27<br>(12,420.55–16,540.42) | 13,721.37<br>(11,786.99–15,879.06) | 13,192.14<br>(11,264.56–15,333.21) | 12,970.73<br>(11,040.05–15,111.70) |
| Japan                    | Injuries   | 2,230.40<br>(2,057.84–2,435.38)    | 2,499.06<br>(2,127.27–3,017.75)    | 2,184.59<br>(2,012.77–2,397.10)    | 2,064.37<br>(1,906.97–2,263.89)    | 1,894.96<br>(1,751.27–2,080.79)    | 1,763.05<br>(1,622.36–1,950.43)    |
| Singapore                | All causes | 24,659.14<br>(22,367.34–27,219.73) | 22,314.16<br>(20,038.58–24,899.26) | 19,720.43<br>(17,531.43–22,281.77) | 17,568.43<br>(15,413.95–20,036.45) | 16,197.92<br>(14,066.91–18,566.60) | 15,586.12<br>(13,463.44–18,010.44) |
| Singapore                | Group I    | 2,865.31<br>(2,601.15–3,187.77)    | 2,491.94<br>(2,245.74–2,821.06)    | 2,239.94<br>(1,994.68–2,559.67)    | 1,985.46<br>(1,757.23–2,308.41)    | 1,871.44<br>(1,645.62–2,179.21)    | 1,814.70<br>(1,578.08–2,120.91)    |
| Singapore                | NCD        | 19,529.60<br>(17,667.65–21,630.13) | 17,897.31<br>(16,023.51–19,994.20) | 15,831.75<br>(14,014.21–17,921.32) | 14,156.29<br>(12,355.97–16,195.67) | 13,147.28<br>(11,296.73–15,174.51) | 12,682.24<br>(10,809.03–14,745.91) |
| Singapore                | Injuries   | 2,264.23<br>(2,049.17–2,523.05)    | 1,924.92<br>(1,714.99–2,176.63)    | 1,648.74<br>(1,465.18–1,867.41)    | 1,426.68<br>(1,262.13–1,632.07)    | 1,179.20<br>(1,032.53–1,370.49)    | 1,089.18<br>(946.26–1,281.35)      |
| South Korea              | All causes | 31,341.09<br>(28,689.19–34,209.57) | 27,546.27<br>(25,075.08–30,390.37) | 24,022.68<br>(21,504.20–26,889.08) | 20,720.09<br>(18,290.59–23,532.15) | 18,779.99<br>(16,366.13–21,503.27) | 18,035.86<br>(15,673.09–20,742.95) |
| South Korea              | Group I    | 2,859.01<br>(2,481.98–3,344.16)    | 2,150.67<br>(1,847.64–2,532.95)    | 1,938.11<br>(1,681.45–2,267.25)    | 1,638.04<br>(1,385.30–1,970.76)    | 1,498.83<br>(1,242.99–1,846.89)    | 1,384.19<br>(1,128.96–1,727.71)    |
| South Korea              | NCD        | 23,851.04<br>(21,796.45–26,222.48) | 20,962.78<br>(18,913.13–23,244.54) | 18,466.19<br>(16,434.51–20,765.27) | 16,072.81<br>(14,058.28–18,268.92) | 14,595.25<br>(12,594.30–16,834.89) | 14,220.54<br>(12,258.00–16,421.79) |
| South Korea              | Injuries   | 4,631.05<br>(4,289.40–5,021.56)    | 4,432.82<br>(4,109.06–4,809.94)    | 3,618.38<br>(3,356.55–3,956.53)    | 3,009.24<br>(2,770.51–3,290.21)    | 2,685.92<br>(2,495.63–2,927.69)    | 2,431.14<br>(2,226.89–2,679.88)    |
| Western Europe           | All causes | 25,113.38<br>(22,348.49–28,276.36) | 23,649.80<br>(20,879.59–26,794.87) | 22,205.02<br>(19,463.56–25,347.70) | 20,526.53<br>(17,804.11–23,655.48) | 19,296.29<br>(16,630.72–22,379.01) | 18,658.36<br>(16,022.00–21,724.06) |
| Western Europe           | Group I    | 1,902.97<br>(1,689.97–2,176.90)    | 1,817.01<br>(1,609.04–2,093.75)    | 1,553.50<br>(1,343.51–1,829.20)    | 1,415.70<br>(1,208.10–1,695.08)    | 1,317.98<br>(1,114.31–1,598.22)    | 1,216.69<br>(1,008.10–1,501.41)    |
| Western Europe           | NCD        | 20,182.45<br>(17,916.64–22,730.33) | 19,141.80<br>(16,850.35–21,695.66) | 18,207.98<br>(15,938.67–20,748.97) | 17,028.60<br>(14,758.73–19,569.56) | 16,192.73<br>(13,937.19–18,729.06) | 15,800.70<br>(13,501.69–18,310.31) |
| Western Europe           | Injuries   | 3,027.95<br>(2,734.71–3,381.84)    | 2,690.99<br>(2,410.52–3,025.66)    | 2,443.53<br>(2,181.28–2,759.22)    | 2,082.24<br>(1,841.57–2,383.84)    | 1,785.59<br>(1,565.68–2,068.46)    | 1,640.96<br>(1,438.30–1,907.56)    |
| Andorra                  | All causes | 18,874.05<br>(16,126.30–22,039.54) | 17,926.76<br>(15,218.99–20,946.52) | 16,992.29<br>(14,305.17–19,998.76) | 16,425.69<br>(13,734.88–19,475.41) | 15,944.57<br>(13,329.97–18,996.00) | 15,909.17<br>(13,238.86–18,983.72) |

**Appendix Table 4. Rate of DALYs per 100,000 individuals for all causes and level 1 cause groups by location for 1990 - 2015, both sexes combined.**

|         | Cause      | 1990                               | 1995                               | 2000                               | 2005                               | 2010                               | 2015                               |
|---------|------------|------------------------------------|------------------------------------|------------------------------------|------------------------------------|------------------------------------|------------------------------------|
| Andorra | Group I    | 1,539.34<br>(1,134.45-3,143.06)    | 1,483.05<br>(1,005.85-3,437.24)    | 1,227.63<br>(880.99-2,412.06)      | 1,145.78<br>(838.15-1,899.82)      | 1,064.86<br>(778.26-1,668.58)      | 1,021.34<br>(750.95-1,543.61)      |
| Andorra | NCD        | 15,210.96<br>(12,851.65-17,837.24) | 14,551.21<br>(12,180.14-17,167.05) | 14,012.38<br>(11,727.77-16,576.08) | 13,656.23<br>(11,372.61-16,145.55) | 13,419.07<br>(11,171.60-15,975.03) | 13,480.48<br>(11,201.47-16,090.86) |
| Andorra | Injuries   | 2,123.75<br>(1,683.51-2,512.03)    | 1,892.49<br>(1,420.40-2,269.92)    | 1,752.27<br>(1,401.83-2,101.33)    | 1,623.69<br>(1,341.45-1,955.32)    | 1,460.64<br>(1,191.70-1,777.20)    | 1,407.35<br>(1,156.60-1,717.42)    |
| Austria | All causes | 25,940.12<br>(23,159.52-29,113.47) | 24,336.23<br>(21,597.05-27,502.05) | 22,762.17<br>(20,036.91-25,936.14) | 20,993.72<br>(18,234.71-24,143.99) | 19,850.64<br>(17,126.73-22,941.32) | 18,960.64<br>(16,235.07-22,035.63) |
| Austria | Group I    | 1,670.35<br>(1,455.17-1,956.20)    | 1,444.11<br>(1,227.86-1,737.67)    | 1,268.24<br>(1,053.01-1,532.88)    | 1,227.60<br>(1,020.42-1,483.20)    | 1,146.82<br>(933.68-1,419.56)      | 1,025.23<br>(814.92-1,300.77)      |
| Austria | NCD        | 20,719.11<br>(18,412.07-23,297.19) | 19,788.96<br>(17,459.24-22,394.84) | 18,749.20<br>(16,439.07-21,319.62) | 17,398.66<br>(15,089.64-19,918.42) | 16,651.93<br>(14,347.74-19,247.25) | 16,108.95<br>(13,792.78-18,651.14) |
| Austria | Injuries   | 3,550.66<br>(3,214.00-3,926.32)    | 3,103.17<br>(2,800.66-3,457.85)    | 2,744.73<br>(2,456.77-3,084.57)    | 2,367.47<br>(2,101.89-2,701.21)    | 2,051.90<br>(1,803.39-2,358.41)    | 1,826.45<br>(1,601.10-2,116.53)    |
| Belgium | All causes | 25,499.75<br>(22,742.84-28,637.22) | 24,354.24<br>(21,624.95-27,494.15) | 23,311.51<br>(20,557.55-26,435.99) | 21,423.15<br>(18,747.44-24,504.72) | 20,316.42<br>(17,601.27-23,364.14) | 19,746.88<br>(16,941.27-22,775.51) |
| Belgium | Group I    | 1,671.68<br>(1,490.25-1,911.40)    | 1,567.21<br>(1,391.77-1,800.45)    | 1,489.19<br>(1,315.93-1,717.34)    | 1,378.72<br>(1,208.88-1,603.68)    | 1,293.70<br>(1,123.59-1,533.35)    | 1,184.33<br>(1,005.35-1,409.20)    |
| Belgium | NCD        | 20,404.81<br>(18,065.43-23,023.77) | 19,539.00<br>(17,215.99-22,147.01) | 18,679.41<br>(16,405.48-21,261.64) | 17,355.89<br>(15,039.76-19,946.51) | 16,607.14<br>(14,320.96-19,190.55) | 16,303.83<br>(13,921.77-18,914.67) |
| Belgium | Injuries   | 3,423.26<br>(3,123.58-3,785.13)    | 3,248.03<br>(2,967.17-3,592.75)    | 3,142.91<br>(2,852.57-3,487.69)    | 2,688.54<br>(2,416.35-3,026.60)    | 2,415.59<br>(2,162.96-2,730.54)    | 2,258.73<br>(2,004.47-2,560.96)    |
| Cyprus  | All causes | 25,074.89<br>(22,314.57-28,220.89) | 24,477.10<br>(21,714.22-27,629.90) | 22,914.45<br>(20,177.52-26,056.20) | 21,434.71<br>(18,743.04-24,521.75) | 19,602.23<br>(16,925.14-22,741.50) | 18,323.38<br>(15,641.80-21,384.38) |
| Cyprus  | Group I    | 2,421.90<br>(2,163.46-2,714.41)    | 2,039.91<br>(1,802.80-2,336.36)    | 1,708.21<br>(1,489.16-1,981.09)    | 1,502.93<br>(1,295.60-1,776.44)    | 1,386.56<br>(1,174.92-1,664.22)    | 1,294.05<br>(1,080.83-1,587.01)    |
| Cyprus  | NCD        | 19,672.84<br>(17,367.19-22,265.50) | 19,500.61<br>(17,163.12-22,201.00) | 18,429.66<br>(16,146.04-21,012.00) | 17,263.65<br>(14,957.56-19,909.26) | 16,206.86<br>(13,902.66-18,889.67) | 15,299.91<br>(12,974.63-17,954.91) |
| Cyprus  | Injuries   | 2,980.15<br>(2,679.29-3,349.05)    | 2,936.57<br>(2,639.17-3,309.17)    | 2,776.58<br>(2,500.66-3,129.79)    | 2,668.13<br>(2,381.86-3,015.70)    | 2,008.80<br>(1,764.19-2,322.52)    | 1,729.42<br>(1,497.16-2,034.04)    |
| Denmark | All causes | 26,780.57<br>(24,065.40-29,873.61) | 25,961.17<br>(23,206.85-29,063.98) | 23,857.59<br>(21,116.37-26,969.66) | 22,299.81<br>(19,570.83-25,457.12) | 20,937.85<br>(18,233.21-23,968.84) | 19,816.08<br>(17,180.42-22,787.10) |
| Denmark | Group I    | 1,700.46<br>(1,505.93-1,964.69)    | 1,673.11<br>(1,472.62-1,934.10)    | 1,398.60<br>(1,187.70-1,678.62)    | 1,398.63<br>(1,178.51-1,683.85)    | 1,338.09<br>(1,115.90-1,624.61)    | 1,242.63<br>(1,020.95-1,531.42)    |
| Denmark | NCD        | 21,778.22<br>(19,480.96-24,330.16) | 21,520.76<br>(19,179.04-24,128.30) | 20,162.11<br>(17,816.52-22,761.48) | 18,997.49<br>(16,626.77-21,625.56) | 17,993.44<br>(15,637.47-20,577.18) | 17,123.35<br>(14,725.05-19,656.05) |
| Denmark | Injuries   | 3,301.89<br>(2,999.14-3,666.79)    | 2,767.30<br>(2,502.24-3,071.12)    | 2,296.88<br>(2,068.41-2,576.78)    | 1,903.68<br>(1,704.60-2,162.29)    | 1,606.32<br>(1,422.63-1,843.89)    | 1,450.10<br>(1,268.79-1,672.19)    |
| Finland | All causes | 26,831.21<br>(23,990.50-30,110.76) | 24,516.59<br>(21,634.87-27,721.78) | 23,216.89<br>(20,355.50-26,430.47) | 22,028.77<br>(19,173.09-25,294.19) | 20,757.18<br>(17,992.50-23,968.03) | 19,645.32<br>(16,933.79-22,790.10) |
| Finland | Group I    | 1,907.29<br>(1,645.09-2,250.01)    | 1,680.80<br>(1,429.93-2,018.26)    | 1,455.75<br>(1,219.94-1,767.27)    | 1,236.12<br>(1,010.16-1,542.20)    | 1,081.67<br>(851.46-1,379.59)      | 991.52<br>(764.26-1,284.19)        |
| Finland | NCD        | 20,785.14<br>(18,456.57-23,410.38) | 19,380.01<br>(17,041.52-21,970.23) | 18,654.89<br>(16,290.42-21,274.05) | 17,870.10<br>(15,499.99-20,456.33) | 17,124.67<br>(14,786.13-19,685.06) | 16,414.50<br>(14,064.93-18,965.58) |
| Finland | Injuries   | 4,138.77<br>(3,818.18-4,512.96)    | 3,455.79<br>(3,176.57-3,784.22)    | 3,106.25<br>(2,845.53-3,426.36)    | 2,922.56<br>(2,636.93-3,280.07)    | 2,550.84<br>(2,275.80-2,888.59)    | 2,239.30<br>(1,977.46-2,569.34)    |
| France  | All causes | 24,328.58<br>(21,584.32-27,528.53) | 23,043.10<br>(20,311.21-26,219.41) | 21,966.62<br>(19,256.66-25,102.49) | 20,253.33<br>(17,572.10-23,398.53) | 19,279.44<br>(16,631.67-22,343.33) | 18,745.93<br>(16,183.78-21,761.56) |
| France  | Group I    | 1,939.76<br>(1,734.18-2,215.01)    | 1,857.43<br>(1,657.43-2,151.99)    | 1,506.70<br>(1,302.48-1,794.75)    | 1,346.09<br>(1,139.95-1,639.74)    | 1,281.18<br>(1,072.42-1,566.79)    | 1,170.86<br>(949.35-1,473.87)      |
| France  | NCD        | 18,345.18<br>(16,145.60-20,821.41) | 17,562.50<br>(15,336.25-20,050.12) | 17,183.25<br>(14,995.48-19,624.50) | 16,175.92<br>(13,967.52-18,644.33) | 15,582.45<br>(13,360.00-18,078.25) | 15,314.23<br>(13,111.15-17,787.47) |
| France  | Injuries   | 4,043.64<br>(3,684.80-4,487.02)    | 3,623.17<br>(3,277.78-4,036.69)    | 3,276.67<br>(2,959.45-3,652.38)    | 2,731.32<br>(2,443.35-3,086.63)    | 2,415.81<br>(2,145.39-2,751.17)    | 2,260.85<br>(2,006.06-2,573.40)    |

**Appendix Table 4. Rate of DALYs per 100,000 individuals for all causes and level 1 cause groups by location for 1990 - 2015, both sexes combined.**

|            | Cause      | 1990                               | 1995                               | 2000                               | 2005                               | 2010                               | 2015                               |
|------------|------------|------------------------------------|------------------------------------|------------------------------------|------------------------------------|------------------------------------|------------------------------------|
| Germany    | All causes | 26,395.21<br>(23,589.54–29,592.07) | 24,664.75<br>(21,843.66–27,861.64) | 22,871.62<br>(20,092.38–26,009.56) | 21,123.08<br>(18,383.35–24,266.00) | 20,014.32<br>(17,304.45–23,073.22) | 19,399.06<br>(16,689.53–22,469.01) |
| Germany    | Group I    | 1,799.18<br>(1,561.52–2,109.81)    | 1,548.33<br>(1,312.36–1,854.68)    | 1,410.18<br>(1,181.55–1,717.86)    | 1,347.34<br>(1,117.46–1,641.68)    | 1,294.60<br>(1,071.05–1,602.37)    | 1,234.33<br>(1,001.74–1,562.03)    |
| Germany    | NCD        | 21,729.12<br>(19,425.04–24,343.80) | 20,530.53<br>(18,173.50–23,138.70) | 19,195.89<br>(16,871.68–21,848.05) | 17,884.43<br>(15,556.98–20,497.04) | 17,060.13<br>(14,732.25–19,648.77) | 16,603.31<br>(14,252.72–19,157.23) |
| Germany    | Injuries   | 2,866.91<br>(2,578.14–3,207.33)    | 2,585.89<br>(2,313.50–2,902.61)    | 2,265.55<br>(2,013.83–2,564.88)    | 1,891.30<br>(1,659.90–2,178.02)    | 1,659.59<br>(1,443.17–1,920.08)    | 1,561.43<br>(1,354.35–1,824.95)    |
| Greece     | All causes | 23,667.12<br>(21,007.92–26,738.49) | 22,700.48<br>(20,055.84–25,816.20) | 21,706.85<br>(19,097.41–24,743.97) | 20,514.62<br>(17,880.62–23,512.96) | 19,462.32<br>(16,851.77–22,510.59) | 18,804.29<br>(16,201.40–21,726.51) |
| Greece     | Group I    | 1,718.14<br>(1,498.49–2,057.65)    | 1,626.42<br>(1,412.94–1,942.86)    | 1,430.61<br>(1,216.86–1,710.77)    | 1,273.45<br>(1,060.23–1,550.40)    | 1,208.39<br>(1,005.29–1,485.79)    | 1,059.98<br>(850.97–1,335.35)      |
| Greece     | NCD        | 19,048.12<br>(16,865.78–21,504.16) | 18,391.46<br>(16,201.11–20,832.65) | 17,818.97<br>(15,629.61–20,283.93) | 17,062.92<br>(14,872.53–19,489.67) | 16,395.27<br>(14,199.35–18,850.63) | 16,095.73<br>(13,850.74–18,571.36) |
| Greece     | Injuries   | 2,900.86<br>(2,572.91–3,281.85)    | 2,682.60<br>(2,380.08–3,036.75)    | 2,457.27<br>(2,176.06–2,791.67)    | 2,178.26<br>(1,926.25–2,491.58)    | 1,858.66<br>(1,629.42–2,148.46)    | 1,648.58<br>(1,438.14–1,918.40)    |
| Iceland    | All causes | 22,238.96<br>(19,619.82–25,289.13) | 22,762.28<br>(19,676.12–26,241.03) | 19,562.61<br>(16,926.63–22,557.81) | 18,307.07<br>(15,641.98–21,329.57) | 17,104.50<br>(14,535.13–19,973.02) | 16,587.07<br>(13,941.27–19,523.43) |
| Iceland    | Group I    | 1,615.58<br>(1,429.25–1,860.13)    | 1,516.37<br>(1,325.03–1,763.95)    | 1,269.16<br>(1,075.18–1,523.40)    | 1,138.68<br>(943.87–1,399.58)      | 1,059.53<br>(860.38–1,318.48)      | 997.63<br>(804.23–1,259.30)        |
| Iceland    | NCD        | 17,922.84<br>(15,683.70–20,474.72) | 17,105.90<br>(14,831.07–19,626.67) | 16,139.16<br>(13,896.36–18,656.95) | 15,211.98<br>(12,974.97–17,674.88) | 14,434.41<br>(12,177.58–16,871.64) | 14,120.24<br>(11,801.43–16,617.18) |
| Iceland    | Injuries   | 2,700.53<br>(2,414.07–3,039.96)    | 4,140.01<br>(3,292.63–5,196.78)    | 2,154.29<br>(1,902.28–2,467.88)    | 1,956.41<br>(1,702.68–2,265.94)    | 1,610.56<br>(1,410.23–1,850.72)    | 1,469.19<br>(1,275.30–1,703.62)    |
| Ireland    | All causes | 25,285.66<br>(22,422.02–28,536.90) | 23,997.21<br>(21,237.82–27,219.27) | 23,182.04<br>(20,377.88–26,386.93) | 20,799.29<br>(18,001.10–24,054.03) | 19,432.66<br>(16,608.76–22,539.47) | 18,751.17<br>(16,075.51–21,869.18) |
| Ireland    | Group I    | 1,916.54<br>(1,681.80–2,225.75)    | 1,808.54<br>(1,577.17–2,113.99)    | 1,704.90<br>(1,478.08–2,003.70)    | 1,432.50<br>(1,207.46–1,737.81)    | 1,319.50<br>(1,091.09–1,647.03)    | 1,209.06<br>(980.98–1,523.36)      |
| Ireland    | NCD        | 20,630.05<br>(18,176.62–23,347.50) | 19,753.95<br>(17,401.65–22,469.99) | 19,121.15<br>(16,754.14–21,793.54) | 17,495.97<br>(15,096.81–20,198.92) | 16,487.16<br>(14,072.14–19,145.90) | 16,051.99<br>(13,633.35–18,677.03) |
| Ireland    | Injuries   | 2,739.07<br>(2,444.80–3,077.10)    | 2,434.72<br>(2,184.04–2,735.48)    | 2,356.00<br>(2,120.90–2,645.93)    | 1,870.81<br>(1,649.51–2,138.21)    | 1,626.00<br>(1,427.51–1,871.46)    | 1,490.12<br>(1,303.64–1,725.07)    |
| Israel     | All causes | 24,288.52<br>(21,622.21–27,430.76) | 23,238.68<br>(20,557.42–26,298.62) | 21,885.25<br>(19,212.66–24,931.20) | 20,509.31<br>(17,869.25–23,468.47) | 18,520.97<br>(15,893.74–21,519.88) | 18,017.99<br>(15,392.53–20,990.82) |
| Israel     | Group I    | 2,044.49<br>(1,790.33–2,367.73)    | 1,793.21<br>(1,543.31–2,101.85)    | 1,682.77<br>(1,451.40–2,009.45)    | 1,529.61<br>(1,305.01–1,852.28)    | 1,419.45<br>(1,180.99–1,752.37)    | 1,314.10<br>(1,078.32–1,634.94)    |
| Israel     | NCD        | 19,405.78<br>(17,214.71–21,951.43) | 18,726.61<br>(16,515.35–21,235.91) | 17,619.03<br>(15,425.54–20,112.42) | 16,552.03<br>(14,369.53–19,005.89) | 15,148.29<br>(12,935.87–17,622.68) | 14,878.90<br>(12,652.57–17,441.42) |
| Israel     | Injuries   | 2,838.25<br>(2,522.92–3,205.82)    | 2,718.86<br>(2,428.09–3,071.01)    | 2,583.45<br>(2,293.86–2,917.80)    | 2,427.67<br>(2,156.59–2,754.63)    | 1,953.23<br>(1,723.11–2,254.32)    | 1,824.98<br>(1,597.03–2,119.64)    |
| Italy      | All causes | 24,025.64<br>(21,239.67–27,154.51) | 22,610.54<br>(19,865.57–25,665.38) | 20,911.84<br>(18,163.57–23,979.49) | 18,990.13<br>(16,338.68–22,010.35) | 17,998.50<br>(15,374.67–21,012.63) | 17,734.12<br>(15,117.64–20,803.46) |
| Italy      | Group I    | 1,821.34<br>(1,645.35–2,054.03)    | 1,756.95<br>(1,584.21–1,980.16)    | 1,275.96<br>(1,109.58–1,487.81)    | 1,113.33<br>(960.51–1,320.56)      | 1,056.22<br>(891.72–1,271.00)      | 943.30<br>(778.87–1,163.24)        |
| Italy      | NCD        | 19,486.89<br>(17,190.06–22,094.60) | 18,362.41<br>(16,070.30–20,941.67) | 17,359.12<br>(15,064.12–19,960.39) | 15,963.80<br>(13,681.35–18,549.37) | 15,353.21<br>(13,066.97–17,915.48) | 15,306.37<br>(12,974.68–17,923.54) |
| Italy      | Injuries   | 2,717.41<br>(2,421.45–3,078.92)    | 2,491.17<br>(2,209.59–2,833.25)    | 2,276.75<br>(2,018.34–2,600.97)    | 1,913.00<br>(1,678.93–2,206.70)    | 1,589.08<br>(1,375.67–1,860.86)    | 1,484.44<br>(1,283.73–1,745.86)    |
| Luxembourg | All causes | 27,240.40<br>(24,368.83–30,576.11) | 24,779.52<br>(21,850.73–28,075.16) | 22,684.66<br>(19,820.49–25,947.51) | 20,762.16<br>(17,952.47–23,955.89) | 19,116.64<br>(16,348.18–22,335.71) | 18,274.45<br>(15,504.38–21,440.86) |
| Luxembourg | Group I    | 1,671.10<br>(1,451.38–1,952.19)    | 1,461.02<br>(1,244.95–1,735.92)    | 1,302.84<br>(1,098.82–1,565.82)    | 1,196.44<br>(984.38–1,462.10)      | 1,132.29<br>(920.27–1,398.72)      | 1,065.71<br>(850.86–1,340.14)      |
| Luxembourg | NCD        | 21,964.92<br>(19,582.94–24,731.83) | 20,251.98<br>(17,793.17–23,024.52) | 18,782.99<br>(16,320.19–21,489.15) | 17,432.52<br>(15,007.59–20,128.66) | 16,251.82<br>(13,851.52–18,989.45) | 15,620.50<br>(13,222.13–18,342.06) |

**Appendix Table 4. Rate of DALYs per 100,000 individuals for all causes and level 1 cause groups by location for 1990 - 2015, both sexes combined.**

|             | Cause      | 1990                               | 1995                               | 2000                               | 2005                               | 2010                               | 2015                               |
|-------------|------------|------------------------------------|------------------------------------|------------------------------------|------------------------------------|------------------------------------|------------------------------------|
| Luxembourg  | Injuries   | 3,604.39<br>(3,245.09–4,047.56)    | 3,066.51<br>(2,730.98–3,464.53)    | 2,598.83<br>(2,294.39–2,961.58)    | 2,133.20<br>(1,873.54–2,458.85)    | 1,732.53<br>(1,496.12–2,023.00)    | 1,588.25<br>(1,366.82–1,867.69)    |
| Malta       | All causes | 23,903.59<br>(21,137.81–27,117.48) | 22,368.51<br>(19,600.31–25,626.99) | 21,483.86<br>(18,614.57–24,687.04) | 19,792.87<br>(17,056.13–22,920.65) | 19,100.19<br>(16,355.19–22,206.51) | 18,472.25<br>(15,799.36–21,592.88) |
| Malta       | Group I    | 1,891.87<br>(1,662.15–2,179.65)    | 1,902.23<br>(1,666.48–2,201.31)    | 1,683.90<br>(1,461.43–1,966.70)    | 1,544.40<br>(1,324.73–1,826.03)    | 1,481.24<br>(1,254.53–1,768.91)    | 1,405.71<br>(1,182.30–1,687.77)    |
| Malta       | NCD        | 19,883.03<br>(17,573.61–22,544.07) | 18,549.23<br>(16,236.78–21,303.45) | 17,981.81<br>(15,571.01–20,763.70) | 16,661.96<br>(14,333.15–19,401.90) | 16,191.17<br>(13,816.12–18,841.93) | 15,760.56<br>(13,455.89–18,476.68) |
| Malta       | Injuries   | 2,128.69<br>(1,846.36–2,463.42)    | 1,917.05<br>(1,648.05–2,234.39)    | 1,818.15<br>(1,557.03–2,125.23)    | 1,586.52<br>(1,346.05–1,878.43)    | 1,427.78<br>(1,208.03–1,715.95)    | 1,305.98<br>(1,088.43–1,580.10)    |
| Netherlands | All causes | 24,000.70<br>(21,241.61–27,095.83) | 23,216.23<br>(20,481.22–26,361.51) | 22,584.47<br>(19,802.62–25,729.81) | 20,735.99<br>(17,966.66–23,873.18) | 19,339.83<br>(16,636.75–22,478.90) | 18,794.83<br>(16,058.13–21,786.90) |
| Netherlands | Group I    | 1,586.65<br>(1,396.47–1,844.80)    | 1,569.54<br>(1,382.05–1,816.56)    | 1,539.71<br>(1,353.44–1,783.03)    | 1,383.25<br>(1,206.22–1,630.02)    | 1,236.52<br>(1,062.32–1,482.75)    | 1,164.80<br>(985.17–1,415.41)      |
| Netherlands | NCD        | 20,278.38<br>(17,936.15–22,897.46) | 19,670.41<br>(17,266.35–22,342.26) | 19,170.25<br>(16,724.88–21,826.17) | 17,732.28<br>(15,298.72–20,416.71) | 16,645.38<br>(14,270.10–19,297.49) | 16,221.63<br>(13,818.04–18,824.56) |
| Netherlands | Injuries   | 2,135.67<br>(1,920.37–2,391.64)    | 1,976.28<br>(1,765.46–2,229.63)    | 1,874.51<br>(1,676.64–2,112.50)    | 1,620.46<br>(1,423.67–1,851.09)    | 1,457.93<br>(1,276.64–1,693.53)    | 1,408.40<br>(1,226.32–1,643.05)    |
| Norway      | All causes | 24,783.18<br>(22,029.72–27,934.74) | 22,914.48<br>(20,170.77–26,069.81) | 22,281.69<br>(19,442.52–25,404.95) | 20,475.90<br>(17,710.14–23,627.87) | 19,486.02<br>(16,751.71–22,627.52) | 18,323.32<br>(15,619.69–21,379.61) |
| Norway      | Group I    | 1,759.41<br>(1,581.72–1,993.78)    | 1,435.45<br>(1,245.48–1,688.57)    | 1,305.57<br>(1,115.68–1,567.20)    | 1,193.21<br>(1,002.13–1,444.52)    | 1,122.43<br>(923.10–1,392.19)      | 1,054.06<br>(852.41–1,318.90)      |
| Norway      | NCD        | 19,990.12<br>(17,635.49–22,606.14) | 19,087.11<br>(16,675.07–21,750.22) | 18,647.90<br>(16,188.76–21,416.77) | 17,285.17<br>(14,822.02–19,995.99) | 16,573.24<br>(14,185.64–19,273.28) | 15,756.15<br>(13,300.91–18,353.21) |
| Norway      | Injuries   | 3,033.65<br>(2,750.15–3,369.09)    | 2,391.91<br>(2,159.68–2,690.38)    | 2,328.22<br>(2,090.26–2,609.14)    | 1,997.51<br>(1,776.80–2,278.24)    | 1,790.35<br>(1,589.23–2,047.69)    | 1,513.10<br>(1,332.70–1,751.22)    |
| Portugal    | All causes | 28,882.18<br>(26,040.69–32,169.41) | 26,878.99<br>(24,096.68–30,184.01) | 24,905.51<br>(22,153.91–28,154.89) | 22,469.70<br>(19,748.69–25,687.94) | 20,531.50<br>(17,873.26–23,681.51) | 19,462.46<br>(16,800.49–22,635.91) |
| Portugal    | Group I    | 2,591.37<br>(2,369.40–2,922.84)    | 2,618.50<br>(2,396.96–2,923.29)    | 2,456.53<br>(2,221.36–2,768.65)    | 2,058.86<br>(1,829.91–2,356.38)    | 1,735.93<br>(1,510.86–2,037.49)    | 1,561.49<br>(1,331.92–1,866.20)    |
| Portugal    | NCD        | 21,762.75<br>(19,439.11–24,458.98) | 20,447.62<br>(18,196.78–23,157.91) | 19,295.12<br>(17,016.01–21,989.07) | 17,866.62<br>(15,558.51–20,555.07) | 16,745.98<br>(14,448.41–19,416.55) | 16,097.94<br>(13,770.25–18,764.62) |
| Portugal    | Injuries   | 4,528.05<br>(4,133.49–4,997.36)    | 3,812.86<br>(3,463.98–4,237.08)    | 3,153.86<br>(2,838.53–3,537.52)    | 2,544.21<br>(2,256.15–2,877.73)    | 2,049.60<br>(1,810.35–2,349.63)    | 1,803.04<br>(1,588.87–2,082.62)    |
| Spain       | All causes | 24,260.40<br>(21,522.49–27,399.46) | 22,867.61<br>(20,161.89–25,977.59) | 21,181.36<br>(18,484.04–24,267.09) | 19,708.89<br>(17,060.83–22,769.43) | 17,982.22<br>(15,379.77–20,964.28) | 17,118.08<br>(14,544.87–20,046.92) |
| Spain       | Group I    | 2,220.31<br>(1,942.61–2,565.33)    | 2,381.24<br>(2,103.96–2,735.84)    | 1,762.22<br>(1,496.77–2,122.36)    | 1,627.97<br>(1,366.23–1,979.50)    | 1,460.01<br>(1,188.79–1,806.75)    | 1,336.59<br>(1,061.74–1,703.07)    |
| Spain       | NCD        | 18,890.33<br>(16,772.57–21,366.50) | 17,914.29<br>(15,771.85–20,364.78) | 17,035.81<br>(14,894.38–19,458.72) | 16,069.32<br>(13,944.52–18,468.41) | 14,985.38<br>(12,864.11–17,410.09) | 14,412.28<br>(12,239.59–16,798.13) |
| Spain       | Injuries   | 3,149.75<br>(2,835.53–3,529.07)    | 2,572.08<br>(2,285.54–2,922.54)    | 2,383.34<br>(2,114.74–2,704.90)    | 2,011.60<br>(1,772.24–2,327.60)    | 1,536.84<br>(1,320.91–1,810.48)    | 1,369.21<br>(1,179.54–1,618.77)    |
| Sweden      | All causes | 22,591.52<br>(20,002.07–25,539.54) | 20,974.21<br>(18,381.71–23,927.13) | 20,109.52<br>(17,470.33–23,064.55) | 19,199.82<br>(16,583.72–22,135.90) | 18,184.84<br>(15,590.59–21,027.58) | 17,748.89<br>(15,165.63–20,565.24) |
| Sweden      | Group I    | 1,480.16<br>(1,286.39–1,746.12)    | 1,305.84<br>(1,106.35–1,592.93)    | 1,209.54<br>(995.04–1,498.33)      | 1,160.43<br>(936.64–1,458.14)      | 1,129.70<br>(897.71–1,426.79)      | 1,064.30<br>(843.19–1,359.56)      |
| Sweden      | NCD        | 18,646.57<br>(16,417.93–21,099.70) | 17,516.51<br>(15,277.78–19,987.22) | 16,946.67<br>(14,671.70–19,415.52) | 16,219.57<br>(14,046.08–18,671.21) | 15,418.79<br>(13,205.85–17,857.29) | 15,144.10<br>(12,882.21–17,534.03) |
| Sweden      | Injuries   | 2,464.79<br>(2,250.30–2,729.98)    | 2,151.85<br>(1,945.37–2,412.56)    | 1,953.31<br>(1,753.64–2,207.54)    | 1,819.82<br>(1,631.70–2,062.00)    | 1,636.35<br>(1,455.48–1,873.19)    | 1,540.49<br>(1,363.28–1,767.81)    |
| Switzerland | All causes | 24,098.14<br>(21,296.47–27,350.15) | 22,675.53<br>(19,911.39–25,906.68) | 21,124.98<br>(18,311.48–24,348.19) | 19,406.41<br>(16,651.27–22,554.16) | 18,183.89<br>(15,518.88–21,289.83) | 17,467.76<br>(14,766.83–20,500.83) |
| Switzerland | Group I    | 1,695.38<br>(1,485.27–1,971.21)    | 1,743.98<br>(1,531.44–2,017.51)    | 1,411.30<br>(1,202.39–1,686.23)    | 1,253.50<br>(1,049.52–1,538.32)    | 1,179.62<br>(981.39–1,461.00)      | 1,121.75<br>(899.99–1,393.78)      |

**Appendix Table 4. Rate of DALYs per 100,000 individuals for all causes and level 1 cause groups by location for 1990 - 2015, both sexes combined.**

|                        | Cause      | 1990                               | 1995                               | 2000                               | 2005                               | 2010                               | 2015                               |
|------------------------|------------|------------------------------------|------------------------------------|------------------------------------|------------------------------------|------------------------------------|------------------------------------|
| Switzerland            | NCD        | 18,526.28<br>(16,261.97–21,090.58) | 17,878.79<br>(15,603.82–20,460.01) | 17,075.29<br>(14,731.84–19,665.10) | 15,986.65<br>(13,629.31–18,613.36) | 15,185.30<br>(12,870.68–17,768.81) | 14,668.28<br>(12,373.04–17,208.87) |
| Switzerland            | Injuries   | 3,876.49<br>(3,480.55–4,354.10)    | 3,052.77<br>(2,720.67–3,455.85)    | 2,638.40<br>(2,336.22–2,990.76)    | 2,166.26<br>(1,905.18–2,483.10)    | 1,818.98<br>(1,580.20–2,124.57)    | 1,677.73<br>(1,460.65–1,959.47)    |
| United Kingdom         | All causes | 25,558.61<br>(22,855.56–28,645.61) | 24,161.61<br>(21,439.89–27,283.75) | 22,900.67<br>(20,191.09–26,010.95) | 21,499.93<br>(18,778.85–24,619.61) | 20,134.38<br>(17,470.97–23,179.24) | 19,321.03<br>(16,682.76–22,315.21) |
| United Kingdom         | Group I    | 2,073.21<br>(1,859.84–2,351.88)    | 2,049.10<br>(1,827.58–2,336.40)    | 1,922.82<br>(1,702.38–2,216.67)    | 1,756.17<br>(1,529.36–2,051.83)    | 1,598.66<br>(1,378.95–1,894.50)    | 1,494.25<br>(1,274.16–1,788.04)    |
| United Kingdom         | NCD        | 21,266.18<br>(18,947.68–23,855.84) | 20,091.80<br>(17,770.93–22,670.64) | 19,068.38<br>(16,750.27–21,660.06) | 18,027.00<br>(15,698.22–20,616.71) | 17,002.53<br>(14,680.40–19,566.09) | 16,465.77<br>(14,160.43–19,006.01) |
| United Kingdom         | Injuries   | 2,219.22<br>(1,976.55–2,512.05)    | 2,020.71<br>(1,793.32–2,299.88)    | 1,909.47<br>(1,683.49–2,181.64)    | 1,716.76<br>(1,499.92–1,984.12)    | 1,533.19<br>(1,332.83–1,785.35)    | 1,361.01<br>(1,176.29–1,593.94)    |
| England                | All causes | 25,165.31<br>(22,481.64–28,226.28) | 23,763.00<br>(21,069.93–26,852.96) | 22,498.06<br>(19,810.23–25,590.93) | 21,082.37<br>(18,392.31–24,159.56) | 19,709.80<br>(17,082.99–22,727.32) | 18,942.19<br>(16,317.93–21,918.89) |
| England                | Group I    | 2,065.05<br>(1,847.47–2,348.01)    | 2,049.65<br>(1,825.08–2,345.45)    | 1,929.10<br>(1,707.35–2,232.69)    | 1,754.41<br>(1,525.91–2,052.26)    | 1,600.29<br>(1,376.07–1,901.14)    | 1,492.16<br>(1,267.17–1,788.47)    |
| England                | NCD        | 20,956.70<br>(18,651.53–23,517.13) | 19,771.77<br>(17,464.94–22,331.20) | 18,735.02<br>(16,427.50–21,312.29) | 17,686.62<br>(15,370.71–20,259.02) | 16,663.41<br>(14,367.24–19,207.63) | 16,153.56<br>(13,871.27–18,665.31) |
| England                | Injuries   | 2,143.56<br>(1,905.57–2,430.60)    | 1,941.58<br>(1,716.35–2,220.69)    | 1,833.93<br>(1,611.13–2,100.03)    | 1,641.35<br>(1,430.99–1,905.28)    | 1,446.10<br>(1,251.40–1,697.83)    | 1,296.47<br>(1,115.10–1,522.99)    |
| Northern Ireland       | All causes | 26,436.57<br>(23,760.45–29,515.62) | 24,630.14<br>(21,973.64–27,674.58) | 23,054.75<br>(20,320.29–26,208.74) | 22,231.44<br>(19,519.25–25,356.73) | 21,586.26<br>(18,866.85–24,637.14) | 20,117.34<br>(17,495.75–23,143.61) |
| Northern Ireland       | Group I    | 2,359.24<br>(2,157.92–2,647.54)    | 2,248.13<br>(2,027.34–2,540.83)    | 1,991.47<br>(1,760.25–2,293.07)    | 1,837.46<br>(1,615.47–2,134.81)    | 1,696.06<br>(1,475.01–1,988.92)    | 1,563.16<br>(1,326.17–1,872.28)    |
| Northern Ireland       | NCD        | 21,391.91<br>(19,131.43–23,922.50) | 19,939.27<br>(17,651.53–22,496.59) | 18,785.32<br>(16,451.64–21,391.30) | 18,105.31<br>(15,821.33–20,676.84) | 17,370.13<br>(15,120.98–19,884.13) | 16,676.51<br>(14,442.32–19,187.44) |
| Northern Ireland       | Injuries   | 2,685.43<br>(2,416.40–3,030.76)    | 2,442.74<br>(2,180.61–2,750.90)    | 2,277.96<br>(2,023.81–2,587.01)    | 2,288.67<br>(2,015.03–2,600.98)    | 2,520.08<br>(2,149.99–2,940.95)    | 1,877.67<br>(1,639.83–2,191.32)    |
| Scotland               | All causes | 28,743.45<br>(25,872.30–32,008.58) | 27,330.27<br>(24,370.43–30,638.86) | 26,187.83<br>(23,291.94–29,507.05) | 24,727.39<br>(21,782.33–28,001.94) | 23,075.45<br>(20,178.08–26,302.07) | 21,961.28<br>(19,119.21–25,102.78) |
| Scotland               | Group I    | 2,082.93<br>(1,886.34–2,341.46)    | 1,963.75<br>(1,767.30–2,221.74)    | 1,804.19<br>(1,603.74–2,068.35)    | 1,722.19<br>(1,517.62–1,992.95)    | 1,487.87<br>(1,287.85–1,750.12)    | 1,415.16<br>(1,211.05–1,680.43)    |
| Scotland               | NCD        | 23,878.15<br>(21,452.44–26,647.35) | 22,779.05<br>(20,295.71–25,547.13) | 21,910.98<br>(19,459.52–24,677.71) | 20,786.02<br>(18,214.77–23,541.74) | 19,592.20<br>(17,072.65–22,357.29) | 18,783.39<br>(16,226.90–21,535.09) |
| Scotland               | Injuries   | 2,782.37<br>(2,504.47–3,141.09)    | 2,587.47<br>(2,324.79–2,917.19)    | 2,472.66<br>(2,221.12–2,791.93)    | 2,219.18<br>(1,968.84–2,523.11)    | 1,995.38<br>(1,765.41–2,281.41)    | 1,762.72<br>(1,551.05–2,019.96)    |
| Wales                  | All causes | 26,048.28<br>(23,182.75–29,280.36) | 24,931.54<br>(22,063.82–28,188.30) | 23,797.48<br>(20,965.21–27,021.41) | 22,493.23<br>(19,639.08–25,679.84) | 21,394.99<br>(18,543.37–24,568.69) | 20,744.39<br>(17,884.29–23,924.34) |
| Wales                  | Group I    | 2,075.06<br>(1,826.38–2,374.36)    | 2,089.16<br>(1,831.63–2,412.49)    | 1,990.37<br>(1,741.58–2,309.46)    | 1,799.55<br>(1,532.86–2,120.56)    | 1,681.84<br>(1,421.55–1,992.92)    | 1,613.06<br>(1,348.87–1,941.04)    |
| Wales                  | NCD        | 21,746.35<br>(19,323.65–24,479.64) | 20,746.37<br>(18,311.96–23,417.50) | 19,814.02<br>(17,394.78–22,485.84) | 18,882.79<br>(16,469.52–21,569.00) | 18,050.71<br>(15,610.25–20,676.74) | 17,631.25<br>(15,180.86–20,344.55) |
| Wales                  | Injuries   | 2,226.87<br>(1,979.05–2,528.34)    | 2,096.01<br>(1,860.52–2,378.10)    | 1,993.08<br>(1,761.56–2,279.87)    | 1,810.89<br>(1,582.41–2,092.07)    | 1,662.43<br>(1,444.98–1,939.45)    | 1,500.08<br>(1,306.70–1,756.68)    |
| Southern Latin America | All causes | 30,732.87<br>(28,144.44–33,750.06) | 28,724.94<br>(26,131.11–31,698.83) | 27,101.34<br>(24,490.22–30,113.66) | 25,481.52<br>(22,900.03–28,419.83) | 24,687.15<br>(22,116.16–27,604.01) | 23,733.05<br>(21,107.48–26,721.07) |
| Southern Latin America | Group I    | 4,687.37<br>(4,399.86–5,062.48)    | 4,120.13<br>(3,841.48–4,473.28)    | 3,701.23<br>(3,436.07–4,024.38)    | 3,357.95<br>(3,092.68–3,694.19)    | 3,107.16<br>(2,843.55–3,433.94)    | 2,773.29<br>(2,517.11–3,087.90)    |
| Southern Latin America | NCD        | 22,499.98<br>(20,382.12–24,887.11) | 21,149.08<br>(19,047.23–23,563.34) | 20,108.89<br>(17,991.49–22,517.37) | 19,175.17<br>(17,041.32–21,586.96) | 18,677.05<br>(16,539.96–21,084.67) | 18,238.71<br>(16,053.47–20,693.07) |
| Southern Latin America | Injuries   | 3,545.53<br>(3,291.65–3,851.34)    | 3,455.73<br>(3,202.42–3,762.50)    | 3,291.23<br>(3,046.40–3,590.95)    | 2,948.40<br>(2,719.56–3,240.55)    | 2,902.94<br>(2,682.38–3,193.30)    | 2,721.05<br>(2,496.90–3,007.74)    |
| Argentina              | All causes | 31,236.31<br>(28,616.87–34,269.89) | 29,617.30<br>(27,015.66–32,612.71) | 28,417.52<br>(25,774.65–31,443.35) | 26,663.11<br>(24,048.38–29,617.84) | 25,720.57<br>(23,126.21–28,646.85) | 24,854.23<br>(22,211.54–27,907.17) |

**Appendix Table 4. Rate of DALYs per 100,000 individuals for all causes and level 1 cause groups by location for 1990 - 2015, both sexes combined.**

|                                                  | Cause      | 1990                               | 1995                               | 2000                               | 2005                               | 2010                               | 2015                               |
|--------------------------------------------------|------------|------------------------------------|------------------------------------|------------------------------------|------------------------------------|------------------------------------|------------------------------------|
| Argentina                                        | Group I    | 5,042.73<br>(4,707.29–5,471.90)    | 4,591.67<br>(4,269.33–4,983.77)    | 4,238.73<br>(3,938.85–4,599.17)    | 3,894.69<br>(3,596.04–4,279.59)    | 3,594.02<br>(3,300.20–3,950.94)    | 3,202.38<br>(2,921.90–3,548.67)    |
| Argentina                                        | NCD        | 22,793.09<br>(20,672.59–25,177.66) | 21,636.83<br>(19,552.93–24,038.40) | 20,777.07<br>(18,647.51–23,156.74) | 19,730.35<br>(17,604.82–22,138.25) | 19,214.56<br>(17,095.93–21,631.52) | 18,849.57<br>(16,659.47–21,337.13) |
| Argentina                                        | Injuries   | 3,400.50<br>(3,137.55–3,703.20)    | 3,388.80<br>(3,132.65–3,702.61)    | 3,401.73<br>(3,148.87–3,714.16)    | 3,038.07<br>(2,796.56–3,342.32)    | 2,912.00<br>(2,682.75–3,212.14)    | 2,802.27<br>(2,569.82–3,107.69)    |
| Chile                                            | All causes | 29,663.38<br>(27,079.42–32,608.96) | 26,184.85<br>(23,635.03–29,113.16) | 23,500.76<br>(20,917.99–26,623.58) | 22,265.36<br>(19,750.97–25,167.88) | 22,036.37<br>(19,448.39–24,930.88) | 20,937.83<br>(18,322.87–23,725.41) |
| Chile                                            | Group I    | 4,104.46<br>(3,874.86–4,403.50)    | 3,091.75<br>(2,883.26–3,351.42)    | 2,411.44<br>(2,215.14–2,669.58)    | 2,013.07<br>(1,817.14–2,276.28)    | 1,932.68<br>(1,731.35–2,193.34)    | 1,739.86<br>(1,535.36–1,991.39)    |
| Chile                                            | NCD        | 21,628.58<br>(19,478.17–24,077.62) | 19,538.43<br>(17,421.15–21,953.99) | 18,127.81<br>(15,939.88–20,571.37) | 17,592.93<br>(15,447.35–20,028.59) | 17,298.06<br>(15,155.23–19,707.52) | 16,753.01<br>(14,502.52–19,131.01) |
| Chile                                            | Injuries   | 3,930.34<br>(3,674.15–4,261.80)    | 3,554.67<br>(3,301.11–3,847.88)    | 2,961.50<br>(2,743.50–3,235.83)    | 2,659.36<br>(2,458.62–2,917.45)    | 2,805.63<br>(2,534.59–3,134.93)    | 2,444.96<br>(2,208.69–2,727.07)    |
| Uruguay                                          | All causes | 29,941.56<br>(27,440.69–32,971.41) | 29,402.27<br>(26,820.16–32,367.77) | 27,401.64<br>(24,853.15–30,324.80) | 25,919.79<br>(23,358.15–28,856.23) | 24,826.34<br>(22,250.07–27,768.02) | 24,174.88<br>(21,567.49–27,167.97) |
| Uruguay                                          | Group I    | 3,920.98<br>(3,628.29–4,290.37)    | 3,702.01<br>(3,414.25–4,044.98)    | 3,166.39<br>(2,884.41–3,519.61)    | 2,903.78<br>(2,604.34–3,279.24)    | 2,525.54<br>(2,223.91–2,894.23)    | 2,349.67<br>(2,010.01–2,751.51)    |
| Uruguay                                          | NCD        | 22,621.03<br>(20,534.96–25,018.16) | 22,043.19<br>(19,900.68–24,434.39) | 20,804.79<br>(18,684.16–23,171.59) | 19,875.55<br>(17,738.77–22,257.05) | 19,134.74<br>(16,967.14–21,522.34) | 18,808.88<br>(16,627.43–21,237.90) |
| Uruguay                                          | Injuries   | 3,399.55<br>(3,145.76–3,712.22)    | 3,657.08<br>(3,408.46–3,954.36)    | 3,430.45<br>(3,200.12–3,724.75)    | 3,140.46<br>(2,919.89–3,407.24)    | 3,166.06<br>(2,949.96–3,444.55)    | 3,015.64<br>(2,788.50–3,296.62)    |
| Central Europe, Eastern Europe, and Central Asia | All causes | 38,139.52<br>(35,176.29–41,466.28) | 43,885.62<br>(40,990.06–47,166.22) | 41,302.12<br>(38,394.74–44,586.49) | 39,754.39<br>(36,928.71–42,955.00) | 34,118.65<br>(31,316.88–37,349.13) | 31,158.70<br>(28,311.67–34,337.17) |
| Central Europe, Eastern Europe, and Central Asia | Group I    | 5,852.06<br>(5,510.53–6,280.41)    | 6,263.12<br>(5,903.06–6,716.30)    | 5,786.30<br>(5,421.66–6,184.04)    | 5,047.54<br>(4,694.13–5,468.66)    | 4,208.87<br>(3,857.20–4,622.75)    | 3,627.36<br>(3,283.14–4,037.34)    |
| Central Europe, Eastern Europe, and Central Asia | NCD        | 26,847.71<br>(24,527.62–29,420.03) | 30,482.66<br>(28,195.88–33,025.88) | 29,218.51<br>(26,896.01–31,788.24) | 28,852.45<br>(26,541.13–31,408.72) | 25,522.18<br>(23,194.62–28,097.84) | 23,634.06<br>(21,304.34–26,265.43) |
| Central Europe, Eastern Europe, and Central Asia | Injuries   | 5,439.74<br>(5,141.48–5,775.54)    | 7,139.84<br>(6,816.84–7,494.47)    | 6,297.31<br>(5,997.31–6,622.74)    | 5,854.41<br>(5,593.63–6,166.11)    | 4,387.59<br>(4,164.45–4,645.58)    | 3,897.28<br>(3,682.85–4,173.35)    |
| Eastern Europe                                   | All causes | 37,660.24<br>(34,614.36–41,102.86) | 46,842.98<br>(43,846.24–50,229.91) | 45,112.30<br>(42,103.05–48,537.73) | 44,705.60<br>(41,755.57–48,060.68) | 37,000.39<br>(34,058.15–40,336.14) | 33,761.31<br>(30,763.09–37,102.90) |
| Eastern Europe                                   | Group I    | 3,966.08<br>(3,607.02–4,419.61)    | 4,440.65<br>(4,059.93–4,893.10)    | 4,635.85<br>(4,272.50–5,075.21)    | 4,300.34<br>(3,931.49–4,772.48)    | 3,640.45<br>(3,266.41–4,103.30)    | 3,279.25<br>(2,914.31–3,756.32)    |
| Eastern Europe                                   | NCD        | 27,330.59<br>(24,975.05–29,932.77) | 33,287.44<br>(31,019.24–35,863.60) | 32,036.50<br>(29,703.29–34,680.73) | 32,395.67<br>(30,066.73–34,980.00) | 27,736.71<br>(25,333.35–30,319.78) | 25,505.00<br>(23,034.23–28,150.12) |
| Eastern Europe                                   | Injuries   | 6,363.58<br>(6,025.63–6,752.32)    | 9,114.89<br>(8,742.33–9,529.91)    | 8,439.94<br>(8,070.63–8,857.37)    | 8,009.59<br>(7,647.15–8,406.89)    | 5,623.23<br>(5,364.25–5,930.10)    | 4,977.06<br>(4,701.79–5,304.24)    |
| Belarus                                          | All causes | 35,330.39<br>(32,369.12–38,622.69) | 39,589.10<br>(36,679.38–42,790.48) | 39,697.86<br>(36,761.02–43,029.93) | 38,209.57<br>(35,395.58–41,420.20) | 34,963.17<br>(32,090.00–38,212.68) | 33,504.72<br>(30,485.83–36,771.00) |
| Belarus                                          | Group I    | 3,379.83<br>(2,907.70–3,943.47)    | 3,257.58<br>(2,799.20–3,800.38)    | 2,969.99<br>(2,586.17–3,445.79)    | 2,605.01<br>(2,246.59–3,055.31)    | 2,239.52<br>(1,883.16–2,655.91)    | 1,944.10<br>(1,607.37–2,347.60)    |
| Belarus                                          | NCD        | 26,094.25<br>(23,678.83–28,731.82) | 29,263.02<br>(26,945.09–31,866.65) | 29,555.82<br>(27,245.20–32,154.86) | 29,022.99<br>(26,706.00–31,584.15) | 27,048.27<br>(24,689.58–29,607.70) | 26,276.98<br>(23,757.42–28,924.71) |
| Belarus                                          | Injuries   | 5,856.32<br>(5,480.92–6,248.24)    | 7,068.50<br>(6,657.53–7,472.40)    | 7,172.05<br>(6,735.01–7,588.54)    | 6,581.58<br>(6,229.67–6,975.92)    | 5,675.37<br>(5,357.53–6,047.77)    | 5,283.64<br>(4,831.73–5,842.37)    |
| Estonia                                          | All causes | 36,114.95<br>(33,171.31–39,407.88) | 40,840.41<br>(37,926.99–44,087.94) | 35,251.32<br>(32,422.27–38,499.68) | 31,086.77<br>(28,322.96–34,228.78) | 25,005.12<br>(22,265.20–28,062.82) | 22,790.12<br>(20,030.09–25,758.97) |
| Estonia                                          | Group I    | 3,040.08<br>(2,711.21–3,436.71)    | 3,422.44<br>(3,087.64–3,807.72)    | 2,685.84<br>(2,395.44–3,065.54)    | 2,162.49<br>(1,881.63–2,546.50)    | 1,724.84<br>(1,437.98–2,074.15)    | 1,449.05<br>(1,174.66–1,795.47)    |
| Estonia                                          | NCD        | 25,915.40<br>(23,611.40–28,460.54) | 28,699.77<br>(26,407.66–31,254.23) | 26,292.66<br>(23,940.04–28,872.37) | 24,197.40<br>(21,876.63–26,839.42) | 20,361.04<br>(17,968.76–22,902.91) | 19,036.42<br>(16,613.09–21,566.40) |
| Estonia                                          | Injuries   | 7,159.46<br>(6,754.70–7,614.25)    | 8,718.20<br>(8,310.96–9,155.59)    | 6,272.82<br>(5,941.44–6,639.98)    | 4,726.89<br>(4,469.93–5,017.77)    | 2,919.25<br>(2,717.87–3,163.49)    | 2,304.65<br>(2,101.34–2,569.86)    |

**Appendix Table 4. Rate of DALYs per 100,000 individuals for all causes and level 1 cause groups by location for 1990 - 2015, both sexes combined.**

|                | Cause      | 1990                               | 1995                               | 2000                               | 2005                               | 2010                               | 2015                               |
|----------------|------------|------------------------------------|------------------------------------|------------------------------------|------------------------------------|------------------------------------|------------------------------------|
| Latvia         | All causes | 37,128.88<br>(34,240.49–40,408.22) | 43,359.43<br>(40,514.53–46,712.49) | 35,220.95<br>(32,364.19–38,468.26) | 33,621.30<br>(30,801.35–36,783.91) | 28,596.58<br>(25,860.68–31,649.37) | 26,262.14<br>(23,426.29–29,337.76) |
| Latvia         | Group I    | 3,133.32<br>(2,807.96–3,518.54)    | 3,631.57<br>(3,300.15–4,045.93)    | 2,868.68<br>(2,565.28–3,274.26)    | 2,470.74<br>(2,169.27–2,844.25)    | 2,140.66<br>(1,838.85–2,491.69)    | 1,840.10<br>(1,521.56–2,232.26)    |
| Latvia         | NCD        | 26,524.09<br>(24,201.91–29,074.18) | 30,222.51<br>(27,925.18–32,760.65) | 25,796.96<br>(23,425.09–28,384.11) | 25,621.40<br>(23,278.64–28,191.79) | 22,584.77<br>(20,241.48–25,073.92) | 21,147.71<br>(18,731.27–23,700.85) |
| Latvia         | Injuries   | 7,471.46<br>(7,085.56–7,915.11)    | 9,505.34<br>(9,066.55–9,962.47)    | 6,555.30<br>(6,239.84–6,938.53)    | 5,529.16<br>(5,235.16–5,853.84)    | 3,871.15<br>(3,651.42–4,136.17)    | 3,274.34<br>(3,052.43–3,550.58)    |
| Lithuania      | All causes | 33,615.43<br>(30,708.29–36,857.17) | 38,068.22<br>(35,192.03–41,358.28) | 32,578.07<br>(29,701.97–35,838.87) | 32,837.97<br>(30,060.70–36,016.21) | 28,995.85<br>(26,224.21–32,093.68) | 26,876.49<br>(24,135.93–29,958.76) |
| Lithuania      | Group I    | 2,427.20<br>(2,136.40–2,777.80)    | 2,787.78<br>(2,491.35–3,153.05)    | 2,373.36<br>(2,102.52–2,730.45)    | 2,252.26<br>(1,980.51–2,601.46)    | 1,935.88<br>(1,657.16–2,274.57)    | 1,679.77<br>(1,396.03–2,005.51)    |
| Lithuania      | NCD        | 24,524.34<br>(22,181.92–27,084.72) | 27,357.72<br>(25,043.79–29,951.65) | 23,856.22<br>(21,516.24–26,414.95) | 24,422.94<br>(22,133.84–26,973.06) | 22,343.88<br>(20,041.08–24,913.37) | 21,004.20<br>(18,570.08–23,563.38) |
| Lithuania      | Injuries   | 6,663.89<br>(6,309.92–7,061.69)    | 7,922.71<br>(7,582.97–8,315.01)    | 6,348.50<br>(6,034.30–6,728.84)    | 6,162.76<br>(5,891.32–6,483.37)    | 4,716.09<br>(4,483.15–5,009.49)    | 4,192.52<br>(3,955.55–4,476.74)    |
| Moldova        | All causes | 40,008.72<br>(36,968.11–43,463.10) | 46,066.90<br>(42,986.69–49,335.75) | 39,068.95<br>(36,008.38–42,270.66) | 36,248.60<br>(33,377.85–39,451.68) | 34,121.93<br>(31,322.32–37,247.09) | 28,336.23<br>(25,461.86–31,379.33) |
| Moldova        | Group I    | 4,888.31<br>(4,306.10–5,545.80)    | 5,780.91<br>(5,119.52–6,566.77)    | 5,584.09<br>(4,956.04–6,358.91)    | 3,837.38<br>(3,365.64–4,452.00)    | 3,578.72<br>(3,137.82–4,162.17)    | 2,713.09<br>(2,261.74–3,275.36)    |
| Moldova        | NCD        | 28,883.14<br>(26,591.80–31,509.01) | 33,634.57<br>(31,274.11–36,245.58) | 28,526.36<br>(26,179.33–31,134.56) | 28,242.92<br>(25,969.81–30,810.62) | 26,852.39<br>(24,590.55–29,413.94) | 22,780.76<br>(20,482.96–25,302.52) |
| Moldova        | Injuries   | 6,237.28<br>(5,827.25–6,659.93)    | 6,651.42<br>(6,266.94–7,073.35)    | 4,958.51<br>(4,648.36–5,327.71)    | 4,168.30<br>(3,916.19–4,453.45)    | 3,690.82<br>(3,480.50–3,939.71)    | 2,842.38<br>(2,632.61–3,091.90)    |
| Russia         | All causes | 38,399.54<br>(35,314.35–41,944.70) | 48,867.64<br>(45,816.01–52,417.92) | 47,367.50<br>(44,303.52–50,916.73) | 47,001.61<br>(43,969.06–50,447.05) | 38,489.05<br>(35,465.14–41,912.62) | 34,587.17<br>(31,511.30–38,035.96) |
| Russia         | Group I    | 4,210.49<br>(3,810.94–4,744.21)    | 4,732.21<br>(4,287.02–5,245.53)    | 4,938.82<br>(4,534.86–5,466.33)    | 4,573.45<br>(4,151.48–5,096.04)    | 3,877.10<br>(3,454.38–4,394.64)    | 3,567.86<br>(3,139.38–4,119.39)    |
| Russia         | NCD        | 27,585.88<br>(25,250.16–30,177.20) | 34,240.96<br>(31,965.89–36,848.45) | 33,186.67<br>(30,831.87–35,842.75) | 33,479.10<br>(31,159.80–36,073.37) | 28,352.98<br>(25,942.44–30,944.16) | 25,704.12<br>(23,226.78–28,418.76) |
| Russia         | Injuries   | 6,603.17<br>(6,234.29–7,018.94)    | 9,894.47<br>(9,473.43–10,374.02)   | 9,242.01<br>(8,821.04–9,738.18)    | 8,949.06<br>(8,503.18–9,411.38)    | 6,258.97<br>(5,958.11–6,603.30)    | 5,315.19<br>(5,014.94–5,670.64)    |
| Ukraine        | All causes | 36,162.31<br>(33,142.50–39,390.13) | 43,451.74<br>(40,597.69–46,705.65) | 41,684.35<br>(38,648.40–44,903.96) | 41,607.12<br>(38,774.54–44,759.20) | 34,412.12<br>(31,635.82–37,567.90) | 32,828.12<br>(29,825.64–35,974.82) |
| Ukraine        | Group I    | 3,457.40<br>(3,017.11–3,930.47)    | 3,879.30<br>(3,464.38–4,337.27)    | 4,276.59<br>(3,783.23–4,814.02)    | 4,166.99<br>(3,765.87–4,604.02)    | 3,451.82<br>(3,120.00–3,813.30)    | 2,903.32<br>(2,528.86–3,385.47)    |
| Ukraine        | NCD        | 27,042.18<br>(24,678.11–29,656.21) | 32,071.55<br>(29,716.05–34,699.09) | 30,558.81<br>(28,157.62–33,184.26) | 31,363.98<br>(28,989.11–33,965.68) | 26,939.59<br>(24,564.42–29,590.46) | 25,670.81<br>(23,202.98–28,432.50) |
| Ukraine        | Injuries   | 5,662.73<br>(5,347.74–6,001.20)    | 7,500.89<br>(7,144.61–7,879.58)    | 6,848.94<br>(6,525.93–7,202.59)    | 6,076.15<br>(5,773.91–6,389.63)    | 4,020.70<br>(3,783.54–4,293.98)    | 4,254.00<br>(3,785.92–4,769.05)    |
| Central Europe | All causes | 33,684.25<br>(30,914.13–36,830.20) | 33,233.41<br>(30,494.28–36,354.08) | 30,106.70<br>(27,403.93–33,186.81) | 27,710.39<br>(25,037.84–30,767.87) | 25,517.24<br>(22,885.54–28,528.36) | 23,528.44<br>(20,884.69–26,501.45) |
| Central Europe | Group I    | 3,855.77<br>(3,579.02–4,175.22)    | 3,289.29<br>(3,050.40–3,577.68)    | 2,747.63<br>(2,508.22–3,039.45)    | 2,260.58<br>(2,035.27–2,545.62)    | 1,865.77<br>(1,648.12–2,149.63)    | 1,602.52<br>(1,385.98–1,895.17)    |
| Central Europe | NCD        | 25,920.51<br>(23,645.65–28,446.74) | 25,745.66<br>(23,441.43–28,304.02) | 24,171.71<br>(21,893.03–26,733.88) | 22,702.43<br>(20,400.08–25,274.88) | 21,244.55<br>(18,938.73–23,775.60) | 19,806.84<br>(17,493.66–22,350.05) |
| Central Europe | Injuries   | 3,907.98<br>(3,656.17–4,204.59)    | 4,198.46<br>(3,911.37–4,505.40)    | 3,187.36<br>(2,977.00–3,436.89)    | 2,747.37<br>(2,569.59–2,969.47)    | 2,406.92<br>(2,248.74–2,603.63)    | 2,119.08<br>(1,969.63–2,311.48)    |
| Albania        | All causes | 31,188.70<br>(28,155.10–34,580.82) | 30,587.18<br>(27,572.74–34,034.03) | 28,532.97<br>(25,645.89–31,795.28) | 25,990.35<br>(23,149.89–29,191.74) | 24,053.93<br>(21,176.01–27,137.51) | 22,669.33<br>(19,813.75–25,895.33) |
| Albania        | Group I    | 7,413.91<br>(6,263.92–8,334.07)    | 6,438.76<br>(5,667.74–7,256.01)    | 4,690.55<br>(4,073.30–5,355.01)    | 3,498.83<br>(2,986.17–4,109.05)    | 2,659.97<br>(2,128.23–3,229.10)    | 2,183.08<br>(1,742.58–2,727.64)    |
| Albania        | NCD        | 20,925.90<br>(18,604.97–23,430.40) | 20,882.90<br>(18,565.34–23,412.40) | 20,893.88<br>(18,644.10–23,426.10) | 20,527.85<br>(18,243.35–23,237.57) | 19,722.97<br>(17,297.40–22,365.67) | 19,003.10<br>(16,521.27–21,763.63) |



**Appendix Table 4. Rate of DALYs per 100,000 individuals for all causes and level 1 cause groups by location for 1990 - 2015, both sexes combined.**

|                        | Cause      | 1990                               | 1995                               | 2000                               | 2005                               | 2010                               | 2015                               |
|------------------------|------------|------------------------------------|------------------------------------|------------------------------------|------------------------------------|------------------------------------|------------------------------------|
| Albania                | Injuries   | 2,848.89<br>(2,583.11–3,126.25)    | 3,265.51<br>(2,948.52–3,559.41)    | 2,948.55<br>(2,647.75–3,205.15)    | 1,963.67<br>(1,785.90–2,164.65)    | 1,670.99<br>(1,506.22–1,867.71)    | 1,483.15<br>(1,302.74–1,670.74)    |
| Bosnia and Herzegovina | All causes | 30,689.10<br>(27,964.36–33,763.75) | 45,009.34<br>(40,301.87–50,016.95) | 26,094.05<br>(23,455.20–29,168.50) | 23,958.84<br>(21,222.68–26,956.25) | 22,567.10<br>(19,963.55–25,537.86) | 21,369.35<br>(18,737.08–24,266.50) |
| Bosnia and Herzegovina | Group I    | 3,722.28<br>(3,350.30–4,176.03)    | 3,323.69<br>(2,936.48–3,772.80)    | 2,328.60<br>(2,038.92–2,669.71)    | 1,948.78<br>(1,679.75–2,257.75)    | 1,698.59<br>(1,445.42–2,013.96)    | 1,489.25<br>(1,217.23–1,801.66)    |
| Bosnia and Herzegovina | NCD        | 23,236.53<br>(20,919.71–25,635.25) | 23,274.07<br>(21,020.17–25,739.80) | 20,989.51<br>(18,743.04–23,487.00) | 19,689.04<br>(17,428.40–22,208.01) | 18,704.08<br>(16,485.02–21,193.68) | 17,925.54<br>(15,617.59–20,432.59) |
| Bosnia and Herzegovina | Injuries   | 3,730.29<br>(3,151.70–4,366.48)    | 18,411.58<br>(15,295.38–21,507.89) | 2,775.93<br>(2,470.69–3,131.24)    | 2,321.03<br>(2,077.23–2,638.54)    | 2,164.43<br>(1,933.51–2,458.62)    | 1,954.55<br>(1,721.40–2,230.76)    |
| Bulgaria               | All causes | 32,826.34<br>(30,110.01–35,870.27) | 33,570.57<br>(30,816.03–36,678.67) | 32,487.96<br>(29,776.18–35,548.16) | 30,283.45<br>(27,578.58–33,310.62) | 28,204.51<br>(25,531.96–31,192.80) | 26,500.14<br>(23,786.92–29,532.65) |
| Bulgaria               | Group I    | 3,431.14<br>(3,144.80–3,799.01)    | 3,197.37<br>(2,907.15–3,574.05)    | 3,151.70<br>(2,860.66–3,514.97)    | 2,517.02<br>(2,241.96–2,850.60)    | 2,271.01<br>(2,006.77–2,586.11)    | 1,883.72<br>(1,568.81–2,265.98)    |
| Bulgaria               | NCD        | 25,830.63<br>(23,617.64–28,367.34) | 26,730.84<br>(24,530.72–29,306.18) | 26,124.42<br>(23,923.67–28,619.67) | 25,067.25<br>(22,823.65–27,558.25) | 23,645.88<br>(21,391.31–26,129.69) | 22,544.15<br>(20,243.68–25,068.02) |
| Bulgaria               | Injuries   | 3,564.58<br>(3,274.64–3,888.58)    | 3,642.36<br>(3,368.99–3,959.45)    | 3,211.84<br>(2,956.26–3,503.11)    | 2,699.18<br>(2,478.04–2,951.25)    | 2,287.62<br>(2,096.71–2,526.39)    | 2,072.27<br>(1,886.71–2,304.72)    |
| Croatia                | All causes | 30,550.59<br>(27,854.47–33,744.67) | 30,163.58<br>(27,260.62–33,250.09) | 27,933.50<br>(25,197.51–30,977.91) | 25,335.79<br>(22,648.99–28,358.30) | 23,671.21<br>(21,042.04–26,752.40) | 22,254.10<br>(19,632.55–25,263.16) |
| Croatia                | Group I    | 2,493.44<br>(2,236.52–2,816.14)    | 2,333.34<br>(2,068.84–2,657.27)    | 2,099.12<br>(1,824.83–2,445.33)    | 1,724.51<br>(1,463.85–2,053.14)    | 1,520.53<br>(1,269.47–1,836.10)    | 1,350.42<br>(1,105.20–1,669.46)    |
| Croatia                | NCD        | 24,133.49<br>(21,880.90–26,666.88) | 23,287.73<br>(20,966.38–25,842.91) | 22,975.30<br>(20,668.25–25,529.66) | 21,194.36<br>(18,888.73–23,778.96) | 20,078.76<br>(17,809.08–22,671.44) | 19,066.91<br>(16,753.47–21,671.86) |
| Croatia                | Injuries   | 3,923.66<br>(3,648.04–4,251.71)    | 4,542.52<br>(3,616.61–5,564.76)    | 2,859.08<br>(2,665.04–3,088.57)    | 2,416.91<br>(2,250.28–2,611.97)    | 2,071.92<br>(1,921.51–2,251.88)    | 1,836.76<br>(1,694.62–2,012.18)    |
| Czech Republic         | All causes | 31,761.32<br>(29,069.20–34,892.76) | 28,742.34<br>(26,063.07–31,851.04) | 26,263.47<br>(23,582.84–29,301.85) | 24,270.45<br>(21,586.97–27,294.90) | 22,457.80<br>(19,818.67–25,459.41) | 20,876.32<br>(18,217.73–23,855.28) |
| Czech Republic         | Group I    | 2,194.61<br>(1,956.30–2,502.87)    | 1,880.07<br>(1,651.04–2,180.31)    | 1,672.10<br>(1,438.79–1,992.31)    | 1,574.20<br>(1,329.92–1,890.00)    | 1,469.28<br>(1,229.51–1,783.53)    | 1,313.85<br>(1,074.89–1,629.43)    |
| Czech Republic         | NCD        | 25,985.89<br>(23,752.14–28,554.81) | 23,621.99<br>(21,361.87–26,165.98) | 21,798.67<br>(19,559.68–24,307.25) | 20,253.06<br>(17,972.51–22,781.39) | 18,899.70<br>(16,619.03–21,410.35) | 17,786.46<br>(15,483.52–20,321.59) |
| Czech Republic         | Injuries   | 3,580.81<br>(3,305.99–3,883.24)    | 3,240.28<br>(3,007.09–3,512.24)    | 2,792.70<br>(2,586.73–3,029.67)    | 2,443.18<br>(2,260.55–2,658.45)    | 2,088.82<br>(1,934.40–2,283.31)    | 1,776.01<br>(1,626.70–1,957.46)    |
| Hungary                | All causes | 36,628.28<br>(33,805.58–39,709.54) | 35,294.20<br>(32,569.52–38,431.57) | 32,140.70<br>(29,388.41–35,206.45) | 29,666.96<br>(26,898.86–32,734.95) | 27,016.71<br>(24,287.46–30,055.94) | 24,079.43<br>(21,410.93–26,991.91) |
| Hungary                | Group I    | 2,913.06<br>(2,668.77–3,194.71)    | 2,374.71<br>(2,137.77–2,661.20)    | 2,086.88<br>(1,834.10–2,367.25)    | 1,716.23<br>(1,483.42–1,996.49)    | 1,476.04<br>(1,245.67–1,755.04)    | 1,354.55<br>(1,090.17–1,664.14)    |
| Hungary                | NCD        | 29,157.05<br>(26,771.44–31,749.31) | 28,965.40<br>(26,667.67–31,584.34) | 26,801.57<br>(24,449.48–29,407.14) | 25,201.01<br>(22,813.70–27,840.21) | 23,322.21<br>(20,924.82–25,908.71) | 20,903.19<br>(18,547.67–23,448.40) |
| Hungary                | Injuries   | 4,558.17<br>(4,294.40–4,845.19)    | 3,954.10<br>(3,708.45–4,228.46)    | 3,252.25<br>(3,042.74–3,478.18)    | 2,749.72<br>(2,572.12–2,949.64)    | 2,218.46<br>(2,069.81–2,391.84)    | 1,821.70<br>(1,670.39–1,994.15)    |
| Macedonia              | All causes | 32,492.44<br>(29,741.98–35,574.56) | 31,922.21<br>(29,323.51–34,892.08) | 29,632.74<br>(27,040.42–32,560.54) | 27,606.99<br>(24,947.62–30,619.98) | 25,345.97<br>(22,753.21–28,253.42) | 23,737.81<br>(20,971.84–26,642.36) |
| Macedonia              | Group I    | 5,699.92<br>(5,269.85–6,140.86)    | 4,245.91<br>(3,926.87–4,624.36)    | 2,796.75<br>(2,534.22–3,078.85)    | 2,373.03<br>(2,127.72–2,669.30)    | 1,897.03<br>(1,686.64–2,160.58)    | 1,810.28<br>(1,409.01–2,333.91)    |
| Macedonia              | NCD        | 24,186.43<br>(21,863.03–26,741.88) | 25,264.23<br>(22,949.83–27,815.63) | 24,699.78<br>(22,446.80–27,228.23) | 23,509.32<br>(21,175.32–26,114.28) | 21,917.05<br>(19,639.21–24,466.05) | 20,349.57<br>(17,946.24–22,977.55) |
| Macedonia              | Injuries   | 2,606.09<br>(2,358.81–2,900.20)    | 2,412.07<br>(2,181.84–2,687.84)    | 2,136.21<br>(1,953.56–2,351.50)    | 1,724.64<br>(1,567.67–1,908.34)    | 1,531.90<br>(1,390.09–1,698.81)    | 1,577.96<br>(1,420.76–1,742.28)    |
| Montenegro             | All causes | 27,893.21<br>(25,078.28–31,159.85) | 29,235.99<br>(26,467.14–32,368.58) | 29,862.55<br>(27,159.26–32,929.33) | 26,490.86<br>(23,842.56–29,460.40) | 24,053.40<br>(21,419.81–27,089.45) | 23,058.97<br>(20,334.49–26,101.43) |
| Montenegro             | Group I    | 3,438.24<br>(2,712.46–4,267.24)    | 3,077.49<br>(2,721.29–3,499.87)    | 3,550.32<br>(3,171.99–3,958.96)    | 2,234.01<br>(1,953.60–2,586.56)    | 1,741.47<br>(1,478.81–2,061.38)    | 1,495.57<br>(1,207.90–1,831.48)    |

**Appendix Table 4. Rate of DALYs per 100,000 individuals for all causes and level 1 cause groups by location for 1990 - 2015, both sexes combined.**

|              | Cause      | 1990                               | 1995                               | 2000                               | 2005                               | 2010                               | 2015                               |
|--------------|------------|------------------------------------|------------------------------------|------------------------------------|------------------------------------|------------------------------------|------------------------------------|
| Montenegro   | NCD        | 21,314.07<br>(19,069.00–23,862.47) | 22,856.68<br>(20,493.85–25,363.00) | 23,219.41<br>(21,016.36–25,764.79) | 21,642.99<br>(19,380.58–24,139.78) | 19,937.95<br>(17,684.46–22,477.07) | 19,427.09<br>(17,039.41–22,046.62) |
| Montenegro   | Injuries   | 3,140.90<br>(2,832.64–3,498.86)    | 3,301.82<br>(3,051.71–3,603.13)    | 3,092.82<br>(2,859.21–3,371.64)    | 2,613.86<br>(2,405.23–2,859.76)    | 2,373.99<br>(2,170.35–2,595.29)    | 2,136.31<br>(1,910.81–2,386.35)    |
| Poland       | All causes | 33,642.92<br>(30,915.73–36,747.84) | 31,699.99<br>(28,974.40–34,762.94) | 28,518.73<br>(25,846.87–31,565.36) | 26,386.06<br>(23,753.78–29,434.55) | 24,603.41<br>(22,001.54–27,576.98) | 22,758.31<br>(20,157.81–25,717.88) |
| Poland       | Group I    | 3,063.21<br>(2,833.63–3,364.73)    | 2,589.58<br>(2,372.67–2,862.10)    | 1,924.21<br>(1,730.64–2,179.78)    | 1,700.98<br>(1,513.29–1,953.94)    | 1,542.28<br>(1,352.34–1,801.86)    | 1,321.01<br>(1,099.33–1,587.78)    |
| Poland       | NCD        | 26,636.00<br>(24,364.48–29,273.19) | 25,416.30<br>(23,097.64–28,017.70) | 23,303.01<br>(20,999.52–25,912.45) | 21,707.99<br>(19,411.68–24,340.78) | 20,400.93<br>(18,104.41–22,950.76) | 19,089.47<br>(16,813.37–21,668.99) |
| Poland       | Injuries   | 3,943.72<br>(3,683.61–4,226.30)    | 3,694.11<br>(3,457.26–3,956.90)    | 3,291.52<br>(3,078.59–3,534.92)    | 2,977.09<br>(2,790.82–3,194.53)    | 2,660.20<br>(2,499.73–2,849.37)    | 2,347.84<br>(2,182.06–2,543.43)    |
| Romania      | All causes | 35,986.40<br>(33,198.03–39,147.95) | 36,847.24<br>(34,067.73–39,960.08) | 33,756.72<br>(31,007.56–36,872.71) | 30,912.66<br>(28,217.54–33,951.20) | 28,423.63<br>(25,740.62–31,440.48) | 26,048.34<br>(23,311.14–29,190.25) |
| Romania      | Group I    | 6,053.74<br>(5,351.08–6,476.71)    | 5,204.28<br>(4,773.72–5,595.86)    | 4,904.06<br>(4,457.56–5,290.82)    | 4,094.06<br>(3,530.05–4,252.65)    | 2,811.68<br>(2,521.03–3,176.78)    | 2,311.47<br>(1,959.73–2,742.48)    |
| Romania      | NCD        | 25,680.57<br>(23,418.01–28,133.09) | 27,447.25<br>(25,176.33–29,934.50) | 25,380.64<br>(23,123.61–27,846.82) | 24,019.06<br>(21,775.33–26,517.67) | 22,876.62<br>(20,588.28–25,339.00) | 21,375.76<br>(19,034.29–23,902.92) |
| Romania      | Injuries   | 4,252.09<br>(3,942.44–4,585.16)    | 4,195.71<br>(3,915.34–4,508.79)    | 3,472.02<br>(3,226.89–3,750.12)    | 3,016.30<br>(2,795.22–3,257.09)    | 2,735.33<br>(2,546.58–2,955.16)    | 2,361.10<br>(2,167.47–2,592.68)    |
| Serbia       | All causes | 30,916.91<br>(28,102.51–34,102.82) | 31,648.39<br>(28,939.48–34,578.33) | 31,167.50<br>(28,409.78–34,264.68) | 28,809.51<br>(26,131.22–31,855.27) | 26,181.05<br>(23,529.58–29,169.51) | 24,495.78<br>(21,838.34–27,500.27) |
| Serbia       | Group I    | 3,819.52<br>(3,275.47–4,424.83)    | 3,182.77<br>(2,887.97–3,521.25)    | 2,332.37<br>(2,072.81–2,641.73)    | 1,974.14<br>(1,737.11–2,269.33)    | 1,802.79<br>(1,577.50–2,073.50)    | 1,662.32<br>(1,432.62–1,954.42)    |
| Serbia       | NCD        | 23,862.81<br>(21,451.41–26,432.70) | 25,537.73<br>(23,180.56–28,071.09) | 25,785.51<br>(23,428.11–28,367.89) | 24,449.29<br>(22,067.99–27,040.73) | 22,303.06<br>(19,968.95–24,911.82) | 20,758.63<br>(18,423.36–23,325.12) |
| Serbia       | Injuries   | 3,234.57<br>(2,913.93–3,537.60)    | 2,927.89<br>(2,692.75–3,168.50)    | 3,049.62<br>(2,754.31–3,361.13)    | 2,386.08<br>(2,215.63–2,576.58)    | 2,075.20<br>(1,927.42–2,266.37)    | 2,074.84<br>(1,921.05–2,264.15)    |
| Slovakia     | All causes | 33,389.88<br>(30,644.20–36,499.99) | 30,622.20<br>(27,822.89–33,756.51) | 29,291.61<br>(26,593.01–32,308.74) | 27,431.29<br>(24,726.59–30,515.86) | 25,229.00<br>(22,563.32–28,259.86) | 22,747.31<br>(20,084.43–25,704.31) |
| Slovakia     | Group I    | 3,112.81<br>(2,802.93–3,466.86)    | 2,696.32<br>(2,413.38–3,024.25)    | 2,310.31<br>(2,053.73–2,613.36)    | 2,102.25<br>(1,855.77–2,420.25)    | 1,867.11<br>(1,621.77–2,183.42)    | 1,660.81<br>(1,398.94–1,976.74)    |
| Slovakia     | NCD        | 26,337.70<br>(24,048.15–28,832.30) | 24,578.93<br>(22,210.63–27,135.02) | 23,996.54<br>(21,718.76–26,539.79) | 22,730.06<br>(20,418.27–25,317.79) | 21,065.08<br>(18,769.56–23,605.16) | 19,103.44<br>(16,803.72–21,623.96) |
| Slovakia     | Injuries   | 3,939.38<br>(3,621.60–4,254.88)    | 3,346.95<br>(3,090.10–3,635.79)    | 2,984.77<br>(2,765.48–3,234.40)    | 2,598.97<br>(2,402.00–2,831.53)    | 2,296.80<br>(2,113.60–2,517.30)    | 1,983.06<br>(1,801.67–2,209.51)    |
| Slovenia     | All causes | 28,762.38<br>(25,995.54–31,857.03) | 27,102.54<br>(24,361.02–30,268.16) | 25,160.64<br>(22,446.49–28,213.10) | 22,817.71<br>(20,129.12–25,849.67) | 20,279.00<br>(17,599.93–23,253.78) | 18,733.69<br>(16,083.17–21,703.63) |
| Slovenia     | Group I    | 2,106.42<br>(1,827.84–2,446.05)    | 1,853.17<br>(1,585.73–2,196.69)    | 1,692.39<br>(1,429.89–2,007.09)    | 1,528.32<br>(1,264.30–1,864.93)    | 1,355.06<br>(1,099.22–1,691.68)    | 1,234.97<br>(990.34–1,564.77)      |
| Slovenia     | NCD        | 22,377.54<br>(20,095.83–24,857.91) | 21,407.18<br>(19,097.59–23,956.79) | 20,216.01<br>(17,895.92–22,733.25) | 18,559.99<br>(16,301.48–21,092.95) | 16,836.76<br>(14,540.17–19,362.04) | 15,770.48<br>(13,477.56–18,299.15) |
| Slovenia     | Injuries   | 4,278.42<br>(3,983.52–4,590.11)    | 3,842.19<br>(3,593.66–4,115.99)    | 3,252.24<br>(3,034.04–3,492.67)    | 2,729.40<br>(2,548.60–2,932.47)    | 2,087.18<br>(1,930.98–2,270.60)    | 1,728.24<br>(1,577.94–1,914.99)    |
| Central Asia | All causes | 42,844.52<br>(39,968.06–46,196.57) | 46,498.66<br>(43,551.71–49,666.30) | 43,628.55<br>(40,740.75–46,700.11) | 41,103.54<br>(38,297.00–44,213.56) | 36,689.94<br>(33,939.67–39,841.28) | 33,419.80<br>(30,598.60–36,491.89) |
| Central Asia | Group I    | 11,027.47<br>(10,470.20–11,665.47) | 11,472.03<br>(10,896.84–12,154.84) | 9,965.06<br>(9,399.71–10,571.96)   | 8,260.08<br>(7,663.08–8,916.62)    | 6,619.25<br>(6,102.95–7,190.77)    | 5,408.42<br>(4,890.81–5,929.98)    |
| Central Asia | NCD        | 26,990.97<br>(24,703.16–29,492.23) | 29,518.60<br>(27,199.78–31,991.20) | 29,060.17<br>(26,801.88–31,568.13) | 28,631.30<br>(26,393.08–31,167.38) | 26,395.87<br>(24,147.64–28,930.07) | 24,662.83<br>(22,444.62–27,178.14) |
| Central Asia | Injuries   | 4,826.08<br>(4,556.82–5,115.89)    | 5,508.03<br>(5,114.29–5,891.18)    | 4,603.32<br>(4,361.10–4,860.63)    | 4,212.15<br>(3,992.15–4,463.85)    | 3,674.83<br>(3,461.03–3,922.96)    | 3,348.54<br>(3,114.88–3,603.37)    |
| Armenia      | All causes | 36,882.82<br>(33,988.20–40,064.88) | 38,308.17<br>(35,418.91–41,506.27) | 33,945.48<br>(31,129.78–37,170.24) | 32,574.17<br>(29,779.51–35,682.35) | 30,254.96<br>(27,445.04–33,459.95) | 27,392.44<br>(24,587.74–30,471.43) |

**Appendix Table 4. Rate of DALYs per 100,000 individuals for all causes and level 1 cause groups by location for 1990 - 2015, both sexes combined.**

|            | Cause      | 1990                               | 1995                               | 2000                               | 2005                               | 2010                               | 2015                               |
|------------|------------|------------------------------------|------------------------------------|------------------------------------|------------------------------------|------------------------------------|------------------------------------|
| Armenia    | Group I    | 7,581.15<br>(6,947.61–8,241.11)    | 7,251.90<br>(6,565.37–7,989.99)    | 5,286.14<br>(4,711.71–5,920.75)    | 4,402.95<br>(3,849.01–4,991.43)    | 3,557.56<br>(2,962.21–4,131.73)    | 2,868.19<br>(2,342.30–3,439.04)    |
| Armenia    | NCD        | 24,087.62<br>(21,877.08–26,465.31) | 26,167.69<br>(23,829.42–28,601.04) | 25,058.13<br>(22,727.30–27,602.68) | 24,887.64<br>(22,658.75–27,349.76) | 23,620.40<br>(21,343.34–26,175.87) | 21,898.26<br>(19,700.13–24,457.86) |
| Armenia    | Injuries   | 5,214.05<br>(4,655.50–5,761.02)    | 4,888.58<br>(4,432.02–5,359.15)    | 3,601.21<br>(3,231.69–4,005.39)    | 3,283.58<br>(2,941.12–3,627.12)    | 3,077.00<br>(2,770.97–3,386.35)    | 2,625.99<br>(2,335.50–2,930.00)    |
| Azerbaijan | All causes | 46,868.99<br>(43,783.21–50,399.35) | 48,114.72<br>(44,599.19–51,621.31) | 43,753.72<br>(40,565.45–47,211.00) | 39,665.04<br>(36,399.34–43,099.71) | 35,602.63<br>(32,281.06–39,193.10) | 30,806.60<br>(27,619.15–34,308.00) |
| Azerbaijan | Group I    | 14,087.78<br>(12,815.76–15,501.57) | 14,334.93<br>(13,056.04–15,789.14) | 12,102.15<br>(11,053.36–13,299.78) | 9,672.40<br>(8,702.29–10,704.62)   | 7,245.95<br>(6,085.29–8,535.60)    | 5,607.42<br>(4,664.26–6,621.76)    |
| Azerbaijan | NCD        | 28,365.69<br>(26,051.82–30,884.34) | 29,041.48<br>(26,759.41–31,628.89) | 28,369.67<br>(25,952.82–31,036.76) | 27,139.84<br>(24,633.77–29,848.50) | 25,880.06<br>(23,521.31–28,625.27) | 22,839.72<br>(20,426.29–25,561.53) |
| Azerbaijan | Injuries   | 4,415.52<br>(4,052.87–4,772.99)    | 4,738.30<br>(4,323.76–5,125.86)    | 3,281.91<br>(2,985.43–3,615.95)    | 2,852.80<br>(2,584.00–3,143.39)    | 2,476.62<br>(2,210.24–2,767.63)    | 2,359.46<br>(2,081.81–2,676.64)    |
| Georgia    | All causes | 36,172.21<br>(33,235.11–39,343.45) | 34,606.89<br>(31,716.90–37,807.86) | 33,204.05<br>(30,319.12–36,328.21) | 32,181.92<br>(29,259.29–35,404.93) | 31,229.16<br>(28,319.59–34,389.03) | 30,310.51<br>(27,293.51–33,466.84) |
| Georgia    | Group I    | 7,716.75<br>(7,069.18–8,395.84)    | 7,560.63<br>(6,938.13–8,230.61)    | 6,823.33<br>(6,160.48–7,572.53)    | 5,382.14<br>(4,725.59–6,145.44)    | 4,389.58<br>(3,781.16–5,091.71)    | 3,685.75<br>(3,131.01–4,341.98)    |
| Georgia    | NCD        | 24,490.39<br>(22,095.97–27,042.09) | 23,638.59<br>(21,270.20–26,329.07) | 23,625.78<br>(21,365.47–26,122.80) | 24,044.89<br>(21,758.33–26,583.34) | 23,857.11<br>(21,535.87–26,431.13) | 23,468.41<br>(21,094.40–26,104.70) |
| Georgia    | Injuries   | 3,965.08<br>(3,631.84–4,329.23)    | 3,407.66<br>(3,086.19–3,724.54)    | 2,754.93<br>(2,472.93–3,107.29)    | 2,754.90<br>(2,501.58–3,031.78)    | 2,982.46<br>(2,743.97–3,257.75)    | 3,156.35<br>(2,874.86–3,464.09)    |
| Kazakhstan | All causes | 40,865.50<br>(37,949.88–44,290.41) | 50,500.04<br>(47,199.82–54,054.66) | 47,308.63<br>(44,290.60–50,761.71) | 46,256.38<br>(43,164.43–49,594.72) | 38,923.67<br>(35,904.21–42,249.10) | 35,613.20<br>(32,122.76–39,255.25) |
| Kazakhstan | Group I    | 7,765.11<br>(7,067.48–8,576.79)    | 8,821.26<br>(8,013.43–9,643.70)    | 7,735.79<br>(7,005.72–8,559.61)    | 6,636.18<br>(5,925.76–7,469.63)    | 5,165.86<br>(4,515.70–5,916.64)    | 4,319.25<br>(3,668.88–5,036.44)    |
| Kazakhstan | NCD        | 27,355.50<br>(25,136.24–29,898.88) | 32,846.58<br>(30,545.70–35,407.38) | 32,376.38<br>(30,131.21–34,950.41) | 32,603.14<br>(30,333.03–35,104.98) | 28,410.97<br>(26,190.19–30,940.88) | 26,424.36<br>(23,736.72–29,272.98) |
| Kazakhstan | Injuries   | 5,744.89<br>(5,467.34–6,045.41)    | 8,832.19<br>(7,673.19–9,990.67)    | 7,196.45<br>(6,864.37–7,526.62)    | 7,017.07<br>(6,724.19–7,335.25)    | 5,346.85<br>(5,091.34–5,644.95)    | 4,869.59<br>(4,490.29–5,281.53)    |
| Kyrgyzstan | All causes | 45,563.53<br>(42,617.93–48,958.38) | 47,080.99<br>(43,908.48–50,317.87) | 44,886.30<br>(41,796.39–48,080.30) | 43,020.07<br>(39,896.18–46,212.12) | 39,980.69<br>(37,095.60–43,381.41) | 36,034.20<br>(33,007.83–39,402.93) |
| Kyrgyzstan | Group I    | 11,916.53<br>(11,287.28–12,654.30) | 10,738.40<br>(10,137.95–11,389.24) | 9,865.01<br>(9,226.12–10,509.09)   | 8,449.11<br>(7,840.63–9,066.36)    | 7,232.12<br>(6,671.32–7,842.63)    | 6,114.46<br>(5,506.64–6,829.92)    |
| Kyrgyzstan | NCD        | 27,944.99<br>(25,612.86–30,412.52) | 30,858.74<br>(28,292.46–33,378.99) | 30,327.03<br>(27,940.00–32,862.07) | 30,449.28<br>(27,921.44–33,083.49) | 28,582.54<br>(26,234.84–31,153.10) | 26,567.42<br>(24,150.84–29,352.26) |
| Kyrgyzstan | Injuries   | 5,702.01<br>(5,253.88–6,097.27)    | 5,483.84<br>(5,060.09–5,850.22)    | 4,694.25<br>(4,377.98–5,001.03)    | 4,121.68<br>(3,854.05–4,435.03)    | 4,166.03<br>(3,923.57–4,458.91)    | 3,352.31<br>(3,090.47–3,668.70)    |
| Mongolia   | All causes | 53,277.19<br>(50,143.27–56,727.19) | 54,495.30<br>(51,386.27–57,906.80) | 52,553.00<br>(49,418.36–55,928.77) | 49,529.98<br>(46,173.73–52,936.73) | 45,600.34<br>(42,481.09–48,945.95) | 41,354.14<br>(38,136.48–44,899.45) |
| Mongolia   | Group I    | 15,586.55<br>(14,383.62–16,771.37) | 13,361.75<br>(12,299.71–14,399.97) | 10,805.51<br>(9,966.95–11,694.94)  | 8,348.29<br>(7,558.14–9,232.06)    | 6,582.43<br>(5,758.53–7,464.46)    | 5,099.49<br>(4,393.58–6,045.09)    |
| Mongolia   | NCD        | 32,254.53<br>(29,573.56–34,920.31) | 35,659.19<br>(33,108.72–38,252.41) | 36,224.34<br>(33,686.17–38,964.16) | 35,203.03<br>(32,566.51–37,900.48) | 33,074.23<br>(30,576.07–35,675.41) | 30,787.75<br>(28,114.25–33,473.42) |
| Mongolia   | Injuries   | 5,436.11<br>(4,930.24–5,916.90)    | 5,474.37<br>(4,963.23–5,951.60)    | 5,523.16<br>(5,020.50–5,970.92)    | 5,978.66<br>(5,290.64–6,495.90)    | 5,943.68<br>(5,129.18–6,439.96)    | 5,466.90<br>(4,768.74–5,983.86)    |
| Tajikistan | All causes | 47,413.34<br>(44,096.79–50,996.47) | 49,902.88<br>(46,427.64–53,672.23) | 45,861.12<br>(42,637.95–49,252.83) | 40,332.97<br>(37,335.01–43,634.00) | 35,775.35<br>(32,879.03–39,112.65) | 32,010.22<br>(28,862.12–35,393.94) |
| Tajikistan | Group I    | 16,758.50<br>(15,497.10–18,099.74) | 17,095.80<br>(15,745.11–18,536.99) | 14,232.74<br>(13,171.21–15,388.02) | 10,653.85<br>(9,768.86–11,633.43)  | 8,581.00<br>(7,775.42–9,415.65)    | 7,101.23<br>(6,116.62–8,175.42)    |
| Tajikistan | NCD        | 26,305.98<br>(23,924.31–28,926.52) | 27,713.54<br>(25,336.87–30,339.19) | 27,825.82<br>(25,464.55–30,361.97) | 26,604.60<br>(24,328.85–29,219.81) | 24,379.38<br>(22,087.44–26,989.99) | 22,365.74<br>(20,014.04–24,842.98) |
| Tajikistan | Injuries   | 4,348.86<br>(4,003.47–4,714.57)    | 5,093.54<br>(4,633.40–5,548.85)    | 3,802.56<br>(3,504.30–4,137.98)    | 3,074.52<br>(2,824.41–3,359.07)    | 2,814.97<br>(2,554.81–3,098.42)    | 2,543.25<br>(2,284.70–2,850.95)    |

**Appendix Table 4. Rate of DALYs per 100,000 individuals for all causes and level 1 cause groups by location for 1990 - 2015, both sexes combined.**

|                             | Cause      | 1990                               | 1995                               | 2000                               | 2005                               | 2010                               | 2015                               |
|-----------------------------|------------|------------------------------------|------------------------------------|------------------------------------|------------------------------------|------------------------------------|------------------------------------|
| Turkmenistan                | All causes | 49,833.15<br>(46,314.54–53,750.29) | 50,884.35<br>(47,290.65–54,728.91) | 49,725.50<br>(45,840.51–54,069.95) | 44,905.30<br>(41,188.69–48,948.30) | 39,807.79<br>(36,224.90–43,642.27) | 36,053.94<br>(32,841.62–39,695.55) |
| Turkmenistan                | Group I    | 16,252.64<br>(14,385.58–18,225.17) | 15,546.91<br>(13,613.93–17,669.14) | 14,341.99<br>(12,099.81–17,083.41) | 11,552.70<br>(9,349.46–13,991.98)  | 8,954.65<br>(7,186.18–10,971.37)   | 7,137.61<br>(5,758.60–8,848.14)    |
| Turkmenistan                | NCD        | 28,856.44<br>(26,596.64–31,287.99) | 30,772.23<br>(28,550.53–33,170.07) | 30,888.22<br>(28,638.88–33,351.47) | 29,388.56<br>(27,107.98–32,024.46) | 27,573.52<br>(25,273.97–30,356.16) | 26,022.63<br>(23,619.82–28,713.97) |
| Turkmenistan                | Injuries   | 4,724.07<br>(4,306.62–5,150.00)    | 4,565.21<br>(4,186.57–5,015.52)    | 4,495.28<br>(4,065.71–4,935.75)    | 3,964.04<br>(3,571.52–4,374.60)    | 3,279.62<br>(2,978.84–3,670.53)    | 2,893.70<br>(2,601.09–3,310.69)    |
| Uzbekistan                  | All causes | 41,201.32<br>(37,969.75–44,863.30) | 43,500.19<br>(40,272.64–47,055.76) | 41,287.31<br>(38,003.21–44,550.68) | 38,986.41<br>(35,704.79–42,559.56) | 35,367.47<br>(32,191.03–38,800.20) | 32,532.35<br>(29,448.34–36,069.50) |
| Uzbekistan                  | Group I    | 9,857.50<br>(8,962.92–10,810.46)   | 10,424.09<br>(9,575.38–11,412.03)  | 9,002.56<br>(8,124.88–10,012.56)   | 7,954.16<br>(6,927.38–9,224.22)    | 6,630.31<br>(5,689.57–7,773.11)    | 5,377.79<br>(4,540.77–6,336.63)    |
| Uzbekistan                  | NCD        | 27,130.61<br>(24,782.26–29,864.78) | 29,000.32<br>(26,570.27–31,571.40) | 28,425.24<br>(26,087.03–30,954.74) | 27,647.34<br>(25,248.68–30,279.87) | 25,572.48<br>(23,187.85–28,225.31) | 24,211.47<br>(21,874.16–26,892.78) |
| Uzbekistan                  | Injuries   | 4,213.21<br>(3,869.01–4,573.58)    | 4,075.78<br>(3,769.01–4,390.09)    | 3,859.52<br>(3,547.56–4,166.92)    | 3,384.90<br>(3,104.65–3,698.17)    | 3,164.69<br>(2,874.55–3,494.38)    | 2,943.09<br>(2,635.43–3,296.47)    |
| Latin America and Caribbean | All causes | 38,727.53<br>(35,846.93–42,021.86) | 36,239.15<br>(33,393.81–39,422.11) | 33,244.69<br>(30,381.75–36,419.09) | 30,872.15<br>(28,052.66–34,053.61) | 31,780.58<br>(28,416.85–35,474.01) | 27,917.02<br>(25,100.90–30,978.22) |
| Latin America and Caribbean | Group I    | 10,263.07<br>(9,829.88–10,772.75)  | 8,550.86<br>(8,187.31–9,002.11)    | 6,988.17<br>(6,632.84–7,419.48)    | 5,935.52<br>(5,580.92–6,379.31)    | 5,093.34<br>(4,728.29–5,543.17)    | 4,396.99<br>(4,034.09–4,850.92)    |
| Latin America and Caribbean | NCD        | 23,381.48<br>(20,912.19–25,979.64) | 22,905.42<br>(20,492.05–25,510.15) | 21,915.29<br>(19,525.99–24,566.41) | 20,977.32<br>(18,586.00–23,596.42) | 20,333.02<br>(17,912.34–22,948.17) | 19,980.76<br>(17,595.70–22,593.48) |
| Latin America and Caribbean | Injuries   | 5,082.98<br>(4,897.47–5,280.58)    | 4,782.86<br>(4,629.79–4,942.25)    | 4,341.23<br>(4,206.25–4,494.23)    | 3,959.30<br>(3,830.65–4,101.21)    | 6,354.21<br>(4,289.99–8,551.11)    | 3,539.27<br>(3,402.68–3,680.86)    |
| Central Latin America       | All causes | 35,014.04<br>(32,362.29–38,113.42) | 32,729.35<br>(30,030.86–35,744.21) | 30,222.31<br>(27,535.48–33,271.15) | 28,505.42<br>(25,869.82–31,542.93) | 27,505.13<br>(24,879.89–30,495.69) | 26,352.65<br>(23,689.94–29,361.04) |
| Central Latin America       | Group I    | 8,525.77<br>(8,200.64–8,954.61)    | 6,951.07<br>(6,616.73–7,367.00)    | 5,721.61<br>(5,387.56–6,135.44)    | 4,889.38<br>(4,563.15–5,307.33)    | 4,209.31<br>(3,882.09–4,629.22)    | 3,650.33<br>(3,327.28–4,059.66)    |
| Central Latin America       | NCD        | 21,436.07<br>(19,102.52–23,980.07) | 21,176.98<br>(18,876.34–23,744.47) | 20,333.05<br>(18,048.54–22,912.72) | 19,877.57<br>(17,601.63–22,463.23) | 19,561.91<br>(17,276.37–22,166.45) | 19,339.27<br>(17,014.01–21,927.92) |
| Central Latin America       | Injuries   | 5,052.20<br>(4,928.25–5,194.85)    | 4,601.30<br>(4,507.83–4,709.66)    | 4,167.65<br>(4,070.24–4,272.09)    | 3,738.48<br>(3,648.41–3,838.63)    | 3,733.91<br>(3,647.00–3,835.82)    | 3,363.05<br>(3,242.90–3,488.95)    |
| Colombia                    | All causes | 34,043.90<br>(31,432.62–37,149.38) | 33,047.27<br>(30,356.60–36,074.43) | 30,742.76<br>(28,076.51–33,786.85) | 27,699.01<br>(25,073.66–30,794.75) | 25,867.81<br>(23,142.21–28,878.45) | 23,743.62<br>(20,942.63–26,750.64) |
| Colombia                    | Group I    | 5,934.93<br>(5,549.98–6,381.43)    | 5,322.84<br>(4,922.81–5,774.05)    | 4,562.55<br>(4,197.09–5,001.52)    | 4,127.44<br>(3,761.67–4,596.20)    | 3,671.47<br>(3,202.66–4,218.12)    | 3,060.15<br>(2,572.47–3,647.59)    |
| Colombia                    | NCD        | 21,162.91<br>(18,844.17–23,781.90) | 20,737.20<br>(18,433.68–23,359.55) | 19,777.51<br>(17,468.14–22,419.28) | 18,854.76<br>(16,554.52–21,562.27) | 18,118.60<br>(15,764.70–20,742.48) | 17,199.21<br>(14,876.02–19,855.79) |
| Colombia                    | Injuries   | 6,946.06<br>(6,762.21–7,141.84)    | 6,987.23<br>(6,822.32–7,165.55)    | 6,402.70<br>(6,231.02–6,575.57)    | 4,716.82<br>(4,590.69–4,851.27)    | 4,077.74<br>(3,956.18–4,207.33)    | 3,484.25<br>(3,296.81–3,666.82)    |
| Costa Rica                  | All causes | 24,919.28<br>(22,286.94–27,900.27) | 24,715.23<br>(22,191.37–27,730.10) | 23,543.40<br>(20,905.45–26,614.74) | 22,103.48<br>(19,460.80–25,119.86) | 21,149.17<br>(18,457.99–24,123.97) | 20,491.36<br>(17,791.69–23,522.02) |
| Costa Rica                  | Group I    | 3,810.50<br>(3,364.93–4,361.75)    | 3,534.49<br>(3,089.72–4,070.44)    | 3,020.20<br>(2,612.17–3,567.70)    | 2,628.26<br>(2,253.04–3,103.63)    | 2,332.74<br>(1,958.34–2,789.86)    | 2,103.51<br>(1,733.46–2,588.40)    |
| Costa Rica                  | NCD        | 18,600.11<br>(16,356.93–21,184.77) | 18,597.20<br>(16,399.28–21,200.34) | 18,004.70<br>(15,757.69–20,619.68) | 17,156.19<br>(14,915.32–19,780.05) | 16,574.62<br>(14,293.60–19,113.29) | 16,336.06<br>(13,966.88–19,009.28) |
| Costa Rica                  | Injuries   | 2,508.67<br>(2,401.60–2,628.14)    | 2,583.55<br>(2,482.30–2,705.43)    | 2,518.49<br>(2,412.54–2,629.12)    | 2,319.03<br>(2,222.28–2,418.66)    | 2,241.80<br>(2,148.52–2,338.67)    | 2,051.79<br>(1,922.12–2,189.98)    |
| El Salvador                 | All causes | 42,403.01<br>(39,216.49–45,854.01) | 37,625.26<br>(34,493.21–40,885.76) | 34,134.55<br>(31,098.81–37,259.10) | 32,119.76<br>(29,212.75–35,590.08) | 30,311.39<br>(27,350.10–33,765.35) | 28,842.99<br>(25,621.06–32,280.40) |
| El Salvador                 | Group I    | 10,006.01<br>(9,189.15–10,914.07)  | 8,119.65<br>(7,360.97–8,897.67)    | 6,711.92<br>(6,031.36–7,423.02)    | 5,156.65<br>(4,552.88–5,902.48)    | 4,232.97<br>(3,588.92–5,027.58)    | 3,799.27<br>(3,205.58–4,535.51)    |
| El Salvador                 | NCD        | 23,661.41<br>(21,168.46–26,294.64) | 22,208.05<br>(19,724.47–24,820.99) | 20,721.80<br>(18,336.07–23,345.54) | 20,323.76<br>(17,987.36–23,048.44) | 19,929.04<br>(17,542.85–22,684.41) | 19,396.12<br>(16,916.46–22,222.78) |

**Appendix Table 4. Rate of DALYs per 100,000 individuals for all causes and level 1 cause groups by location for 1990 - 2015, both sexes combined.**

|                      | Cause      | 1990                               | 1995                               | 2000                               | 2005                               | 2010                               | 2015                               |
|----------------------|------------|------------------------------------|------------------------------------|------------------------------------|------------------------------------|------------------------------------|------------------------------------|
| El Salvador          | Injuries   | 8,735.60<br>(7,925.23–9,448.29)    | 7,297.57<br>(6,721.18–7,699.19)    | 6,700.83<br>(6,329.44–7,079.84)    | 6,639.35<br>(6,241.59–6,988.14)    | 6,149.38<br>(5,691.45–6,546.14)    | 5,647.60<br>(5,095.51–6,213.97)    |
| Guatemala            | All causes | 49,513.35<br>(46,347.60–52,964.69) | 44,304.48<br>(41,175.43–47,546.67) | 40,499.23<br>(37,355.04–43,891.39) | 38,376.41<br>(35,219.35–41,984.61) | 35,458.40<br>(32,169.40–39,021.98) | 32,906.61<br>(29,167.62–36,993.72) |
| Guatemala            | Group I    | 21,762.49<br>(20,722.21–22,905.59) | 16,753.78<br>(15,957.26–17,738.33) | 14,083.30<br>(13,271.21–15,018.35) | 11,607.02<br>(10,701.93–12,535.24) | 9,160.53<br>(8,278.38–10,148.70)   | 7,402.74<br>(6,520.75–8,345.62)    |
| Guatemala            | NCD        | 22,230.45<br>(19,798.45–24,835.15) | 22,222.85<br>(19,796.40–24,794.76) | 21,311.41<br>(18,969.30–23,967.35) | 21,159.90<br>(18,738.80–23,862.05) | 21,111.59<br>(18,732.41–23,787.75) | 20,707.50<br>(17,877.49–23,720.80) |
| Guatemala            | Injuries   | 5,520.41<br>(5,234.66–5,812.01)    | 5,327.84<br>(5,140.60–5,512.78)    | 5,104.52<br>(4,934.41–5,281.79)    | 5,609.49<br>(5,421.60–5,813.51)    | 5,186.29<br>(5,023.12–5,353.77)    | 4,796.37<br>(4,227.37–5,395.57)    |
| Honduras             | All causes | 38,040.17<br>(34,844.45–41,493.42) | 37,013.56<br>(33,399.99–41,103.96) | 35,885.26<br>(31,913.51–40,582.45) | 34,099.61<br>(29,811.62–39,029.03) | 32,466.35<br>(28,260.90–37,224.50) | 30,728.35<br>(26,593.67–35,422.04) |
| Honduras             | Group I    | 10,156.90<br>(9,415.27–10,946.30)  | 8,535.94<br>(7,869.52–9,338.29)    | 7,540.65<br>(6,861.51–8,323.58)    | 6,427.52<br>(5,784.24–7,168.56)    | 5,575.64<br>(4,970.18–6,232.34)    | 4,777.93<br>(4,186.45–5,403.17)    |
| Honduras             | NCD        | 24,040.34<br>(21,518.72–26,804.63) | 24,630.48<br>(21,937.48–27,724.98) | 24,141.74<br>(21,000.31–27,632.90) | 23,414.68<br>(20,112.94–26,994.83) | 22,499.39<br>(19,275.65–25,904.77) | 22,066.95<br>(18,938.22–25,435.16) |
| Honduras             | Injuries   | 3,842.93<br>(3,511.46–4,162.62)    | 3,847.14<br>(3,255.75–4,405.45)    | 4,202.87<br>(3,235.46–5,075.19)    | 4,257.41<br>(3,085.30–5,259.95)    | 4,391.33<br>(3,087.08–5,552.83)    | 3,883.46<br>(2,773.84–5,027.78)    |
| Mexico               | All causes | 34,349.05<br>(31,763.19–37,319.15) | 31,347.91<br>(28,782.82–34,259.46) | 28,563.07<br>(25,958.68–31,433.34) | 27,328.19<br>(24,749.32–30,121.95) | 26,845.47<br>(24,230.07–29,751.23) | 25,927.14<br>(23,324.55–28,788.99) |
| Mexico               | Group I    | 8,380.78<br>(8,079.42–8,710.76)    | 6,350.17<br>(6,076.10–6,663.87)    | 4,900.10<br>(4,664.65–5,190.84)    | 4,077.61<br>(3,845.97–4,354.65)    | 3,476.05<br>(3,251.42–3,747.73)    | 2,993.72<br>(2,768.10–3,268.91)    |
| Mexico               | NCD        | 21,453.92<br>(19,157.90–24,030.77) | 21,263.35<br>(18,968.33–23,851.39) | 20,564.12<br>(18,276.43–23,113.96) | 20,425.28<br>(18,146.09–22,967.65) | 20,294.33<br>(17,981.66–22,886.82) | 20,219.36<br>(17,912.00–22,797.52) |
| Mexico               | Injuries   | 4,514.35<br>(4,389.58–4,669.93)    | 3,734.40<br>(3,654.63–3,848.35)    | 3,098.85<br>(3,015.18–3,205.49)    | 2,825.30<br>(2,750.54–2,915.20)    | 3,075.08<br>(3,004.34–3,161.55)    | 2,714.05<br>(2,645.93–2,793.70)    |
| Nicaragua            | All causes | 33,814.47<br>(30,945.46–37,192.00) | 31,165.23<br>(28,223.12–34,335.95) | 28,145.31<br>(25,314.49–31,333.08) | 26,510.62<br>(23,722.22–29,703.81) | 25,082.88<br>(22,456.67–28,104.85) | 24,001.80<br>(21,059.00–27,255.92) |
| Nicaragua            | Group I    | 11,411.66<br>(10,680.49–12,142.31) | 9,112.77<br>(8,550.72–9,753.81)    | 6,827.56<br>(6,326.27–7,432.27)    | 5,289.26<br>(4,799.41–5,825.40)    | 4,204.22<br>(3,707.85–4,749.90)    | 3,479.82<br>(2,987.54–4,024.56)    |
| Nicaragua            | NCD        | 18,515.82<br>(16,084.87–21,101.25) | 18,562.10<br>(16,100.57–21,235.61) | 18,226.82<br>(15,880.45–20,887.97) | 18,414.66<br>(15,975.25–21,149.38) | 18,369.28<br>(16,030.06–21,034.41) | 18,172.70<br>(15,540.87–20,893.97) |
| Nicaragua            | Injuries   | 3,886.99<br>(3,634.70–4,159.06)    | 3,490.37<br>(3,218.49–3,740.84)    | 3,090.93<br>(2,881.10–3,304.66)    | 2,806.70<br>(2,612.82–2,991.59)    | 2,509.38<br>(2,349.59–2,692.91)    | 2,349.28<br>(2,112.02–2,611.64)    |
| Panama               | All causes | 28,230.19<br>(25,320.75–31,366.06) | 27,704.94<br>(24,768.76–31,016.88) | 26,236.29<br>(23,378.82–29,484.56) | 25,442.73<br>(22,630.34–28,555.20) | 25,385.82<br>(22,539.83–28,589.69) | 24,295.40<br>(21,162.21–27,745.50) |
| Panama               | Group I    | 5,420.93<br>(4,791.89–6,204.61)    | 5,154.93<br>(4,524.88–5,976.46)    | 4,906.25<br>(4,276.61–5,639.93)    | 4,924.04<br>(4,329.04–5,608.54)    | 4,631.23<br>(4,066.38–5,300.44)    | 4,126.13<br>(3,490.84–4,889.98)    |
| Panama               | NCD        | 19,441.22<br>(17,010.83–21,999.97) | 19,114.52<br>(16,651.78–21,914.22) | 18,193.99<br>(15,759.18–20,948.14) | 17,694.16<br>(15,270.98–20,364.25) | 17,575.97<br>(15,153.04–20,338.60) | 17,286.74<br>(14,707.55–20,199.16) |
| Panama               | Injuries   | 3,368.04<br>(3,115.26–3,615.89)    | 3,435.49<br>(3,180.07–3,681.00)    | 3,136.04<br>(2,905.62–3,370.65)    | 2,824.53<br>(2,591.02–3,050.77)    | 3,178.63<br>(2,914.58–3,433.97)    | 2,882.53<br>(2,501.31–3,285.40)    |
| Venezuela            | All causes | 31,915.27<br>(29,115.29–35,052.05) | 32,353.15<br>(29,307.12–35,662.95) | 31,146.48<br>(28,152.94–34,577.24) | 30,004.89<br>(26,986.71–33,436.65) | 29,663.38<br>(26,639.80–33,129.75) | 29,704.82<br>(26,000.73–33,616.19) |
| Venezuela            | Group I    | 6,452.11<br>(5,974.54–7,062.71)    | 6,707.42<br>(6,084.78–7,453.50)    | 6,107.59<br>(5,380.23–7,036.50)    | 5,540.87<br>(4,844.67–6,522.64)    | 5,163.66<br>(4,477.58–6,114.75)    | 4,982.85<br>(4,241.13–5,897.88)    |
| Venezuela            | NCD        | 21,562.81<br>(19,275.77–24,039.67) | 21,466.46<br>(19,121.35–23,984.22) | 20,411.68<br>(18,163.95–22,927.56) | 19,530.40<br>(17,232.26–22,052.69) | 19,255.76<br>(16,959.62–21,769.98) | 19,565.94<br>(16,883.66–22,371.90) |
| Venezuela            | Injuries   | 3,900.34<br>(3,758.85–4,047.53)    | 4,179.27<br>(4,020.31–4,331.13)    | 4,627.21<br>(4,486.61–4,765.49)    | 4,933.62<br>(4,799.95–5,071.91)    | 5,243.96<br>(5,105.91–5,382.99)    | 5,156.03<br>(4,548.44–5,799.85)    |
| Andean Latin America | All causes | 42,469.17<br>(39,374.14–45,904.99) | 37,688.20<br>(34,801.97–40,991.92) | 32,612.88<br>(29,746.62–35,712.98) | 28,967.26<br>(26,149.09–32,109.43) | 26,787.48<br>(24,001.47–29,892.84) | 25,032.27<br>(22,096.69–28,288.70) |
| Andean Latin America | Group I    | 14,903.65<br>(14,088.17–15,723.36) | 11,910.82<br>(11,337.40–12,552.09) | 9,006.97<br>(8,512.78–9,603.16)    | 7,197.31<br>(6,725.23–7,759.48)    | 5,871.57<br>(5,398.98–6,427.80)    | 4,920.53<br>(4,425.24–5,478.09)    |

**Appendix Table 4. Rate of DALYs per 100,000 individuals for all causes and level 1 cause groups by location for 1990 - 2015, both sexes combined.**

|                      | Cause      | 1990                               | 1995                               | 2000                               | 2005                               | 2010                               | 2015                               |
|----------------------|------------|------------------------------------|------------------------------------|------------------------------------|------------------------------------|------------------------------------|------------------------------------|
| Andean Latin America | NCD        | 22,340.65<br>(19,909.69–24,955.12) | 21,288.29<br>(18,909.05–23,933.20) | 19,736.65<br>(17,452.36–22,276.02) | 18,467.68<br>(16,142.59–21,023.32) | 17,817.64<br>(15,492.21–20,364.48) | 17,339.68<br>(14,870.89–19,976.55) |
| Andean Latin America | Injuries   | 5,224.87<br>(4,728.65–5,655.15)    | 4,569.10<br>(4,255.76–4,871.53)    | 3,869.25<br>(3,627.79–4,100.42)    | 3,302.28<br>(3,083.61–3,510.99)    | 3,098.27<br>(2,880.43–3,318.63)    | 2,772.05<br>(2,525.17–3,054.54)    |
| Bolivia              | All causes | 55,789.68<br>(52,099.23–59,719.16) | 49,079.11<br>(45,595.38–52,734.31) | 42,285.93<br>(38,879.75–45,875.49) | 36,983.77<br>(33,572.20–40,452.45) | 33,801.49<br>(30,012.59–37,863.46) | 31,467.35<br>(27,545.01–35,952.12) |
| Bolivia              | Group I    | 21,136.10<br>(19,802.46–22,414.87) | 17,133.93<br>(16,065.13–18,240.15) | 13,341.63<br>(12,515.48–14,114.66) | 10,451.95<br>(9,636.37–11,290.25)  | 8,487.96<br>(7,615.26–9,450.46)    | 6,986.09<br>(6,077.97–7,948.01)    |
| Bolivia              | NCD        | 26,511.79<br>(23,656.04–29,642.12) | 25,136.35<br>(22,434.35–27,888.58) | 23,298.43<br>(20,754.78–26,002.11) | 21,754.47<br>(19,147.03–24,364.00) | 21,041.01<br>(18,170.12–23,970.05) | 20,646.14<br>(17,699.81–23,782.51) |
| Bolivia              | Injuries   | 8,141.79<br>(6,971.55–9,256.06)    | 6,808.82<br>(6,051.66–7,539.30)    | 5,645.86<br>(5,233.78–6,117.60)    | 4,777.35<br>(4,346.09–5,262.63)    | 4,272.52<br>(3,772.94–4,879.37)    | 3,835.12<br>(3,288.84–4,575.68)    |
| Ecuador              | All causes | 35,922.09<br>(32,963.90–39,189.09) | 33,743.01<br>(30,896.46–36,927.96) | 31,858.35<br>(28,985.73–35,086.13) | 30,064.02<br>(27,108.58–33,401.68) | 28,230.82<br>(25,173.28–31,617.59) | 26,681.06<br>(23,473.89–30,280.15) |
| Ecuador              | Group I    | 10,308.22<br>(9,664.23–11,044.03)  | 8,824.55<br>(8,267.19–9,525.49)    | 7,623.48<br>(7,034.84–8,340.95)    | 6,388.03<br>(5,805.84–7,106.73)    | 5,207.11<br>(4,614.73–5,944.10)    | 4,421.10<br>(3,842.65–5,110.33)    |
| Ecuador              | NCD        | 21,030.65<br>(18,677.89–23,625.10) | 20,327.46<br>(17,988.53–22,955.74) | 20,039.46<br>(17,745.99–22,661.55) | 19,709.53<br>(17,339.06–22,363.17) | 19,227.90<br>(16,840.37–21,910.54) | 18,828.83<br>(16,318.66–21,733.42) |
| Ecuador              | Injuries   | 4,583.22<br>(4,343.29–4,854.48)    | 4,590.99<br>(4,327.04–4,865.19)    | 4,195.41<br>(3,911.72–4,483.19)    | 3,966.45<br>(3,675.47–4,249.93)    | 3,795.80<br>(3,483.81–4,084.36)    | 3,431.13<br>(3,102.27–3,795.25)    |
| Peru                 | All causes | 41,090.28<br>(37,897.56–44,553.49) | 35,836.68<br>(32,875.35–39,088.95) | 29,568.93<br>(26,692.94–32,682.76) | 25,592.66<br>(22,761.98–28,755.36) | 23,649.29<br>(20,947.31–26,674.12) | 22,018.67<br>(19,065.46–25,232.86) |
| Peru                 | Group I    | 14,879.34<br>(14,014.70–15,822.73) | 11,484.21<br>(10,832.28–12,201.63) | 8,016.67<br>(7,441.93–8,693.40)    | 6,320.79<br>(5,860.98–6,852.80)    | 5,200.85<br>(4,760.57–5,706.45)    | 4,388.95<br>(3,881.22–4,939.36)    |
| Peru                 | NCD        | 21,634.19<br>(19,128.92–24,320.10) | 20,529.56<br>(18,149.86–23,150.73) | 18,441.16<br>(16,069.68–21,027.72) | 16,814.66<br>(14,498.83–19,382.55) | 16,112.92<br>(13,789.67–18,619.32) | 15,563.65<br>(13,165.76–18,172.93) |
| Peru                 | Injuries   | 4,576.75<br>(4,032.42–5,079.65)    | 3,822.91<br>(3,400.03–4,220.64)    | 3,111.10<br>(2,834.67–3,349.09)    | 2,457.21<br>(2,247.99–2,646.71)    | 2,335.52<br>(2,135.62–2,528.60)    | 2,066.07<br>(1,837.17–2,334.92)    |
| Caribbean            | All causes | 42,500.68<br>(39,459.85–45,950.45) | 40,550.93<br>(37,502.84–44,002.82) | 37,740.16<br>(34,562.30–41,151.33) | 36,430.39<br>(33,406.07–39,905.42) | 66,234.79<br>(40,209.59–94,084.54) | 32,412.34<br>(29,115.90–36,029.94) |
| Caribbean            | Group I    | 13,374.78<br>(12,519.72–14,389.48) | 12,523.27<br>(11,680.79–13,439.73) | 11,382.99<br>(10,634.67–12,227.90) | 10,833.82<br>(10,141.67–11,617.28) | 9,231.96<br>(8,527.73–10,029.65)   | 7,616.87<br>(6,700.90–8,633.98)    |
| Caribbean            | NCD        | 24,551.78<br>(22,112.73–27,150.23) | 23,835.14<br>(21,426.38–26,509.36) | 22,657.98<br>(20,179.43–25,371.28) | 22,056.65<br>(19,585.20–24,814.13) | 21,842.26<br>(19,311.08–24,563.17) | 21,454.99<br>(18,925.23–24,221.44) |
| Caribbean            | Injuries   | 4,574.12<br>(4,020.97–4,973.66)    | 4,192.52<br>(3,771.10–4,526.74)    | 3,699.19<br>(3,346.33–3,986.97)    | 3,539.92<br>(3,202.64–3,819.36)    | 35,160.57<br>(9,501.29–63,575.45)  | 3,340.48<br>(3,026.74–3,669.46)    |
| Antigua and Barbuda  | All causes | 29,788.81<br>(26,683.68–33,106.55) | 30,029.72<br>(26,929.20–33,394.78) | 29,738.92<br>(26,699.42–33,108.99) | 27,965.00<br>(24,996.36–31,418.90) | 26,522.22<br>(23,623.67–29,951.40) | 25,627.25<br>(22,472.90–29,117.91) |
| Antigua and Barbuda  | Group I    | 4,748.82<br>(4,087.04–5,525.02)    | 5,165.27<br>(4,535.29–5,931.57)    | 5,438.66<br>(4,805.04–6,165.64)    | 4,326.71<br>(3,749.62–5,011.54)    | 3,859.55<br>(3,324.82–4,537.49)    | 3,658.84<br>(3,084.97–4,442.30)    |
| Antigua and Barbuda  | NCD        | 22,753.74<br>(20,189.28–25,514.54) | 22,619.13<br>(20,071.24–25,463.93) | 22,210.03<br>(19,617.17–24,959.22) | 21,544.48<br>(19,038.35–24,366.47) | 20,760.54<br>(18,204.39–23,619.16) | 20,266.41<br>(17,630.67–23,244.49) |
| Antigua and Barbuda  | Injuries   | 2,286.25<br>(2,106.07–2,494.66)    | 2,245.32<br>(2,068.01–2,463.30)    | 2,090.23<br>(1,907.37–2,289.39)    | 2,093.81<br>(1,935.73–2,262.25)    | 1,902.13<br>(1,729.34–2,076.01)    | 1,702.00<br>(1,509.05–1,914.96)    |
| The Bahamas          | All causes | 39,852.11<br>(36,142.27–43,965.00) | 37,649.90<br>(34,235.47–41,359.99) | 36,458.89<br>(33,117.08–40,151.74) | 33,739.13<br>(30,483.68–37,356.22) | 32,174.35<br>(28,806.29–35,912.86) | 30,253.67<br>(26,685.41–34,150.05) |
| The Bahamas          | Group I    | 7,801.38<br>(6,363.62–9,398.71)    | 7,416.66<br>(6,548.39–8,460.32)    | 7,381.38<br>(6,527.79–8,295.85)    | 6,503.75<br>(5,573.77–7,630.78)    | 6,114.04<br>(5,177.55–7,254.25)    | 6,104.79<br>(4,002.06–6,640.40)    |
| The Bahamas          | NCD        | 27,645.08<br>(25,028.75–30,570.44) | 26,152.55<br>(23,559.74–29,020.44) | 25,167.77<br>(22,438.20–28,022.58) | 23,526.98<br>(20,926.62–26,366.95) | 22,368.45<br>(19,706.37–25,188.56) | 22,028.65<br>(19,278.23–24,828.77) |
| The Bahamas          | Injuries   | 4,405.65<br>(4,045.34–4,796.38)    | 4,080.69<br>(3,708.54–4,500.75)    | 3,909.74<br>(3,465.06–4,410.84)    | 3,708.40<br>(3,311.46–4,116.25)    | 3,691.86<br>(3,230.98–4,153.84)    | 3,214.23<br>(2,763.93–3,677.59)    |
| Barbados             | All causes | 31,146.02<br>(27,670.55–34,722.93) | 30,573.56<br>(27,179.93–34,368.00) | 29,529.04<br>(26,210.94–33,063.10) | 28,073.24<br>(24,931.24–31,551.29) | 27,573.46<br>(24,463.19–30,804.80) | 26,889.10<br>(23,389.38–30,723.66) |

**Appendix Table 4. Rate of DALYs per 100,000 individuals for all causes and level 1 cause groups by location for 1990 - 2015, both sexes combined.**

|                    | Cause      | 1990                               | 1995                               | 2000                               | 2005                               | 2010                               | 2015                               |
|--------------------|------------|------------------------------------|------------------------------------|------------------------------------|------------------------------------|------------------------------------|------------------------------------|
| Barbados           | Group I    | 5,588.81<br>(4,477.87–6,894.12)    | 5,443.17<br>(4,437.48–6,704.25)    | 5,795.44<br>(4,848.81–6,953.27)    | 4,897.48<br>(4,141.76–5,820.35)    | 4,532.74<br>(3,763.34–5,458.23)    | 4,159.09<br>(3,262.48–5,389.27)    |
| Barbados           | NCD        | 23,255.77<br>(20,743.48–25,965.51) | 22,998.47<br>(20,393.19–25,872.03) | 21,748.26<br>(19,202.50–24,613.41) | 21,028.40<br>(18,389.55–23,908.28) | 20,951.58<br>(18,414.40–23,798.56) | 20,736.75<br>(17,930.46–23,672.97) |
| Barbados           | Injuries   | 2,301.44<br>(2,144.94–2,474.55)    | 2,131.92<br>(1,981.65–2,296.13)    | 1,985.35<br>(1,820.89–2,148.24)    | 2,147.36<br>(2,007.19–2,297.15)    | 2,089.15<br>(1,923.24–2,259.44)    | 1,993.27<br>(1,747.55–2,238.31)    |
| Belize             | All causes | 34,629.08<br>(31,438.98–38,219.88) | 35,491.94<br>(32,417.44–38,969.32) | 38,360.60<br>(35,269.96–41,784.81) | 36,376.68<br>(33,205.93–39,938.69) | 33,900.27<br>(30,815.56–37,201.74) | 32,947.84<br>(29,130.75–36,644.99) |
| Belize             | Group I    | 7,989.58<br>(7,064.26–8,966.14)    | 6,848.15<br>(6,081.57–7,796.88)    | 7,339.79<br>(6,599.35–8,215.61)    | 6,961.11<br>(6,232.87–7,790.09)    | 6,218.09<br>(5,418.11–7,269.48)    | 5,913.99<br>(4,861.35–7,309.39)    |
| Belize             | NCD        | 22,799.70<br>(20,305.37–25,436.14) | 24,562.66<br>(22,117.48–27,217.32) | 26,017.48<br>(23,538.32–28,682.49) | 24,771.84<br>(22,224.32–27,656.69) | 23,328.08<br>(20,731.26–26,103.11) | 23,035.56<br>(20,088.51–25,946.99) |
| Belize             | Injuries   | 3,839.80<br>(3,515.13–4,196.50)    | 4,081.12<br>(3,767.68–4,412.08)    | 5,003.33<br>(4,570.86–5,467.68)    | 4,643.73<br>(4,260.06–5,060.74)    | 4,354.10<br>(3,853.50–4,770.38)    | 3,998.29<br>(3,383.29–4,560.24)    |
| Bermuda            | All causes | 33,844.41<br>(30,867.27–37,017.95) | 31,306.59<br>(28,352.75–34,429.51) | 28,509.63<br>(25,577.44–31,823.19) | 25,377.96<br>(22,471.62–28,540.48) | 23,572.76<br>(20,761.06–26,738.32) | 22,558.70<br>(19,748.14–25,656.21) |
| Bermuda            | Group I    | 3,665.51<br>(3,234.92–4,210.76)    | 3,742.09<br>(3,317.80–4,274.26)    | 3,895.49<br>(3,498.50–4,380.98)    | 2,997.13<br>(2,606.66–3,488.59)    | 2,673.15<br>(2,287.91–3,129.71)    | 2,478.66<br>(2,080.33–2,974.07)    |
| Bermuda            | NCD        | 26,988.35<br>(24,535.80–29,613.49) | 24,947.48<br>(22,401.57–27,486.12) | 22,577.28<br>(20,063.07–25,277.71) | 20,316.60<br>(17,847.68–23,022.64) | 19,071.23<br>(16,651.17–21,673.16) | 18,519.32<br>(16,093.92–21,164.91) |
| Bermuda            | Injuries   | 3,190.56<br>(2,979.98–3,425.95)    | 2,617.02<br>(2,428.50–2,811.66)    | 2,036.86<br>(1,818.89–2,227.11)    | 2,064.25<br>(1,885.76–2,258.09)    | 1,828.38<br>(1,648.12–2,030.58)    | 1,560.72<br>(1,359.34–1,764.24)    |
| Cuba               | All causes | 27,874.62<br>(25,148.95–30,979.27) | 27,183.01<br>(24,441.81–30,334.67) | 25,377.35<br>(22,685.80–28,497.17) | 23,962.86<br>(21,243.14–27,095.73) | 23,067.89<br>(20,387.91–26,059.71) | 22,713.26<br>(20,007.09–25,749.06) |
| Cuba               | Group I    | 3,512.32<br>(3,118.25–4,030.64)    | 3,214.33<br>(2,826.62–3,725.84)    | 2,847.53<br>(2,480.79–3,328.30)    | 2,597.69<br>(2,245.53–3,064.75)    | 2,482.29<br>(2,128.07–2,927.14)    | 2,424.24<br>(2,063.65–2,875.83)    |
| Cuba               | NCD        | 20,557.07<br>(18,269.71–23,070.19) | 20,454.65<br>(18,210.91–22,959.25) | 19,729.73<br>(17,431.85–22,263.92) | 19,110.95<br>(16,815.58–21,671.96) | 18,575.42<br>(16,306.09–21,115.00) | 18,318.75<br>(16,053.41–20,865.75) |
| Cuba               | Injuries   | 3,805.23<br>(3,641.20–3,985.99)    | 3,514.03<br>(3,355.04–3,688.03)    | 2,800.09<br>(2,664.31–2,959.10)    | 2,254.22<br>(2,135.72–2,396.52)    | 2,010.18<br>(1,896.61–2,148.60)    | 1,970.26<br>(1,844.67–2,122.08)    |
| Dominica           | All causes | 31,853.27<br>(28,590.45–35,541.35) | 31,961.60<br>(28,662.85–35,615.93) | 30,663.99<br>(27,359.34–34,131.74) | 30,191.66<br>(26,937.30–33,740.31) | 31,056.18<br>(27,600.80–34,798.15) | 31,930.50<br>(27,931.75–36,124.40) |
| Dominica           | Group I    | 5,695.12<br>(4,794.85–6,678.10)    | 5,616.96<br>(4,803.96–6,516.22)    | 5,568.33<br>(4,781.04–6,420.76)    | 5,412.50<br>(4,629.95–6,357.32)    | 5,466.57<br>(4,569.04–6,653.71)    | 5,539.52<br>(4,367.02–7,024.75)    |
| Dominica           | NCD        | 23,816.28<br>(21,260.22–26,826.97) | 23,961.20<br>(21,336.18–26,931.80) | 22,699.80<br>(20,053.68–25,560.89) | 22,237.89<br>(19,627.17–25,073.33) | 22,825.98<br>(20,076.38–25,822.01) | 23,608.17<br>(20,644.13–26,763.23) |
| Dominica           | Injuries   | 2,341.88<br>(2,145.14–2,565.26)    | 2,383.44<br>(2,186.18–2,599.02)    | 2,395.87<br>(2,186.45–2,610.12)    | 2,541.27<br>(2,315.91–2,769.17)    | 2,763.63<br>(2,484.54–3,012.56)    | 2,782.81<br>(2,441.05–3,153.42)    |
| Dominican Republic | All causes | 35,345.41<br>(32,371.85–38,671.93) | 33,362.03<br>(30,450.17–36,595.86) | 31,997.76<br>(29,040.70–35,321.88) | 31,975.84<br>(29,117.42–35,253.15) | 29,824.31<br>(26,922.95–33,105.26) | 28,186.55<br>(25,249.91–31,494.26) |
| Dominican Republic | Group I    | 11,256.74<br>(10,451.54–12,054.16) | 9,678.21<br>(8,956.40–10,485.19)   | 9,307.17<br>(8,418.25–10,299.94)   | 9,324.77<br>(8,511.92–10,217.61)   | 7,334.02<br>(6,601.62–8,146.03)    | 5,869.07<br>(5,054.50–6,659.14)    |
| Dominican Republic | NCD        | 20,698.89<br>(18,199.08–23,317.10) | 20,501.24<br>(18,074.83–23,143.18) | 19,504.54<br>(17,098.96–22,173.02) | 19,346.59<br>(16,933.59–21,959.92) | 19,276.95<br>(16,882.22–21,925.14) | 19,256.56<br>(16,937.51–21,865.31) |
| Dominican Republic | Injuries   | 3,389.78<br>(3,150.85–3,685.43)    | 3,182.58<br>(2,937.38–3,435.89)    | 3,186.05<br>(2,964.09–3,429.39)    | 3,304.48<br>(3,072.75–3,523.63)    | 3,213.35<br>(2,902.81–3,457.56)    | 3,060.92<br>(2,817.36–3,347.19)    |
| Grenada            | All causes | 37,112.93<br>(33,267.27–41,116.99) | 35,069.69<br>(31,624.04–38,637.02) | 35,383.68<br>(32,056.27–39,124.29) | 36,022.72<br>(32,833.80–39,857.94) | 34,682.86<br>(31,416.84–38,438.95) | 33,914.54<br>(30,282.21–37,865.29) |
| Grenada            | Group I    | 7,164.35<br>(5,676.71–8,963.85)    | 5,894.29<br>(4,936.82–6,955.26)    | 5,912.04<br>(5,049.10–7,006.17)    | 5,494.49<br>(4,633.67–6,435.23)    | 5,111.87<br>(4,301.92–6,129.39)    | 5,000.74<br>(4,010.27–6,340.73)    |
| Grenada            | NCD        | 26,868.83<br>(24,212.36–29,621.78) | 26,250.45<br>(23,701.29–29,075.04) | 26,224.56<br>(23,657.35–29,077.49) | 26,855.88<br>(24,232.79–29,817.07) | 26,201.10<br>(23,622.17–29,124.16) | 25,865.56<br>(22,954.69–28,914.16) |
| Grenada            | Injuries   | 3,079.75<br>(2,818.61–3,367.87)    | 2,924.95<br>(2,713.62–3,155.08)    | 3,247.08<br>(3,013.00–3,505.55)    | 3,672.36<br>(3,323.56–4,040.49)    | 3,369.89<br>(3,036.79–3,691.60)    | 3,048.24<br>(2,662.72–3,408.23)    |

**Appendix Table 4. Rate of DALYs per 100,000 individuals for all causes and level 1 cause groups by location for 1990 - 2015, both sexes combined.**

|                                  | Cause      | 1990                               | 1995                               | 2000                               | 2005                               | 2010                                 | 2015                               |
|----------------------------------|------------|------------------------------------|------------------------------------|------------------------------------|------------------------------------|--------------------------------------|------------------------------------|
| Guyana                           | All causes | 49,736.86<br>(46,248.06–53,524.10) | 50,345.81<br>(46,986.84–54,020.94) | 49,417.01<br>(45,783.23–53,185.42) | 48,956.27<br>(45,309.94–52,950.97) | 46,345.01<br>(42,692.11–50,075.61)   | 43,471.79<br>(39,470.09–47,859.70) |
| Guyana                           | Group I    | 12,489.80<br>(11,629.05–13,421.21) | 12,011.31<br>(11,194.22–12,843.06) | 12,547.09<br>(11,638.99–13,594.53) | 11,841.63<br>(10,806.48–13,391.70) | 11,210.30<br>(9,884.33–12,927.44)    | 9,924.61<br>(8,546.85–11,532.59)   |
| Guyana                           | NCD        | 31,835.94<br>(29,205.33–34,692.20) | 32,856.39<br>(30,248.52–35,741.10) | 30,913.39<br>(28,072.13–33,906.62) | 30,813.82<br>(28,095.36–33,978.90) | 29,444.47<br>(26,607.26–32,479.63)   | 28,245.68<br>(25,203.93–31,545.50) |
| Guyana                           | Injuries   | 5,411.12<br>(5,067.68–5,897.31)    | 5,478.12<br>(5,125.12–5,943.85)    | 5,956.53<br>(5,480.08–6,463.38)    | 6,300.82<br>(5,606.21–6,977.48)    | 5,690.24<br>(4,994.31–6,396.49)      | 5,301.50<br>(4,475.83–6,128.84)    |
| Haiti                            | All causes | 77,399.46<br>(72,188.75–82,745.61) | 71,553.64<br>(66,595.47–76,950.68) | 64,334.20<br>(58,674.58–70,013.33) | 60,660.98<br>(55,279.69–66,915.40) | 184,678.51<br>(81,528.43–298,980.40) | 50,396.58<br>(43,716.34–57,379.48) |
| Haiti                            | Group I    | 32,012.31<br>(29,383.22–35,232.93) | 30,923.61<br>(28,104.93–34,049.36) | 27,662.29<br>(25,148.75–30,371.81) | 25,292.65<br>(23,251.84–27,407.72) | 20,101.36<br>(18,185.60–22,207.62)   | 15,642.26<br>(13,192.04–18,563.78) |
| Haiti                            | NCD        | 37,506.05<br>(34,137.22–41,279.17) | 34,036.97<br>(30,181.83–37,863.90) | 31,191.22<br>(27,221.60–35,350.09) | 30,313.91<br>(26,128.75–34,918.34) | 30,598.50<br>(26,175.03–34,991.40)   | 29,567.75<br>(25,084.97–34,214.80) |
| Haiti                            | Injuries   | 7,881.10<br>(5,818.47–9,362.43)    | 6,593.06<br>(5,102.41–7,757.15)    | 5,480.69<br>(4,373.38–6,489.23)    | 5,054.42<br>(3,993.33–6,052.76)    | 133,978.65<br>(30,140.09–248,852.87) | 5,186.57<br>(4,026.97–6,423.35)    |
| Jamaica                          | All causes | 28,990.25<br>(25,852.81–32,606.99) | 29,045.97<br>(25,851.87–32,652.90) | 29,757.99<br>(26,578.87–33,297.51) | 28,621.15<br>(25,351.74–32,308.14) | 28,985.38<br>(25,551.10–32,523.48)   | 28,671.95<br>(25,092.94–32,670.40) |
| Jamaica                          | Group I    | 5,877.53<br>(4,943.88–6,966.93)    | 5,504.20<br>(4,617.89–6,652.38)    | 5,717.04<br>(4,829.00–6,777.41)    | 5,347.66<br>(4,454.64–6,534.86)    | 5,134.91<br>(4,135.30–6,233.22)      | 4,735.75<br>(3,751.86–5,996.91)    |
| Jamaica                          | NCD        | 21,603.88<br>(19,132.88–24,398.34) | 21,589.29<br>(19,129.82–24,426.39) | 21,769.14<br>(19,273.65–24,535.68) | 20,539.47<br>(17,985.97–23,309.62) | 21,220.46<br>(18,593.54–23,973.96)   | 21,471.28<br>(18,592.93–24,558.39) |
| Jamaica                          | Injuries   | 1,508.84<br>(1,371.69–1,709.31)    | 1,952.49<br>(1,743.22–2,137.37)    | 2,271.81<br>(1,961.90–2,484.60)    | 2,734.03<br>(2,183.03–3,030.84)    | 2,630.00<br>(1,961.21–2,908.64)      | 2,464.93<br>(1,876.79–2,818.87)    |
| Puerto Rico                      | All causes | 30,287.47<br>(27,392.31–33,548.61) | 31,020.61<br>(28,160.76–34,278.63) | 27,543.33<br>(24,683.40–30,796.97) | 26,073.78<br>(23,219.31–29,354.90) | 25,198.50<br>(22,426.09–28,331.65)   | 23,566.73<br>(20,714.34–26,713.40) |
| Puerto Rico                      | Group I    | 5,147.85<br>(4,791.56–5,613.44)    | 5,592.12<br>(5,240.61–6,049.22)    | 3,993.53<br>(3,644.55–4,451.81)    | 3,465.00<br>(3,130.80–3,901.43)    | 3,027.37<br>(2,697.70–3,430.07)      | 2,714.72<br>(2,381.41–3,148.45)    |
| Puerto Rico                      | NCD        | 21,406.04<br>(18,954.21–24,110.26) | 21,560.72<br>(19,191.03–24,309.14) | 20,382.03<br>(17,971.46–23,102.14) | 19,683.58<br>(17,223.04–22,472.04) | 19,220.82<br>(16,833.70–21,930.31)   | 18,276.07<br>(15,766.17–21,024.52) |
| Puerto Rico                      | Injuries   | 3,733.59<br>(3,573.17–3,893.98)    | 3,867.76<br>(3,702.39–4,031.42)    | 3,167.77<br>(3,031.38–3,313.17)    | 2,925.20<br>(2,804.26–3,069.34)    | 2,950.32<br>(2,838.62–3,082.25)      | 2,575.95<br>(2,389.97–2,767.01)    |
| Saint Lucia                      | All causes | 37,024.69<br>(33,239.70–41,535.70) | 34,722.53<br>(31,321.94–38,399.85) | 32,955.23<br>(29,709.15–36,595.09) | 31,335.94<br>(28,088.53–35,114.53) | 29,400.76<br>(26,081.62–32,963.36)   | 28,740.44<br>(25,197.04–32,739.87) |
| Saint Lucia                      | Group I    | 7,575.75<br>(5,981.31–9,454.97)    | 6,007.17<br>(5,075.05–7,134.00)    | 5,488.64<br>(4,647.49–6,417.55)    | 5,083.95<br>(4,178.04–6,215.73)    | 4,710.59<br>(3,817.87–5,812.99)      | 4,247.01<br>(3,238.82–5,716.63)    |
| Saint Lucia                      | NCD        | 26,250.57<br>(23,665.07–29,051.24) | 25,646.23<br>(23,072.92–28,384.44) | 24,437.91<br>(21,868.82–27,314.67) | 23,161.57<br>(20,622.79–26,013.57) | 21,685.67<br>(19,177.69–24,399.94)   | 21,840.38<br>(19,186.07–24,795.72) |
| Saint Lucia                      | Injuries   | 3,198.37<br>(2,915.90–3,502.14)    | 3,069.13<br>(2,847.37–3,307.96)    | 3,028.68<br>(2,788.44–3,263.32)    | 3,090.42<br>(2,881.10–3,328.32)    | 3,004.50<br>(2,801.51–3,220.75)      | 2,653.05<br>(2,375.02–2,972.57)    |
| Saint Vincent and the Grenadines | All causes | 37,614.76<br>(33,887.59–41,758.60) | 37,836.38<br>(34,282.67–41,602.63) | 38,696.53<br>(35,297.43–42,485.09) | 36,115.76<br>(32,852.56–39,751.45) | 34,975.79<br>(31,724.96–38,548.46)   | 34,420.65<br>(30,868.08–38,230.56) |
| Saint Vincent and the Grenadines | Group I    | 8,336.92<br>(6,924.94–10,098.61)   | 7,887.39<br>(6,789.19–9,121.08)    | 8,688.55<br>(7,707.05–9,834.51)    | 6,887.03<br>(6,016.60–8,003.97)    | 6,252.83<br>(5,344.73–7,481.14)      | 5,684.31<br>(4,629.10–7,086.01)    |
| Saint Vincent and the Grenadines | NCD        | 25,998.40<br>(23,178.15–28,792.75) | 26,836.78<br>(24,196.19–29,777.20) | 26,981.55<br>(24,328.74–29,865.28) | 25,853.49<br>(23,224.67–28,768.61) | 25,369.08<br>(22,731.95–28,232.59)   | 25,444.56<br>(22,744.16–28,701.28) |
| Saint Vincent and the Grenadines | Injuries   | 3,279.44<br>(2,973.48–3,615.87)    | 3,112.21<br>(2,839.24–3,401.94)    | 3,026.43<br>(2,795.11–3,273.12)    | 3,375.24<br>(3,117.94–3,655.51)    | 3,353.86<br>(3,102.68–3,616.75)      | 3,291.78<br>(2,935.25–3,641.57)    |
| Suriname                         | All causes | 38,308.40<br>(35,122.33–41,718.57) | 37,616.63<br>(34,319.27–41,134.46) | 38,085.23<br>(34,802.79–41,694.08) | 37,486.23<br>(34,234.46–41,087.97) | 35,727.61<br>(32,314.60–39,278.15)   | 33,368.21<br>(29,683.17–37,020.90) |
| Suriname                         | Group I    | 9,286.51<br>(8,484.50–10,230.29)   | 9,182.03<br>(8,289.79–10,074.19)   | 9,284.61<br>(8,387.60–10,298.80)   | 8,426.48<br>(7,486.91–9,475.49)    | 7,713.65<br>(6,778.23–8,808.85)      | 6,825.11<br>(5,911.24–7,936.01)    |
| Suriname                         | NCD        | 24,627.98<br>(22,054.42–27,350.82) | 24,161.55<br>(21,695.16–26,930.90) | 24,480.49<br>(21,920.90–27,323.49) | 24,520.69<br>(21,834.83–27,454.13) | 23,619.50<br>(20,938.59–26,468.10)   | 22,546.88<br>(19,631.41–25,571.16) |



**Appendix Table 4. Rate of DALYs per 100,000 individuals for all causes and level 1 cause groups by location for 1990 - 2015, both sexes combined.**

|                                        | Cause      | 1990                               | 1995                               | 2000                               | 2005                               | 2010                               | 2015                               |
|----------------------------------------|------------|------------------------------------|------------------------------------|------------------------------------|------------------------------------|------------------------------------|------------------------------------|
| Suriname                               | Injuries   | 4,393.91<br>(4,103.02–4,720.22)    | 4,273.04<br>(3,972.66–4,600.54)    | 4,320.13<br>(3,988.82–4,665.49)    | 4,539.06<br>(4,172.28–4,959.80)    | 4,394.46<br>(3,980.48–4,832.10)    | 3,996.22<br>(3,543.65–4,510.15)    |
| Trinidad and Tobago                    | All causes | 38,198.58<br>(34,946.16–41,637.51) | 37,783.23<br>(34,643.91–41,118.16) | 37,649.01<br>(34,488.51–40,993.38) | 34,833.43<br>(31,694.63–38,360.66) | 33,607.20<br>(30,231.61–37,010.24) | 32,565.77<br>(28,877.82–36,558.03) |
| Trinidad and Tobago                    | Group I    | 6,286.78<br>(5,657.16–6,977.33)    | 6,542.54<br>(5,896.93–7,220.55)    | 7,390.63<br>(6,746.67–8,152.19)    | 5,657.14<br>(4,983.22–6,419.49)    | 4,956.68<br>(4,167.35–5,864.24)    | 4,618.73<br>(3,699.07–5,793.62)    |
| Trinidad and Tobago                    | NCD        | 28,282.03<br>(25,673.45–31,063.95) | 27,870.09<br>(25,367.78–30,668.50) | 27,061.91<br>(24,549.60–29,950.34) | 25,298.51<br>(22,760.71–28,131.34) | 24,727.83<br>(22,011.07–27,644.77) | 24,351.80<br>(21,427.66–27,462.96) |
| Trinidad and Tobago                    | Injuries   | 3,629.78<br>(3,450.26–3,820.65)    | 3,370.60<br>(3,215.38–3,541.74)    | 3,196.47<br>(3,036.08–3,348.27)    | 3,877.77<br>(3,715.74–4,048.35)    | 3,922.69<br>(3,697.68–4,128.88)    | 3,595.24<br>(3,217.12–4,010.69)    |
| Virgin Islands, U.S.                   | All causes | 30,765.61<br>(27,791.88–34,106.14) | 30,231.90<br>(27,285.03–33,446.84) | 29,298.31<br>(26,450.04–32,599.75) | 28,649.21<br>(25,745.49–31,937.95) | 28,743.45<br>(25,692.38–31,974.77) | 28,569.86<br>(25,228.31–31,921.35) |
| Virgin Islands, U.S.                   | Group I    | 3,747.86<br>(3,327.70–4,232.16)    | 3,516.06<br>(3,080.15–4,040.08)    | 3,359.96<br>(2,964.74–3,845.30)    | 3,017.55<br>(2,646.59–3,501.59)    | 2,802.86<br>(2,409.19–3,287.28)    | 2,701.59<br>(2,303.33–3,193.61)    |
| Virgin Islands, U.S.                   | NCD        | 23,718.18<br>(21,270.07–26,379.77) | 23,221.11<br>(20,780.86–25,884.92) | 22,753.23<br>(20,283.09–25,542.31) | 22,261.98<br>(19,692.14–24,968.45) | 22,488.91<br>(19,914.56–25,224.75) | 22,494.65<br>(19,717.69–25,411.80) |
| Virgin Islands, U.S.                   | Injuries   | 3,299.57<br>(3,050.15–3,616.03)    | 3,494.73<br>(3,185.88–3,862.79)    | 3,185.12<br>(2,940.86–3,447.02)    | 3,369.68<br>(3,106.15–3,617.95)    | 3,451.68<br>(3,115.56–3,740.21)    | 3,373.62<br>(3,005.19–3,763.38)    |
| Tropical Latin America                 | All causes | 41,044.55<br>(38,058.27–44,437.84) | 38,722.82<br>(35,787.16–41,988.70) | 35,696.37<br>(32,754.61–38,970.44) | 32,670.65<br>(29,731.71–35,924.60) | 30,668.04<br>(27,652.93–33,939.11) | 29,368.99<br>(26,367.29–32,632.82) |
| Tropical Latin America                 | Group I    | 10,446.41<br>(9,922.74–10,990.61)  | 8,667.70<br>(8,239.19–9,162.56)    | 6,971.68<br>(6,571.40–7,471.73)    | 5,783.31<br>(5,406.10–6,248.59)    | 5,055.96<br>(4,661.92–5,527.78)    | 4,467.23<br>(4,060.41–4,946.03)    |
| Tropical Latin America                 | NCD        | 25,409.88<br>(22,846.41–28,105.15) | 24,923.11<br>(22,419.54–27,555.95) | 23,965.14<br>(21,415.19–26,756.08) | 22,458.69<br>(19,917.80–25,213.71) | 21,368.08<br>(18,848.30–24,123.95) | 20,944.34<br>(18,425.86–23,647.08) |
| Tropical Latin America                 | Injuries   | 5,188.25<br>(4,985.59–5,421.72)    | 5,132.01<br>(4,924.00–5,355.16)    | 4,759.55<br>(4,565.88–4,980.59)    | 4,428.65<br>(4,243.93–4,626.96)    | 4,243.99<br>(4,053.96–4,427.51)    | 3,957.43<br>(3,743.59–4,174.91)    |
| Brazil                                 | All causes | 41,381.38<br>(38,403.74–44,779.86) | 38,991.28<br>(36,054.41–42,254.86) | 35,862.32<br>(32,918.95–39,123.85) | 32,746.79<br>(29,813.36–36,017.14) | 30,698.18<br>(27,700.56–33,968.87) | 29,381.06<br>(26,375.40–32,627.94) |
| Brazil                                 | Group I    | 10,577.04<br>(10,041.70–11,130.47) | 8,756.92<br>(8,317.56–9,249.16)    | 7,000.40<br>(6,596.41–7,504.42)    | 5,790.62<br>(5,412.38–6,261.10)    | 5,062.09<br>(4,667.05–5,533.80)    | 4,470.56<br>(4,062.09–4,950.32)    |
| Brazil                                 | NCD        | 25,550.61<br>(22,995.51–28,238.90) | 25,045.22<br>(22,540.02–27,677.15) | 24,061.40<br>(21,513.46–26,858.72) | 22,494.96<br>(19,944.97–25,232.46) | 21,364.50<br>(18,850.37–24,120.39) | 20,930.98<br>(18,420.25–23,639.30) |
| Brazil                                 | Injuries   | 5,253.74<br>(5,050.98–5,490.63)    | 5,189.14<br>(4,978.80–5,415.09)    | 4,800.51<br>(4,604.81–5,021.19)    | 4,461.21<br>(4,274.86–4,659.89)    | 4,271.59<br>(4,080.08–4,456.96)    | 3,979.52<br>(3,762.98–4,200.74)    |
| Paraguay                               | All causes | 29,780.63<br>(26,688.60–33,010.52) | 29,748.08<br>(26,640.45–33,115.73) | 29,780.18<br>(26,745.02–33,134.31) | 29,907.67<br>(26,729.08–33,284.17) | 29,719.71<br>(26,492.51–33,182.96) | 29,067.78<br>(25,514.68–32,973.87) |
| Paraguay                               | Group I    | 6,880.79<br>(6,356.16–7,432.18)    | 6,229.92<br>(5,728.96–6,780.39)    | 6,072.94<br>(5,558.03–6,696.39)    | 5,516.49<br>(4,977.13–6,128.96)    | 4,832.60<br>(4,230.01–5,507.27)    | 4,313.70<br>(3,712.32–5,028.40)    |
| Paraguay                               | NCD        | 20,165.01<br>(17,602.40–22,902.20) | 20,467.18<br>(17,834.71–23,280.12) | 20,409.90<br>(17,808.67–23,129.41) | 21,055.86<br>(18,401.80–23,994.07) | 21,487.54<br>(18,944.25–24,491.06) | 21,440.87<br>(18,700.63–24,582.27) |
| Paraguay                               | Injuries   | 2,734.83<br>(2,510.55–2,958.47)    | 3,050.98<br>(2,805.87–3,314.04)    | 3,297.33<br>(3,044.75–3,563.42)    | 3,335.32<br>(3,068.06–3,623.02)    | 3,399.57<br>(3,084.39–3,736.47)    | 3,313.21<br>(2,861.24–3,922.60)    |
| Southeast Asia, East Asia, and Oceania | All causes | 43,364.03<br>(40,613.34–46,557.77) | 39,991.57<br>(37,252.06–43,079.69) | 37,117.42<br>(34,551.50–39,977.96) | 33,195.99<br>(30,547.34–36,105.23) | 29,341.23<br>(26,651.69–32,253.01) | 26,536.15<br>(23,992.06–29,426.90) |
| Southeast Asia, East Asia, and Oceania | Group I    | 11,795.13<br>(11,071.77–12,625.16) | 9,979.15<br>(9,353.84–10,655.08)   | 8,375.25<br>(7,849.79–8,970.97)    | 6,230.58<br>(5,816.17–6,714.28)    | 4,897.58<br>(4,525.74–5,333.94)    | 4,028.68<br>(3,690.25–4,435.57)    |
| Southeast Asia, East Asia, and Oceania | NCD        | 26,831.18<br>(24,576.13–29,370.68) | 25,648.19<br>(23,426.44–28,064.21) | 24,792.40<br>(22,686.14–27,122.36) | 23,444.68<br>(21,244.86–25,791.62) | 21,357.01<br>(19,119.89–23,714.94) | 19,866.14<br>(17,753.82–22,215.73) |
| Southeast Asia, East Asia, and Oceania | Injuries   | 4,737.72<br>(4,362.95–5,024.44)    | 4,364.23<br>(4,049.01–4,604.71)    | 3,949.76<br>(3,754.93–4,133.28)    | 3,520.73<br>(3,326.20–3,693.62)    | 3,086.64<br>(2,881.98–3,254.78)    | 2,641.33<br>(2,443.34–2,820.57)    |
| East Asia                              | All causes | 41,882.96<br>(39,135.08–45,184.34) | 38,563.14<br>(35,919.05–41,546.12) | 35,533.91<br>(32,990.25–38,244.56) | 30,951.32<br>(28,336.57–33,748.99) | 26,813.65<br>(24,344.07–29,653.10) | 23,927.63<br>(21,488.76–26,658.49) |
| East Asia                              | Group I    | 9,256.82<br>(8,573.12–9,981.95)    | 7,977.34<br>(7,357.10–8,624.03)    | 6,524.20<br>(5,952.45–7,125.60)    | 4,098.61<br>(3,756.78–4,508.42)    | 3,022.89<br>(2,737.33–3,390.57)    | 2,486.45<br>(2,201.34–2,841.66)    |

**Appendix Table 4. Rate of DALYs per 100,000 individuals for all causes and level 1 cause groups by location for 1990 - 2015, both sexes combined.**

|                | Cause      | 1990                               | 1995                               | 2000                               | 2005                               | 2010                               | 2015                               |
|----------------|------------|------------------------------------|------------------------------------|------------------------------------|------------------------------------|------------------------------------|------------------------------------|
| East Asia      | NCD        | 27,538.98<br>(25,319.86–30,045.08) | 25,966.75<br>(23,779.53–28,289.26) | 24,892.61<br>(22,773.59–27,260.87) | 23,256.19<br>(21,112.83–25,597.19) | 20,688.02<br>(18,585.40–23,013.38) | 18,861.36<br>(16,841.05–21,180.02) |
| East Asia      | Injuries   | 5,087.16<br>(4,623.75–5,424.45)    | 4,619.06<br>(4,244.65–4,898.17)    | 4,117.10<br>(3,909.92–4,305.23)    | 3,596.53<br>(3,380.22–3,781.44)    | 3,102.73<br>(2,876.11–3,286.62)    | 2,579.82<br>(2,373.76–2,773.48)    |
| China          | All causes | 42,160.68<br>(39,415.19–45,447.85) | 38,359.90<br>(35,654.09–41,281.18) | 35,213.97<br>(32,671.04–38,054.65) | 31,028.28<br>(28,422.00–33,825.36) | 26,818.58<br>(24,342.78–29,661.39) | 23,867.88<br>(21,435.71–26,616.64) |
| China          | Group I    | 9,353.01<br>(8,673.21–10,080.48)   | 7,638.00<br>(7,135.09–8,236.87)    | 6,095.01<br>(5,707.21–6,531.68)    | 4,096.13<br>(3,757.15–4,502.73)    | 3,002.42<br>(2,714.40–3,364.58)    | 2,465.72<br>(2,181.96–2,816.07)    |
| China          | NCD        | 27,687.74<br>(25,429.66–30,191.83) | 26,077.47<br>(23,898.72–28,400.20) | 24,984.01<br>(22,874.33–27,367.14) | 23,325.21<br>(21,184.21–25,647.30) | 20,707.15<br>(18,594.27–23,008.90) | 18,830.11<br>(16,834.02–21,148.94) |
| China          | Injuries   | 5,119.93<br>(4,647.42–5,457.70)    | 4,644.42<br>(4,262.02–4,925.73)    | 4,134.96<br>(3,925.34–4,322.42)    | 3,606.95<br>(3,392.35–3,796.10)    | 3,109.02<br>(2,876.51–3,297.33)    | 2,572.05<br>(2,357.83–2,767.94)    |
| North Korea    | All causes | 38,085.33<br>(30,125.26–48,422.46) | 59,838.94<br>(39,135.28–82,190.60) | 59,510.71<br>(38,972.43–81,660.10) | 34,659.33<br>(29,211.90–40,734.19) | 32,533.62<br>(28,181.09–37,804.91) | 30,895.75<br>(26,132.10–36,573.39) |
| North Korea    | Group I    | 8,622.97<br>(5,095.59–14,229.25)   | 30,486.65<br>(10,845.05–51,828.92) | 29,534.99<br>(9,729.21–50,722.31)  | 5,578.42<br>(3,669.36–7,925.73)    | 4,622.94<br>(3,152.12–6,573.36)    | 3,852.06<br>(2,559.77–5,701.44)    |
| North Korea    | NCD        | 24,836.80<br>(20,403.32–29,798.90) | 25,006.50<br>(20,609.45–29,437.23) | 25,601.36<br>(21,215.16–30,112.06) | 24,948.68<br>(21,330.94–28,706.49) | 24,137.03<br>(21,037.67–27,559.53) | 23,497.04<br>(19,929.58–27,412.52) |
| North Korea    | Injuries   | 4,625.55<br>(3,365.31–6,507.74)    | 4,345.80<br>(3,272.08–5,728.83)    | 4,374.36<br>(3,368.79–5,682.75)    | 4,132.23<br>(3,337.84–5,110.51)    | 3,773.66<br>(3,099.28–4,556.50)    | 3,546.65<br>(2,804.28–4,500.79)    |
| Taiwan         | All causes | 27,977.06<br>(25,373.71–31,021.91) | 26,356.55<br>(23,900.54–29,121.85) | 24,440.90<br>(21,962.15–27,211.29) | 22,695.80<br>(20,234.77–25,508.20) | 20,752.89<br>(18,290.87–23,534.57) | 20,378.46<br>(17,549.41–23,420.86) |
| Taiwan         | Group I    | 2,828.77<br>(2,288.15–3,648.39)    | 2,233.55<br>(1,889.92–2,675.42)    | 2,038.00<br>(1,728.69–2,406.47)    | 1,869.23<br>(1,527.70–2,235.87)    | 1,771.96<br>(1,375.58–2,182.07)    | 1,816.72<br>(1,375.60–2,286.23)    |
| Taiwan         | NCD        | 21,656.86<br>(19,576.35–24,032.47) | 20,877.37<br>(18,818.55–23,261.82) | 19,653.72<br>(17,555.38–22,029.56) | 18,409.72<br>(16,280.44–20,842.20) | 16,950.63<br>(14,775.25–19,301.15) | 16,604.28<br>(14,191.36–19,180.16) |
| Taiwan         | Injuries   | 3,491.43<br>(3,196.12–3,772.93)    | 3,245.64<br>(2,987.23–3,480.37)    | 2,749.17<br>(2,565.14–2,951.13)    | 2,416.85<br>(2,274.54–2,578.85)    | 2,030.29<br>(1,908.42–2,167.95)    | 1,957.46<br>(1,701.69–2,228.56)    |
| Southeast Asia | All causes | 46,591.27<br>(43,381.55–50,279.26) | 43,141.50<br>(39,972.70–46,825.79) | 40,521.95<br>(37,316.14–43,854.66) | 37,351.40<br>(34,218.33–40,798.94) | 34,496.92<br>(31,388.14–37,723.27) | 32,090.92<br>(28,861.91–35,554.90) |
| Southeast Asia | Group I    | 18,186.71<br>(16,991.22–19,574.97) | 14,811.22<br>(13,833.77–15,945.26) | 12,467.63<br>(11,667.44–13,440.26) | 10,393.58<br>(9,706.26–11,172.95)  | 8,508.72<br>(7,909.74–9,182.63)    | 6,992.38<br>(6,420.45–7,643.03)    |
| Southeast Asia | NCD        | 24,456.70<br>(21,928.83–27,222.51) | 24,514.42<br>(21,901.51–27,259.90) | 24,396.05<br>(21,937.52–26,956.51) | 23,598.05<br>(21,124.05–26,172.07) | 22,876.88<br>(20,416.20–25,495.37) | 22,298.05<br>(19,730.24–25,037.67) |
| Southeast Asia | Injuries   | 3,947.86<br>(3,507.67–4,339.03)    | 3,815.86<br>(3,468.16–4,130.19)    | 3,658.27<br>(3,385.10–3,929.28)    | 3,359.31<br>(3,117.13–3,604.88)    | 3,111.32<br>(2,880.85–3,361.64)    | 2,800.49<br>(2,534.19–3,069.09)    |
| Cambodia       | All causes | 67,390.33<br>(63,310.87–72,215.59) | 65,745.76<br>(61,877.19–70,062.02) | 60,363.72<br>(56,681.42–64,288.38) | 49,963.46<br>(46,403.45–53,708.10) | 42,572.34<br>(38,946.38–46,389.65) | 37,331.65<br>(33,060.84–41,490.72) |
| Cambodia       | Group I    | 29,792.91<br>(27,342.15–32,046.46) | 28,011.69<br>(25,899.51–30,130.64) | 23,921.71<br>(22,006.83–25,707.07) | 16,651.78<br>(15,265.28–18,000.60) | 12,167.45<br>(11,183.29–13,237.15) | 9,399.22<br>(8,437.26–10,439.77)   |
| Cambodia       | NCD        | 31,348.28<br>(28,048.80–34,786.05) | 31,337.80<br>(28,336.06–34,531.73) | 30,638.89<br>(27,594.06–33,711.05) | 28,555.81<br>(25,748.03–31,479.06) | 26,251.40<br>(23,410.70–29,251.52) | 24,415.10<br>(21,248.69–27,478.48) |
| Cambodia       | Injuries   | 6,249.14<br>(5,114.04–7,264.49)    | 6,396.28<br>(5,223.19–7,391.66)    | 5,803.12<br>(4,709.32–6,742.70)    | 4,755.87<br>(4,009.79–5,472.51)    | 4,153.49<br>(3,612.63–4,697.03)    | 3,517.33<br>(2,966.27–4,045.52)    |
| Indonesia      | All causes | 49,878.45<br>(46,555.58–53,469.04) | 44,696.85<br>(41,567.98–48,149.84) | 41,418.65<br>(38,479.87–44,697.07) | 38,728.89<br>(35,622.96–42,164.88) | 36,299.87<br>(32,842.17–40,169.88) | 33,810.35<br>(29,413.59–38,112.95) |
| Indonesia      | Group I    | 21,943.89<br>(20,317.81–23,992.87) | 17,249.12<br>(16,112.80–18,718.05) | 14,022.50<br>(13,106.17–15,240.59) | 11,715.55<br>(10,892.52–12,791.83) | 9,765.32<br>(8,959.81–10,752.10)   | 8,112.37<br>(7,179.92–9,239.04)    |
| Indonesia      | NCD        | 24,637.62<br>(21,966.22–27,456.44) | 24,531.65<br>(21,961.65–27,130.43) | 24,621.56<br>(22,143.48–27,209.22) | 24,411.30<br>(21,870.39–27,012.51) | 24,082.72<br>(21,346.70–27,007.52) | 23,423.20<br>(20,052.97–26,819.74) |
| Indonesia      | Injuries   | 3,296.93<br>(2,465.62–3,968.76)    | 2,916.09<br>(2,303.73–3,356.63)    | 2,774.60<br>(2,369.00–3,090.75)    | 2,602.04<br>(2,310.98–2,871.12)    | 2,451.83<br>(2,161.61–2,797.45)    | 2,274.77<br>(1,895.96–2,716.09)    |
| Laos           | All causes | 84,928.18<br>(76,956.28–92,686.15) | 78,184.96<br>(71,912.07–84,428.05) | 70,704.75<br>(66,085.77–75,540.03) | 59,778.19<br>(55,609.04–64,206.60) | 49,521.53<br>(45,190.81–53,865.24) | 42,810.05<br>(37,739.91–48,560.68) |

**Appendix Table 4. Rate of DALYs per 100,000 individuals for all causes and level 1 cause groups by location for 1990 - 2015, both sexes combined.**

|             | Cause      | 1990                               | 1995                               | 2000                               | 2005                               | 2010                               | 2015                               |
|-------------|------------|------------------------------------|------------------------------------|------------------------------------|------------------------------------|------------------------------------|------------------------------------|
| Laos        | Group I    | 40,514.49<br>(36,289.97-44,652.65) | 34,671.47<br>(31,055.92-38,588.32) | 29,239.57<br>(26,177.61-32,882.27) | 22,351.01<br>(19,873.03-25,073.02) | 15,909.20<br>(14,007.88-17,993.33) | 11,958.38<br>(9,935.73-14,496.63)  |
| Laos        | NCD        | 36,534.93<br>(31,066.48-42,622.19) | 36,137.44<br>(31,598.23-41,118.82) | 34,453.10<br>(30,509.86-38,407.57) | 31,296.83<br>(28,097.43-34,939.94) | 28,453.05<br>(25,238.05-31,766.06) | 26,456.48<br>(22,861.47-30,344.15) |
| Laos        | Injuries   | 7,878.76<br>(5,523.00-9,942.21)    | 7,376.05<br>(5,209.77-9,365.80)    | 7,012.08<br>(4,934.74-8,718.58)    | 6,130.34<br>(4,540.05-7,610.64)    | 5,159.28<br>(4,096.76-6,243.84)    | 4,395.18<br>(3,593.47-5,323.24)    |
| Malaysia    | All causes | 32,034.75<br>(29,340.21-35,135.40) | 30,914.03<br>(28,168.63-33,910.36) | 29,292.54<br>(26,524.25-32,243.33) | 27,647.29<br>(24,975.03-30,642.49) | 27,344.56<br>(24,612.69-30,405.01) | 26,075.11<br>(22,908.40-29,516.74) |
| Malaysia    | Group I    | 6,429.70<br>(5,755.90-7,239.69)    | 5,598.73<br>(5,035.28-6,278.33)    | 5,139.48<br>(4,575.64-5,768.06)    | 4,804.46<br>(4,034.62-5,504.83)    | 4,698.35<br>(3,950.68-5,396.68)    | 4,167.16<br>(3,456.96-4,902.35)    |
| Malaysia    | NCD        | 22,550.85<br>(20,307.59-24,946.17) | 22,241.71<br>(20,017.79-24,639.52) | 21,251.12<br>(19,009.62-23,628.27) | 20,200.85<br>(17,921.06-22,572.13) | 20,020.81<br>(17,761.97-22,410.14) | 19,421.40<br>(16,815.95-22,161.81) |
| Malaysia    | Injuries   | 3,054.20<br>(2,808.23-3,280.93)    | 3,073.59<br>(2,843.61-3,267.60)    | 2,901.94<br>(2,688.87-3,090.35)    | 2,641.98<br>(2,450.43-2,810.02)    | 2,625.40<br>(2,419.88-2,808.32)    | 2,486.55<br>(2,186.22-2,795.55)    |
| Maldives    | All causes | 46,605.38<br>(43,172.63-50,442.06) | 39,277.00<br>(35,999.94-43,189.61) | 32,367.41<br>(29,251.42-35,913.71) | 26,023.00<br>(23,087.67-29,375.70) | 22,412.77<br>(19,551.87-25,664.49) | 20,914.73<br>(17,862.90-24,243.77) |
| Maldives    | Group I    | 12,371.34<br>(10,302.69-15,493.20) | 8,877.73<br>(7,713.39-10,543.36)   | 6,255.65<br>(5,542.66-7,102.62)    | 4,772.89<br>(4,132.81-5,545.28)    | 3,586.78<br>(3,061.77-4,177.12)    | 2,934.40<br>(2,469.00-3,492.19)    |
| Maldives    | NCD        | 27,569.44<br>(24,787.62-30,625.36) | 24,939.26<br>(22,276.89-27,841.59) | 21,698.66<br>(19,175.93-24,429.89) | 18,043.93<br>(15,735.30-20,672.05) | 16,263.72<br>(13,940.19-18,829.85) | 15,767.70<br>(13,294.25-18,499.83) |
| Maldives    | Injuries   | 6,664.61<br>(5,045.73-7,952.55)    | 5,460.01<br>(4,560.98-6,125.84)    | 4,413.10<br>(4,080.25-4,751.49)    | 3,206.19<br>(2,909.53-3,461.03)    | 2,562.26<br>(2,373.63-2,776.87)    | 2,212.63<br>(1,922.04-2,520.35)    |
| Mauritius   | All causes | 36,402.80<br>(33,753.59-39,278.38) | 34,428.77<br>(31,828.95-37,220.20) | 32,209.91<br>(29,646.80-35,097.33) | 30,691.11<br>(28,151.67-33,579.04) | 29,353.62<br>(26,751.46-32,345.13) | 27,619.36<br>(24,928.25-30,711.65) |
| Mauritius   | Group I    | 5,298.08<br>(4,890.17-5,919.52)    | 4,405.83<br>(4,049.05-4,979.89)    | 3,580.47<br>(3,281.10-4,035.65)    | 3,073.69<br>(2,829.35-3,410.38)    | 3,058.73<br>(2,801.94-3,443.17)    | 2,809.84<br>(2,551.72-3,171.03)    |
| Mauritius   | NCD        | 28,595.45<br>(26,248.47-31,184.27) | 27,445.36<br>(25,089.24-30,000.00) | 26,267.94<br>(23,960.44-28,855.57) | 25,410.08<br>(23,116.46-28,027.90) | 24,124.76<br>(21,773.88-26,895.66) | 22,887.73<br>(20,379.62-25,698.08) |
| Mauritius   | Injuries   | 2,509.27<br>(2,315.80-2,661.84)    | 2,577.59<br>(2,399.95-2,730.45)    | 2,361.50<br>(2,187.14-2,510.09)    | 2,207.35<br>(2,088.68-2,327.73)    | 2,170.13<br>(2,041.34-2,297.81)    | 1,921.79<br>(1,777.91-2,064.95)    |
| Myanmar     | All causes | 66,985.67<br>(53,429.37-82,904.52) | 62,881.14<br>(50,296.06-77,265.76) | 57,996.27<br>(46,112.22-72,152.10) | 51,452.40<br>(40,153.38-63,920.47) | 44,796.18<br>(35,025.86-57,466.72) | 40,237.53<br>(31,457.39-50,931.37) |
| Myanmar     | Group I    | 30,650.75<br>(25,451.44-36,696.21) | 26,862.60<br>(22,365.34-33,073.48) | 23,070.87<br>(18,912.55-29,473.73) | 18,309.56<br>(15,243.87-22,962.63) | 13,448.10<br>(10,886.47-17,018.43) | 10,148.55<br>(8,116.14-12,751.48)  |
| Myanmar     | NCD        | 32,205.75<br>(23,859.75-41,865.88) | 31,930.86<br>(23,470.91-40,820.69) | 31,215.75<br>(22,872.65-40,585.52) | 29,693.39<br>(21,842.55-38,278.50) | 28,053.19<br>(21,060.71-37,023.74) | 27,009.09<br>(20,403.81-34,878.31) |
| Myanmar     | Injuries   | 4,129.17<br>(3,113.61-5,358.10)    | 4,087.67<br>(2,962.73-5,372.36)    | 3,709.65<br>(2,581.98-5,032.16)    | 3,449.45<br>(2,359.00-4,573.34)    | 3,294.89<br>(2,382.09-4,449.36)    | 3,079.89<br>(2,197.96-4,113.06)    |
| Philippines | All causes | 43,061.88<br>(40,089.63-46,576.08) | 39,776.51<br>(36,741.02-43,141.07) | 38,848.87<br>(35,846.10-42,248.04) | 38,705.55<br>(35,778.60-42,125.48) | 36,471.78<br>(33,535.60-39,777.05) | 34,554.40<br>(31,380.83-38,105.10) |
| Philippines | Group I    | 16,456.69<br>(15,631.05-17,507.15) | 13,359.64<br>(12,544.09-14,415.82) | 11,469.64<br>(10,735.33-12,374.83) | 10,531.91<br>(9,854.69-11,356.72)  | 9,057.38<br>(8,458.15-9,744.28)    | 7,617.21<br>(7,005.02-8,321.32)    |
| Philippines | NCD        | 23,203.57<br>(20,792.27-25,824.23) | 23,428.71<br>(21,057.08-25,981.75) | 24,156.38<br>(21,813.67-26,711.59) | 25,027.91<br>(22,668.93-27,628.38) | 24,568.61<br>(22,226.41-27,184.09) | 24,279.27<br>(21,740.12-27,184.22) |
| Philippines | Injuries   | 3,401.62<br>(3,083.97-3,697.57)    | 2,988.16<br>(2,773.39-3,190.93)    | 3,222.85<br>(3,078.76-3,381.16)    | 3,145.73<br>(3,005.31-3,304.14)    | 2,845.79<br>(2,695.79-3,010.24)    | 2,657.92<br>(2,458.53-2,892.07)    |
| Sri Lanka   | All causes | 37,008.16<br>(34,107.80-40,276.87) | 33,787.47<br>(31,017.15-36,928.22) | 32,003.76<br>(29,321.21-35,093.69) | 29,240.34<br>(26,561.35-32,293.30) | 27,617.65<br>(24,671.87-31,064.73) | 23,617.12<br>(19,922.99-28,024.76) |
| Sri Lanka   | Group I    | 9,728.57<br>(9,081.31-10,495.71)   | 6,318.72<br>(5,795.35-6,952.08)    | 5,022.66<br>(4,590.74-5,584.84)    | 4,579.27<br>(4,189.84-5,059.20)    | 3,443.17<br>(3,068.38-3,931.01)    | 2,802.48<br>(2,373.68-3,287.99)    |
| Sri Lanka   | NCD        | 20,090.81<br>(17,877.40-22,511.13) | 20,346.07<br>(18,101.59-22,772.04) | 20,898.40<br>(18,749.32-23,339.84) | 20,282.75<br>(18,101.98-22,807.82) | 18,846.50<br>(16,597.41-21,338.01) | 17,569.19<br>(14,703.51-20,940.33) |
| Sri Lanka   | Injuries   | 7,188.79<br>(6,733.35-7,664.91)    | 7,122.68<br>(6,868.40-7,372.10)    | 6,082.70<br>(5,574.93-6,569.84)    | 4,378.33<br>(4,188.42-4,587.97)    | 5,327.98<br>(3,970.43-6,713.94)    | 3,245.46<br>(2,634.03-3,949.65)    |

**Appendix Table 4. Rate of DALYs per 100,000 individuals for all causes and level 1 cause groups by location for 1990 - 2015, both sexes combined.**

|                                | Cause      | 1990                               | 1995                               | 2000                               | 2005                               | 2010                               | 2015                               |
|--------------------------------|------------|------------------------------------|------------------------------------|------------------------------------|------------------------------------|------------------------------------|------------------------------------|
| Seychelles                     | All causes | 37,104.38<br>(34,281.02–40,139.73) | 35,659.39<br>(32,750.56–38,629.67) | 33,720.29<br>(30,896.11–36,877.42) | 31,897.40<br>(29,115.74–34,898.88) | 29,803.42<br>(27,081.54–33,001.33) | 28,249.88<br>(25,207.37–31,857.79) |
| Seychelles                     | Group I    | 5,984.53<br>(5,430.12–6,562.86)    | 5,025.54<br>(4,585.97–5,588.21)    | 4,557.36<br>(4,160.91–5,117.99)    | 4,442.87<br>(4,066.46–4,912.31)    | 4,148.19<br>(3,709.67–4,648.59)    | 3,878.67<br>(3,372.05–4,424.24)    |
| Seychelles                     | NCD        | 27,422.85<br>(25,019.27–29,950.59) | 26,720.70<br>(24,345.25–29,330.62) | 25,408.37<br>(23,068.89–28,065.88) | 24,061.04<br>(21,644.38–26,647.62) | 22,438.98<br>(20,093.77–25,051.71) | 21,658.16<br>(18,950.90–24,522.36) |
| Seychelles                     | Injuries   | 3,697.00<br>(3,426.46–3,996.42)    | 3,913.15<br>(3,613.95–4,196.66)    | 3,754.57<br>(3,492.42–4,005.39)    | 3,393.49<br>(3,100.91–3,652.64)    | 3,216.24<br>(2,936.22–3,538.48)    | 2,713.04<br>(2,397.86–3,063.10)    |
| Thailand                       | All causes | 35,087.73<br>(31,917.85–38,360.17) | 35,725.61<br>(32,664.89–39,290.74) | 35,030.80<br>(32,022.77–38,605.17) | 30,850.57<br>(28,001.05–34,041.82) | 28,466.93<br>(25,611.19–31,453.20) | 27,364.77<br>(23,807.86–30,925.59) |
| Thailand                       | Group I    | 8,093.53<br>(7,355.78–9,013.09)    | 6,562.68<br>(5,820.19–7,455.87)    | 6,387.46<br>(5,859.14–6,991.99)    | 5,206.54<br>(4,616.69–5,893.10)    | 4,616.69<br>(3,970.28–5,181.02)    | 4,149.75<br>(3,566.59–4,687.77)    |
| Thailand                       | NCD        | 22,443.53<br>(20,053.53–25,019.08) | 23,604.44<br>(21,148.00–26,435.45) | 23,199.11<br>(20,832.69–25,998.73) | 20,552.00<br>(18,078.74–23,168.52) | 19,618.06<br>(17,076.71–22,143.37) | 19,489.43<br>(16,689.75–22,328.05) |
| Thailand                       | Injuries   | 4,550.67<br>(4,243.78–4,870.95)    | 5,558.49<br>(5,166.68–5,985.05)    | 5,444.24<br>(4,966.00–5,920.26)    | 5,092.02<br>(4,690.31–5,520.78)    | 4,232.17<br>(3,910.49–4,580.33)    | 3,725.59<br>(3,220.03–4,285.82)    |
| Timor-Leste                    | All causes | 64,406.66<br>(58,851.28–70,468.57) | 55,749.83<br>(50,928.99–60,673.73) | 58,711.99<br>(51,377.34–66,202.42) | 42,421.38<br>(38,456.44–46,480.24) | 35,805.24<br>(31,564.29–40,442.87) | 32,438.03<br>(27,534.46–38,309.15) |
| Timor-Leste                    | Group I    | 33,214.05<br>(29,174.89–37,979.53) | 26,322.91<br>(22,844.41–30,690.04) | 23,182.37<br>(19,816.42–27,500.63) | 16,122.40<br>(13,867.95–19,276.96) | 11,886.68<br>(9,696.01–14,740.54)  | 9,418.12<br>(7,264.95–12,448.85)   |
| Timor-Leste                    | NCD        | 26,379.41<br>(22,501.30–30,879.62) | 25,047.26<br>(21,633.64–28,791.01) | 23,593.17<br>(19,867.63–27,216.71) | 22,564.19<br>(19,332.07–25,718.41) | 20,627.65<br>(17,422.18–23,831.46) | 20,088.86<br>(16,741.93–22,843.35) |
| Timor-Leste                    | Injuries   | 4,813.21<br>(3,054.87–6,508.62)    | 4,379.66<br>(2,915.82–5,665.50)    | 11,936.45<br>(6,023.18–17,918.60)  | 3,734.79<br>(2,749.39–4,535.82)    | 3,290.90<br>(2,502.31–4,034.03)    | 2,931.06<br>(2,300.09–3,723.51)    |
| Vietnam                        | All causes | 38,542.12<br>(34,690.99–43,000.64) | 35,832.63<br>(31,324.60–40,701.89) | 32,918.83<br>(28,881.30–36,966.48) | 30,504.15<br>(25,879.82–35,042.32) | 27,989.67<br>(23,504.70–32,918.14) | 26,348.41<br>(22,090.69–30,787.94) |
| Vietnam                        | Group I    | 12,095.33<br>(10,444.88–14,296.50) | 9,815.16<br>(8,373.27–11,606.15)   | 7,628.65<br>(6,529.21–8,978.49)    | 6,192.80<br>(5,256.75–7,601.48)    | 4,814.96<br>(4,055.85–5,992.02)    | 3,863.22<br>(3,197.46–4,939.49)    |
| Vietnam                        | NCD        | 22,214.54<br>(19,457.29–25,416.82) | 22,074.13<br>(18,555.62–25,519.08) | 21,603.35<br>(18,674.58–24,407.95) | 20,808.74<br>(17,302.51–24,248.11) | 19,915.46<br>(16,549.78–23,612.34) | 19,465.38<br>(16,085.34–22,889.83) |
| Vietnam                        | Injuries   | 4,232.25<br>(3,243.62–5,172.85)    | 3,943.34<br>(3,129.91–4,764.26)    | 3,686.83<br>(3,030.43–4,337.00)    | 3,502.60<br>(2,774.28–4,275.73)    | 3,259.24<br>(2,538.96–4,199.54)    | 3,019.80<br>(2,327.39–3,825.74)    |
| Oceania                        | All causes | 65,486.86<br>(55,151.41–77,623.95) | 63,720.12<br>(52,787.13–76,047.72) | 62,618.54<br>(51,384.59–74,978.21) | 61,861.89<br>(50,149.58–75,577.71) | 59,022.30<br>(47,633.99–73,901.40) | 54,772.34<br>(44,610.87–68,658.11) |
| Oceania                        | Group I    | 20,715.45<br>(18,051.73–23,854.04) | 19,160.02<br>(16,503.36–22,383.18) | 17,784.45<br>(14,765.40–20,986.94) | 16,922.31<br>(13,763.18–20,500.73) | 14,941.14<br>(12,062.12–19,015.50) | 12,747.62<br>(10,229.20–16,236.43) |
| Oceania                        | NCD        | 38,963.58<br>(31,905.79–47,222.74) | 38,905.62<br>(31,707.72–47,280.66) | 39,204.76<br>(31,483.34–47,359.28) | 39,376.60<br>(31,510.36–48,223.85) | 38,795.95<br>(31,313.20–49,119.43) | 37,116.02<br>(30,109.59–46,583.91) |
| Oceania                        | Injuries   | 5,807.83<br>(4,525.99–7,504.01)    | 5,654.48<br>(4,338.51–7,419.46)    | 5,629.32<br>(4,241.43–7,360.38)    | 5,562.98<br>(4,113.96–7,362.98)    | 5,285.20<br>(3,931.52–7,243.44)    | 4,908.70<br>(3,697.49–6,630.60)    |
| American Samoa                 | All causes | 35,900.40<br>(32,255.74–39,886.81) | 35,211.94<br>(31,253.97–39,474.89) | 33,311.78<br>(29,677.24–37,061.93) | 32,673.74<br>(29,181.28–36,512.63) | 31,264.96<br>(27,691.41–35,336.20) | 30,979.19<br>(26,542.57–35,263.14) |
| American Samoa                 | Group I    | 4,984.38<br>(4,471.96–5,608.36)    | 4,527.43<br>(4,061.26–5,064.99)    | 3,937.55<br>(3,513.68–4,410.15)    | 3,486.38<br>(3,118.78–3,931.01)    | 3,047.10<br>(2,683.13–3,455.40)    | 2,850.31<br>(2,437.96–3,302.46)    |
| American Samoa                 | NCD        | 27,312.20<br>(24,379.16–30,540.77) | 27,274.98<br>(24,126.24–30,631.65) | 26,296.86<br>(23,239.72–29,479.06) | 26,174.13<br>(23,220.91–29,477.29) | 25,457.04<br>(22,427.41–28,902.44) | 25,514.14<br>(21,765.62–29,213.33) |
| American Samoa                 | Injuries   | 3,603.82<br>(3,177.06–4,077.18)    | 3,409.52<br>(2,986.18–3,881.96)    | 3,077.37<br>(2,784.21–3,419.54)    | 3,013.23<br>(2,718.89–3,328.43)    | 2,760.83<br>(2,477.88–3,088.46)    | 2,614.75<br>(2,233.93–3,009.45)    |
| Federated States of Micronesia | All causes | 48,685.85<br>(36,542.36–62,245.62) | 45,989.27<br>(34,998.21–59,412.93) | 43,122.48<br>(33,288.60–56,876.86) | 40,812.30<br>(31,270.41–55,876.41) | 39,423.65<br>(30,268.13–55,170.29) | 37,933.50<br>(29,075.54–53,827.86) |
| Federated States of Micronesia | Group I    | 10,030.50<br>(8,125.00–12,271.42)  | 8,629.15<br>(6,845.37–11,228.75)   | 7,029.94<br>(5,431.04–9,819.34)    | 5,651.56<br>(4,346.78–7,730.25)    | 4,884.39<br>(3,697.75–6,548.30)    | 4,316.28<br>(3,332.49–5,790.41)    |
| Federated States of Micronesia | NCD        | 34,260.00<br>(24,801.75–44,510.78) | 33,273.91<br>(24,768.08–43,946.93) | 32,304.36<br>(24,633.16–43,627.87) | 31,588.60<br>(23,978.69–43,911.86) | 31,185.31<br>(23,698.10–43,745.43) | 30,417.32<br>(23,041.84–43,483.18) |

**Appendix Table 4. Rate of DALYs per 100,000 individuals for all causes and level 1 cause groups by location for 1990 - 2015, both sexes combined.**

|                                | Cause      | 1990                               | 1995                               | 2000                               | 2005                               | 2010                               | 2015                               |
|--------------------------------|------------|------------------------------------|------------------------------------|------------------------------------|------------------------------------|------------------------------------|------------------------------------|
| Federated States of Micronesia | Injuries   | 4,395.36<br>(2,968.70–5,982.96)    | 4,086.21<br>(2,796.94–5,685.67)    | 3,788.18<br>(2,641.63–5,270.50)    | 3,572.14<br>(2,483.43–5,282.68)    | 3,353.95<br>(2,378.29–5,068.88)    | 3,199.91<br>(2,269.33–4,881.86)    |
| Fiji                           | All causes | 47,505.46<br>(42,048.75–53,874.62) | 49,001.41<br>(43,665.72–54,692.65) | 50,115.16<br>(45,162.40–55,152.61) | 48,408.04<br>(43,918.55–53,128.71) | 47,420.68<br>(42,553.06–52,568.31) | 45,705.33<br>(40,041.85–51,949.32) |
| Fiji                           | Group I    | 8,658.46<br>(7,224.77–10,282.99)   | 8,406.44<br>(7,137.03–9,964.27)    | 8,636.87<br>(7,393.10–10,074.23)   | 8,154.18<br>(6,972.39–9,530.14)    | 7,697.85<br>(6,381.32–9,360.39)    | 7,216.04<br>(5,722.93–9,272.80)    |
| Fiji                           | NCD        | 35,587.36<br>(31,449.23–40,682.71) | 37,233.05<br>(33,183.25–41,692.38) | 37,831.46<br>(34,144.15–41,728.22) | 36,491.61<br>(32,900.60–40,080.89) | 36,345.46<br>(32,701.27–40,429.50) | 35,065.45<br>(30,742.06–40,015.30) |
| Fiji                           | Injuries   | 3,259.64<br>(2,768.33–3,796.25)    | 3,361.93<br>(2,950.97–3,797.72)    | 3,646.84<br>(3,278.34–4,015.43)    | 3,762.26<br>(3,369.77–4,173.77)    | 3,377.36<br>(2,986.80–3,829.64)    | 3,423.83<br>(2,906.84–4,009.32)    |
| Guam                           | All causes | 30,579.13<br>(27,554.47–34,010.76) | 30,053.87<br>(26,952.08–33,572.28) | 29,036.46<br>(25,921.84–32,581.34) | 30,484.57<br>(27,114.97–33,998.86) | 33,433.30<br>(29,683.61–37,291.31) | 33,196.09<br>(29,155.80–37,570.05) |
| Guam                           | Group I    | 3,730.81<br>(3,258.55–4,262.38)    | 3,376.04<br>(2,988.89–3,831.59)    | 3,250.47<br>(2,881.13–3,704.06)    | 3,711.75<br>(3,138.39–4,546.20)    | 4,158.07<br>(3,471.61–5,252.30)    | 3,973.63<br>(3,220.16–4,914.35)    |
| Guam                           | NCD        | 23,707.85<br>(21,222.15–26,430.96) | 23,488.33<br>(20,835.45–26,443.91) | 22,994.82<br>(20,390.36–25,859.54) | 23,848.40<br>(21,125.86–26,585.31) | 26,030.03<br>(23,120.95–29,068.78) | 25,972.72<br>(22,728.95–29,478.71) |
| Guam                           | Injuries   | 3,140.47<br>(2,803.46–3,475.32)    | 3,189.50<br>(2,851.54–3,537.53)    | 2,791.17<br>(2,483.87–3,071.46)    | 2,924.42<br>(2,624.24–3,229.44)    | 3,245.21<br>(2,943.31–3,589.91)    | 3,249.74<br>(2,770.26–3,736.46)    |
| Kiribati                       | All causes | 66,925.07<br>(60,700.43–73,162.98) | 64,417.08<br>(58,893.26–69,899.25) | 62,034.65<br>(57,007.89–67,543.24) | 59,078.65<br>(53,306.69–64,918.15) | 55,879.78<br>(49,397.53–63,333.89) | 52,844.25<br>(46,157.12–59,991.73) |
| Kiribati                       | Group I    | 24,598.54<br>(21,479.48–27,787.28) | 21,743.16<br>(19,517.88–24,197.13) | 18,679.77<br>(16,764.03–21,147.17) | 16,987.78<br>(14,763.44–19,586.57) | 14,739.19<br>(12,026.23–17,998.50) | 12,704.60<br>(9,937.44–16,532.15)  |
| Kiribati                       | NCD        | 37,964.10<br>(33,793.11–42,012.86) | 38,294.09<br>(34,722.44–42,088.34) | 38,919.41<br>(35,179.96–42,946.78) | 37,631.99<br>(33,709.73–41,740.18) | 36,738.80<br>(32,462.61–41,240.78) | 35,908.46<br>(31,313.16–40,476.65) |
| Kiribati                       | Injuries   | 4,362.43<br>(3,719.96–4,970.86)    | 4,379.83<br>(3,838.11–4,940.66)    | 4,435.48<br>(3,801.12–4,991.14)    | 4,458.89<br>(3,627.97–5,157.18)    | 4,401.80<br>(3,454.77–5,265.99)    | 4,231.19<br>(3,227.81–5,128.32)    |
| Marshall Islands               | All causes | 49,287.30<br>(44,309.89–54,779.14) | 47,853.08<br>(43,107.10–52,660.54) | 49,375.05<br>(44,131.06–54,851.11) | 49,316.53<br>(43,729.84–54,442.85) | 46,674.92<br>(41,054.52–52,796.95) | 43,989.74<br>(38,551.29–49,909.20) |
| Marshall Islands               | Group I    | 11,419.98<br>(9,483.03–13,649.19)  | 10,065.58<br>(8,328.67–13,593.41)  | 10,161.20<br>(8,067.86–14,590.08)  | 8,997.14<br>(7,368.81–11,476.86)   | 7,488.48<br>(5,824.58–9,864.33)    | 6,421.16<br>(4,939.98–8,327.95)    |
| Marshall Islands               | NCD        | 33,458.99<br>(29,853.70–37,060.27) | 33,698.70<br>(30,032.55–37,375.78) | 34,957.14<br>(30,595.65–39,049.41) | 36,080.53<br>(31,620.26–40,148.86) | 35,290.55<br>(30,794.25–39,597.53) | 34,003.42<br>(29,478.08–38,499.43) |
| Marshall Islands               | Injuries   | 4,408.32<br>(3,754.46–5,048.38)    | 4,088.80<br>(3,316.13–4,678.44)    | 4,256.70<br>(3,385.95–5,030.84)    | 4,238.86<br>(3,443.83–5,000.13)    | 3,895.90<br>(3,233.99–4,565.37)    | 3,565.16<br>(2,978.82–4,192.94)    |
| Northern Mariana Islands       | All causes | 31,722.41<br>(28,081.58–35,841.60) | 28,431.21<br>(25,043.82–31,903.54) | 26,273.94<br>(23,191.54–29,503.13) | 25,605.46<br>(22,811.70–28,888.55) | 24,908.44<br>(22,084.81–28,146.17) | 25,232.01<br>(22,262.59–28,737.80) |
| Northern Mariana Islands       | Group I    | 4,497.64<br>(3,457.04–6,115.79)    | 3,504.97<br>(2,835.14–4,417.56)    | 2,920.68<br>(2,513.95–3,402.32)    | 2,613.34<br>(2,265.00–3,041.33)    | 2,291.78<br>(1,968.54–2,675.18)    | 2,366.65<br>(1,959.87–2,860.49)    |
| Northern Mariana Islands       | NCD        | 23,951.31<br>(21,236.45–27,210.35) | 22,198.12<br>(19,468.72–25,110.92) | 20,934.50<br>(18,335.78–23,599.36) | 20,520.82<br>(18,048.09–23,220.01) | 20,313.16<br>(17,820.17–23,099.00) | 20,562.97<br>(18,064.37–23,457.92) |
| Northern Mariana Islands       | Injuries   | 3,273.46<br>(2,807.20–3,776.25)    | 2,728.12<br>(2,417.13–3,062.31)    | 2,418.77<br>(2,190.32–2,676.50)    | 2,471.30<br>(2,246.75–2,711.32)    | 2,303.50<br>(2,062.79–2,560.43)    | 2,302.39<br>(2,012.35–2,649.65)    |
| Papua New Guinea               | All causes | 74,212.13<br>(59,221.88–92,221.35) | 71,511.43<br>(55,686.16–89,189.03) | 69,689.71<br>(53,259.01–86,897.37) | 68,885.60<br>(52,452.92–88,276.39) | 65,097.43<br>(49,112.79–85,961.24) | 59,781.65<br>(45,733.54–80,168.43) |
| Papua New Guinea               | Group I    | 25,819.56<br>(21,948.02–30,294.18) | 23,634.10<br>(19,862.05–28,273.52) | 21,617.63<br>(17,367.04–26,182.79) | 20,497.84<br>(16,154.55–25,436.61) | 17,952.89<br>(13,985.96–23,353.81) | 15,166.71<br>(11,851.63–19,931.81) |
| Papua New Guinea               | NCD        | 41,681.69<br>(31,404.13–53,309.67) | 41,394.67<br>(30,990.00–53,558.51) | 41,697.42<br>(30,724.35–53,400.89) | 42,133.84<br>(30,704.46–54,932.96) | 41,224.86<br>(30,591.54–55,885.38) | 39,198.87<br>(29,408.17–52,764.17) |
| Papua New Guinea               | Injuries   | 6,710.89<br>(4,798.77–9,177.20)    | 6,482.66<br>(4,556.75–9,059.45)    | 6,374.67<br>(4,435.68–8,865.29)    | 6,253.92<br>(4,264.24–8,720.81)    | 5,919.69<br>(4,077.07–8,663.25)    | 5,416.06<br>(3,819.92–7,868.09)    |
| Samoa                          | All causes | 37,678.10<br>(32,738.02–43,768.54) | 35,909.39<br>(30,986.97–41,721.32) | 34,447.83<br>(29,824.64–39,785.85) | 32,637.26<br>(28,221.51–37,328.89) | 31,208.24<br>(27,202.98–35,476.55) | 30,274.61<br>(25,633.84–34,806.86) |
| Samoa                          | Group I    | 6,213.01<br>(4,840.82–8,431.54)    | 5,554.82<br>(4,287.83–7,828.06)    | 4,981.94<br>(3,727.78–7,244.49)    | 4,382.12<br>(3,386.60–6,270.93)    | 3,843.82<br>(3,022.19–5,212.39)    | 3,496.53<br>(2,738.70–4,632.86)    |

**Appendix Table 4. Rate of DALYs per 100,000 individuals for all causes and level 1 cause groups by location for 1990 - 2015, both sexes combined.**

|                              | Cause      | 1990                                | 1995                                | 2000                                | 2005                                | 2010                               | 2015                               |
|------------------------------|------------|-------------------------------------|-------------------------------------|-------------------------------------|-------------------------------------|------------------------------------|------------------------------------|
| Samoa                        | NCD        | 28,002.04<br>(23,937.09–32,563.46)  | 27,156.51<br>(23,089.05–31,638.95)  | 26,440.98<br>(22,512.39–30,518.10)  | 25,447.03<br>(21,794.77–29,128.87)  | 24,693.68<br>(21,277.14–28,204.01) | 24,246.51<br>(20,375.58–27,999.31) |
| Samoa                        | Injuries   | 3,463.06<br>(2,727.54–4,255.14)     | 3,198.06<br>(2,441.73–4,026.19)     | 3,024.91<br>(2,354.28–3,753.01)     | 2,808.11<br>(2,268.11–3,360.52)     | 2,670.74<br>(2,213.45–3,180.70)    | 2,531.56<br>(2,056.87–3,066.83)    |
| Solomon Islands              | All causes | 60,683.70<br>(46,808.48–78,074.46)  | 57,542.89<br>(44,313.76–74,329.57)  | 55,899.01<br>(42,955.29–72,262.08)  | 55,705.89<br>(41,753.53–72,258.07)  | 53,130.60<br>(39,226.61–70,897.91) | 49,876.33<br>(36,894.95–68,259.83) |
| Solomon Islands              | Group I    | 14,926.55<br>(11,811.13–18,546.66)  | 12,832.85<br>(10,098.62–16,458.72)  | 11,236.70<br>(8,796.15–14,755.78)   | 10,579.95<br>(8,249.86–13,634.72)   | 8,952.62<br>(6,903.25–11,584.01)   | 7,462.18<br>(5,729.84–9,745.00)    |
| Solomon Islands              | NCD        | 40,330.26<br>(30,195.38–53,227.44)  | 39,600.66<br>(29,557.94–52,205.10)  | 39,561.80<br>(29,312.64–52,116.42)  | 40,147.87<br>(29,469.47–53,093.78)  | 39,448.86<br>(28,707.92–53,748.99) | 38,002.55<br>(27,575.84–52,655.28) |
| Solomon Islands              | Injuries   | 5,426.90<br>(3,813.63–7,455.83)     | 5,109.37<br>(3,544.24–7,065.76)     | 5,100.51<br>(3,456.66–7,098.79)     | 4,978.08<br>(3,351.26–7,068.40)     | 4,729.11<br>(3,280.71–6,747.79)    | 4,411.60<br>(3,107.29–6,442.57)    |
| Tonga                        | All causes | 38,692.22<br>(33,847.94–44,024.12)  | 37,300.84<br>(33,460.63–41,593.10)  | 37,596.92<br>(33,843.52–41,711.61)  | 36,619.39<br>(32,631.97–40,772.80)  | 35,309.31<br>(30,733.84–39,933.73) | 33,716.44<br>(28,994.24–38,841.09) |
| Tonga                        | Group I    | 7,714.63<br>(6,159.96–10,160.26)    | 6,780.40<br>(5,533.02–8,246.22)     | 6,729.08<br>(5,493.99–8,218.91)     | 6,085.86<br>(4,959.28–7,420.50)     | 5,683.35<br>(4,629.46–7,040.39)    | 5,076.94<br>(4,108.25–6,361.50)    |
| Tonga                        | NCD        | 26,901.80<br>(23,550.25–30,595.14)  | 26,534.52<br>(23,689.81–29,703.31)  | 26,957.94<br>(24,274.57–29,888.27)  | 26,732.82<br>(23,791.91–29,842.26)  | 26,047.60<br>(22,763.93–29,455.44) | 25,301.37<br>(21,786.49–29,194.51) |
| Tonga                        | Injuries   | 4,075.79<br>(3,434.99–4,739.74)     | 3,985.91<br>(3,475.79–4,533.22)     | 3,909.90<br>(3,491.76–4,371.66)     | 3,800.70<br>(3,381.70–4,316.98)     | 3,578.36<br>(3,097.07–4,151.26)    | 3,338.13<br>(2,793.51–3,993.68)    |
| Vanuatu                      | All causes | 54,734.10<br>(42,691.99–70,428.72)  | 53,627.82<br>(40,578.52–70,844.50)  | 53,187.38<br>(39,656.61–69,184.15)  | 52,581.37<br>(39,701.09–68,482.81)  | 49,681.50<br>(37,774.31–67,527.37) | 47,158.75<br>(36,541.04–62,921.33) |
| Vanuatu                      | Group I    | 12,473.19<br>(10,036.23–15,555.76)  | 11,491.90<br>(9,085.92–14,871.49)   | 10,987.14<br>(8,793.97–15,083.27)   | 10,704.18<br>(8,560.08–13,559.48)   | 9,081.93<br>(7,302.23–11,963.09)   | 7,773.37<br>(6,092.44–9,981.61)    |
| Vanuatu                      | NCD        | 37,559.36<br>(28,405.00–49,597.75)  | 37,467.26<br>(27,668.04–50,947.23)  | 37,346.81<br>(26,708.78–49,681.18)  | 37,164.32<br>(27,018.09–49,838.10)  | 36,156.30<br>(26,462.97–49,954.38) | 35,008.11<br>(26,229.06–47,434.89) |
| Vanuatu                      | Injuries   | 4,701.55<br>(3,284.93–6,667.27)     | 4,668.65<br>(3,034.16–6,674.18)     | 4,853.43<br>(3,225.13–6,842.24)     | 4,712.88<br>(3,224.87–6,588.43)     | 4,443.26<br>(3,086.56–6,337.73)    | 4,377.27<br>(3,259.02–5,873.41)    |
| North Africa and Middle East | All causes | 47,077.34<br>(43,748.66–50,743.07)  | 43,326.26<br>(39,987.02–46,850.21)  | 39,453.86<br>(36,098.58–42,960.92)  | 36,879.74<br>(33,634.19–40,412.17)  | 34,117.58<br>(30,836.97–37,496.91) | 33,421.27<br>(29,866.62–37,002.48) |
| North Africa and Middle East | Group I    | 12,965.67<br>(11,755.24–13,943.76)  | 11,039.88<br>(10,037.15–11,876.45)  | 9,232.05<br>(8,428.36–9,965.82)     | 7,636.86<br>(6,977.80–8,311.52)     | 6,308.45<br>(5,745.52–6,886.55)    | 5,273.78<br>(4,772.90–5,837.59)    |
| North Africa and Middle East | NCD        | 28,128.33<br>(25,418.19–30,970.79)  | 27,338.57<br>(24,630.80–30,134.51)  | 25,764.75<br>(23,072.78–28,509.13)  | 24,962.52<br>(22,256.70–27,826.27)  | 23,985.77<br>(21,223.60–26,759.75) | 23,244.04<br>(20,547.98–25,929.49) |
| North Africa and Middle East | Injuries   | 5,983.35<br>(5,260.20–6,623.62)     | 4,947.81<br>(4,452.01–5,389.36)     | 4,457.06<br>(4,052.61–4,847.10)     | 4,280.36<br>(3,900.47–4,658.65)     | 3,823.36<br>(3,498.77–4,157.73)    | 4,903.45<br>(4,098.11–5,681.38)    |
| Afghanistan                  | All causes | 96,535.26<br>(84,778.31–109,340.47) | 97,860.13<br>(85,710.05–111,186.40) | 95,441.30<br>(83,832.19–107,905.59) | 88,665.62<br>(77,346.68–101,012.85) | 83,014.54<br>(72,769.27–95,522.86) | 81,984.51<br>(70,997.88–94,545.19) |
| Afghanistan                  | Group I    | 33,184.13<br>(27,620.61–39,177.33)  | 31,435.10<br>(26,573.88–36,735.97)  | 28,699.03<br>(24,186.67–33,537.06)  | 23,444.42<br>(19,979.41–26,649.18)  | 19,859.40<br>(16,782.53–23,036.37) | 16,363.68<br>(13,721.32–19,406.95) |
| Afghanistan                  | NCD        | 47,428.34<br>(38,574.57–56,965.45)  | 49,119.78<br>(40,314.59–58,688.99)  | 50,116.71<br>(41,627.68–59,032.91)  | 49,896.10<br>(41,609.13–58,227.57)  | 48,253.26<br>(40,395.66–56,544.04) | 46,547.42<br>(38,756.33–54,913.44) |
| Afghanistan                  | Injuries   | 15,922.79<br>(12,413.73–19,391.28)  | 17,305.25<br>(13,535.66–20,888.72)  | 16,625.57<br>(13,328.16–20,066.02)  | 15,325.10<br>(12,708.85–18,501.61)  | 14,901.87<br>(12,396.31–17,882.38) | 19,073.42<br>(14,199.44–24,168.78) |
| Algeria                      | All causes | 37,590.27<br>(34,112.84–41,541.11)  | 34,916.59<br>(31,603.70–38,653.42)  | 31,731.60<br>(28,547.36–35,400.32)  | 29,217.46<br>(26,009.40–32,898.54)  | 27,319.87<br>(24,129.87–30,755.14) | 26,554.64<br>(23,276.59–30,003.26) |
| Algeria                      | Group I    | 9,448.00<br>(8,483.49–10,436.17)    | 7,777.63<br>(6,991.42–8,640.18)     | 6,497.11<br>(5,852.13–7,157.52)     | 5,561.67<br>(4,900.46–6,260.10)     | 4,898.99<br>(4,261.04–5,592.62)    | 4,372.19<br>(3,714.49–5,156.99)    |
| Algeria                      | NCD        | 23,937.83<br>(21,288.99–27,165.84)  | 22,803.72<br>(20,108.65–25,877.93)  | 21,761.50<br>(19,128.74–24,693.40)  | 20,778.76<br>(18,120.70–23,658.56)  | 19,850.22<br>(17,231.97–22,614.00) | 19,720.16<br>(17,058.40–22,542.43) |
| Algeria                      | Injuries   | 4,204.45<br>(3,600.24–4,744.76)     | 4,335.24<br>(3,697.53–5,038.16)     | 3,472.98<br>(3,124.52–3,820.84)     | 2,877.03<br>(2,576.91–3,185.50)     | 2,570.66<br>(2,310.39–2,841.99)    | 2,462.29<br>(2,181.77–2,767.21)    |
| Bahrain                      | All causes | 33,878.03<br>(30,088.90–37,983.56)  | 32,106.82<br>(28,436.28–36,017.59)  | 30,776.71<br>(27,126.81–34,394.04)  | 26,664.70<br>(23,512.60–30,289.89)  | 22,967.32<br>(19,750.66–26,534.65) | 22,396.32<br>(18,913.75–26,077.69) |

**Appendix Table 4. Rate of DALYs per 100,000 individuals for all causes and level 1 cause groups by location for 1990 - 2015, both sexes combined.**

|         | Cause      | 1990                               | 1995                               | 2000                               | 2005                               | 2010                               | 2015                               |
|---------|------------|------------------------------------|------------------------------------|------------------------------------|------------------------------------|------------------------------------|------------------------------------|
| Bahrain | Group I    | 4,139.35<br>(3,710.70-4,677.78)    | 3,505.23<br>(3,126.17-4,016.84)    | 2,922.21<br>(2,576.77-3,359.02)    | 2,546.13<br>(2,219.51-2,953.41)    | 2,123.83<br>(1,796.78-2,501.41)    | 1,981.53<br>(1,653.59-2,369.06)    |
| Bahrain | NCD        | 26,273.43<br>(23,180.80-29,657.30) | 25,111.65<br>(22,204.07-28,243.38) | 23,820.92<br>(20,937.12-26,668.20) | 21,651.01<br>(19,043.03-24,593.42) | 19,011.17<br>(16,265.14-21,972.10) | 18,663.04<br>(15,761.94-21,609.51) |
| Bahrain | Injuries   | 3,465.24<br>(3,038.70-3,930.68)    | 3,489.94<br>(3,064.06-3,965.51)    | 4,033.59<br>(3,251.27-4,790.75)    | 2,467.56<br>(2,153.81-2,816.78)    | 1,832.32<br>(1,601.72-2,112.72)    | 1,751.75<br>(1,461.76-2,074.72)    |
| Egypt   | All causes | 48,468.89<br>(45,001.47-52,087.82) | 43,133.30<br>(39,790.57-46,552.74) | 37,933.53<br>(34,809.16-41,338.37) | 36,899.68<br>(33,738.60-40,342.04) | 36,778.39<br>(33,658.37-40,267.33) | 34,129.71<br>(30,588.53-37,883.08) |
| Egypt   | Group I    | 14,483.44<br>(12,775.75-15,647.90) | 10,720.83<br>(9,743.48-11,674.50)  | 7,486.58<br>(6,829.44-8,227.03)    | 6,089.39<br>(5,435.23-6,863.10)    | 5,227.02<br>(4,616.09-5,919.18)    | 4,263.91<br>(3,529.20-5,123.97)    |
| Egypt   | NCD        | 31,395.11<br>(28,631.84-34,093.04) | 29,904.28<br>(27,304.87-32,599.63) | 28,020.57<br>(25,482.65-30,757.43) | 28,571.41<br>(26,030.60-31,356.44) | 29,349.94<br>(26,821.15-32,180.10) | 27,666.34<br>(24,882.81-30,590.09) |
| Egypt   | Injuries   | 2,590.33<br>(2,278.06-3,055.04)    | 2,508.19<br>(2,271.42-2,796.07)    | 2,426.38<br>(2,230.89-2,625.43)    | 2,238.88<br>(2,056.79-2,429.69)    | 2,201.43<br>(2,031.35-2,390.28)    | 2,199.46<br>(1,981.10-2,419.07)    |
| Iran    | All causes | 47,157.92<br>(42,165.77-52,025.12) | 38,376.55<br>(34,151.55-42,786.73) | 35,267.77<br>(31,599.36-39,321.89) | 33,432.45<br>(29,001.06-38,096.00) | 30,148.40<br>(25,822.07-34,899.06) | 28,442.76<br>(24,284.48-32,881.78) |
| Iran    | Group I    | 8,827.13<br>(7,292.20-10,818.73)   | 6,122.15<br>(5,088.20-7,608.99)    | 4,702.71<br>(3,878.39-5,767.59)    | 3,893.64<br>(3,191.72-4,718.14)    | 3,011.85<br>(2,478.64-3,573.09)    | 2,527.87<br>(2,054.67-3,081.37)    |
| Iran    | NCD        | 26,708.81<br>(23,293.39-29,980.52) | 26,044.10<br>(22,609.62-29,433.53) | 24,983.83<br>(21,802.18-28,203.28) | 24,064.28<br>(20,702.67-27,647.36) | 22,647.65<br>(19,160.75-26,362.01) | 22,053.07<br>(18,561.34-25,636.29) |
| Iran    | Injuries   | 11,621.98<br>(8,872.60-14,278.39)  | 6,210.30<br>(5,481.75-7,014.93)    | 5,581.23<br>(5,061.74-6,184.15)    | 5,474.53<br>(4,741.60-6,326.79)    | 4,488.90<br>(3,751.48-5,369.68)    | 3,861.82<br>(3,211.05-4,643.20)    |
| Iraq    | All causes | 47,543.48<br>(42,074.24-53,221.23) | 48,527.48<br>(43,100.66-54,395.70) | 47,180.82<br>(41,702.53-53,210.94) | 47,311.62<br>(41,479.22-54,560.79) | 43,296.05<br>(37,095.47-50,156.24) | 43,363.92<br>(36,875.55-50,311.17) |
| Iraq    | Group I    | 9,612.07<br>(8,479.26-10,765.20)   | 9,217.23<br>(8,207.76-10,385.74)   | 8,014.58<br>(7,131.65-8,897.10)    | 6,868.29<br>(6,088.25-7,651.64)    | 5,883.38<br>(5,151.18-6,633.25)    | 4,830.20<br>(4,112.58-5,586.78)    |
| Iraq    | NCD        | 30,792.96<br>(26,407.66-35,165.08) | 32,152.65<br>(28,029.56-36,757.12) | 32,582.37<br>(28,558.01-37,325.58) | 32,007.37<br>(27,896.42-37,400.40) | 30,899.16<br>(26,445.24-35,975.93) | 29,422.96<br>(24,913.23-34,695.20) |
| Iraq    | Injuries   | 7,138.45<br>(6,050.00-8,336.54)    | 7,157.60<br>(6,104.25-8,299.05)    | 6,583.86<br>(5,553.91-7,637.76)    | 8,435.95<br>(6,792.58-10,132.01)   | 6,513.50<br>(5,295.85-7,717.44)    | 9,110.75<br>(6,494.89-11,545.38)   |
| Jordan  | All causes | 34,725.45<br>(30,875.53-38,869.54) | 32,749.80<br>(29,005.15-37,137.06) | 31,143.70<br>(27,665.26-35,064.32) | 29,103.51<br>(25,843.82-32,780.96) | 24,367.20<br>(21,308.20-27,823.22) | 23,585.85<br>(20,432.93-27,123.11) |
| Jordan  | Group I    | 5,335.73<br>(4,800.60-5,936.83)    | 4,496.93<br>(4,099.84-4,976.96)    | 3,984.83<br>(3,615.92-4,412.26)    | 3,502.83<br>(3,128.78-3,956.95)    | 2,919.90<br>(2,570.20-3,337.44)    | 2,649.41<br>(2,246.96-3,096.58)    |
| Jordan  | NCD        | 25,390.82<br>(22,095.35-28,905.55) | 24,760.86<br>(21,520.27-28,455.97) | 24,047.05<br>(21,103.91-27,337.79) | 22,730.66<br>(19,981.09-25,755.52) | 19,418.49<br>(16,822.11-22,348.86) | 18,879.04<br>(16,112.21-21,769.15) |
| Jordan  | Injuries   | 3,998.89<br>(3,412.82-4,569.42)    | 3,492.01<br>(3,027.02-4,013.29)    | 3,111.81<br>(2,772.14-3,524.68)    | 2,870.02<br>(2,629.54-3,128.26)    | 2,028.81<br>(1,856.99-2,227.76)    | 2,057.40<br>(1,828.90-2,300.13)    |
| Kuwait  | All causes | 25,281.64<br>(22,149.36-28,894.32) | 25,656.60<br>(22,849.34-28,805.75) | 23,781.82<br>(20,905.86-26,954.45) | 23,333.53<br>(20,520.21-26,484.19) | 22,137.55<br>(19,353.84-25,286.62) | 19,951.13<br>(16,962.20-23,313.18) |
| Kuwait  | Group I    | 2,810.40<br>(2,473.86-3,212.83)    | 2,744.38<br>(2,459.40-3,108.34)    | 2,297.35<br>(2,038.65-2,634.33)    | 2,177.67<br>(1,918.03-2,501.47)    | 2,189.14<br>(1,923.39-2,523.67)    | 1,911.08<br>(1,619.64-2,262.22)    |
| Kuwait  | NCD        | 17,938.28<br>(15,552.25-20,477.57) | 19,914.90<br>(17,567.93-22,487.01) | 18,887.54<br>(16,477.63-21,500.67) | 18,679.45<br>(16,225.50-21,258.76) | 17,932.56<br>(15,536.20-20,608.33) | 16,336.11<br>(13,784.37-19,113.70) |
| Kuwait  | Injuries   | 4,532.96<br>(3,020.99-6,190.08)    | 2,997.32<br>(2,729.73-3,328.23)    | 2,596.94<br>(2,342.56-2,896.58)    | 2,476.41<br>(2,264.94-2,731.78)    | 2,015.85<br>(1,806.62-2,254.90)    | 1,703.94<br>(1,466.84-2,000.06)    |
| Lebanon | All causes | 42,232.80<br>(37,326.13-47,864.22) | 33,740.04<br>(29,461.06-38,374.12) | 29,500.11<br>(25,412.77-33,986.82) | 26,476.51<br>(22,386.10-30,580.64) | 24,657.50<br>(20,561.39-28,932.12) | 23,400.33<br>(19,402.95-27,729.78) |
| Lebanon | Group I    | 5,312.23<br>(4,559.66-6,365.69)    | 4,547.47<br>(3,797.15-5,733.71)    | 3,761.33<br>(3,076.67-4,915.77)    | 2,816.26<br>(2,265.91-3,584.65)    | 2,240.62<br>(1,798.42-2,833.53)    | 1,957.99<br>(1,553.91-2,502.79)    |
| Lebanon | NCD        | 25,756.29<br>(22,399.64-29,725.61) | 23,120.10<br>(20,257.70-26,460.01) | 20,664.30<br>(17,729.43-23,695.23) | 19,480.55<br>(16,452.61-22,611.40) | 18,938.75<br>(15,699.64-22,298.13) | 18,378.53<br>(15,063.25-21,756.85) |
| Lebanon | Injuries   | 11,164.28<br>(9,091.10-13,894.70)  | 6,072.48<br>(4,412.97-8,135.87)    | 5,074.48<br>(3,613.00-6,894.52)    | 4,179.71<br>(2,930.81-5,749.27)    | 3,478.13<br>(2,515.08-4,805.56)    | 3,063.81<br>(2,211.16-4,197.35)    |

**Appendix Table 4. Rate of DALYs per 100,000 individuals for all causes and level 1 cause groups by location for 1990 - 2015, both sexes combined.**

|              | Cause      | 1990                               | 1995                               | 2000                               | 2005                               | 2010                               | 2015                               |
|--------------|------------|------------------------------------|------------------------------------|------------------------------------|------------------------------------|------------------------------------|------------------------------------|
| Libya        | All causes | 31,565.50<br>(28,069.52–35,367.80) | 29,394.88<br>(26,253.90–32,877.14) | 28,777.08<br>(25,565.13–32,297.32) | 27,755.17<br>(24,637.21–31,192.84) | 26,735.35<br>(23,544.34–30,166.85) | 30,041.90<br>(26,082.28–34,188.96) |
| Libya        | Group I    | 5,536.71<br>(4,917.44–6,343.51)    | 4,587.99<br>(4,019.51–5,321.23)    | 4,067.30<br>(3,478.10–4,779.37)    | 3,668.27<br>(3,069.75–4,464.69)    | 3,157.12<br>(2,593.36–3,927.62)    | 2,866.09<br>(2,331.67–3,531.60)    |
| Libya        | NCD        | 22,339.06<br>(19,556.94–25,360.69) | 21,471.90<br>(18,780.80–24,458.51) | 21,434.35<br>(18,773.53–24,262.61) | 21,155.07<br>(18,610.12–23,795.85) | 20,783.26<br>(18,130.49–23,597.71) | 21,253.41<br>(18,265.44–24,285.81) |
| Libya        | Injuries   | 3,689.72<br>(3,187.69–4,178.77)    | 3,334.99<br>(2,906.44–3,774.71)    | 3,275.43<br>(2,866.98–3,660.99)    | 2,931.82<br>(2,544.79–3,270.33)    | 2,794.97<br>(2,463.24–3,140.09)    | 5,922.40<br>(3,971.65–7,847.69)    |
| Morocco      | All causes | 43,427.26<br>(39,347.13–47,790.45) | 39,573.12<br>(35,575.81–43,878.49) | 35,640.47<br>(31,475.82–39,979.12) | 33,169.70<br>(28,404.92–37,893.56) | 31,280.26<br>(26,740.89–36,450.89) | 29,793.35<br>(25,165.98–34,821.23) |
| Morocco      | Group I    | 13,012.84<br>(11,732.78–14,062.80) | 10,142.30<br>(9,183.13–11,009.26)  | 8,087.13<br>(7,249.31–8,918.86)    | 6,786.33<br>(5,927.55–7,623.10)    | 5,664.09<br>(4,853.01–6,504.89)    | 4,773.98<br>(3,995.90–5,590.86)    |
| Morocco      | NCD        | 25,958.42<br>(22,818.83–29,278.65) | 25,319.84<br>(22,003.44–28,840.73) | 24,059.65<br>(20,759.71–27,493.47) | 23,285.04<br>(19,465.34–26,875.30) | 22,643.44<br>(18,882.39–26,757.38) | 22,149.26<br>(18,257.28–26,276.63) |
| Morocco      | Injuries   | 4,456.01<br>(3,761.19–5,079.31)    | 4,110.98<br>(3,564.77–4,670.97)    | 3,493.70<br>(3,042.31–4,008.72)    | 3,098.33<br>(2,638.43–3,661.26)    | 2,972.73<br>(2,472.95–3,615.07)    | 2,870.10<br>(2,327.36–3,561.62)    |
| Palestine    | All causes | 35,080.88<br>(30,554.65–40,065.21) | 31,240.49<br>(27,528.11–35,374.38) | 30,259.75<br>(26,738.70–33,883.15) | 29,322.02<br>(26,054.35–32,783.66) | 29,360.61<br>(25,609.35–33,444.98) | 28,613.39<br>(24,485.05–33,067.37) |
| Palestine    | Group I    | 6,199.55<br>(5,494.75–6,893.77)    | 4,822.52<br>(4,287.66–5,387.98)    | 4,256.90<br>(3,800.25–4,741.11)    | 4,062.71<br>(3,620.95–4,580.92)    | 3,765.27<br>(3,326.96–4,245.27)    | 3,382.16<br>(2,835.55–4,028.13)    |
| Palestine    | NCD        | 24,203.01<br>(20,470.21–28,509.73) | 22,803.83<br>(19,664.09–26,267.87) | 21,728.94<br>(19,014.09–24,567.40) | 22,122.91<br>(19,357.68–24,965.10) | 22,786.39<br>(19,588.75–26,262.47) | 22,683.19<br>(19,152.54–26,454.43) |
| Palestine    | Injuries   | 4,678.33<br>(3,552.65–5,881.18)    | 3,614.14<br>(2,700.82–4,524.33)    | 4,273.91<br>(3,110.64–5,473.38)    | 3,136.41<br>(2,427.96–3,884.78)    | 2,808.95<br>(2,200.73–3,467.27)    | 2,548.04<br>(1,996.08–3,163.55)    |
| Oman         | All causes | 34,641.70<br>(29,355.43–40,155.71) | 30,933.05<br>(26,296.32–35,810.05) | 28,279.65<br>(24,421.20–32,244.84) | 27,053.26<br>(23,679.75–30,607.69) | 26,972.45<br>(23,700.45–30,532.01) | 25,338.45<br>(21,516.13–29,120.71) |
| Oman         | Group I    | 7,121.67<br>(6,017.62–8,332.47)    | 5,113.18<br>(4,401.63–5,939.35)    | 3,769.24<br>(3,287.71–4,343.39)    | 3,162.93<br>(2,734.67–3,645.55)    | 3,088.01<br>(2,700.47–3,507.39)    | 2,714.40<br>(2,302.69–3,146.06)    |
| Oman         | NCD        | 22,365.08<br>(18,680.02–26,451.08) | 21,448.32<br>(17,936.51–25,304.32) | 20,906.70<br>(17,698.54–24,250.18) | 20,644.38<br>(17,854.46–23,613.05) | 20,732.50<br>(17,917.87–23,691.64) | 19,724.57<br>(16,530.89–22,937.34) |
| Oman         | Injuries   | 5,154.95<br>(3,932.69–6,379.47)    | 4,371.55<br>(3,521.24–5,322.46)    | 3,603.72<br>(3,086.39–4,210.92)    | 3,245.95<br>(2,937.28–3,567.86)    | 3,151.94<br>(2,872.87–3,434.27)    | 2,899.48<br>(2,451.09–3,397.34)    |
| Qatar        | All causes | 29,458.17<br>(26,125.43–32,963.41) | 29,601.68<br>(26,147.28–33,610.10) | 28,808.24<br>(25,450.58–32,420.73) | 26,341.19<br>(22,824.08–29,947.16) | 22,371.71<br>(19,335.73–25,870.73) | 21,533.41<br>(18,047.40–25,539.42) |
| Qatar        | Group I    | 3,258.74<br>(2,604.13–4,171.78)    | 2,945.94<br>(2,388.07–3,627.13)    | 2,583.77<br>(2,110.94–3,165.20)    | 2,205.00<br>(1,785.95–2,634.75)    | 1,909.98<br>(1,572.69–2,325.73)    | 1,676.14<br>(1,342.23–2,080.62)    |
| Qatar        | NCD        | 21,316.78<br>(18,560.22–24,109.82) | 21,993.46<br>(19,215.46–25,033.64) | 21,706.43<br>(19,019.92–24,589.41) | 20,170.11<br>(17,328.30–23,295.66) | 17,319.91<br>(14,789.51–20,173.01) | 16,956.27<br>(14,170.34–20,171.52) |
| Qatar        | Injuries   | 4,882.65<br>(4,238.83–5,536.88)    | 4,662.27<br>(4,101.38–5,309.63)    | 4,518.05<br>(3,935.93–5,085.93)    | 3,966.08<br>(3,485.79–4,498.05)    | 3,141.82<br>(2,735.60–3,587.45)    | 2,901.00<br>(2,372.15–3,520.05)    |
| Saudi Arabia | All causes | 31,249.00<br>(27,926.67–35,336.69) | 28,220.69<br>(25,170.45–31,513.86) | 25,719.49<br>(22,789.45–28,967.01) | 23,990.00<br>(21,158.33–27,158.52) | 22,566.05<br>(19,786.51–25,639.10) | 21,463.66<br>(18,543.09–24,729.24) |
| Saudi Arabia | Group I    | 6,971.32<br>(5,916.59–7,785.70)    | 5,454.77<br>(4,734.30–6,104.04)    | 4,037.94<br>(3,541.73–4,505.43)    | 3,233.38<br>(2,810.73–3,635.71)    | 2,723.57<br>(2,338.60–3,083.90)    | 2,351.96<br>(1,986.78–2,686.94)    |
| Saudi Arabia | NCD        | 19,148.57<br>(16,355.40–22,008.61) | 18,699.60<br>(16,084.34–21,377.98) | 18,173.36<br>(15,697.33–20,795.01) | 17,651.09<br>(15,150.28–20,271.37) | 17,089.94<br>(14,641.88–19,712.09) | 16,627.83<br>(14,122.80–19,351.12) |
| Saudi Arabia | Injuries   | 5,129.11<br>(4,094.63–7,688.00)    | 4,066.31<br>(3,615.35–4,490.33)    | 3,508.19<br>(3,163.85–3,833.70)    | 3,105.53<br>(2,811.89–3,378.90)    | 2,752.54<br>(2,483.64–2,999.60)    | 2,483.87<br>(2,209.08–2,757.24)    |
| Sudan        | All causes | 65,008.12<br>(58,587.15–71,736.56) | 60,711.47<br>(53,989.18–67,685.26) | 56,048.08<br>(48,992.79–63,977.83) | 50,573.76<br>(43,597.32–57,902.07) | 46,960.73<br>(39,866.78–53,760.19) | 43,547.64<br>(36,653.12–51,346.62) |
| Sudan        | Group I    | 25,393.24<br>(21,759.39–28,993.70) | 22,702.93<br>(19,423.87–26,084.98) | 19,684.77<br>(16,871.83–22,468.74) | 16,151.72<br>(13,840.40–18,530.10) | 13,543.17<br>(11,519.17–15,718.27) | 11,341.78<br>(9,329.81–13,724.89)  |
| Sudan        | NCD        | 31,930.03<br>(27,241.76–37,216.47) | 31,517.96<br>(26,383.20–37,003.19) | 29,904.64<br>(24,636.99–35,588.65) | 28,747.01<br>(23,558.83–34,180.51) | 27,944.91<br>(22,578.41–32,987.21) | 27,190.86<br>(22,208.86–32,627.64) |



**Appendix Table 4. Rate of DALYs per 100,000 individuals for all causes and level 1 cause groups by location for 1990 - 2015, both sexes combined.**

|                      | Cause      | 1990                               | 1995                               | 2000                               | 2005                               | 2010                               | 2015                               |
|----------------------|------------|------------------------------------|------------------------------------|------------------------------------|------------------------------------|------------------------------------|------------------------------------|
| Sudan                | Injuries   | 7,684.85<br>(5,659.48–9,568.59)    | 6,490.58<br>(4,615.39–8,189.50)    | 6,458.67<br>(4,822.82–8,195.35)    | 5,675.03<br>(4,289.82–7,197.96)    | 5,472.66<br>(4,187.23–6,935.30)    | 5,015.00<br>(3,887.58–6,359.40)    |
| Syria                | All causes | 36,020.59<br>(32,281.13–40,275.05) | 31,627.68<br>(27,845.92–35,693.37) | 28,487.58<br>(25,133.61–32,013.15) | 26,482.86<br>(23,670.56–29,698.06) | 25,026.94<br>(22,274.81–28,224.48) | 43,132.03<br>(31,716.32–53,915.54) |
| Syria                | Group I    | 7,842.29<br>(6,945.63–9,098.86)    | 5,791.36<br>(5,080.45–6,708.80)    | 4,154.15<br>(3,654.64–4,811.21)    | 3,540.96<br>(3,063.25–4,183.55)    | 3,174.52<br>(2,777.56–3,679.94)    | 2,931.08<br>(2,508.38–3,447.77)    |
| Syria                | NCD        | 25,449.16<br>(22,271.06–28,940.15) | 23,481.11<br>(20,220.68–26,850.25) | 22,213.42<br>(19,348.93–25,296.31) | 21,113.29<br>(18,660.21–23,854.37) | 20,145.20<br>(17,761.61–22,900.64) | 20,011.15<br>(17,365.17–23,154.77) |
| Syria                | Injuries   | 2,729.14<br>(2,318.38–3,144.07)    | 2,355.21<br>(2,006.19–2,705.95)    | 2,120.02<br>(1,853.62–2,413.10)    | 1,828.60<br>(1,620.01–2,037.06)    | 1,707.22<br>(1,541.75–1,892.14)    | 20,189.80<br>(9,258.61–30,722.90)  |
| Tunisia              | All causes | 34,589.06<br>(31,418.38–38,016.50) | 31,986.03<br>(28,861.59–35,528.75) | 28,613.75<br>(25,372.00–32,249.02) | 26,508.77<br>(23,172.75–30,296.50) | 25,111.23<br>(21,689.61–29,000.02) | 24,231.94<br>(20,613.80–28,145.74) |
| Tunisia              | Group I    | 8,051.31<br>(7,070.58–8,960.06)    | 6,122.49<br>(5,540.83–6,736.52)    | 4,669.19<br>(4,193.33–5,144.98)    | 3,830.23<br>(3,394.49–4,314.10)    | 3,285.97<br>(2,872.58–3,759.01)    | 2,799.66<br>(2,382.88–3,249.40)    |
| Tunisia              | NCD        | 23,179.32<br>(20,502.68–25,858.13) | 22,933.73<br>(20,240.55–25,926.61) | 21,334.21<br>(18,561.32–24,360.35) | 20,388.71<br>(17,521.15–23,658.78) | 19,706.88<br>(16,800.31–23,017.13) | 19,433.68<br>(16,330.76–22,761.30) |
| Tunisia              | Injuries   | 3,358.44<br>(2,926.40–3,829.68)    | 2,929.82<br>(2,590.11–3,310.82)    | 2,610.34<br>(2,305.44–2,935.23)    | 2,289.84<br>(1,979.63–2,622.75)    | 2,118.38<br>(1,811.24–2,466.91)    | 1,998.61<br>(1,686.39–2,390.70)    |
| Turkey               | All causes | 42,594.87<br>(39,203.56–46,309.57) | 38,478.07<br>(35,008.11–42,310.40) | 31,604.51<br>(28,559.04–35,079.04) | 27,216.08<br>(24,230.30–30,505.82) | 23,671.96<br>(20,659.33–26,874.53) | 22,709.06<br>(19,620.08–26,098.36) |
| Turkey               | Group I    | 11,207.54<br>(10,175.98–12,249.82) | 8,998.43<br>(8,119.99–9,967.57)    | 6,218.33<br>(5,570.70–6,980.10)    | 4,382.49<br>(3,781.42–5,104.42)    | 3,358.71<br>(2,748.12–4,097.73)    | 2,787.13<br>(2,183.78–3,493.16)    |
| Turkey               | NCD        | 27,507.09<br>(24,594.84–30,607.32) | 25,806.70<br>(22,920.22–28,889.83) | 22,720.49<br>(20,075.08–25,725.27) | 20,660.92<br>(17,958.07–23,501.00) | 18,518.07<br>(15,946.81–21,342.26) | 18,195.79<br>(15,605.43–21,118.92) |
| Turkey               | Injuries   | 3,880.24<br>(3,277.98–4,386.53)    | 3,672.94<br>(3,253.79–4,059.02)    | 2,665.69<br>(2,413.19–2,935.56)    | 2,172.67<br>(1,980.18–2,381.04)    | 1,795.18<br>(1,639.72–1,955.19)    | 1,726.13<br>(1,556.50–1,924.19)    |
| United Arab Emirates | All causes | 36,013.79<br>(30,725.50–41,611.25) | 33,372.08<br>(29,377.17–37,618.84) | 30,948.14<br>(27,388.73–34,762.46) | 27,662.62<br>(24,315.23–31,252.24) | 26,801.00<br>(23,194.82–30,946.50) | 26,804.14<br>(22,513.50–31,913.04) |
| United Arab Emirates | Group I    | 5,094.07<br>(3,818.80–6,778.68)    | 3,957.09<br>(3,009.14–5,345.01)    | 3,184.36<br>(2,510.06–4,148.25)    | 2,591.25<br>(2,155.53–3,268.82)    | 2,298.98<br>(1,817.14–2,940.89)    | 2,141.49<br>(1,669.33–2,759.45)    |
| United Arab Emirates | NCD        | 25,218.55<br>(21,503.32–29,126.30) | 24,403.31<br>(21,366.64–27,751.29) | 23,291.99<br>(20,475.82–26,363.94) | 21,228.47<br>(18,477.59–24,174.14) | 21,071.97<br>(18,192.82–24,260.33) | 21,376.76<br>(17,929.28–25,368.21) |
| United Arab Emirates | Injuries   | 5,701.17<br>(4,477.33–6,882.36)    | 5,011.69<br>(4,162.16–5,833.22)    | 4,471.80<br>(3,817.80–5,080.21)    | 3,842.91<br>(3,332.36–4,322.03)    | 3,430.06<br>(2,851.83–4,050.84)    | 3,285.89<br>(2,568.08–4,040.99)    |
| Yemen                | All causes | 64,784.77<br>(52,632.30–79,459.63) | 59,623.44<br>(47,859.19–74,706.30) | 54,383.39<br>(43,177.91–68,882.51) | 49,133.38<br>(37,657.87–63,614.64) | 44,384.97<br>(33,727.12–59,606.44) | 46,046.86<br>(36,247.10–60,655.73) |
| Yemen                | Group I    | 23,794.67<br>(19,837.68–27,939.16) | 20,043.04<br>(16,356.30–24,038.89) | 16,521.02<br>(13,569.42–19,817.50) | 12,906.26<br>(10,771.78–15,435.58) | 9,877.94<br>(8,264.52–11,751.03)   | 8,397.91<br>(7,048.28–10,228.26)   |
| Yemen                | NCD        | 34,239.14<br>(25,181.41–45,557.39) | 33,244.12<br>(24,432.13–44,473.08) | 32,164.52<br>(23,713.66–42,983.17) | 30,755.27<br>(21,962.67–41,599.06) | 29,579.74<br>(21,714.61–41,416.00) | 29,441.63<br>(21,803.12–40,483.85) |
| Yemen                | Injuries   | 6,750.96<br>(4,386.95–9,212.95)    | 6,336.28<br>(4,155.44–8,780.50)    | 5,697.85<br>(3,758.77–8,114.04)    | 5,471.84<br>(3,661.48–7,743.01)    | 4,927.29<br>(3,389.94–7,193.56)    | 8,207.32<br>(6,338.14–10,724.69)   |
| South Asia           | All causes | 66,116.09<br>(62,365.24–70,251.84) | 61,269.78<br>(57,651.69–65,322.14) | 56,718.49<br>(53,107.89–60,681.28) | 52,169.88<br>(48,822.52–55,986.85) | 47,505.15<br>(44,182.14–51,154.39) | 43,467.77<br>(40,148.70–47,005.45) |
| South Asia           | Group I    | 31,130.19<br>(29,991.34–32,377.53) | 26,760.67<br>(25,727.36–27,938.47) | 23,237.79<br>(22,257.34–24,311.82) | 20,351.82<br>(19,439.30–21,366.79) | 17,045.92<br>(16,195.20–17,988.55) | 14,206.48<br>(13,407.40–15,087.82) |
| South Asia           | NCD        | 29,360.69<br>(26,624.72–32,103.04) | 29,040.01<br>(26,374.50–31,774.34) | 28,418.90<br>(25,795.66–31,098.21) | 26,924.60<br>(24,364.75–29,615.27) | 26,272.26<br>(23,800.61–28,861.98) | 25,365.80<br>(22,863.86–27,968.79) |
| South Asia           | Injuries   | 5,625.21<br>(4,836.14–6,144.16)    | 5,469.10<br>(4,575.66–5,936.45)    | 5,061.81<br>(4,259.82–5,473.44)    | 4,893.47<br>(4,216.39–5,291.64)    | 4,186.98<br>(3,549.68–4,523.21)    | 3,895.48<br>(3,327.87–4,262.46)    |
| Bangladesh           | All causes | 67,437.29<br>(62,857.03–71,978.15) | 57,537.17<br>(53,507.42–61,922.59) | 49,429.17<br>(45,619.26–53,665.39) | 44,448.82<br>(40,848.78–48,566.68) | 40,414.34<br>(36,816.90–44,514.83) | 37,165.79<br>(33,258.91–41,556.94) |
| Bangladesh           | Group I    | 33,499.38<br>(31,598.56–35,274.41) | 25,126.43<br>(23,688.31–26,624.46) | 18,408.79<br>(17,295.51–19,560.38) | 14,226.17<br>(13,318.20–15,181.16) | 11,089.79<br>(10,322.08–11,898.81) | 9,046.85<br>(8,231.16–9,897.30)    |

**Appendix Table 4. Rate of DALYs per 100,000 individuals for all causes and level 1 cause groups by location for 1990 - 2015, both sexes combined.**

|                             | Cause      | 1990                               | 1995                                | 2000                                 | 2005                                | 2010                                | 2015                                |
|-----------------------------|------------|------------------------------------|-------------------------------------|--------------------------------------|-------------------------------------|-------------------------------------|-------------------------------------|
| Bangladesh                  | NCD        | 27,905.03<br>(24,805.27–31,220.59) | 26,908.82<br>(23,840.15–30,241.41)  | 26,171.70<br>(23,211.02–29,379.07)   | 26,032.40<br>(23,053.23–29,036.27)  | 25,689.03<br>(22,766.92–28,743.90)  | 24,770.63<br>(21,649.16–28,181.69)  |
| Bangladesh                  | Injuries   | 6,032.88<br>(4,711.09–6,980.92)    | 5,501.93<br>(4,223.09–6,337.94)     | 4,848.68<br>(3,640.78–5,609.80)      | 4,190.25<br>(3,246.30–4,762.85)     | 3,635.52<br>(2,915.13–4,082.38)     | 3,348.31<br>(2,668.13–3,872.86)     |
| Bhutan                      | All causes | 58,296.63<br>(52,902.44–64,181.95) | 52,370.97<br>(47,482.84–57,550.47)  | 47,998.20<br>(43,508.73–53,006.05)   | 40,751.26<br>(36,567.20–45,140.38)  | 36,812.57<br>(32,580.94–41,460.95)  | 34,323.79<br>(30,013.71–39,069.88)  |
| Bhutan                      | Group I    | 28,057.43<br>(25,129.64–31,093.06) | 23,140.05<br>(20,786.87–25,766.30)  | 18,792.13<br>(16,784.96–20,976.75)   | 15,743.69<br>(14,040.97–17,619.84)  | 13,152.72<br>(11,577.97–14,786.23)  | 11,138.65<br>(9,744.79–12,736.40)   |
| Bhutan                      | NCD        | 26,148.31<br>(22,492.42–30,372.55) | 25,454.15<br>(21,841.75–29,296.18)  | 23,673.67<br>(20,434.19–27,180.41)   | 22,144.86<br>(19,167.59–25,574.33)  | 21,139.10<br>(18,029.27–24,481.31)  | 20,882.19<br>(17,604.70–24,370.57)  |
| Bhutan                      | Injuries   | 4,090.89<br>(3,173.93–5,122.99)    | 3,776.76<br>(3,004.50–4,643.43)     | 5,532.39<br>(4,439.84–6,708.86)      | 2,862.71<br>(2,413.18–3,301.34)     | 2,520.75<br>(2,119.01–2,947.18)     | 2,302.96<br>(1,895.66–2,736.61)     |
| India                       | All causes | 67,084.47<br>(63,273.95–71,336.52) | 62,311.97<br>(58,564.04–66,422.13)  | 57,884.55<br>(54,242.17–61,877.94)   | 52,742.87<br>(49,333.41–56,639.50)  | 48,058.31<br>(44,720.11–51,785.76)  | 43,720.92<br>(40,361.76–47,330.32)  |
| India                       | Group I    | 31,349.05<br>(30,143.57–32,719.68) | 27,251.14<br>(26,144.87–28,552.04)  | 23,964.42<br>(22,873.20–25,189.50)   | 21,116.14<br>(20,148.51–22,229.46)  | 17,608.24<br>(16,726.85–18,624.08)  | 14,565.94<br>(13,656.02–15,531.68)  |
| India                       | NCD        | 29,904.64<br>(27,178.24–32,735.68) | 29,357.33<br>(26,674.96–32,125.01)  | 28,648.55<br>(26,008.75–31,356.83)   | 26,870.30<br>(24,333.82–29,582.78)  | 26,163.39<br>(23,765.43–28,857.08)  | 25,199.14<br>(22,651.45–27,850.22)  |
| India                       | Injuries   | 5,830.78<br>(5,071.23–6,367.88)    | 5,703.49<br>(4,796.78–6,207.79)     | 5,271.58<br>(4,457.56–5,700.67)      | 4,756.43<br>(4,046.69–5,125.15)     | 4,286.69<br>(3,626.18–4,649.36)     | 3,955.84<br>(3,352.29–4,350.64)     |
| Nepal                       | All causes | 65,128.25<br>(59,833.14–70,782.02) | 56,482.80<br>(52,313.52–61,140.81)  | 48,131.42<br>(44,350.75–52,105.90)   | 43,192.10<br>(39,498.81–47,434.09)  | 39,279.62<br>(34,963.43–43,828.63)  | 38,148.21<br>(33,438.67–43,025.62)  |
| Nepal                       | Group I    | 35,746.77<br>(33,364.69–38,375.77) | 28,373.85<br>(26,568.93–30,182.02)  | 21,938.93<br>(20,436.27–23,440.53)   | 17,945.60<br>(16,364.64–19,505.16)  | 14,665.77<br>(13,046.23–16,242.58)  | 11,804.96<br>(10,390.18–13,374.95)  |
| Nepal                       | NCD        | 25,274.71<br>(21,670.79–29,093.53) | 24,251.05<br>(21,104.90–27,589.88)  | 22,728.45<br>(19,865.10–25,759.89)   | 21,805.46<br>(18,899.71–24,955.23)  | 21,712.12<br>(18,445.01–25,076.55)  | 21,593.34<br>(18,125.16–25,260.10)  |
| Nepal                       | Injuries   | 4,106.77<br>(3,387.05–4,809.06)    | 3,857.90<br>(3,188.21–4,468.78)     | 3,464.03<br>(2,921.29–4,034.35)      | 3,441.04<br>(2,888.47–4,072.95)     | 2,901.74<br>(2,357.52–3,552.70)     | 4,749.91<br>(3,717.97–5,863.48)     |
| Pakistan                    | All causes | 56,105.37<br>(51,868.34–60,448.82) | 56,424.22<br>(51,915.49–61,649.00)  | 55,016.97<br>(50,317.87–59,675.50)   | 55,545.44<br>(51,066.70–60,351.99)  | 49,855.31<br>(44,972.09–54,986.98)  | 46,675.49<br>(42,084.56–52,053.36)  |
| Pakistan                    | Group I    | 26,005.31<br>(24,687.72–27,523.31) | 23,788.97<br>(22,565.67–25,167.65)  | 21,763.27<br>(20,730.14–22,890.65)   | 19,741.71<br>(18,666.64–20,883.61)  | 17,350.09<br>(16,204.96–18,530.46)  | 15,097.76<br>(13,959.32–16,382.29)  |
| Pakistan                    | NCD        | 26,583.23<br>(23,534.41–29,656.53) | 29,025.62<br>(25,672.19–32,634.83)  | 29,555.52<br>(26,077.33–32,861.59)   | 29,143.27<br>(25,747.55–32,589.98)  | 28,496.50<br>(24,869.31–32,292.05)  | 27,899.46<br>(24,316.80–31,861.75)  |
| Pakistan                    | Injuries   | 3,516.82<br>(2,954.18–4,103.49)    | 3,609.62<br>(3,071.94–4,182.18)     | 3,698.18<br>(3,133.89–4,262.97)      | 6,660.47<br>(5,226.31–8,087.35)     | 4,008.72<br>(3,434.19–4,609.43)     | 3,678.27<br>(3,163.45–4,282.88)     |
| Sub-Saharan Africa          | All causes | 80,691.44<br>(76,254.02–85,747.96) | 80,216.86<br>(75,877.59–85,111.77)  | 81,347.50<br>(77,093.32–86,022.94)   | 75,317.01<br>(71,341.81–79,981.55)  | 64,733.70<br>(60,483.77–69,738.78)  | 56,551.71<br>(52,272.75–61,475.97)  |
| Sub-Saharan Africa          | Group I    | 46,840.13<br>(44,584.55–49,423.60) | 47,997.27<br>(45,921.84–50,247.35)  | 48,899.78<br>(46,887.80–51,049.55)   | 45,272.24<br>(43,451.85–47,348.15)  | 36,224.44<br>(34,582.97–38,267.06)  | 28,137.94<br>(26,510.02–30,227.04)  |
| Sub-Saharan Africa          | NCD        | 27,448.76<br>(24,670.93–30,368.13) | 26,748.92<br>(24,143.54–29,667.95)  | 26,720.35<br>(24,043.29–29,566.31)   | 25,454.40<br>(22,866.04–28,341.77)  | 24,269.50<br>(21,694.11–27,223.09)  | 24,200.21<br>(21,514.66–27,271.30)  |
| Sub-Saharan Africa          | Injuries   | 6,402.55<br>(5,646.80–7,111.33)    | 5,470.67<br>(4,915.13–6,003.95)     | 5,727.36<br>(5,160.99–6,282.16)      | 4,590.38<br>(4,171.92–4,985.65)     | 4,239.77<br>(3,867.92–4,629.50)     | 4,213.56<br>(3,811.46–4,649.68)     |
| Southern Sub-Saharan Africa | All causes | 54,780.29<br>(51,131.03–58,813.58) | 57,899.24<br>(53,960.87–62,357.13)  | 78,158.06<br>(73,061.13–83,901.26)   | 89,843.65<br>(83,981.40–95,919.10)  | 80,084.90<br>(75,188.46–85,623.03)  | 60,163.61<br>(55,686.04–65,226.12)  |
| Southern Sub-Saharan Africa | Group I    | 20,242.23<br>(19,051.02–21,871.19) | 24,502.50<br>(22,688.08–26,851.20)  | 40,304.20<br>(37,435.96–43,556.43)   | 54,141.72<br>(50,956.98–57,769.32)  | 48,337.84<br>(45,653.38–51,419.59)  | 29,292.52<br>(27,707.16–31,096.00)  |
| Southern Sub-Saharan Africa | NCD        | 27,228.76<br>(24,496.29–30,087.49) | 26,613.54<br>(23,833.82–29,672.27)  | 30,397.89<br>(27,257.79–33,974.55)   | 29,064.83<br>(25,547.45–32,854.20)  | 26,195.61<br>(23,040.74–29,991.81)  | 25,590.41<br>(22,534.26–28,714.70)  |
| Southern Sub-Saharan Africa | Injuries   | 7,309.29<br>(6,545.43–7,970.72)    | 6,783.20<br>(6,072.95–7,467.76)     | 7,455.96<br>(6,655.42–8,268.05)      | 6,637.10<br>(5,806.47–7,522.21)     | 5,551.45<br>(4,926.94–6,343.52)     | 5,280.68<br>(4,721.73–5,955.35)     |
| Botswana                    | All causes | 54,942.21<br>(33,500.70–99,978.82) | 70,850.94<br>(40,889.85–130,816.08) | 105,477.39<br>(58,188.42–188,350.19) | 98,865.34<br>(56,958.47–176,848.05) | 75,290.22<br>(44,713.96–145,398.57) | 65,852.12<br>(40,519.51–130,297.68) |

**Appendix Table 4. Rate of DALYs per 100,000 individuals for all causes and level 1 cause groups by location for 1990 - 2015, both sexes combined.**

|                            | Cause      | 1990                               | 1995                               | 2000                                 | 2005                                  | 2010                                 | 2015                                 |
|----------------------------|------------|------------------------------------|------------------------------------|--------------------------------------|---------------------------------------|--------------------------------------|--------------------------------------|
| Botswana                   | Group I    | 23,355.50<br>(15,210.82–39,424.75) | 36,917.39<br>(21,713.10–59,229.79) | 65,912.00<br>(38,812.62–98,527.40)   | 58,880.38<br>(37,400.77–85,173.85)    | 39,582.99<br>(25,004.88–60,288.98)   | 32,094.34<br>(20,682.18–48,067.75)   |
| Botswana                   | NCD        | 27,214.43<br>(15,590.26–50,555.88) | 29,051.95<br>(15,461.01–62,770.53) | 33,298.45<br>(15,798.62–76,621.69)   | 33,458.44<br>(15,842.29–75,886.79)    | 30,051.96<br>(15,820.86–68,805.21)   | 28,615.75<br>(15,953.81–66,989.94)   |
| Botswana                   | Injuries   | 4,372.28<br>(2,147.75–9,453.71)    | 4,881.59<br>(2,174.37–12,340.85)   | 6,266.94<br>(2,288.86–18,414.42)     | 6,526.53<br>(2,305.89–18,827.48)      | 5,655.26<br>(2,223.58–17,267.05)     | 5,142.03<br>(2,175.45–16,172.01)     |
| Lesotho                    | All causes | 59,025.17<br>(51,300.27–67,899.65) | 64,040.42<br>(55,921.75–72,138.07) | 89,795.62<br>(78,004.81–104,431.51)  | 125,170.53<br>(109,283.28–142,863.98) | 108,696.46<br>(90,542.36–129,652.25) | 106,744.95<br>(82,943.78–136,690.35) |
| Lesotho                    | Group I    | 28,450.57<br>(25,027.47–33,285.56) | 33,358.29<br>(29,824.16–38,071.30) | 55,804.25<br>(47,882.39–66,723.90)   | 81,316.01<br>(70,249.43–94,649.86)    | 64,691.24<br>(56,503.80–74,193.58)   | 61,523.60<br>(51,614.06–73,988.23)   |
| Lesotho                    | NCD        | 25,299.94<br>(20,568.97–30,566.72) | 25,127.00<br>(19,595.40–30,057.75) | 27,742.54<br>(22,319.26–34,710.72)   | 35,645.36<br>(29,659.47–43,580.04)    | 35,514.25<br>(26,806.13–46,579.95)   | 36,608.46<br>(24,736.21–52,754.43)   |
| Lesotho                    | Injuries   | 5,274.66<br>(4,131.30–6,659.89)    | 5,555.13<br>(4,125.66–6,982.46)    | 6,248.83<br>(4,578.39–8,215.14)      | 8,209.16<br>(6,025.55–10,649.90)      | 8,490.97<br>(5,382.96–12,438.23)     | 8,612.88<br>(4,411.40–14,535.92)     |
| Namibia                    | All causes | 56,384.21<br>(50,689.73–61,848.62) | 59,908.79<br>(53,825.73–66,420.40) | 80,141.33<br>(70,466.15–91,525.72)   | 82,677.54<br>(72,051.23–94,983.30)    | 57,397.00<br>(48,395.06–67,699.38)   | 50,815.81<br>(40,694.89–63,617.97)   |
| Namibia                    | Group I    | 25,288.41<br>(22,877.00–28,107.71) | 27,305.85<br>(24,452.97–30,796.38) | 41,823.47<br>(36,182.95–48,873.92)   | 48,961.29<br>(42,512.98–56,754.00)    | 30,676.27<br>(26,413.97–36,788.23)   | 25,716.00<br>(21,380.58–30,730.02)   |
| Namibia                    | NCD        | 25,702.36<br>(22,001.52–29,222.06) | 27,165.55<br>(23,333.90–30,935.33) | 31,621.86<br>(26,234.94–37,436.26)   | 31,621.86<br>(22,455.01–34,758.51)    | 22,296.14<br>(17,308.68–27,875.93)   | 21,118.54<br>(15,789.81–28,030.89)   |
| Namibia                    | Injuries   | 5,393.44<br>(4,487.29–6,305.64)    | 5,437.39<br>(4,533.90–6,517.37)    | 6,696.00<br>(5,278.55–8,459.32)      | 5,670.47<br>(4,251.77–7,590.32)       | 4,424.59<br>(2,995.81–5,871.05)      | 3,981.27<br>(2,488.17–6,189.14)      |
| South Africa               | All causes | 55,047.30<br>(51,353.14–59,104.54) | 53,773.02<br>(50,387.31–57,739.51) | 71,151.06<br>(66,388.62–76,387.89)   | 82,805.79<br>(76,895.82–88,988.44)    | 75,815.00<br>(70,558.92–81,504.11)   | 57,336.56<br>(53,154.44–61,805.12)   |
| South Africa               | Group I    | 18,434.37<br>(17,365.85–20,090.19) | 18,682.67<br>(17,536.00–20,479.42) | 31,780.53<br>(29,385.84–34,710.13)   | 47,182.82<br>(43,725.55–51,212.81)    | 44,821.89<br>(41,636.90–48,465.27)   | 26,516.25<br>(24,881.41–28,477.50)   |
| South Africa               | NCD        | 28,079.00<br>(25,180.65–31,096.23) | 27,296.55<br>(24,614.19–30,210.08) | 31,000.83<br>(27,718.53–34,646.68)   | 28,539.04<br>(24,846.42–32,726.56)    | 25,296.37<br>(21,982.84–28,998.61)   | 25,292.42<br>(22,415.25–28,263.92)   |
| South Africa               | Injuries   | 8,533.93<br>(7,601.75–9,287.17)    | 7,793.80<br>(6,892.47–8,443.06)    | 8,369.69<br>(7,439.21–9,172.96)      | 7,083.92<br>(6,134.39–8,110.86)       | 5,696.73<br>(4,936.07–6,546.15)      | 5,527.89<br>(4,924.86–6,169.11)      |
| Swaziland                  | All causes | 59,113.18<br>(48,891.23–69,809.06) | 63,588.20<br>(52,635.90–74,422.52) | 98,682.30<br>(83,578.93–116,140.69)  | 130,692.86<br>(111,349.20–153,455.13) | 110,247.72<br>(88,864.64–134,501.60) | 88,875.38<br>(65,636.28–116,849.08)  |
| Swaziland                  | Group I    | 24,215.45<br>(20,674.10–28,656.63) | 32,538.48<br>(28,015.76–39,006.73) | 60,281.06<br>(50,303.38–73,985.57)   | 83,565.38<br>(70,663.08–99,314.55)    | 65,471.45<br>(56,003.96–77,356.18)   | 46,915.63<br>(39,094.95–56,445.25)   |
| Swaziland                  | NCD        | 28,718.91<br>(22,584.97–34,926.12) | 25,776.04<br>(18,846.20–32,427.78) | 31,673.70<br>(24,134.00–41,023.63)   | 38,854.88<br>(29,713.97–50,714.76)    | 36,878.09<br>(24,852.56–51,688.15)   | 34,590.04<br>(21,325.86–51,500.27)   |
| Swaziland                  | Injuries   | 6,178.82<br>(4,507.46–8,212.02)    | 5,273.68<br>(3,402.43–7,057.39)    | 6,727.54<br>(4,521.59–9,464.70)      | 8,272.59<br>(5,519.58–12,059.51)      | 7,898.19<br>(4,347.15–12,773.25)     | 7,369.71<br>(3,414.85–13,175.48)     |
| Zimbabwe                   | All causes | 52,705.99<br>(46,754.07–58,997.90) | 72,227.64<br>(60,435.14–86,619.30) | 102,526.10<br>(85,800.87–121,390.38) | 116,617.99<br>(101,328.65–131,920.16) | 97,308.79<br>(86,376.63–108,757.71)  | 62,775.02<br>(50,753.14–76,971.84)   |
| Zimbabwe                   | Group I    | 25,467.38<br>(22,713.87–29,735.40) | 45,512.99<br>(37,713.41–56,708.62) | 71,199.33<br>(58,909.00–86,445.76)   | 82,312.06<br>(71,298.47–94,382.23)    | 63,877.30<br>(58,194.05–69,813.59)   | 34,292.95<br>(29,646.99–39,758.59)   |
| Zimbabwe                   | NCD        | 23,257.30<br>(19,324.13–27,238.92) | 22,760.95<br>(16,875.56–30,090.52) | 26,632.12<br>(20,567.51–35,685.07)   | 29,212.99<br>(22,485.90–37,238.30)    | 28,381.26<br>(22,312.42–35,341.26)   | 24,182.51<br>(17,583.58–32,536.25)   |
| Zimbabwe                   | Injuries   | 3,981.31<br>(2,997.51–5,283.09)    | 3,953.71<br>(2,536.61–6,138.93)    | 4,694.65<br>(3,021.03–7,363.54)      | 5,092.94<br>(3,339.75–7,325.23)       | 5,050.22<br>(3,540.67–6,724.66)      | 4,299.56<br>(2,672.91–6,335.68)      |
| Western Sub-Saharan Africa | All causes | 78,550.36<br>(72,711.67–85,528.89) | 76,875.97<br>(72,391.83–82,145.85) | 75,794.06<br>(71,616.17–80,706.38)   | 70,773.75<br>(66,415.75–75,745.20)    | 61,516.53<br>(57,017.00–66,534.30)   | 54,904.59<br>(50,083.64–61,151.27)   |
| Western Sub-Saharan Africa | Group I    | 48,561.64<br>(45,385.40–52,107.03) | 47,529.82<br>(44,978.59–50,164.61) | 46,674.97<br>(44,223.18–49,150.71)   | 43,180.73<br>(40,892.41–45,349.73)    | 35,262.84<br>(33,343.95–37,286.60)   | 28,761.99<br>(26,706.81–31,207.63)   |
| Western Sub-Saharan Africa | NCD        | 25,242.54<br>(21,692.60–29,163.61) | 24,666.67<br>(21,776.76–27,882.86) | 24,633.31<br>(21,741.32–27,711.32)   | 23,698.88<br>(20,891.42–26,773.38)    | 22,655.46<br>(19,626.87–25,818.89)   | 22,463.11<br>(19,444.65–25,927.11)   |
| Western Sub-Saharan Africa | Injuries   | 4,746.17<br>(4,023.08–5,529.68)    | 4,679.48<br>(4,118.09–5,279.11)    | 4,485.78<br>(3,902.33–5,036.53)      | 3,894.14<br>(3,422.43–4,390.59)       | 3,598.23<br>(3,165.46–4,068.23)      | 3,679.49<br>(3,201.54–4,201.05)      |

**Appendix Table 4. Rate of DALYs per 100,000 individuals for all causes and level 1 cause groups by location for 1990 - 2015, both sexes combined.**

|               | Cause      | 1990                               | 1995                               | 2000                               | 2005                               | 2010                               | 2015                               |
|---------------|------------|------------------------------------|------------------------------------|------------------------------------|------------------------------------|------------------------------------|------------------------------------|
| Benin         | All causes | 72,984.12<br>(67,027.15–79,285.90) | 70,607.35<br>(64,525.82–76,545.05) | 68,844.82<br>(61,941.17–76,274.09) | 64,520.77<br>(55,462.94–74,943.97) | 58,504.48<br>(46,546.09–74,192.02) | 54,197.91<br>(40,681.68–72,933.29) |
| Benin         | Group I    | 43,355.90<br>(40,125.68–47,254.61) | 40,585.02<br>(37,518.68–44,026.83) | 38,148.91<br>(35,041.50–41,525.16) | 34,508.74<br>(30,832.82–38,584.97) | 28,462.93<br>(23,906.07–33,735.95) | 23,895.44<br>(19,051.47–30,245.93) |
| Benin         | NCD        | 24,641.10<br>(21,188.55–28,437.71) | 24,871.74<br>(21,320.93–28,398.93) | 25,666.87<br>(21,603.12–30,112.84) | 25,693.09<br>(20,787.96–31,568.31) | 25,944.84<br>(19,471.04–35,014.89) | 26,289.45<br>(18,414.56–37,374.51) |
| Benin         | Injuries   | 4,987.12<br>(3,777.62–6,276.71)    | 5,150.58<br>(4,123.96–6,157.52)    | 5,029.04<br>(4,007.26–6,018.79)    | 4,318.94<br>(3,323.31–5,501.91)    | 4,096.71<br>(2,819.35–5,703.12)    | 4,013.03<br>(2,635.48–6,143.02)    |
| Burkina Faso  | All causes | 86,724.25<br>(79,845.05–93,856.54) | 86,775.39<br>(79,815.24–93,888.60) | 82,621.41<br>(76,231.09–89,812.54) | 72,458.79<br>(65,604.44–80,481.40) | 63,120.11<br>(54,181.74–73,613.49) | 57,763.94<br>(46,384.11–73,423.50) |
| Burkina Faso  | Group I    | 57,333.98<br>(53,315.31–61,176.68) | 58,001.52<br>(54,121.32–61,741.98) | 54,022.38<br>(50,598.48–57,707.78) | 45,470.95<br>(41,998.38–49,133.48) | 36,473.52<br>(32,669.45–41,217.30) | 30,102.58<br>(25,388.85–36,778.30) |
| Burkina Faso  | NCD        | 24,128.22<br>(20,704.37–27,758.97) | 23,709.17<br>(20,197.06–27,254.89) | 23,870.00<br>(20,502.58–27,731.14) | 22,819.23<br>(19,104.94–27,093.15) | 22,738.33<br>(17,952.96–28,040.23) | 23,555.36<br>(17,279.54–31,777.36) |
| Burkina Faso  | Injuries   | 5,262.05<br>(4,356.36–6,213.14)    | 5,064.69<br>(4,240.66–5,909.30)    | 4,729.02<br>(4,014.93–5,544.19)    | 4,168.60<br>(3,492.21–4,963.97)    | 3,908.26<br>(3,041.80–4,862.85)    | 4,106.00<br>(2,979.58–5,588.08)    |
| Cameroon      | All causes | 66,400.24<br>(60,790.15–72,500.15) | 71,086.68<br>(64,620.60–78,023.49) | 77,650.67<br>(69,834.67–86,329.78) | 75,741.73<br>(67,291.16–84,707.08) | 66,929.26<br>(56,999.83–77,635.70) | 62,233.01<br>(49,502.23–79,361.41) |
| Cameroon      | Group I    | 36,271.87<br>(33,611.23–39,304.99) | 40,492.90<br>(37,216.85–44,083.79) | 45,399.71<br>(41,612.65–49,356.26) | 44,137.97<br>(40,592.69–48,003.73) | 36,389.99<br>(32,422.34–40,407.96) | 31,781.08<br>(26,688.32–37,459.68) |
| Cameroon      | NCD        | 25,717.55<br>(22,482.23–29,225.07) | 25,921.03<br>(22,247.79–29,994.26) | 27,584.34<br>(22,600.80–32,573.94) | 27,218.84<br>(22,295.03–32,697.16) | 26,315.29<br>(20,507.23–32,999.88) | 26,122.57<br>(18,708.46–36,505.40) |
| Cameroon      | Injuries   | 4,410.82<br>(3,600.68–5,207.63)    | 4,672.75<br>(3,812.73–5,546.44)    | 4,666.62<br>(3,657.88–5,702.05)    | 4,384.92<br>(3,451.92–5,409.47)    | 4,223.98<br>(3,138.42–5,390.59)    | 4,329.36<br>(3,030.45–6,086.81)    |
| Cape Verde    | All causes | 40,465.09<br>(37,175.12–43,817.59) | 41,045.91<br>(36,104.04–46,440.41) | 40,512.95<br>(33,634.02–47,867.84) | 38,541.52<br>(32,457.67–44,610.89) | 34,900.40<br>(31,648.43–38,575.24) | 31,771.67<br>(27,849.41–36,319.34) |
| Cape Verde    | Group I    | 13,959.46<br>(13,040.20–15,033.11) | 13,096.29<br>(11,930.28–14,487.33) | 11,906.78<br>(10,445.74–13,483.56) | 10,342.54<br>(9,241.78–11,525.13)  | 8,607.94<br>(7,908.68–9,417.10)    | 7,610.23<br>(6,890.14–8,440.11)    |
| Cape Verde    | NCD        | 23,530.15<br>(21,110.76–26,247.50) | 24,132.09<br>(20,611.75–28,055.11) | 23,807.94<br>(19,027.29–28,964.02) | 23,497.34<br>(19,355.31–27,798.32) | 22,096.47<br>(19,594.52–24,865.90) | 20,577.18<br>(17,514.26–23,899.26) |
| Cape Verde    | Injuries   | 2,975.48<br>(2,589.25–3,455.63)    | 3,817.54<br>(3,129.45–4,508.17)    | 4,798.23<br>(3,412.93–6,415.71)    | 4,701.64<br>(3,534.65–6,062.02)    | 4,195.99<br>(3,566.94–4,697.93)    | 3,584.26<br>(2,923.78–4,382.87)    |
| Chad          | All causes | 80,290.04<br>(74,252.19–86,736.02) | 80,211.03<br>(73,280.70–87,097.22) | 86,366.72<br>(77,717.85–95,133.28) | 81,696.08<br>(70,257.81–96,319.68) | 73,355.80<br>(57,941.30–91,114.51) | 68,545.99<br>(52,784.62–89,004.97) |
| Chad          | Group I    | 51,233.29<br>(47,707.81–54,953.70) | 52,306.68<br>(48,300.25–56,291.30) | 54,396.38<br>(50,103.44–59,265.01) | 50,943.87<br>(45,207.78–57,580.78) | 42,111.98<br>(35,416.43–50,083.78) | 37,443.59<br>(30,896.60–46,019.41) |
| Chad          | NCD        | 22,618.72<br>(19,243.05–26,234.83) | 22,801.67<br>(19,208.64–26,560.75) | 25,479.32<br>(21,111.35–30,015.64) | 25,157.30<br>(19,581.87–32,276.89) | 25,649.37<br>(18,136.02–34,880.50) | 25,645.95<br>(17,434.47–36,560.37) |
| Chad          | Injuries   | 6,438.03<br>(4,831.31–9,020.57)    | 5,102.68<br>(4,076.77–6,912.17)    | 6,491.02<br>(5,242.31–7,933.76)    | 5,594.91<br>(4,159.45–7,442.83)    | 5,594.45<br>(3,910.00–7,742.07)    | 5,456.44<br>(3,830.42–7,794.10)    |
| Cote d'Ivoire | All causes | 75,439.18<br>(68,499.43–82,628.05) | 83,710.54<br>(74,938.05–92,162.64) | 84,953.21<br>(76,849.91–93,984.99) | 80,183.79<br>(72,345.60–88,615.98) | 70,143.88<br>(60,102.61–82,163.40) | 62,891.27<br>(50,290.04–79,438.95) |
| Cote d'Ivoire | Group I    | 43,044.67<br>(39,931.60–46,363.44) | 48,222.75<br>(44,569.74–52,438.27) | 49,862.32<br>(45,981.24–53,954.74) | 47,571.22<br>(43,896.96–51,292.63) | 39,476.72<br>(35,697.74–43,860.80) | 32,225.52<br>(27,560.31–38,078.24) |
| Cote d'Ivoire | NCD        | 27,389.33<br>(23,434.74–31,593.56) | 29,832.66<br>(24,409.42–35,030.89) | 29,557.10<br>(24,569.12–35,674.29) | 27,830.51<br>(23,097.79–33,303.72) | 26,283.14<br>(20,404.88–33,182.03) | 26,408.44<br>(19,255.96–35,913.56) |
| Cote d'Ivoire | Injuries   | 5,005.18<br>(4,152.39–5,935.87)    | 5,655.13<br>(4,559.63–6,750.76)    | 5,533.79<br>(4,459.92–6,724.67)    | 4,782.06<br>(3,841.30–5,837.81)    | 4,384.03<br>(3,188.97–5,650.24)    | 4,257.31<br>(2,859.19–6,247.79)    |
| The Gambia    | All causes | 57,372.21<br>(45,692.43–72,937.24) | 54,114.63<br>(45,282.49–64,574.40) | 51,234.87<br>(45,234.70–57,315.77) | 48,091.55<br>(42,393.79–53,840.28) | 44,391.47<br>(38,545.84–50,400.65) | 40,849.12<br>(33,671.75–49,875.60) |
| The Gambia    | Group I    | 29,259.94<br>(24,722.28–35,209.06) | 26,824.62<br>(23,509.98–30,811.27) | 24,424.95<br>(22,240.55–26,842.39) | 21,728.79<br>(19,721.28–23,789.33) | 16,013.27<br>(17,054.52–21,055.79) | 16,097.21<br>(13,867.25–18,854.38) |
| The Gambia    | NCD        | 24,384.17<br>(17,810.61–32,968.81) | 23,675.94<br>(18,438.33–29,935.33) | 23,252.13<br>(19,368.57–26,992.93) | 22,953.82<br>(19,359.16–26,576.30) | 22,267.13<br>(18,453.83–26,149.60) | 21,848.74<br>(17,318.86–27,602.09) |

**Appendix Table 4. Rate of DALYs per 100,000 individuals for all causes and level 1 cause groups by location for 1990 - 2015, both sexes combined.**

|               | Cause      | 1990                                 | 1995                                | 2000                                | 2005                                | 2010                                | 2015                                |
|---------------|------------|--------------------------------------|-------------------------------------|-------------------------------------|-------------------------------------|-------------------------------------|-------------------------------------|
| The Gambia    | Injuries   | 3,728.09<br>(2,779.42–4,979.18)      | 3,614.07<br>(2,854.49–4,560.70)     | 3,557.79<br>(2,982.94–4,184.37)     | 3,408.94<br>(2,867.63–4,020.22)     | 3,111.07<br>(2,558.19–3,752.41)     | 2,903.17<br>(2,249.53–3,829.36)     |
| Ghana         | All causes | 66,193.13<br>(56,326.46–78,540.02)   | 60,760.18<br>(53,785.88–68,365.20)  | 60,216.57<br>(52,714.59–68,419.68)  | 57,930.68<br>(49,218.17–67,142.80)  | 52,515.07<br>(41,361.01–65,731.50)  | 46,529.82<br>(35,166.41–62,268.70)  |
| Ghana         | Group I    | 35,267.03<br>(31,217.78–39,849.64)   | 32,311.71<br>(29,747.14–35,176.35)  | 31,437.82<br>(28,846.13–34,408.45)  | 29,443.81<br>(26,504.82–32,683.72)  | 24,590.22<br>(20,966.72–28,960.47)  | 18,626.92<br>(15,181.02–22,983.52)  |
| Ghana         | NCD        | 26,636.62<br>(21,058.21–33,540.99)   | 24,508.30<br>(20,484.09–29,060.94)  | 25,145.05<br>(20,617.08–30,281.28)  | 24,845.41<br>(19,613.17–30,256.34)  | 24,481.23<br>(17,702.96–32,563.46)  | 24,492.27<br>(17,352.79–34,276.27)  |
| Ghana         | Injuries   | 4,289.48<br>(3,349.81–5,519.21)      | 3,940.16<br>(3,285.67–4,764.96)     | 3,633.70<br>(2,933.17–4,452.03)     | 3,641.46<br>(2,848.93–4,566.93)     | 3,443.62<br>(2,422.85–4,758.13)     | 3,410.63<br>(2,342.19–4,983.30)     |
| Guinea        | All causes | 85,274.99<br>(79,061.66–91,404.52)   | 80,397.58<br>(75,113.16–86,694.41)  | 77,377.34<br>(71,250.14–83,868.25)  | 71,857.46<br>(65,259.68–78,824.55)  | 66,422.33<br>(58,326.80–74,310.90)  | 62,825.88<br>(51,095.27–77,402.10)  |
| Guinea        | Group I    | 54,055.52<br>(50,343.88–58,055.88)   | 49,497.19<br>(46,501.28–52,873.46)  | 46,090.20<br>(42,800.80–49,331.80)  | 41,915.89<br>(38,611.48–45,329.08)  | 36,065.85<br>(32,644.66–39,574.51)  | 32,128.97<br>(27,354.29–37,643.54)  |
| Guinea        | NCD        | 26,517.09<br>(22,793.64–30,513.18)   | 26,130.61<br>(22,672.47–29,802.05)  | 26,516.40<br>(22,871.29–30,561.15)  | 25,776.02<br>(21,885.58–29,923.73)  | 26,268.21<br>(21,703.06–31,174.22)  | 26,747.73<br>(19,966.97–35,139.19)  |
| Guinea        | Injuries   | 4,702.38<br>(3,592.24–5,809.46)      | 4,769.78<br>(3,781.26–5,742.49)     | 4,770.73<br>(3,867.57–5,738.31)     | 4,165.56<br>(3,429.94–4,970.81)     | 4,088.28<br>(3,210.47–4,988.42)     | 3,949.18<br>(2,798.01–5,417.61)     |
| Guinea-Bissau | All causes | 85,720.30<br>(63,176.44–133,572.14)  | 82,774.19<br>(59,474.53–136,327.23) | 81,363.65<br>(56,988.69–132,127.40) | 80,834.44<br>(54,445.54–134,465.75) | 76,599.85<br>(51,390.44–128,935.81) | 72,481.72<br>(47,802.19–137,827.58) |
| Guinea-Bissau | Group I    | 51,656.04<br>(42,004.85–70,504.01)   | 48,508.63<br>(38,754.27–69,420.03)  | 46,585.99<br>(35,885.71–67,208.43)  | 44,538.10<br>(33,095.77–64,818.04)  | 39,896.27<br>(29,503.09–57,716.80)  | 36,451.13<br>(26,726.33–57,729.58)  |
| Guinea-Bissau | NCD        | 28,702.84<br>(16,651.01–52,939.31)   | 28,523.92<br>(16,162.63–54,841.92)  | 28,963.62<br>(16,224.94–54,702.00)  | 30,295.40<br>(16,501.07–59,069.16)  | 30,701.59<br>(16,866.58–60,138.24)  | 30,458.40<br>(16,750.33–67,569.92)  |
| Guinea-Bissau | Injuries   | 5,361.42<br>(3,140.44–9,544.39)      | 5,741.64<br>(3,409.99–10,790.17)    | 5,814.04<br>(3,345.68–11,009.00)    | 6,000.94<br>(3,345.49–11,868.85)    | 6,001.99<br>(3,368.22–12,067.40)    | 5,572.20<br>(3,111.67–12,491.58)    |
| Liberia       | All causes | 97,142.45<br>(85,300.09–109,745.54)  | 89,890.82<br>(81,559.51–98,919.75)  | 74,970.80<br>(68,605.68–81,892.84)  | 67,356.49<br>(60,521.50–74,337.61)  | 60,241.51<br>(52,196.80–68,470.93)  | 53,750.39<br>(44,566.85–65,676.69)  |
| Liberia       | Group I    | 56,343.28<br>(50,979.78–62,038.58)   | 56,374.86<br>(52,103.56–61,557.87)  | 49,409.26<br>(45,449.77–53,750.50)  | 41,780.60<br>(38,108.23–45,532.82)  | 33,936.02<br>(30,329.71–37,955.73)  | 28,090.27<br>(24,078.98–33,377.41)  |
| Liberia       | NCD        | 25,130.53<br>(20,262.75–30,584.90)   | 22,481.70<br>(18,644.60–26,405.72)  | 21,329.81<br>(17,889.00–25,409.89)  | 21,901.59<br>(18,286.32–25,878.48)  | 22,734.95<br>(18,534.41–27,007.55)  | 22,339.63<br>(17,265.52–28,462.35)  |
| Liberia       | Injuries   | 15,668.64<br>(8,762.94–24,038.50)    | 11,034.26<br>(6,694.82–16,107.80)   | 4,231.73<br>(3,429.01–5,159.97)     | 3,674.31<br>(3,033.50–4,420.50)     | 3,570.54<br>(2,862.56–4,423.68)     | 3,320.49<br>(2,482.75–4,409.53)     |
| Mali          | All causes | 91,934.59<br>(85,991.28–97,916.61)   | 87,308.08<br>(81,365.16–93,193.10)  | 80,798.15<br>(75,287.60–86,772.80)  | 71,004.07<br>(65,162.44–77,923.85)  | 64,014.28<br>(57,602.29–71,398.96)  | 60,760.77<br>(51,253.42–72,828.83)  |
| Mali          | Group I    | 58,541.77<br>(54,574.97–62,442.93)   | 55,029.25<br>(51,417.12–58,632.76)  | 49,542.00<br>(46,246.10–53,037.92)  | 43,392.56<br>(40,492.54–46,713.94)  | 36,719.10<br>(33,535.43–40,241.32)  | 33,130.35<br>(28,988.01–38,282.84)  |
| Mali          | NCD        | 27,897.35<br>(24,134.85–31,696.47)   | 27,199.03<br>(23,512.35–30,903.94)  | 25,330.21<br>(21,492.25–29,218.49)  | 23,241.77<br>(19,591.68–27,039.64)  | 23,109.19<br>(19,221.96–27,512.90)  | 23,534.12<br>(18,248.15–30,916.68)  |
| Mali          | Injuries   | 5,495.47<br>(4,443.76–6,574.35)      | 5,079.80<br>(4,165.79–6,111.90)     | 5,925.94<br>(4,747.92–7,450.48)     | 4,369.74<br>(3,592.95–5,291.47)     | 4,185.99<br>(3,344.35–5,131.13)     | 4,096.30<br>(3,195.66–5,321.07)     |
| Mauritania    | All causes | 63,335.63<br>(57,739.81–69,735.87)   | 58,628.00<br>(53,109.07–64,699.49)  | 52,381.74<br>(47,371.38–58,143.97)  | 46,857.87<br>(41,528.08–52,758.26)  | 41,773.53<br>(35,832.86–48,686.76)  | 39,080.40<br>(31,282.31–48,219.39)  |
| Mauritania    | Group I    | 31,866.90<br>(29,389.91–34,851.26)   | 29,449.27<br>(27,006.52–32,621.35)  | 25,674.15<br>(23,374.80–28,841.10)  | 22,359.99<br>(20,205.88–25,313.78)  | 18,255.50<br>(16,058.07–20,797.82)  | 15,423.02<br>(13,001.06–18,389.52)  |
| Mauritania    | NCD        | 26,389.80<br>(22,808.96–30,283.94)   | 25,119.25<br>(21,671.36–28,855.89)  | 22,916.32<br>(19,303.53–26,641.05)  | 21,014.54<br>(17,210.40–24,935.67)  | 20,381.10<br>(16,513.32–24,803.82)  | 20,603.50<br>(15,643.57–26,575.94)  |
| Mauritania    | Injuries   | 5,078.93<br>(3,967.10–6,364.53)      | 4,059.49<br>(3,241.14–4,862.87)     | 3,791.27<br>(3,075.28–4,484.23)     | 3,483.34<br>(2,738.26–4,250.74)     | 3,136.93<br>(2,443.95–4,027.58)     | 3,053.88<br>(2,239.81–4,226.84)     |
| Niger         | All causes | 101,452.34<br>(95,556.87–108,161.07) | 93,329.13<br>(87,375.39–100,199.06) | 83,499.21<br>(78,103.97–89,423.29)  | 72,492.80<br>(67,136.57–78,807.86)  | 63,025.62<br>(55,958.17–71,220.22)  | 57,942.09<br>(48,031.23–70,182.17)  |
| Niger         | Group I    | 71,009.22<br>(66,630.70–75,461.87)   | 64,747.05<br>(60,819.98–69,064.62)  | 56,212.37<br>(52,505.90–59,810.70)  | 46,211.98<br>(43,140.45–49,674.19)  | 37,351.15<br>(34,011.44–41,004.87)  | 31,058.91<br>(26,728.11–36,739.55)  |

**Appendix Table 4. Rate of DALYs per 100,000 individuals for all causes and level 1 cause groups by location for 1990 - 2015, both sexes combined.**

|                            | Cause      | 1990                                 | 1995                                  | 2000                                 | 2005                               | 2010                               | 2015                               |
|----------------------------|------------|--------------------------------------|---------------------------------------|--------------------------------------|------------------------------------|------------------------------------|------------------------------------|
| Niger                      | NCD        | 24,392.66<br>(20,766.31–28,543.59)   | 23,066.33<br>(19,569.05–27,221.95)    | 22,186.79<br>(18,835.00–25,654.07)   | 21,746.59<br>(18,385.40–25,483.91) | 21,545.97<br>(17,718.66–25,696.41) | 22,349.26<br>(16,998.75–28,811.76) |
| Niger                      | Injuries   | 6,050.45<br>(4,634.28–7,653.77)      | 5,515.76<br>(4,362.68–6,860.42)       | 5,100.05<br>(4,170.25–6,224.46)      | 4,534.24<br>(3,642.98–5,536.91)    | 4,128.51<br>(3,224.12–5,169.60)    | 4,533.92<br>(3,385.49–6,020.04)    |
| Nigeria                    | All causes | 79,233.19<br>(69,652.23–91,350.87)   | 76,659.61<br>(69,943.99–84,765.17)    | 75,774.57<br>(69,761.72–82,522.33)   | 71,170.41<br>(64,923.82–77,923.28) | 59,890.28<br>(53,588.24–66,792.99) | 51,571.14<br>(44,656.12–61,048.84) |
| Nigeria                    | Group I    | 50,362.70<br>(45,328.14–56,325.45)   | 48,819.83<br>(44,981.87–53,242.52)    | 48,427.08<br>(44,865.18–52,172.18)   | 45,758.49<br>(42,197.12–49,197.63) | 36,769.90<br>(33,731.43–40,155.85) | 28,892.80<br>(25,377.41–33,069.54) |
| Nigeria                    | NCD        | 24,580.16<br>(19,320.58–31,283.05)   | 23,659.57<br>(19,797.36–28,256.24)    | 23,317.55<br>(19,778.44–27,143.50)   | 22,040.44<br>(18,390.87–25,976.37) | 20,115.16<br>(16,267.79–24,107.93) | 19,482.31<br>(15,710.24–24,699.04) |
| Nigeria                    | Injuries   | 4,290.33<br>(3,265.86–5,630.39)      | 4,180.22<br>(3,405.83–5,116.34)       | 4,029.94<br>(3,312.44–4,817.85)      | 3,371.48<br>(2,793.63–4,063.57)    | 3,005.21<br>(2,501.07–3,646.16)    | 3,196.02<br>(2,589.40–4,052.84)    |
| Sao Tome and Principe      | All causes | 52,740.65<br>(47,872.65–57,969.41)   | 51,002.05<br>(45,521.04–56,942.28)    | 49,284.83<br>(44,244.30–54,939.22)   | 47,030.02<br>(41,179.35–53,617.07) | 43,685.47<br>(35,309.32–54,021.21) | 41,299.95<br>(30,748.96–54,888.36) |
| Sao Tome and Principe      | Group I    | 23,428.95<br>(21,523.71–25,693.91)   | 21,255.28<br>(19,379.79–23,540.75)    | 18,529.66<br>(16,828.00–20,499.95)   | 15,857.59<br>(14,028.51–18,170.88) | 13,320.05<br>(11,296.90–15,987.10) | 11,648.70<br>(9,163.42–14,659.97)  |
| Sao Tome and Principe      | NCD        | 25,933.55<br>(22,619.76–29,531.13)   | 26,438.46<br>(22,708.49–30,397.57)    | 27,508.29<br>(23,840.32–31,391.69)   | 28,036.93<br>(23,983.43–32,667.55) | 27,492.38<br>(21,257.27–34,799.36) | 26,951.46<br>(19,135.57–37,060.67) |
| Sao Tome and Principe      | Injuries   | 3,378.15<br>(2,774.57–3,935.70)      | 3,308.31<br>(2,780.36–3,878.24)       | 3,246.87<br>(2,768.67–3,833.04)      | 3,135.50<br>(2,580.77–3,817.00)    | 2,873.03<br>(2,159.66–3,803.74)    | 2,699.79<br>(1,805.27–3,972.57)    |
| Senegal                    | All causes | 66,733.55<br>(60,913.81–72,946.32)   | 64,870.80<br>(58,709.15–70,898.12)    | 61,402.24<br>(55,566.31–68,146.49)   | 54,988.00<br>(47,336.66–64,263.34) | 49,827.89<br>(38,896.25–64,395.42) | 46,699.50<br>(34,369.64–63,974.98) |
| Senegal                    | Group I    | 38,273.85<br>(35,628.14–41,088.38)   | 36,564.97<br>(33,900.03–39,192.20)    | 33,543.98<br>(30,921.52–36,369.61)   | 27,544.41<br>(24,465.84–31,187.36) | 22,372.09<br>(18,451.44–27,851.18) | 18,750.35<br>(14,535.04–25,291.52) |
| Senegal                    | NCD        | 24,137.94<br>(20,746.90–27,845.86)   | 23,884.44<br>(20,386.06–27,265.48)    | 23,810.70<br>(20,338.51–27,649.45)   | 23,618.98<br>(19,301.46–28,830.47) | 23,867.56<br>(17,470.09–31,603.98) | 24,399.35<br>(17,061.44–34,078.64) |
| Senegal                    | Injuries   | 4,321.77<br>(3,619.75–5,123.41)      | 4,421.39<br>(3,788.19–5,183.87)       | 4,047.56<br>(3,368.74–4,804.18)      | 3,824.61<br>(3,000.12–4,856.12)    | 3,588.24<br>(2,570.16–5,092.07)    | 3,549.80<br>(2,408.95–5,330.23)    |
| Sierra Leone               | All causes | 86,510.07<br>(76,747.15–98,558.47)   | 88,547.66<br>(80,957.66–97,394.36)    | 86,425.70<br>(79,965.79–93,400.33)   | 83,847.91<br>(77,710.01–90,597.78) | 74,758.80<br>(66,933.41–83,080.48) | 67,927.72<br>(56,823.21–82,427.50) |
| Sierra Leone               | Group I    | 53,682.97<br>(47,875.49–59,231.20)   | 51,303.43<br>(47,017.53–55,706.79)    | 51,810.54<br>(47,344.89–55,813.22)   | 49,100.35<br>(45,330.01–52,959.88) | 40,552.55<br>(36,753.69–44,053.90) | 34,946.36<br>(30,366.55–40,063.30) |
| Sierra Leone               | NCD        | 27,910.18<br>(22,329.68–34,576.89)   | 27,186.52<br>(22,745.25–32,503.80)    | 28,100.40<br>(23,948.04–33,105.32)   | 29,837.69<br>(25,760.50–34,428.22) | 29,648.77<br>(24,861.04–34,661.76) | 28,726.73<br>(21,941.70–37,492.30) |
| Sierra Leone               | Injuries   | 4,916.93<br>(3,492.97–6,414.13)      | 10,057.71<br>(6,573.66–14,340.24)     | 6,514.76<br>(5,047.64–8,187.00)      | 4,909.88<br>(3,854.28–5,922.66)    | 4,557.48<br>(3,583.13–5,643.06)    | 4,254.64<br>(3,114.21–5,804.55)    |
| Togo                       | All causes | 66,839.53<br>(60,987.47–73,180.62)   | 67,178.10<br>(60,829.51–74,164.69)    | 69,629.01<br>(62,173.27–77,490.25)   | 69,243.97<br>(61,166.21–77,858.90) | 63,723.61<br>(55,056.72–73,072.70) | 56,003.24<br>(45,069.61–68,811.36) |
| Togo                       | Group I    | 36,302.95<br>(33,844.74–38,930.79)   | 36,578.30<br>(33,767.92–39,464.71)    | 38,331.20<br>(35,172.05–42,098.62)   | 38,278.53<br>(34,856.99–41,930.63) | 33,642.39<br>(30,205.54–37,283.13) | 26,495.61<br>(22,732.88–31,049.51) |
| Togo                       | NCD        | 26,322.04<br>(22,655.06–30,343.70)   | 26,206.85<br>(22,424.29–30,446.97)    | 26,800.66<br>(22,168.17–31,521.45)   | 26,219.00<br>(21,625.44–31,405.27) | 25,941.46<br>(21,064.35–31,408.95) | 25,617.67<br>(19,391.71–33,656.35) |
| Togo                       | Injuries   | 4,214.55<br>(3,543.63–4,969.99)      | 4,392.95<br>(3,707.06–5,171.89)       | 4,497.15<br>(3,668.49–5,381.23)      | 4,746.44<br>(3,849.28–5,801.17)    | 4,139.75<br>(3,185.02–5,195.22)    | 3,889.96<br>(2,729.10–5,472.21)    |
| Eastern Sub-Saharan Africa | All causes | 88,488.53<br>(83,260.92–93,823.68)   | 87,822.41<br>(82,632.09–93,025.05)    | 85,870.95<br>(80,819.89–90,710.43)   | 74,288.83<br>(69,817.42–79,123.88) | 61,380.59<br>(56,175.74–67,045.41) | 54,266.06<br>(48,564.98–60,831.77) |
| Eastern Sub-Saharan Africa | Group I    | 51,510.82<br>(49,329.71–53,996.44)   | 53,809.70<br>(51,570.77–56,146.09)    | 52,527.85<br>(50,280.97–54,864.23)   | 44,401.93<br>(42,438.21–46,667.19) | 32,825.32<br>(30,819.80–35,021.40) | 25,718.64<br>(23,651.93–28,009.51) |
| Eastern Sub-Saharan Africa | NCD        | 29,094.09<br>(26,121.44–32,144.84)   | 28,202.61<br>(25,291.48–31,377.30)    | 26,890.84<br>(24,122.00–29,663.60)   | 25,284.87<br>(22,594.70–28,173.94) | 24,193.61<br>(21,185.08–27,415.39) | 24,242.01<br>(20,793.93–28,049.56) |
| Eastern Sub-Saharan Africa | Injuries   | 7,883.62<br>(6,666.83–9,144.53)      | 5,810.10<br>(5,112.95–6,420.76)       | 6,452.25<br>(5,511.12–7,465.43)      | 4,602.03<br>(4,162.61–5,075.99)    | 4,361.66<br>(3,883.81–5,006.66)    | 4,305.41<br>(3,708.41–5,095.94)    |
| Burundi                    | All causes | 111,055.37<br>(87,596.99–135,087.41) | 115,943.90<br>(100,364.84–130,903.90) | 105,024.59<br>(93,775.95–116,518.84) | 75,755.89<br>(67,743.43–84,646.04) | 58,541.51<br>(49,552.85–69,450.57) | 55,603.12<br>(42,679.76–72,320.35) |

**Appendix Table 4. Rate of DALYs per 100,000 individuals for all causes and level 1 cause groups by location for 1990 - 2015, both sexes combined.**

|            | Cause      | 1990                                  | 1995                                | 2000                                 | 2005                               | 2010                               | 2015                               |
|------------|------------|---------------------------------------|-------------------------------------|--------------------------------------|------------------------------------|------------------------------------|------------------------------------|
| Burundi    | Group I    | 61,480.16<br>(50,655.87-73,873.54)    | 65,444.03<br>(57,505.80-73,756.40)  | 61,864.17<br>(56,097.35-68,220.22)   | 42,902.99<br>(39,237.35-47,211.36) | 29,883.95<br>(26,091.39-34,643.12) | 25,543.24<br>(19,946.10-32,436.90) |
| Burundi    | NCD        | 41,296.33<br>(29,766.21-52,350.28)    | 40,836.84<br>(33,015.42-48,403.48)  | 34,438.29<br>(28,820.96-40,181.90)   | 27,243.80<br>(22,936.29-31,806.90) | 24,174.24<br>(19,370.43-29,800.65) | 25,237.90<br>(18,487.05-34,063.49) |
| Burundi    | Injuries   | 8,278.89<br>(5,439.03-11,279.37)      | 9,663.02<br>(7,145.57-11,955.43)    | 8,722.12<br>(6,765.92-10,933.02)     | 5,609.11<br>(4,506.70-6,926.88)    | 4,483.32<br>(3,397.54-6,010.32)    | 4,821.98<br>(3,385.14-6,870.53)    |
| Comoros    | All causes | 68,947.98<br>(54,346.00-88,238.28)    | 63,801.52<br>(53,722.66-75,968.12)  | 55,227.98<br>(48,527.01-62,495.04)   | 46,056.71<br>(40,036.97-52,100.49) | 41,906.96<br>(35,389.08-48,834.06) | 40,822.02<br>(32,195.14-51,838.30) |
| Comoros    | Group I    | 33,374.88<br>(28,122.11-40,531.72)    | 29,721.65<br>(25,759.72-34,275.23)  | 25,304.02<br>(22,277.06-28,589.73)   | 20,037.66<br>(17,042.57-23,068.33) | 16,782.59<br>(13,898.86-20,028.07) | 15,115.15<br>(11,877.42-19,276.36) |
| Comoros    | NCD        | 30,062.64<br>(21,702.22-40,189.90)    | 28,917.60<br>(23,313.35-35,498.25)  | 25,594.09<br>(21,817.59-29,683.39)   | 22,237.17<br>(18,800.54-25,854.71) | 21,727.32<br>(18,144.00-25,383.83) | 22,303.08<br>(17,133.11-28,479.02) |
| Comoros    | Injuries   | 5,510.47<br>(3,808.16-8,014.06)       | 5,162.28<br>(3,908.16-6,748.80)     | 4,329.87<br>(3,433.38-5,420.56)      | 3,781.88<br>(2,985.53-4,682.72)    | 3,397.04<br>(2,647.98-4,481.43)    | 3,403.79<br>(2,384.77-4,993.24)    |
| Djibouti   | All causes | 58,427.36<br>(48,094.69-72,257.96)    | 59,743.52<br>(47,231.99-78,001.64)  | 60,800.23<br>(45,411.58-84,111.75)   | 58,955.16<br>(43,754.48-81,205.71) | 54,813.84<br>(40,328.63-77,371.93) | 51,359.82<br>(37,632.09-72,268.80) |
| Djibouti   | Group I    | 27,241.67<br>(23,571.77-32,105.61)    | 27,961.60<br>(23,555.21-34,322.23)  | 29,036.80<br>(23,450.85-36,763.54)   | 27,377.64<br>(22,079.27-34,630.60) | 23,611.71<br>(18,715.73-30,123.02) | 20,553.63<br>(16,003.72-26,512.63) |
| Djibouti   | NCD        | 25,897.90<br>(19,825.51-34,219.77)    | 26,344.15<br>(19,123.68-36,654.97)  | 26,489.90<br>(17,979.75-39,258.28)   | 26,486.61<br>(17,950.11-39,294.65) | 26,262.35<br>(17,754.20-39,761.94) | 25,983.36<br>(17,916.50-38,511.39) |
| Djibouti   | Injuries   | 5,287.79<br>(3,883.19-6,965.53)       | 5,437.77<br>(3,724.90-7,904.81)     | 5,273.53<br>(3,335.60-8,601.46)      | 5,090.92<br>(3,254.56-8,277.17)    | 4,939.78<br>(3,185.25-8,022.54)    | 4,822.83<br>(3,094.19-7,939.23)    |
| Eritrea    | All causes | 84,199.53<br>(75,757.28-93,385.54)    | 67,227.05<br>(57,148.06-78,216.05)  | 150,525.86<br>(93,409.06-214,086.08) | 61,492.99<br>(44,584.12-83,625.31) | 60,835.19<br>(43,282.84-86,852.43) | 58,979.72<br>(40,256.27-87,164.91) |
| Eritrea    | Group I    | 47,031.92<br>(42,893.15-51,858.11)    | 36,053.88<br>(31,649.88-40,930.40)  | 31,367.19<br>(25,177.69-38,276.62)   | 29,283.38<br>(22,540.92-38,627.93) | 27,630.50<br>(20,391.87-38,750.92) | 25,514.99<br>(18,342.28-36,657.41) |
| Eritrea    | NCD        | 31,161.73<br>(26,556.32-36,026.16)    | 26,279.83<br>(21,304.12-31,826.68)  | 25,688.27<br>(18,372.14-34,194.86)   | 26,508.46<br>(17,798.48-37,746.66) | 27,478.38<br>(18,310.90-40,456.67) | 27,849.07<br>(18,505.93-42,351.58) |
| Eritrea    | Injuries   | 6,005.87<br>(4,674.45-7,312.38)       | 4,893.34<br>(3,712.78-6,362.50)     | 93,470.39<br>(38,829.04-155,985.15)  | 5,701.15<br>(4,131.07-8,267.21)    | 5,726.31<br>(3,903.45-8,925.37)    | 5,615.66<br>(3,622.42-8,822.20)    |
| Ethiopia   | All causes | 110,167.68<br>(101,424.57-119,656.81) | 94,214.66<br>(87,212.66-101,434.68) | 84,120.70<br>(77,176.92-91,461.00)   | 71,172.26<br>(64,910.22-77,935.24) | 54,518.92<br>(46,139.80-64,059.72) | 47,099.80<br>(36,546.70-60,314.21) |
| Ethiopia   | Group I    | 61,403.25<br>(56,945.25-66,533.10)    | 56,958.60<br>(52,972.40-61,261.43)  | 50,579.32<br>(46,733.82-54,475.98)   | 40,462.27<br>(37,616.89-43,703.96) | 27,007.87<br>(23,650.80-30,598.41) | 20,200.72<br>(16,532.23-24,917.86) |
| Ethiopia   | NCD        | 34,790.28<br>(30,134.81-39,372.65)    | 30,793.50<br>(27,072.84-35,065.75)  | 28,112.44<br>(24,342.72-32,034.79)   | 26,078.37<br>(22,507.69-29,911.74) | 23,481.18<br>(18,734.93-28,857.89) | 23,118.07<br>(17,124.41-30,579.56) |
| Ethiopia   | Injuries   | 13,974.15<br>(9,607.37-18,704.24)     | 6,462.57<br>(5,111.84-7,679.62)     | 5,428.93<br>(4,404.83-6,427.09)      | 4,631.62<br>(3,802.56-5,437.44)    | 4,029.87<br>(3,095.31-5,129.40)    | 3,781.00<br>(2,642.88-5,500.55)    |
| Kenya      | All causes | 56,744.38<br>(52,203.63-61,896.46)    | 66,810.77<br>(61,591.80-72,348.78)  | 74,242.33<br>(68,973.86-80,403.83)   | 69,444.63<br>(64,582.85-75,146.85) | 54,424.07<br>(49,545.51-59,898.56) | 48,634.39<br>(43,912.72-53,902.40) |
| Kenya      | Group I    | 31,411.43<br>(29,319.35-33,870.16)    | 40,993.40<br>(38,505.38-43,923.85)  | 49,462.99<br>(46,739.92-52,726.08)   | 45,569.40<br>(43,151.92-48,631.02) | 30,829.95<br>(28,552.49-34,079.20) | 24,874.33<br>(22,878.47-27,460.21) |
| Kenya      | NCD        | 20,968.78<br>(18,407.33-23,901.51)    | 21,563.61<br>(18,771.00-24,444.83)  | 20,785.39<br>(18,041.10-23,727.32)   | 20,092.62<br>(17,558.68-22,864.44) | 19,844.11<br>(17,299.46-22,486.56) | 20,044.99<br>(17,363.83-22,742.97) |
| Kenya      | Injuries   | 4,364.17<br>(3,749.61-5,180.03)       | 4,253.77<br>(3,698.09-4,944.77)     | 3,993.95<br>(3,505.72-4,590.49)      | 3,782.61<br>(3,343.80-4,339.95)    | 3,750.01<br>(3,297.27-4,298.39)    | 3,715.07<br>(3,214.93-4,280.00)    |
| Madagascar | All causes | 73,436.39<br>(67,693.73-79,141.62)    | 69,843.00<br>(64,534.58-75,836.83)  | 64,297.17<br>(58,860.45-70,333.39)   | 58,515.16<br>(52,260.04-66,303.71) | 54,968.83<br>(45,097.61-66,547.15) | 51,942.13<br>(39,271.30-67,151.36) |
| Madagascar | Group I    | 38,338.53<br>(35,681.05-41,625.91)    | 36,205.41<br>(33,173.56-42,199.72)  | 31,695.12<br>(28,518.77-38,542.40)   | 27,033.78<br>(24,036.61-33,328.13) | 23,904.53<br>(20,005.44-29,405.73) | 20,736.85<br>(16,485.26-26,514.56) |
| Madagascar | NCD        | 30,700.53<br>(27,185.41-34,171.32)    | 29,629.23<br>(25,036.67-33,610.79)  | 28,814.30<br>(23,161.32-33,125.61)   | 28,049.43<br>(22,540.97-33,232.37) | 27,712.02<br>(21,252.20-34,984.22) | 27,860.18<br>(19,897.89-37,560.96) |
| Madagascar | Injuries   | 4,397.32<br>(3,589.62-5,138.56)       | 4,008.36<br>(3,017.18-4,801.30)     | 3,787.75<br>(2,660.18-4,614.94)      | 3,431.94<br>(2,440.90-4,253.79)    | 3,352.27<br>(2,377.15-4,411.95)    | 3,345.10<br>(2,241.64-4,774.56)    |

**Appendix Table 4. Rate of DALYs per 100,000 individuals for all causes and level 1 cause groups by location for 1990 - 2015, both sexes combined.**

|             | Cause      | 1990                                | 1995                                  | 2000                                 | 2005                                | 2010                                | 2015                                |
|-------------|------------|-------------------------------------|---------------------------------------|--------------------------------------|-------------------------------------|-------------------------------------|-------------------------------------|
| Malawi      | All causes | 94,703.59<br>(86,726.65–103,534.36) | 102,163.82<br>(90,419.11–115,820.09)  | 109,337.19<br>(97,139.89–122,876.08) | 97,813.58<br>(86,519.28–109,609.90) | 73,763.49<br>(65,625.15–83,067.54)  | 58,936.60<br>(48,442.36–73,003.17)  |
| Malawi      | Group I    | 64,812.12<br>(60,233.58–70,099.75)  | 71,920.27<br>(65,078.39–80,067.68)    | 78,063.39<br>(70,372.47–87,269.15)   | 68,958.05<br>(62,184.83–76,185.20)  | 47,125.29<br>(43,123.56–51,635.79)  | 32,904.16<br>(28,357.56–38,350.90)  |
| Malawi      | NCD        | 24,775.40<br>(20,717.79–29,273.87)  | 25,414.28<br>(19,781.41–32,360.24)    | 26,529.68<br>(20,310.90–33,914.18)   | 24,789.16<br>(19,537.12–31,474.60)  | 22,967.93<br>(18,409.37–28,149.08)  | 22,426.90<br>(16,579.89–30,020.19)  |
| Malawi      | Injuries   | 5,116.08<br>(3,968.01–6,339.79)     | 4,829.27<br>(3,602.19–6,385.81)       | 4,744.12<br>(3,563.18–6,210.35)      | 4,066.37<br>(3,082.66–5,256.29)     | 3,670.26<br>(2,818.84–4,629.87)     | 3,605.55<br>(2,587.19–5,021.15)     |
| Mozambique  | All causes | 86,855.16<br>(80,871.26–93,722.84)  | 83,085.73<br>(76,727.92–89,843.64)    | 84,276.52<br>(76,764.15–92,370.24)   | 82,714.19<br>(72,817.13–93,744.27)  | 78,201.27<br>(65,855.33–91,554.56)  | 69,247.64<br>(54,693.47–87,939.03)  |
| Mozambique  | Group I    | 55,523.86<br>(51,959.58–59,769.74)  | 53,273.49<br>(49,737.61–57,578.54)    | 53,064.11<br>(49,083.95–57,964.87)   | 53,145.60<br>(47,607.61–59,271.25)  | 47,394.46<br>(41,876.56–53,447.82)  | 38,391.69<br>(32,457.25–45,477.94)  |
| Mozambique  | NCD        | 24,857.52<br>(21,573.98–28,636.21)  | 24,571.28<br>(21,006.29–28,136.05)    | 25,902.09<br>(21,526.15–30,224.66)   | 25,005.16<br>(19,868.94–30,884.30)  | 26,112.49<br>(19,597.01–33,536.22)  | 26,277.51<br>(18,216.51–36,059.08)  |
| Mozambique  | Injuries   | 6,473.78<br>(5,408.26–7,769.31)     | 5,240.96<br>(4,349.67–6,247.02)       | 5,310.33<br>(4,369.37–6,244.98)      | 4,563.43<br>(3,448.93–5,729.79)     | 4,694.32<br>(3,260.78–6,268.23)     | 4,578.44<br>(2,930.01–6,878.89)     |
| Rwanda      | All causes | 89,183.20<br>(80,876.73–98,353.86)  | 120,104.25<br>(110,028.09–129,896.14) | 94,605.55<br>(86,466.90–102,840.47)  | 62,265.62<br>(55,981.27–69,410.01)  | 48,613.01<br>(41,084.22–57,142.23)  | 46,205.20<br>(36,690.11–59,843.20)  |
| Rwanda      | Group I    | 46,595.04<br>(42,202.46–50,988.20)  | 62,742.14<br>(57,736.08–68,119.01)    | 54,478.54<br>(50,347.40–58,722.75)   | 34,167.67<br>(31,384.23–37,220.49)  | 21,962.52<br>(19,109.82–25,216.77)  | 18,844.80<br>(15,546.07–23,235.71)  |
| Rwanda      | NCD        | 32,873.21<br>(28,108.30–38,172.46)  | 41,311.20<br>(35,731.18–47,359.82)    | 31,054.43<br>(26,373.06–36,075.06)   | 21,904.22<br>(18,379.48–25,878.49)  | 21,247.41<br>(17,202.93–26,007.84)  | 22,120.29<br>(16,819.45–29,875.15)  |
| Rwanda      | Injuries   | 9,714.95<br>(7,578.00–12,314.16)    | 16,050.90<br>(11,697.87–20,496.20)    | 9,072.58<br>(7,315.70–11,203.58)     | 6,193.73<br>(4,891.17–7,819.39)     | 5,403.07<br>(4,089.19–7,100.07)     | 5,240.12<br>(3,789.40–7,449.60)     |
| Somalia     | All causes | 95,904.20<br>(63,680.88–149,897.47) | 92,389.61<br>(58,862.10–144,893.74)   | 90,141.71<br>(56,283.71–143,429.73)  | 85,866.73<br>(51,808.72–144,815.17) | 87,384.04<br>(54,249.16–150,015.19) | 79,062.30<br>(48,427.78–138,904.86) |
| Somalia     | Group I    | 54,507.20<br>(39,432.45–79,428.94)  | 53,696.45<br>(37,606.06–79,520.12)    | 52,676.09<br>(35,883.90–79,279.27)   | 49,563.43<br>(32,641.24–79,473.88)  | 48,870.68<br>(31,967.98–79,545.25)  | 41,254.48<br>(26,681.23–70,696.23)  |
| Somalia     | NCD        | 31,565.31<br>(16,885.66–54,553.34)  | 30,968.94<br>(16,218.36–52,403.35)    | 30,074.23<br>(15,707.44–51,140.58)   | 29,195.79<br>(15,224.54–51,646.54)  | 29,867.66<br>(15,882.24–55,832.87)  | 29,396.77<br>(15,729.93–54,072.25)  |
| Somalia     | Injuries   | 9,831.69<br>(6,089.53–15,904.15)    | 7,724.21<br>(4,388.75–13,318.23)      | 7,391.40<br>(3,868.42–13,509.21)     | 7,107.51<br>(3,765.38–13,521.92)    | 8,645.70<br>(5,237.56–15,650.91)    | 8,411.05<br>(5,092.27–14,772.10)    |
| South Sudan | All causes | 89,514.14<br>(63,744.07–135,733.81) | 83,961.85<br>(57,463.74–134,779.57)   | 78,724.02<br>(52,410.36–132,479.57)  | 75,884.87<br>(49,224.72–133,164.81) | 73,432.05<br>(48,009.29–135,731.63) | 72,823.16<br>(47,105.50–130,088.09) |
| South Sudan | Group I    | 54,718.36<br>(42,633.54–75,831.28)  | 50,631.39<br>(38,112.12–75,135.34)    | 47,732.51<br>(34,377.52–74,016.75)   | 45,550.04<br>(31,690.38–73,906.47)  | 42,268.53<br>(29,417.29–72,333.96)  | 39,223.00<br>(26,570.31–66,186.00)  |
| South Sudan | NCD        | 28,074.18<br>(16,185.19–48,953.76)  | 27,378.20<br>(15,521.80–49,090.35)    | 25,626.01<br>(14,721.33–47,156.45)   | 25,166.95<br>(14,335.78–47,837.13)  | 25,716.60<br>(14,699.80–52,319.35)  | 26,306.21<br>(15,011.02–51,563.23)  |
| South Sudan | Injuries   | 6,721.59<br>(3,916.12–11,387.22)    | 5,952.26<br>(3,152.69–11,060.08)      | 5,365.49<br>(2,826.51–10,659.58)     | 5,167.87<br>(2,657.36–11,051.45)    | 5,446.92<br>(2,817.11–12,391.27)    | 7,293.94<br>(4,393.54–13,875.89)    |
| Tanzania    | All causes | 74,635.69<br>(68,453.84–80,883.80)  | 78,662.01<br>(71,466.76–85,705.50)    | 77,312.98<br>(69,091.79–85,568.61)   | 68,940.51<br>(60,856.21–77,944.25)  | 57,332.06<br>(47,248.62–69,725.04)  | 50,165.28<br>(38,930.40–66,871.37)  |
| Tanzania    | Group I    | 44,808.27<br>(41,845.01–47,970.01)  | 49,552.48<br>(45,891.37–53,825.30)    | 49,959.40<br>(45,715.35–54,755.95)   | 43,167.12<br>(38,940.96–47,609.88)  | 31,643.76<br>(27,383.17–36,467.93)  | 23,575.09<br>(19,192.03–29,391.17)  |
| Tanzania    | NCD        | 25,054.45<br>(21,576.90–28,700.61)  | 24,821.96<br>(20,805.54–28,793.89)    | 23,582.84<br>(19,417.91–28,053.20)   | 22,224.89<br>(18,092.08–27,164.92)  | 22,129.60<br>(16,674.07–28,919.63)  | 22,970.24<br>(16,770.27–32,669.92)  |
| Tanzania    | Injuries   | 4,772.98<br>(3,964.93–5,599.04)     | 4,287.57<br>(3,488.08–5,165.44)       | 3,770.74<br>(3,011.04–4,568.02)      | 3,548.50<br>(2,811.07–4,484.37)     | 3,558.70<br>(2,636.70–5,017.68)     | 3,619.96<br>(2,530.49–5,498.78)     |
| Uganda      | All causes | 89,484.92<br>(80,168.07–98,827.73)  | 98,303.88<br>(87,653.51–108,977.74)   | 95,751.70<br>(85,990.18–104,297.08)  | 80,269.82<br>(71,857.60–89,413.57)  | 66,659.71<br>(56,289.25–77,660.63)  | 56,970.88<br>(43,861.26–72,711.13)  |
| Uganda      | Group I    | 55,992.24<br>(51,141.73–62,122.31)  | 63,749.52<br>(57,337.78–70,472.60)    | 60,087.34<br>(55,562.03–64,564.11)   | 45,895.41<br>(42,518.85–49,822.94)  | 34,887.71<br>(31,006.06–38,985.48)  | 25,599.83<br>(21,266.69–30,528.30)  |
| Uganda      | NCD        | 27,877.55<br>(22,137.64–32,686.86)  | 28,875.05<br>(22,395.91–34,731.75)    | 29,590.53<br>(23,469.14–34,878.95)   | 28,719.41<br>(23,693.52–34,007.77)  | 26,592.54<br>(20,461.59–33,087.01)  | 26,451.90<br>(18,626.18–35,737.44)  |



**Appendix Table 4. Rate of DALYs per 100,000 individuals for all causes and level 1 cause groups by location for 1990 - 2015, both sexes combined.**

|                                  | Cause      | 1990                                | 1995                                 | 2000                                  | 2005                                 | 2010                                 | 2015                                |
|----------------------------------|------------|-------------------------------------|--------------------------------------|---------------------------------------|--------------------------------------|--------------------------------------|-------------------------------------|
| Uganda                           | Injuries   | 5,615.14<br>(4,436.06–6,821.27)     | 5,679.31<br>(4,378.51–7,065.73)      | 6,073.83<br>(4,832.99–7,306.13)       | 5,654.99<br>(4,673.27–6,851.32)      | 5,179.45<br>(3,789.12–6,608.16)      | 4,919.15<br>(3,248.47–7,328.64)     |
| Zambia                           | All causes | 84,098.98<br>(76,204.37–91,970.11)  | 103,319.92<br>(93,447.20–114,101.89) | 113,576.22<br>(102,749.26–125,174.02) | 105,396.14<br>(95,985.98–115,732.42) | 81,958.84<br>(71,717.13–93,358.42)   | 69,974.43<br>(56,070.46–87,435.56)  |
| Zambia                           | Group I    | 52,862.09<br>(48,515.75–58,403.06)  | 67,788.77<br>(61,176.05–76,143.83)   | 76,089.23<br>(68,453.68–84,375.91)    | 66,288.83<br>(60,614.85–72,700.63)   | 44,260.38<br>(39,498.37–49,317.25)   | 34,153.55<br>(28,897.80–40,270.00)  |
| Zambia                           | NCD        | 26,032.95<br>(21,739.42–29,941.12)  | 29,885.55<br>(24,935.97–35,008.77)   | 31,662.88<br>(26,839.69–36,556.71)    | 33,000.29<br>(28,476.15–38,069.35)   | 31,820.88<br>(26,648.17–37,853.04)   | 30,374.75<br>(22,825.72–40,036.92)  |
| Zambia                           | Injuries   | 5,203.94<br>(4,104.53–6,209.63)     | 5,645.59<br>(4,449.03–6,793.65)      | 5,824.12<br>(4,677.88–7,015.23)       | 6,107.01<br>(5,013.59–7,357.57)      | 5,877.58<br>(4,721.90–7,344.22)      | 5,446.13<br>(3,563.97–7,625.10)     |
| Central Sub-Saharan Africa       | All causes | 85,050.74<br>(73,693.53–98,731.55)  | 84,920.90<br>(75,000.42–98,256.78)   | 83,692.17<br>(74,433.58–95,764.80)    | 76,663.20<br>(67,634.81–88,826.36)   | 69,795.21<br>(60,448.64–82,789.48)   | 63,600.40<br>(52,915.13–77,566.35)  |
| Central Sub-Saharan Africa       | Group I    | 49,419.75<br>(43,554.80–56,729.95)  | 50,862.31<br>(45,206.59–58,232.43)   | 49,880.55<br>(44,577.45–57,673.73)    | 44,652.35<br>(39,777.76–51,976.87)   | 37,801.67<br>(33,007.32–45,243.54)   | 31,212.05<br>(26,173.17–38,843.27)  |
| Central Sub-Saharan Africa       | NCD        | 29,106.01<br>(23,329.87–36,111.73)  | 28,255.85<br>(23,184.93–34,464.63)   | 27,889.53<br>(22,984.58–34,501.24)    | 26,989.22<br>(22,054.60–33,640.01)   | 27,116.05<br>(22,174.08–33,516.19)   | 27,585.71<br>(21,645.12–35,206.42)  |
| Central Sub-Saharan Africa       | Injuries   | 6,524.98<br>(4,720.90–8,576.98)     | 5,802.73<br>(4,200.64–7,669.60)      | 5,922.08<br>(4,464.80–7,534.63)       | 5,021.63<br>(3,808.20–6,495.11)      | 4,877.49<br>(3,682.30–6,631.56)      | 4,802.65<br>(3,554.49–6,546.88)     |
| Angola                           | All causes | 98,226.86<br>(64,387.60–149,590.50) | 90,303.73<br>(58,875.12–147,432.57)  | 85,680.81<br>(56,783.32–135,546.03)   | 76,468.52<br>(50,012.15–129,212.31)  | 69,136.38<br>(44,707.68–124,916.99)  | 63,211.73<br>(40,011.34–119,150.29) |
| Angola                           | Group I    | 51,577.09<br>(36,857.81–73,167.97)  | 47,501.43<br>(33,658.54–72,193.96)   | 45,049.38<br>(32,620.41–66,018.22)    | 38,375.82<br>(27,229.71–59,116.78)   | 31,138.88<br>(21,566.98–49,925.95)   | 26,157.22<br>(17,747.38–44,543.86)  |
| Angola                           | NCD        | 35,729.73<br>(18,591.15–59,315.47)  | 34,271.51<br>(18,065.50–60,202.83)   | 32,624.24<br>(17,773.24–55,893.87)    | 31,526.38<br>(17,382.73–57,815.94)   | 31,437.75<br>(17,922.98–61,154.62)   | 31,063.68<br>(17,817.99–62,950.90)  |
| Angola                           | Injuries   | 10,920.05<br>(6,029.28–17,928.26)   | 8,530.78<br>(4,409.49–15,370.75)     | 8,007.18<br>(4,195.61–14,133.15)      | 6,566.32<br>(3,463.96–12,909.12)     | 6,559.75<br>(3,626.41–13,852.23)     | 5,990.83<br>(3,277.78–13,500.28)    |
| Central African Republic         | All causes | 99,861.09<br>(90,325.21–109,727.53) | 106,723.07<br>(87,445.73–124,384.02) | 112,871.23<br>(87,009.25–142,068.68)  | 112,253.84<br>(83,490.59–145,907.34) | 102,184.07<br>(75,351.63–134,456.55) | 95,671.88<br>(68,566.30–128,617.43) |
| Central African Republic         | Group I    | 56,964.85<br>(51,351.21–62,907.58)  | 63,647.16<br>(54,713.27–73,738.59)   | 69,391.57<br>(56,629.20–84,127.13)    | 68,820.57<br>(54,984.12–84,790.96)   | 58,193.43<br>(46,206.77–73,475.10)   | 51,087.67<br>(38,907.62–63,217.17)  |
| Central African Republic         | NCD        | 34,999.54<br>(29,454.78–40,323.88)  | 35,506.00<br>(26,603.45–44,247.95)   | 35,823.85<br>(23,914.29–48,447.01)    | 35,904.70<br>(23,086.28–50,229.19)   | 36,194.49<br>(23,389.07–51,108.79)   | 36,487.74<br>(23,282.71–51,574.26)  |
| Central African Republic         | Injuries   | 7,896.70<br>(5,693.75–9,999.26)     | 7,569.91<br>(4,745.79–10,526.52)     | 7,655.81<br>(4,281.50–11,994.97)      | 7,528.58<br>(4,109.48–12,145.51)     | 7,796.14<br>(4,221.23–12,509.54)     | 8,096.47<br>(4,519.45–13,123.41)    |
| Congo                            | All causes | 80,293.48<br>(68,984.31–92,238.66)  | 85,733.28<br>(75,446.34–95,826.29)   | 85,465.91<br>(76,142.95–95,230.00)    | 71,575.15<br>(62,956.79–81,288.53)   | 60,891.32<br>(51,562.24–72,935.57)   | 58,141.07<br>(44,611.78–75,755.32)  |
| Congo                            | Group I    | 38,198.07<br>(33,141.10–44,107.38)  | 43,269.46<br>(38,065.33–48,523.53)   | 44,769.33<br>(40,107.26–49,749.47)    | 37,327.62<br>(33,503.26–42,104.16)   | 27,623.81<br>(24,026.64–32,464.90)   | 25,163.79<br>(20,021.37–31,608.47)  |
| Congo                            | NCD        | 35,924.20<br>(29,465.11–42,712.40)  | 36,417.61<br>(30,588.69–42,109.57)   | 34,022.68<br>(28,303.72–40,098.07)    | 29,677.60<br>(24,680.60–35,033.11)   | 29,011.77<br>(23,164.85–35,721.72)   | 28,982.63<br>(20,741.29–39,341.29)  |
| Congo                            | Injuries   | 6,171.20<br>(4,540.31–7,955.40)     | 6,046.21<br>(4,448.75–7,577.21)      | 6,673.90<br>(4,966.01–8,275.82)       | 4,569.93<br>(3,541.51–5,794.19)      | 4,255.75<br>(3,272.95–5,604.09)      | 3,994.65<br>(2,771.96–5,887.33)     |
| Democratic Republic of the Congo | All causes | 80,048.08<br>(67,893.46–93,742.21)  | 81,586.90<br>(72,959.49–91,593.28)   | 80,847.99<br>(73,001.53–90,376.39)    | 74,667.01<br>(67,184.50–84,095.00)   | 68,671.18<br>(60,261.82–79,868.13)   | 62,333.05<br>(50,613.11–76,320.48)  |
| Democratic Republic of the Congo | Group I    | 49,239.80<br>(42,565.63–58,088.36)  | 51,782.79<br>(46,040.11–59,934.01)   | 50,570.93<br>(45,117.71–59,392.46)    | 45,700.88<br>(40,713.95–54,289.12)   | 39,515.44<br>(34,496.40–47,946.86)   | 32,232.14<br>(26,102.05–41,287.62)  |
| Democratic Republic of the Congo | NCD        | 25,809.69<br>(20,152.15–32,357.55)  | 25,056.67<br>(20,650.64–29,458.96)   | 25,209.15<br>(21,007.97–29,315.99)    | 24,618.14<br>(20,373.46–29,145.37)   | 24,994.19<br>(20,209.43–29,829.72)   | 25,848.06<br>(19,603.05–32,539.44)  |
| Democratic Republic of the Congo | Injuries   | 4,998.59<br>(3,402.58–6,679.70)     | 4,747.44<br>(3,562.47–6,035.23)      | 5,067.91<br>(3,956.85–6,285.94)       | 4,347.99<br>(3,427.47–5,368.68)      | 4,161.55<br>(3,253.85–5,284.96)      | 4,252.85<br>(3,026.64–5,748.04)     |
| Equatorial Guinea                | All causes | 97,040.12<br>(59,329.72–152,339.63) | 97,325.91<br>(61,539.67–152,597.03)  | 81,941.65<br>(54,647.99–130,528.04)   | 72,563.54<br>(50,588.84–121,500.56)  | 65,465.22<br>(45,788.87–111,795.09)  | 58,721.35<br>(40,625.64–107,207.42) |
| Equatorial Guinea                | Group I    | 49,639.88<br>(34,596.19–72,939.32)  | 51,892.92<br>(36,881.11–75,169.02)   | 42,445.45<br>(31,227.47–60,098.01)    | 36,841.68<br>(26,825.19–54,546.18)   | 31,099.19<br>(22,166.56–46,230.95)   | 26,218.89<br>(18,534.54–41,277.60)  |

**Appendix Table 4. Rate of DALYs per 100,000 individuals for all causes and level 1 cause groups by location for 1990 - 2015, both sexes combined.**

|                   | Cause      | 1990                               | 1995                               | 2000                               | 2005                               | 2010                               | 2015                               |
|-------------------|------------|------------------------------------|------------------------------------|------------------------------------|------------------------------------|------------------------------------|------------------------------------|
| Equatorial Guinea | NCD        | 38,775.97<br>(19,879.80–64,739.53) | 37,360.99<br>(19,116.95–63,397.47) | 32,535.25<br>(17,994.62–58,836.51) | 28,856.84<br>(17,738.34–54,730.34) | 28,315.30<br>(18,401.82–54,518.45) | 27,352.81<br>(18,070.05–53,991.25) |
| Equatorial Guinea | Injuries   | 8,624.27<br>(4,014.38–16,144.73)   | 8,072.00<br>(3,764.17–15,380.79)   | 6,960.95<br>(3,173.33–13,659.95)   | 6,865.01<br>(3,818.63–13,675.94)   | 6,050.73<br>(3,240.81–12,515.60)   | 5,149.66<br>(2,923.59–11,413.87)   |
| Gabon             | All causes | 63,967.90<br>(57,041.31–71,243.64) | 63,028.80<br>(56,201.33–71,079.33) | 64,367.78<br>(57,623.24–72,426.43) | 62,235.63<br>(54,943.18–70,732.89) | 55,187.89<br>(47,240.92–64,298.40) | 48,461.65<br>(38,952.54–62,066.84) |
| Gabon             | Group I    | 27,407.18<br>(24,564.33–30,564.33) | 27,177.71<br>(24,365.34–30,629.44) | 30,413.37<br>(26,988.73–34,186.94) | 29,390.25<br>(25,908.95–33,400.93) | 25,372.30<br>(21,986.63–29,705.96) | 19,137.55<br>(15,604.41–24,451.15) |
| Gabon             | NCD        | 30,425.36<br>(26,062.55–34,894.34) | 30,117.84<br>(25,594.77–34,735.18) | 29,114.93<br>(24,856.17–34,154.77) | 28,325.14<br>(24,056.79–33,741.26) | 25,737.43<br>(20,922.96–31,456.99) | 25,374.49<br>(19,517.44–33,986.07) |
| Gabon             | Injuries   | 6,135.36<br>(4,816.34–7,426.93)    | 5,733.26<br>(4,563.71–7,075.78)    | 4,839.48<br>(3,745.80–6,097.24)    | 4,520.23<br>(3,433.47–5,907.55)    | 4,078.17<br>(3,045.29–5,399.89)    | 3,949.61<br>(2,766.26–5,982.71)    |

Appendix Table 5. Socio-Demographic Index values for all estimated GBD 2015 locations, 1980-2015

| Location                                         | 1980   | 1981   | 1982   | 1983   | 1984   | 1985   | 1986   | 1987   | 1988   | 1989   | 1990   | 1991   | 1992   | 1993   | 1994   | 1995   | 1996   | 1997   | 1998   | 1999   | 2000   | 2001   | 2002   | 2003   | 2004   | 2005   | 2006   | 2007   | 2008   | 2009   | 2010   | 2011   | 2012   | 2013   | 2014   | 2015   |        |        |
|--------------------------------------------------|--------|--------|--------|--------|--------|--------|--------|--------|--------|--------|--------|--------|--------|--------|--------|--------|--------|--------|--------|--------|--------|--------|--------|--------|--------|--------|--------|--------|--------|--------|--------|--------|--------|--------|--------|--------|--------|--------|
| Global                                           | 0.4199 | 0.4256 | 0.4311 | 0.4365 | 0.4424 | 0.4489 | 0.4551 | 0.4615 | 0.4681 | 0.4745 | 0.4811 | 0.4877 | 0.4944 | 0.5011 | 0.5078 | 0.5146 | 0.5214 | 0.5279 | 0.5349 | 0.5398 | 0.5456 | 0.5512 | 0.5568 | 0.5625 | 0.5685 | 0.5748 | 0.5815 | 0.5886 | 0.5953 | 0.6015 | 0.6079 | 0.6143 | 0.6204 | 0.6265 | 0.6324 | 0.6381 |        |        |
| Southeast Asia, East Asia, and Oceania           | 0.3345 | 0.3444 | 0.3544 | 0.3636 | 0.3744 | 0.3865 | 0.3973 | 0.4081 | 0.4187 | 0.4284 | 0.4380 | 0.4483 | 0.4596 | 0.4705 | 0.4836 | 0.4957 | 0.5074 | 0.5185 | 0.5281 | 0.5370 | 0.5454 | 0.5535 | 0.5618 | 0.5698 | 0.5782 | 0.5869 | 0.5958 | 0.6052 | 0.6138 | 0.6219 | 0.6301 | 0.6380 | 0.6458 | 0.6533 | 0.6605 | 0.6672 |        |        |
| East Asia                                        | 0.3249 | 0.3346 | 0.3447 | 0.3538 | 0.3650 | 0.3783 | 0.3903 | 0.4019 | 0.4134 | 0.4237 | 0.4338 | 0.4449 | 0.4572 | 0.4705 | 0.4835 | 0.4957 | 0.5092 | 0.5211 | 0.5316 | 0.5410 | 0.5504 | 0.5592 | 0.5681 | 0.5768 | 0.5858 | 0.5950 | 0.6047 | 0.6149 | 0.6240 | 0.6327 | 0.6413 | 0.6496 | 0.6576 | 0.6653 | 0.6725 | 0.6792 |        |        |
| China                                            | 0.3160 | 0.3258 | 0.3361 | 0.3452 | 0.3565 | 0.3700 | 0.3819 | 0.3939 | 0.4057 | 0.4161 | 0.4265 | 0.4377 | 0.4502 | 0.4636 | 0.4773 | 0.4909 | 0.5038 | 0.5161 | 0.5268 | 0.5368 | 0.5468 | 0.5563 | 0.5654 | 0.5743 | 0.5826 | 0.5912 | 0.6001 | 0.6094 | 0.6184 | 0.6262 | 0.6349 | 0.6433 | 0.6517 | 0.6597 | 0.6674 | 0.6750 | 0.6810 |        |
| Anhui                                            | 0.2700 | 0.2948 | 0.3045 | 0.3140 | 0.3259 | 0.3402 | 0.3532 | 0.3665 | 0.3721 | 0.3790 | 0.3881 | 0.3984 | 0.4118 | 0.4258 | 0.4382 | 0.4502 | 0.4615 | 0.4709 | 0.4798 | 0.4888 | 0.4985 | 0.5075 | 0.5177 | 0.5270 | 0.5358 | 0.5451 | 0.5549 | 0.5647 | 0.5742 | 0.5834 | 0.5927 | 0.6016 | 0.6101 | 0.6187 | 0.6270 | 0.6351 | 0.6430 | 0.6507 |
| Beijing                                          | 0.5196 | 0.5177 | 0.5154 | 0.5131 | 0.5108 | 0.5084 | 0.5059 | 0.5033 | 0.5007 | 0.4981 | 0.4954 | 0.4927 | 0.4900 | 0.4873 | 0.4846 | 0.4819 | 0.4792 | 0.4765 | 0.4738 | 0.4711 | 0.4684 | 0.4657 | 0.4630 | 0.4603 | 0.4576 | 0.4549 | 0.4522 | 0.4495 | 0.4468 | 0.4441 | 0.4414 | 0.4387 | 0.4360 | 0.4333 | 0.4306 | 0.4279 | 0.4252 | 0.4225 |
| Changsha                                         | 0.2719 | 0.2896 | 0.3005 | 0.2971 | 0.2987 | 0.3063 | 0.3173 | 0.3453 | 0.3715 | 0.3864 | 0.4016 | 0.4080 | 0.4194 | 0.4338 | 0.4490 | 0.4630 | 0.4773 | 0.4894 | 0.5020 | 0.5151 | 0.5288 | 0.5430 | 0.5580 | 0.5740 | 0.5910 | 0.6080 | 0.6250 | 0.6420 | 0.6590 | 0.6760 | 0.6930 | 0.7100 | 0.7270 | 0.7440 | 0.7610 | 0.7780 | 0.7950 |        |
| Fujian                                           | 0.2079 | 0.2122 | 0.2118 | 0.2118 | 0.2112 | 0.2112 | 0.2112 | 0.2112 | 0.2112 | 0.2112 | 0.2112 | 0.2112 | 0.2112 | 0.2112 | 0.2112 | 0.2112 | 0.2112 | 0.2112 | 0.2112 | 0.2112 | 0.2112 | 0.2112 | 0.2112 | 0.2112 | 0.2112 | 0.2112 | 0.2112 | 0.2112 | 0.2112 | 0.2112 | 0.2112 | 0.2112 | 0.2112 | 0.2112 | 0.2112 | 0.2112 | 0.2112 |        |
| Guangdong                                        | 0.2644 | 0.2774 | 0.2982 | 0.2651 | 0.3270 | 0.3380 | 0.3390 | 0.3420 | 0.3430 | 0.3440 | 0.3450 | 0.3460 | 0.3470 | 0.3480 | 0.3490 | 0.3500 | 0.3510 | 0.3520 | 0.3530 | 0.3540 | 0.3550 | 0.3560 | 0.3570 | 0.3580 | 0.3590 | 0.3600 | 0.3610 | 0.3620 | 0.3630 | 0.3640 | 0.3650 | 0.3660 | 0.3670 | 0.3680 | 0.3690 | 0.3700 | 0.3710 | 0.3720 |
| Guangxi                                          | 0.2408 | 0.2522 | 0.2642 | 0.2819 | 0.2830 | 0.2995 | 0.3177 | 0.3364 | 0.3511 | 0.3688 | 0.3816 | 0.3923 | 0.3958 | 0.4095 | 0.4244 | 0.4398 | 0.4541 | 0.4663 | 0.4763 | 0.4870 | 0.4960 | 0.5046 | 0.5142 | 0.5211 | 0.5327 | 0.5416 | 0.5503 | 0.5615 | 0.5702 | 0.5798 | 0.5917 | 0.6017 | 0.6098 | 0.6191 | 0.6285 | 0.6389 | 0.6495 | 0.6601 |
| Guizhou                                          | 0.1444 | 0.1827 | 0.1954 | 0.2076 | 0.2265 | 0.2523 | 0.2667 | 0.2909 | 0.3098 | 0.3275 | 0.3452 | 0.3629 | 0.3806 | 0.3983 | 0.4160 | 0.4337 | 0.4514 | 0.4691 | 0.4868 | 0.5045 | 0.5222 | 0.5400 | 0.5578 | 0.5756 | 0.5934 | 0.6112 | 0.6290 | 0.6468 | 0.6646 | 0.6824 | 0.7002 | 0.7180 | 0.7358 | 0.7536 | 0.7714 | 0.7892 | 0.8070 |        |
| Hainan                                           | 0.3372 | 0.3483 | 0.3562 | 0.3515 | 0.3557 | 0.3606 | 0.3639 | 0.3689 | 0.3732 | 0.3775 | 0.3818 | 0.3861 | 0.3904 | 0.3947 | 0.3990 | 0.4033 | 0.4076 | 0.4119 | 0.4162 | 0.4205 | 0.4248 | 0.4291 | 0.4334 | 0.4377 | 0.4420 | 0.4463 | 0.4506 | 0.4549 | 0.4592 | 0.4635 | 0.4678 | 0.4721 | 0.4764 | 0.4807 | 0.4850 | 0.4893 | 0.4936 | 0.4979 |
| Hebei                                            | 0.3012 | 0.3000 | 0.3102 | 0.3194 | 0.3271 | 0.3358 | 0.3373 | 0.3391 | 0.3550 | 0.3712 | 0.3842 | 0.4054 | 0.4212 | 0.4335 | 0.4505 | 0.4678 | 0.4816 | 0.4948 | 0.5050 | 0.5128 | 0.5236 | 0.5346 | 0.5460 | 0.5481 | 0.5540 | 0.5568 | 0.5649 | 0.5715 | 0.5827 | 0.5923 | 0.5971 | 0.6056 | 0.6192 | 0.6289 | 0.6388 | 0.6485 | 0.6583 | 0.6681 |
| Hubei                                            | 0.4107 | 0.4211 | 0.4243 | 0.4322 | 0.4416 | 0.4501 | 0.4553 | 0.4604 | 0.4713 | 0.4766 | 0.4880 | 0.4964 | 0.5026 | 0.5125 | 0.5239 | 0.5360 | 0.5479 | 0.5567 | 0.5652 | 0.5746 | 0.5823 | 0.5898 | 0.5974 | 0.6046 | 0.6116 | 0.6186 | 0.6261 | 0.6340 | 0.6412 | 0.6486 | 0.6557 | 0.6627 | 0.6693 | 0.6756 | 0.6816 | 0.6870 |        |        |
| Hunan                                            | 0.2599 | 0.2737 | 0.2863 | 0.3021 | 0.3261 | 0.3410 | 0.3521 | 0.3619 | 0.3732 | 0.3886 | 0.3967 | 0.4066 | 0.4202 | 0.4378 | 0.4525 | 0.4705 | 0.4856 | 0.4989 | 0.5268 | 0.5426 | 0.5618 | 0.5808 | 0.5974 | 0.6146 | 0.6306 | 0.6476 | 0.6646 | 0.6816 | 0.6986 | 0.7156 | 0.7326 | 0.7496 | 0.7666 | 0.7836 | 0.8006 | 0.8176 | 0.8346 |        |
| Hong Kong Special Administrative Region of China | 0.6812 | 0.6920 | 0.7014 | 0.7095 | 0.7179 | 0.7255 | 0.7341 | 0.7422 | 0.7521 | 0.7599 | 0.7699 | 0.7746 | 0.7823 | 0.7901 | 0.7980 | 0.8055 | 0.8115 | 0.8161 | 0.8194 | 0.8224 | 0.8257 | 0.8294 | 0.8329 | 0.8364 | 0.8404 | 0.8449 | 0.8495 | 0.8545 | 0.8589 | 0.8622 | 0.8654 | 0.8680 | 0.8702 | 0.8723 | 0.8743 | 0.8762 | 0.8780 |        |
| Hubei                                            | 0.3301 | 0.3433 | 0.3583 | 0.3660 | 0.3777 | 0.3887 | 0.3979 | 0.4074 | 0.4212 | 0.4283 | 0.4388 | 0.4515 | 0.4788 | 0.4668 | 0.4888 | 0.5107 | 0.5228 | 0.5367 | 0.5583 | 0.5668 | 0.5752 | 0.5840 | 0.5929 | 0.6019 | 0.6099 | 0.6185 | 0.6275 | 0.6346 | 0.6394 | 0.6459 | 0.6519 | 0.6592 | 0.6662 | 0.6730 | 0.6800 | 0.6870 | 0.6940 |        |
| Hong Kong                                        | 0.3095 | 0.3186 | 0.3209 | 0.3331 | 0.3484 | 0.3595 | 0.3692 | 0.3792 | 0.3883 | 0.4020 | 0.4120 | 0.4233 | 0.4440 | 0.4574 | 0.4695 | 0.4825 | 0.4944 | 0.5045 | 0.5142 | 0.5235 | 0.5308 | 0.5375 | 0.5456 | 0.5525 | 0.5611 | 0.5718 | 0.5806 | 0.5903 | 0.5970 | 0.6040 | 0.6108 | 0.6179 | 0.6251 | 0.6340 | 0.6426 | 0.6510 |        |        |
| Inner Mongolia                                   | 0.3320 | 0.3421 | 0.3502 | 0.3683 | 0.3788 | 0.3954 | 0.4090 | 0.4226 | 0.4305 | 0.4430 | 0.4500 | 0.4648 | 0.4738 | 0.4834 | 0.4960 | 0.5122 | 0.5276 | 0.5410 | 0.5537 | 0.5695 | 0.5874 | 0.6065 | 0.6266 | 0.6477 | 0.6688 | 0.6900 | 0.7112 | 0.7324 | 0.7536 | 0.7748 | 0.7960 | 0.8172 | 0.8384 | 0.8596 | 0.8808 | 0.9020 |        |        |
| Jiangsu                                          | 0.3724 | 0.3806 | 0.3916 | 0.4044 | 0.4194 | 0.4297 | 0.4429 | 0.4563 | 0.4640 | 0.4652 | 0.4762 | 0.4889 | 0.5012 | 0.5168 | 0.5296 | 0.5446 | 0.5599 | 0.5683 | 0.5787 | 0.5881 | 0.5974 | 0.6069 | 0.6157 | 0.6252 | 0.6342 | 0.6447 | 0.6545 | 0.6645 | 0.6746 | 0.6844 | 0.6945 | 0.7047 | 0.7149 | 0.7251 | 0.7353 | 0.7455 |        |        |
| Jiangxi                                          | 0.3010 | 0.3107 | 0.3223 | 0.3338 | 0.3454 | 0.3584 | 0.3821 | 0.3922 | 0.3962 | 0.4066 | 0.4160 | 0.4297 | 0.4382 | 0.4529 | 0.4625 | 0.4801 | 0.4968 | 0.5097 | 0.5096 | 0.5184 | 0.5285 | 0.5353 | 0.5443 | 0.5519 | 0.5615 | 0.5698 | 0.5790 | 0.5874 | 0.5966 | 0.6058 | 0.6149 | 0.6240 | 0.6331 | 0.6422 | 0.6513 | 0.6604 |        |        |
| Liaoning                                         | 0.4291 | 0.4406 | 0.4443 | 0.4539 | 0.4686 | 0.4730 | 0.4822 | 0.4919 | 0.5016 | 0.5128 | 0.5194 | 0.5332 | 0.5398 | 0.5498 | 0.5644 | 0.5804 | 0.5986 | 0.5987 | 0.6083 | 0.6172 | 0.6255 | 0.6340 | 0.6423 | 0.6507 | 0.6591 | 0.6675 | 0.6760 | 0.6844 | 0.6928 | 0.7012 | 0.7096 | 0.7180 | 0.7264 | 0.7348 | 0.7432 | 0.7516 | 0.7600 |        |
| Macao Special Administrative Region of China     | 0.6646 | 0.6438 | 0.6407 | 0.6569 | 0.6640 | 0.6715 | 0.6798 | 0.6902 | 0.7014 | 0.7122 | 0.7224 | 0.7312 | 0.7412 | 0.7505 | 0.7597 | 0.7688 | 0.7758 | 0.7827 | 0.7888 | 0.7943 | 0.7986 | 0.8027 | 0.8072 | 0.8129 | 0.8184 | 0.8241 | 0.8298 | 0.8354 | 0.8411 | 0.8468 | 0.8525 | 0.8582 | 0.8639 | 0.8696 | 0.8753 | 0.8810 | 0.8867 |        |
| Ningxia                                          | 0.3169 | 0.3372 | 0.3447 | 0.3577 | 0.3627 | 0.3754 | 0.3860 | 0.3976 | 0.4056 | 0.4217 | 0.4325 | 0.4415 | 0.4545 | 0.4647 | 0.4784 | 0.4900 | 0.5019 | 0.5111 | 0.5214 | 0.5296 | 0.5377 | 0.5449 | 0.5519 | 0.5610 | 0.5689 | 0.5782 | 0.5865 | 0.5979 | 0.6075 | 0.6184 | 0.6229 | 0.6310 | 0.6407 | 0.6482 | 0.6566 | 0.6640 |        |        |
| Qinghai                                          | 0.3085 | 0.3151 | 0.3245 | 0.3308 | 0.3377 | 0.3437 | 0.3505 | 0.3567 | 0.3638 | 0.3903 | 0.3903 | 0.3954 | 0.4055 | 0.4188 | 0.4253 | 0.4411 | 0.4436 | 0.4565 | 0.4683 | 0.4809 | 0.4911 | 0.5044 | 0.5184 | 0.5324 | 0.5464 | 0.5604 | 0.5744 | 0.5884 | 0.6024 | 0.6164 | 0.6304 | 0.6444 | 0.6584 | 0.6724 | 0.6864 | 0.7004 |        |        |
| Shaanxi                                          | 0.3076 | 0.3161 | 0.3242 | 0.3336 | 0.3413 | 0.3534 | 0.3679 | 0.3827 | 0.3923 | 0.4008 | 0.4093 | 0.4216 | 0.4327 | 0.4473 | 0.4601 | 0.4755 | 0.4897 | 0.5023 | 0.5129 | 0.5240 | 0.5343 | 0.5449 | 0.5541 | 0.5625 | 0.5724 | 0.5834 | 0.5927 | 0.6034 | 0.6131 | 0.6227 | 0.6339 | 0.6423 | 0.6508 | 0.6566 | 0.6604 | 0.6641 |        |        |
|                                                  |        |        |        |        |        |        |        |        |        |        |        |        |        |        |        |        |        |        |        |        |        |        |        |        |        |        |        |        |        |        |        |        |        |        |        |        |        |        |

Appendix Table 5. Socio-Demographic Index values for all estimated GBD 2015 locations, 1980-2015

| Location | 1980   | 1981   | 1982   | 1983   | 1984   | 1985   | 1986   | 1987   | 1988   | 1989   | 1990   | 1991   | 1992   | 1993   | 1994   | 1995   | 1996   | 1997   | 1998   | 1999   | 2000   | 2001   | 2002   | 2003   | 2004   | 2005   | 2006   | 2007   | 2008   | 2009   | 2010   | 2011   | 2012   | 2013   | 2014   | 2015   |        |        |        |        |        |        |        |        |        |        |        |        |        |        |        |        |        |        |        |        |        |        |        |        |        |        |        |        |        |        |        |        |        |        |        |        |        |        |        |        |        |        |        |        |        |        |        |        |        |        |        |        |        |        |        |        |        |        |        |        |        |        |        |        |        |        |        |        |        |        |        |        |        |        |        |        |        |        |        |        |        |        |        |        |        |        |        |        |        |        |        |        |        |        |        |        |        |        |        |        |        |        |        |        |        |        |        |        |        |        |        |        |        |        |        |        |        |        |        |        |        |        |        |        |        |        |        |        |        |        |        |        |        |        |        |        |        |        |        |        |        |        |        |        |        |        |        |        |        |        |        |        |        |        |        |        |        |        |        |        |        |        |        |        |        |        |        |        |        |        |        |        |        |        |        |        |        |        |        |        |        |        |        |        |        |        |        |        |        |        |        |        |        |        |        |        |        |        |        |        |        |        |        |        |        |        |        |        |        |        |        |        |        |        |        |        |        |        |        |        |        |        |        |        |        |        |        |        |        |        |        |        |        |        |        |        |        |        |        |        |        |        |        |        |        |        |        |        |        |        |        |        |        |        |        |        |        |        |        |        |        |        |        |        |        |        |        |        |        |        |        |        |        |        |        |        |        |        |        |        |        |        |        |        |        |        |        |        |        |        |        |        |        |        |        |        |        |        |        |        |        |        |        |        |        |        |        |        |        |        |        |        |        |        |        |        |        |        |        |        |        |        |        |        |        |        |        |        |        |        |        |        |        |        |        |        |        |        |        |        |        |        |        |        |        |        |        |        |        |        |        |        |        |        |        |        |        |        |        |        |        |        |        |        |        |        |        |        |        |        |        |        |        |        |        |        |        |        |        |        |        |        |        |        |        |        |        |        |        |        |        |        |        |        |        |        |        |        |        |        |        |        |        |        |        |        |        |        |        |        |        |        |        |        |        |        |        |        |        |        |        |        |        |        |        |        |        |        |        |        |        |        |        |        |        |        |        |        |        |        |        |        |        |        |        |        |        |        |        |        |        |        |        |        |        |        |        |        |        |        |        |        |        |        |        |        |        |        |        |        |        |        |        |        |        |        |        |        |        |        |        |        |        |        |        |        |        |        |        |        |        |        |        |        |        |        |        |        |        |        |        |        |        |        |        |        |        |        |        |        |        |        |        |        |        |        |        |        |        |        |        |        |        |        |        |        |        |        |        |        |        |        |        |        |        |        |        |        |        |        |        |        |        |        |        |        |        |        |        |        |        |        |        |        |        |        |        |        |        |        |        |        |        |        |        |        |        |        |        |        |        |        |        |        |        |        |        |        |        |        |        |        |        |        |        |        |        |        |        |        |        |        |        |        |        |        |        |        |        |        |        |        |        |        |        |        |        |        |        |        |        |        |        |        |        |        |        |        |        |        |        |        |        |        |        |        |        |        |        |        |        |        |        |        |        |        |        |        |        |        |        |        |        |        |        |        |        |        |        |        |        |        |        |        |        |        |        |        |        |        |        |        |        |        |        |        |        |        |        |        |        |        |        |        |        |        |        |        |        |        |        |        |        |        |        |        |        |        |        |        |        |        |        |        |        |        |        |        |        |        |        |        |        |        |        |        |        |        |        |        |        |        |        |        |        |        |        |        |        |        |        |        |        |        |        |        |        |        |        |        |        |        |        |        |        |        |        |        |        |        |        |        |        |        |        |        |        |        |        |        |        |        |        |        |        |        |        |        |        |        |        |        |        |        |        |        |        |        |        |        |        |        |        |        |        |        |        |        |        |        |        |        |        |        |        |        |        |        |        |        |        |        |        |        |        |        |        |        |        |        |        |        |        |        |        |        |        |        |        |        |        |        |        |        |        |        |        |        |        |        |        |        |        |        |        |        |        |        |        |        |        |        |        |        |        |        |        |        |        |        |        |        |        |        |        |        |        |        |        |        |        |        |        |        |        |        |        |        |        |        |        |        |        |        |        |        |        |        |        |        |        |        |        |        |        |        |        |        |        |        |        |        |        |        |        |        |        |        |        |        |        |        |        |        |        |        |        |        |        |        |        |        |        |        |        |        |        |        |        |        |        |        |        |        |        |        |        |        |        |        |        |        |        |        |        |        |        |        |        |        |        |        |        |        |        |        |        |        |        |        |        |        |        |        |        |        |        |        |        |        |        |        |        |        |        |        |        |        |        |        |        |        |        |        |        |        |        |        |        |        |        |        |        |        |        |        |        |        |        |        |        |        |        |        |        |        |        |        |        |        |        |        |        |        |        |        |        |        |        |        |        |        |        |        |        |        |        |        |        |        |        |        |        |        |        |        |        |        |        |        |        |        |        |        |        |        |        |        |        |        |        |        |        |        |        |        |        |        |        |        |        |        |        |        |     |
|----------|--------|--------|--------|--------|--------|--------|--------|--------|--------|--------|--------|--------|--------|--------|--------|--------|--------|--------|--------|--------|--------|--------|--------|--------|--------|--------|--------|--------|--------|--------|--------|--------|--------|--------|--------|--------|--------|--------|--------|--------|--------|--------|--------|--------|--------|--------|--------|--------|--------|--------|--------|--------|--------|--------|--------|--------|--------|--------|--------|--------|--------|--------|--------|--------|--------|--------|--------|--------|--------|--------|--------|--------|--------|--------|--------|--------|--------|--------|--------|--------|--------|--------|--------|--------|--------|--------|--------|--------|--------|--------|--------|--------|--------|--------|--------|--------|--------|--------|--------|--------|--------|--------|--------|--------|--------|--------|--------|--------|--------|--------|--------|--------|--------|--------|--------|--------|--------|--------|--------|--------|--------|--------|--------|--------|--------|--------|--------|--------|--------|--------|--------|--------|--------|--------|--------|--------|--------|--------|--------|--------|--------|--------|--------|--------|--------|--------|--------|--------|--------|--------|--------|--------|--------|--------|--------|--------|--------|--------|--------|--------|--------|--------|--------|--------|--------|--------|--------|--------|--------|--------|--------|--------|--------|--------|--------|--------|--------|--------|--------|--------|--------|--------|--------|--------|--------|--------|--------|--------|--------|--------|--------|--------|--------|--------|--------|--------|--------|--------|--------|--------|--------|--------|--------|--------|--------|--------|--------|--------|--------|--------|--------|--------|--------|--------|--------|--------|--------|--------|--------|--------|--------|--------|--------|--------|--------|--------|--------|--------|--------|--------|--------|--------|--------|--------|--------|--------|--------|--------|--------|--------|--------|--------|--------|--------|--------|--------|--------|--------|--------|--------|--------|--------|--------|--------|--------|--------|--------|--------|--------|--------|--------|--------|--------|--------|--------|--------|--------|--------|--------|--------|--------|--------|--------|--------|--------|--------|--------|--------|--------|--------|--------|--------|--------|--------|--------|--------|--------|--------|--------|--------|--------|--------|--------|--------|--------|--------|--------|--------|--------|--------|--------|--------|--------|--------|--------|--------|--------|--------|--------|--------|--------|--------|--------|--------|--------|--------|--------|--------|--------|--------|--------|--------|--------|--------|--------|--------|--------|--------|--------|--------|--------|--------|--------|--------|--------|--------|--------|--------|--------|--------|--------|--------|--------|--------|--------|--------|--------|--------|--------|--------|--------|--------|--------|--------|--------|--------|--------|--------|--------|--------|--------|--------|--------|--------|--------|--------|--------|--------|--------|--------|--------|--------|--------|--------|--------|--------|--------|--------|--------|--------|--------|--------|--------|--------|--------|--------|--------|--------|--------|--------|--------|--------|--------|--------|--------|--------|--------|--------|--------|--------|--------|--------|--------|--------|--------|--------|--------|--------|--------|--------|--------|--------|--------|--------|--------|--------|--------|--------|--------|--------|--------|--------|--------|--------|--------|--------|--------|--------|--------|--------|--------|--------|--------|--------|--------|--------|--------|--------|--------|--------|--------|--------|--------|--------|--------|--------|--------|--------|--------|--------|--------|--------|--------|--------|--------|--------|--------|--------|--------|--------|--------|--------|--------|--------|--------|--------|--------|--------|--------|--------|--------|--------|--------|--------|--------|--------|--------|--------|--------|--------|--------|--------|--------|--------|--------|--------|--------|--------|--------|--------|--------|--------|--------|--------|--------|--------|--------|--------|--------|--------|--------|--------|--------|--------|--------|--------|--------|--------|--------|--------|--------|--------|--------|--------|--------|--------|--------|--------|--------|--------|--------|--------|--------|--------|--------|--------|--------|--------|--------|--------|--------|--------|--------|--------|--------|--------|--------|--------|--------|--------|--------|--------|--------|--------|--------|--------|--------|--------|--------|--------|--------|--------|--------|--------|--------|--------|--------|--------|--------|--------|--------|--------|--------|--------|--------|--------|--------|--------|--------|--------|--------|--------|--------|--------|--------|--------|--------|--------|--------|--------|--------|--------|--------|--------|--------|--------|--------|--------|--------|--------|--------|--------|--------|--------|--------|--------|--------|--------|--------|--------|--------|--------|--------|--------|--------|--------|--------|--------|--------|--------|--------|--------|--------|--------|--------|--------|--------|--------|--------|--------|--------|--------|--------|--------|--------|--------|--------|--------|--------|--------|--------|--------|--------|--------|--------|--------|--------|--------|--------|--------|--------|--------|--------|--------|--------|--------|--------|--------|--------|--------|--------|--------|--------|--------|--------|--------|--------|--------|--------|--------|--------|--------|--------|--------|--------|--------|--------|--------|--------|--------|--------|--------|--------|--------|--------|--------|--------|--------|--------|--------|--------|--------|--------|--------|--------|--------|--------|--------|--------|--------|--------|--------|--------|--------|--------|--------|--------|--------|--------|--------|--------|--------|--------|--------|--------|--------|--------|--------|--------|--------|--------|--------|--------|--------|--------|--------|--------|--------|--------|--------|--------|--------|--------|--------|--------|--------|--------|--------|--------|--------|--------|--------|--------|--------|--------|--------|--------|--------|--------|--------|--------|--------|--------|--------|--------|--------|--------|--------|--------|--------|--------|--------|--------|--------|--------|--------|--------|--------|--------|--------|--------|--------|--------|--------|--------|--------|--------|--------|--------|--------|--------|--------|--------|--------|--------|--------|--------|--------|--------|--------|--------|--------|--------|--------|--------|--------|--------|--------|--------|--------|--------|--------|--------|--------|--------|--------|--------|--------|--------|--------|--------|--------|--------|--------|--------|--------|--------|--------|--------|--------|--------|--------|--------|--------|--------|--------|--------|--------|--------|--------|--------|--------|--------|--------|--------|--------|--------|--------|--------|--------|--------|--------|--------|--------|--------|--------|--------|--------|--------|--------|--------|--------|--------|--------|--------|--------|--------|--------|--------|--------|--------|--------|--------|--------|--------|--------|--------|--------|--------|--------|--------|--------|--------|--------|--------|--------|--------|--------|--------|--------|--------|--------|--------|--------|--------|--------|--------|--------|--------|--------|--------|--------|--------|--------|--------|--------|--------|--------|--------|--------|--------|--------|--------|--------|--------|--------|--------|--------|--------|--------|--------|--------|--------|--------|--------|--------|--------|--------|--------|--------|--------|--------|--------|--------|--------|--------|--------|--------|--------|--------|--------|--------|--------|--------|--------|--------|--------|--------|--------|--------|--------|--------|--------|--------|--------|--------|--------|--------|--------|--------|--------|--------|--------|--------|--------|--------|--------|--------|--------|--------|--------|--------|--------|--------|--------|--------|--------|--------|--------|--------|--------|--------|--------|--------|--------|--------|--------|--------|--------|--------|--------|--------|--------|--------|--------|--------|--------|--------|--------|--------|--------|--------|--------|--------|--------|--------|--------|--------|--------|--------|--------|--------|--------|--------|--------|--------|--------|--------|--------|--------|--------|--------|--------|--------|--------|--------|--------|--------|--------|--------|--------|--------|--------|--------|--------|--------|--------|--------|--------|--------|--------|--------|--------|--------|--------|--------|--------|--------|--------|--------|--------|--------|--------|--------|--------|--------|--------|--------|--------|--------|--------|--------|--------|--------|--------|--------|--------|--------|--------|--------|--------|--------|--------|--------|--------|--------|--------|--------|--------|--------|--------|--------|--------|--------|--------|--------|--------|--------|--------|--------|--------|--------|--------|--------|--------|--------|--------|--------|--------|--------|-----|
| Romania  | 0.6376 | 0.6439 | 0.6497 | 0.6552 | 0.6604 | 0.6659 | 0.6710 | 0.6767 | 0.6823 | 0.6879 | 0.6931 | 0.6984 | 0.7038 | 0.7088 | 0.7135 | 0.7182 | 0.7228 | 0.7274 | 0.7319 | 0.7365 | 0.7411 | 0.7458 | 0.7504 | 0.7550 | 0.7596 | 0.7642 | 0.7688 | 0.7734 | 0.7780 | 0.7826 | 0.7872 | 0.7918 | 0.7964 | 0.8010 | 0.8056 | 0.8102 | 0.8148 | 0.8194 | 0.8240 | 0.8286 | 0.8332 | 0.8378 | 0.8424 | 0.8470 | 0.8516 | 0.8562 | 0.8608 | 0.8654 | 0.8700 | 0.8746 | 0.8792 | 0.8838 | 0.8884 | 0.8930 | 0.8976 | 0.9022 | 0.9068 | 0.9114 | 0.9160 | 0.9206 | 0.9252 | 0.9298 | 0.9344 | 0.9390 | 0.9436 | 0.9482 | 0.9528 | 0.9574 | 0.9620 | 0.9666 | 0.9712 | 0.9758 | 0.9804 | 0.9850 | 0.9896 | 0.9942 | 0.9988 | 1.0034 | 1.0080 | 1.0126 | 1.0172 | 1.0218 | 1.0264 | 1.0310 | 1.0356 | 1.0402 | 1.0448 | 1.0494 | 1.0540 | 1.0586 | 1.0632 | 1.0678 | 1.0724 | 1.0770 | 1.0816 | 1.0862 | 1.0908 | 1.0954 | 1.1000 | 1.1046 | 1.1092 | 1.1138 | 1.1184 | 1.1230 | 1.1276 | 1.1322 | 1.1368 | 1.1414 | 1.1460 | 1.1506 | 1.1552 | 1.1598 | 1.1644 | 1.1690 | 1.1736 | 1.1782 | 1.1828 | 1.1874 | 1.1920 | 1.1966 | 1.2012 | 1.2058 | 1.2104 | 1.2150 | 1.2196 | 1.2242 | 1.2288 | 1.2334 | 1.2380 | 1.2426 | 1.2472 | 1.2518 | 1.2564 | 1.2610 | 1.2656 | 1.2702 | 1.2748 | 1.2794 | 1.2840 | 1.2886 | 1.2932 | 1.2978 | 1.3024 | 1.3070 | 1.3116 | 1.3162 | 1.3208 | 1.3254 | 1.3300 | 1.3346 | 1.3392 | 1.3438 | 1.3484 | 1.3530 | 1.3576 | 1.3622 | 1.3668 | 1.3714 | 1.3760 | 1.3806 | 1.3852 | 1.3898 | 1.3944 | 1.3990 | 1.4036 | 1.4082 | 1.4128 | 1.4174 | 1.4220 | 1.4266 | 1.4312 | 1.4358 | 1.4404 | 1.4450 | 1.4496 | 1.4542 | 1.4588 | 1.4634 | 1.4680 | 1.4726 | 1.4772 | 1.4818 | 1.4864 | 1.4910 | 1.4956 | 1.5002 | 1.5048 | 1.5094 | 1.5140 | 1.5186 | 1.5232 | 1.5278 | 1.5324 | 1.5370 | 1.5416 | 1.5462 | 1.5508 | 1.5554 | 1.5600 | 1.5646 | 1.5692 | 1.5738 | 1.5784 | 1.5830 | 1.5876 | 1.5922 | 1.5968 | 1.6014 | 1.6060 | 1.6106 | 1.6152 | 1.6198 | 1.6244 | 1.6290 | 1.6336 | 1.6382 | 1.6428 | 1.6474 | 1.6520 | 1.6566 | 1.6612 | 1.6658 | 1.6704 | 1.6750 | 1.6796 | 1.6842 | 1.6888 | 1.6934 | 1.6980 | 1.7026 | 1.7072 | 1.7118 | 1.7164 | 1.7210 | 1.7256 | 1.7302 | 1.7348 | 1.7394 | 1.7440 | 1.7486 | 1.7532 | 1.7578 | 1.7624 | 1.7670 | 1.7716 | 1.7762 | 1.7808 | 1.7854 | 1.7900 | 1.7946 | 1.7992 | 1.8038 | 1.8084 | 1.8130 | 1.8176 | 1.8222 | 1.8268 | 1.8314 | 1.8360 | 1.8406 | 1.8452 | 1.8498 | 1.8544 | 1.8590 | 1.8636 | 1.8682 | 1.8728 | 1.8774 | 1.8820 | 1.8866 | 1.8912 | 1.8958 | 1.9004 | 1.9050 | 1.9096 | 1.9142 | 1.9188 | 1.9234 | 1.9280 | 1.9326 | 1.9372 | 1.9418 | 1.9464 | 1.9510 | 1.9556 | 1.9602 | 1.9648 | 1.9694 | 1.9740 | 1.9786 | 1.9832 | 1.9878 | 1.9924 | 1.9970 | 2.0016 | 2.0062 | 2.0108 | 2.0154 | 2.0200 | 2.0246 | 2.0292 | 2.0338 | 2.0384 | 2.0430 | 2.0476 | 2.0522 | 2.0568 | 2.0614 | 2.0660 | 2.0706 | 2.0752 | 2.0798 | 2.0844 | 2.0890 | 2.0936 | 2.0982 | 2.1028 | 2.1074 | 2.1120 | 2.1166 | 2.1212 | 2.1258 | 2.1304 | 2.1350 | 2.1396 | 2.1442 | 2.1488 | 2.1534 | 2.1580 | 2.1626 | 2.1672 | 2.1718 | 2.1764 | 2.1810 | 2.1856 | 2.1902 | 2.1948 | 2.1994 | 2.2040 | 2.2086 | 2.2132 | 2.2178 | 2.2224 | 2.2270 | 2.2316 | 2.2362 | 2.2408 | 2.2454 | 2.2500 | 2.2546 | 2.2592 | 2.2638 | 2.2684 | 2.2730 | 2.2776 | 2.2822 | 2.2868 | 2.2914 | 2.2960 | 2.3006 | 2.3052 | 2.3098 | 2.3144 | 2.3190 | 2.3236 | 2.3282 | 2.3328 | 2.3374 | 2.3420 | 2.3466 | 2.3512 | 2.3558 | 2.3604 | 2.3650 | 2.3696 | 2.3742 | 2.3788 | 2.3834 | 2.3880 | 2.3926 | 2.3972 | 2.4018 | 2.4064 | 2.4110 | 2.4156 | 2.4202 | 2.4248 | 2.4294 | 2.4340 | 2.4386 | 2.4432 | 2.4478 | 2.4524 | 2.4570 | 2.4616 | 2.4662 | 2.4708 | 2.4754 | 2.4800 | 2.4846 | 2.4892 | 2.4938 | 2.4984 | 2.5030 | 2.5076 | 2.5122 | 2.5168 | 2.5214 | 2.5260 | 2.5306 | 2.5352 | 2.5398 | 2.5444 | 2.5490 | 2.5536 | 2.5582 | 2.5628 | 2.5674 | 2.5720 | 2.5766 | 2.5812 | 2.5858 | 2.5904 | 2.5950 | 2.5996 | 2.6042 | 2.6088 | 2.6134 | 2.6180 | 2.6226 | 2.6272 | 2.6318 | 2.6364 | 2.6410 | 2.6456 | 2.6502 | 2.6548 | 2.6594 | 2.6640 | 2.6686 | 2.6732 | 2.6778 | 2.6824 | 2.6870 | 2.6916 | 2.6962 | 2.7008 | 2.7054 | 2.7100 | 2.7146 | 2.7192 | 2.7238 | 2.7284 | 2.7330 | 2.7376 | 2.7422 | 2.7468 | 2.7514 | 2.7560 | 2.7606 | 2.7652 | 2.7698 | 2.7744 | 2.7790 | 2.7836 | 2.7882 | 2.7928 | 2.7974 | 2.8020 | 2.8066 | 2.8112 | 2.8158 | 2.8204 | 2.8250 | 2.8296 | 2.8342 | 2.8388 | 2.8434 | 2.8480 | 2.8526 | 2.8572 | 2.8618 | 2.8664 | 2.8710 | 2.8756 | 2.8802 | 2.8848 | 2.8894 | 2.8940 | 2.8986 | 2.9032 | 2.9078 | 2.9124 | 2.9170 | 2.9216 | 2.9262 | 2.9308 | 2.9354 | 2.9400 | 2.9446 | 2.9492 | 2.9538 | 2.9584 | 2.9630 | 2.9676 | 2.9722 | 2.9768 | 2.9814 | 2.9860 | 2.9906 | 2.9952 | 3.0000 | 3.0046 | 3.0092 | 3.0138 | 3.0184 | 3.0230 | 3.0276 | 3.0322 | 3.0368 | 3.0414 | 3.0460 | 3.0506 | 3.0552 | 3.0598 | 3.0644 | 3.0690 | 3.0736 | 3.0782 | 3.0828 | 3.0874 | 3.0920 | 3.0966 | 3.1012 | 3.1058 | 3.1104 | 3.1150 | 3.1196 | 3.1242 | 3.1288 | 3.1334 | 3.1380 | 3.1426 | 3.1472 | 3.1518 | 3.1564 | 3.1610 | 3.1656 | 3.1702 | 3.1748 | 3.1794 | 3.1840 | 3.1886 | 3.1932 | 3.1978 | 3.2024 | 3.2070 | 3.2116 | 3.2162 | 3.2208 | 3.2254 | 3.2300 | 3.2346 | 3.2392 | 3.2438 | 3.2484 | 3.2530 | 3.2576 | 3.2622 | 3.2668 | 3.2714 | 3.2760 | 3.2806 | 3.2852 | 3.2898 | 3.2944 | 3.2990 | 3.3036 | 3.3082 | 3.3128 | 3.3174 | 3.3220 | 3.3266 | 3.3312 | 3.3358 | 3.3404 | 3.3450 | 3.3496 | 3.3542 | 3.3588 | 3.3634 | 3.3680 | 3.3726 | 3.3772 | 3.3818 | 3.3864 | 3.3910 | 3.3956 | 3.4002 | 3.4048 | 3.4094 | 3.4140 | 3.4186 | 3.4232 | 3.4278 | 3.4324 | 3.4370 | 3.4416 | 3.4462 | 3.4508 | 3.4554 | 3.4600 | 3.4646 | 3.4692 | 3.4738 | 3.4784 | 3.4830 | 3.4876 | 3.4922 | 3.4968 | 3.5014 | 3.5060 | 3.5106 | 3.5152 | 3.5198 | 3.5244 | 3.5290 | 3.5336 | 3.5382 | 3.5428 | 3.5474 | 3.5520 | 3.5566 | 3.5612 | 3.5658 | 3.5704 | 3.5750 | 3.5796 | 3.5842 | 3.5888 | 3.5934 | 3.5980 | 3.6026 | 3.6072 | 3.6118 | 3.6164 | 3.6210 | 3.6256 | 3.6302 | 3.6348 | 3.6394 | 3.6440 | 3.6486 | 3.6532 | 3.6578 | 3.6624 | 3.6670 | 3.6716 | 3.6762 | 3.6808 | 3.6854 | 3.6900 | 3.6946 | 3.6992 | 3.7038 | 3.7084 | 3.7130 | 3.7176 | 3.7222 | 3.7268 | 3.7314 | 3.7360 | 3.7406 | 3.7452 | 3.7498 | 3.7544 | 3.7590 | 3.7636 | 3.7682 | 3.7728 | 3.7774 | 3.7820 | 3.7866 | 3.7912 | 3.7958 | 3.8004 | 3.8050 | 3.8096 | 3.8142 | 3.8188 | 3.8234 | 3.8280 | 3.8326 | 3.8372 | 3.8418 | 3.8464 | 3.8510 | 3.8556 | 3.8602 | 3.8648 | 3.8694 | 3.8740 | 3.8786 | 3.8832 | 3.8878 | 3.8924 | 3.8970 | 3.9016 | 3.9062 | 3.9108 | 3.9154 | 3.9200 | 3.9246 | 3.9292 | 3.9338 | 3.9384 | 3.9430 | 3.9476 | 3.9522 | 3.9568 | 3.9614 | 3.9660 | 3.9706 | 3.9752 | 3.9798 | 3.9844 | 3.9890 | 3.9936 | 3.9982 | 4.0028 | 4.0074 | 4.0120 | 4.0166 | 4.0212 | 4.0258 | 4.0304 | 4.0350 | 4.0396 | 4.0442 | 4.0488 | 4.0534 | 4.0580 | 4.0626 | 4.0672 | 4.0718 | 4.0764 | 4.0810 | 4.0856 | 4.0902 | 4.0948 | 4.0994 | 4.1040 | 4.1086 | 4.1132 | 4.1178 | 4.1224 | 4.1270 | 4.1316 | 4.1362 | 4.1408 | 4.1454 | 4.1500 | 4.1546 | 4.1592 | 4.1638 | 4.1684 | 4.1730 | 4.1776 | 4.1822 | 4.1868 | 4.1914 | 4.1960 | 4.2006 | 4.2052 | 4.2098 | 4.2144 | 4.2190 | 4.2236 | 4.2282 | 4.2328 | 4.2374 | 4.2420 | 4.2466 | 4.2512 | 4.2558 | 4.2604 | 4.2650 | 4.2696 | 4.2742 | 4.2788 | 4.2834 | 4.2880 | 4.2926 | 4.2972 | 4.3018 | 4.3064 | 4.3110 | 4.3156 | 4.3202 | 4.3248 | 4.3294 | 4.3340 | 4.3386 | 4.3432 | 4.3478 | 4.3524 | 4.3570 | 4.3616 | 4.3662 | 4.3708 | 4.3754 | 4.3800 | 4.3846 | 4.3892 | 4.3938 | 4.3984 | 4.4030 | 4.4076 | 4.4122 | 4.4168 | 4.4214 | 4.4260 | 4.4306 | 4.4352 | 4.4398 | 4.4444 | 4.4490 | 4.4536 | 4.4582 | 4.4628 | 4.4674 | 4.4720 | 4.4766 | 4.4812 | 4.4858 | 4.4904 | 4.4950 | 4.4996 | 4.5042 | 4.5088 | 4.5134 | 4.5180 | 4.5226 | 4.5272 | 4.5318 | 4.5364 | 4.5410 | 4.5456 | 4.5502 | 4.5548 | 4.5594 | 4.5640 | 4.5686 | 4.5732 | 4.5778 | 4.5824 | 4.5870 | 4.5916 | 4.5962 | 4.6008 | 4.6054 | 4.6100 | 4.6146 | 4.6192 | 4.6238 | 4.6284 | 4.6330 | 4.6376 | 4.6422 | 4.6468 | 4.6514 | 4.6560 | 4.6606 | 4.6652 | 4.6698 | 4.6744 | 4.6790 | 4.6836 | 4.6882 | 4.6928 | 4.6974 | 4.7020 | 4.7066 | 4.7112 | 4.7158 | 4.7204 | 4.7250 | 4.7296 | 4.7342 | 4.7388 | 4.7434 | 4.7480 | 4.7526 | 4.7572 | 4.7618 | 4.7664 | 4.7710 | 4.7756 | 4.7802 | 4.7848 | 4.7894 | 4.7940 | 4.7986 | 4.8032 | 4.8078 | 4.8124 | 4.8170 | 4.8216 | 4.8262 | 4.8308 | 4.8354 | 4.8400 | 4.8446 | 4.8492 | 4.8538 | 4.8584 | 4.8630 | 4.8676 | 4.8722 | 4.8768 | 4.8814 | 4.8860 | 4.8906 | 4.8952 | 4.8998 | 4.9044 | 4.9090 | 4.9136 | 4.9182 | 4.9228 | 4.9274 | 4.9320 | 4.9366 | 4.9412 | 4.9458 | 4.9504 | 4.9550 | 4.9596 | 4.9642 | 4.9688 | 4.9734 | 4.9780 | 4.9826 | 4.9872 | 4.9918 | 4.9964 | 5.0010 | 5.0056 | 5.0102 | 5.0148 | 5.0194 | 5.0240 | 5.0286 | 5.0332 | 5.0378 | 5.0424 | 5.0470 | 5.0516 | 5.0562 | 5.0608 | 5.0654 | 5.0700 | 5.0746 | 5.0792 | 5.0838 | 5.0884 | 5.0930 | 5.0976 | 5.1022 | 5.1068 | 5.1114 | 5.1160 | 5.1206 | 5.1252 | 5.1298 | 5.1344 | 5.1390 | 5.1436 | 5.1482 | 5.1528 | 5.1574 | 5.1620 | 5.1666 | 5.1712 | 5.1758 | 5.1804 | 5.1850 | 5.1896 | 5.1942 | 5.1988 | 5.2034 | 5.2080 | 5.2126 | 5.2172 | 5.2218 | 5.2264 | 5.2310 | 5.2356 | 5.2402 | 5.2448 | 5.2494 | 5.2540 | 5.2586 | 5.2632 | 5.2678 | 5.2724 | 5.2770 | 5.2816 | 5.2862 | 5.2908 | 5.2954 | 5.3000 | 5.3046 | 5.3092 | 5.3138 | 5.3184 | 5.3230 | 5.3276 | 5.3322 | 5.3368 | 5.3414 | 5.3460 | 5.3506 | 5.3552 | 5.3598 | 5.3644 | 5.3690 | 5.3736 | 5.3782 | 5.3828 | 5.3874 | 5.3920 | 5.3966 | 5.4012 | 5.4058 | 5.4104 | 5.4150 | 5.4196 | 5.4242 | 5.4288 | 5.4334 | 5.4380 | 5.4426 | 5.4472 | 5.4518 | 5.4564 | 5.4610 | 5.4656 | 5.4702 | 5.4748 | 5.4794 | 5.4840 | 5.4886 | 5.4932 | 5.4978 | 5.5024 | 5.5070 | 5.5116 | 5.5162 | 5.5208 | 5.5254 | 5.5300 | 5.5346 | 5.5392 | 5.5438 | 5.5484 | 5.5530 | 5.5576 | 5.5622 | 5.5668 | 5.5714 | 5.5760 | 5.5806 | 5.5852 | 5.5898 | 5.5944 | 5.5990 | 5.6036 | 5.6082 | 5.6128 | 5.6 |

Appendix Table 5. Socio-Demographic Index values for all estimated GBD 2015 locations, 1980-2015

| Location                    | 1980   | 1981   | 1982   | 1983   | 1984   | 1985   | 1986   | 1987   | 1988   | 1989   | 1990   | 1991   | 1992   | 1993   | 1994   | 1995   | 1996   | 1997   | 1998   | 1999   | 2000   | 2001   | 2002   | 2003   | 2004   | 2005   | 2006   | 2007   | 2008   | 2009   | 2010   | 2011   | 2012   | 2013   | 2014   | 2015   |        |        |
|-----------------------------|--------|--------|--------|--------|--------|--------|--------|--------|--------|--------|--------|--------|--------|--------|--------|--------|--------|--------|--------|--------|--------|--------|--------|--------|--------|--------|--------|--------|--------|--------|--------|--------|--------|--------|--------|--------|--------|--------|
| Spain                       | 0.5816 | 0.5902 | 0.5987 | 0.6067 | 0.6146 | 0.6222 | 0.6299 | 0.6377 | 0.6457 | 0.6532 | 0.6602 | 0.6674 | 0.6743 | 0.6810 | 0.6874 | 0.6937 | 0.7000 | 0.7074 | 0.7141 | 0.7206 | 0.7271 | 0.7338 | 0.7404 | 0.7469 | 0.7532 | 0.7592 | 0.7653 | 0.7717 | 0.7783 | 0.7848 | 0.7899 | 0.7950 | 0.8001 | 0.8050 | 0.8096 | 0.8143 | 0.8192 |        |
| Sweden                      | 0.7422 | 0.7473 | 0.7518 | 0.7557 | 0.7596 | 0.7632 | 0.7669 | 0.7706 | 0.7744 | 0.7785 | 0.7822 | 0.7861 | 0.7894 | 0.7930 | 0.7967 | 0.8001 | 0.8039 | 0.8078 | 0.8119 | 0.8158 | 0.8206 | 0.8230 | 0.8245 | 0.8288 | 0.8324 | 0.8354 | 0.8384 | 0.8411 | 0.8442 | 0.8477 | 0.8508 | 0.8539 | 0.8569 | 0.8599 | 0.8631 | 0.8661 | 0.8691 | 0.8721 |
| Switzerland                 | 0.7739 | 0.7785 | 0.7828 | 0.7865 | 0.7905 | 0.7939 | 0.7977 | 0.8017 | 0.8057 | 0.8099 | 0.8144 | 0.8188 | 0.8232 | 0.8274 | 0.8317 | 0.8361 | 0.8404 | 0.8447 | 0.8491 | 0.8535 | 0.8578 | 0.8621 | 0.8665 | 0.8708 | 0.8752 | 0.8796 | 0.8840 | 0.8884 | 0.8927 | 0.8970 | 0.9013 | 0.9056 | 0.9099 | 0.9141 | 0.9184 | 0.9227 | 0.9269 | 0.9312 |
| United Kingdom              | 0.7844 | 0.7814 | 0.7800 | 0.7807 | 0.7816 | 0.7826 | 0.7836 | 0.7846 | 0.7856 | 0.7866 | 0.7876 | 0.7886 | 0.7896 | 0.7906 | 0.7916 | 0.7926 | 0.7936 | 0.7946 | 0.7956 | 0.7966 | 0.7976 | 0.7986 | 0.7996 | 0.8006 | 0.8016 | 0.8026 | 0.8036 | 0.8046 | 0.8056 | 0.8066 | 0.8076 | 0.8086 | 0.8096 | 0.8106 | 0.8116 | 0.8126 | 0.8136 |        |
| England                     | 0.7408 | 0.7458 | 0.7496 | 0.7534 | 0.7572 | 0.7610 | 0.7648 | 0.7686 | 0.7724 | 0.7762 | 0.7800 | 0.7838 | 0.7876 | 0.7914 | 0.7952 | 0.7990 | 0.8028 | 0.8066 | 0.8104 | 0.8142 | 0.8180 | 0.8218 | 0.8256 | 0.8294 | 0.8332 | 0.8370 | 0.8408 | 0.8446 | 0.8484 | 0.8522 | 0.8560 | 0.8598 | 0.8636 | 0.8674 | 0.8712 | 0.8750 | 0.8788 | 0.8826 |
| East Midlands               | 0.7468 | 0.7418 | 0.7466 | 0.7509 | 0.7552 | 0.7594 | 0.7637 | 0.7679 | 0.7721 | 0.7763 | 0.7805 | 0.7847 | 0.7889 | 0.7931 | 0.7973 | 0.8015 | 0.8057 | 0.8099 | 0.8141 | 0.8183 | 0.8225 | 0.8267 | 0.8309 | 0.8351 | 0.8393 | 0.8435 | 0.8477 | 0.8519 | 0.8561 | 0.8603 | 0.8645 | 0.8687 | 0.8729 | 0.8771 | 0.8813 | 0.8855 | 0.8897 | 0.8939 |
| East of England             | 0.6853 | 0.6901 | 0.6957 | 0.7003 | 0.7047 | 0.7091 | 0.7135 | 0.7179 | 0.7223 | 0.7267 | 0.7311 | 0.7355 | 0.7399 | 0.7443 | 0.7487 | 0.7531 | 0.7575 | 0.7619 | 0.7663 | 0.7707 | 0.7751 | 0.7795 | 0.7839 | 0.7883 | 0.7927 | 0.7971 | 0.8015 | 0.8059 | 0.8103 | 0.8147 | 0.8191 | 0.8235 | 0.8279 | 0.8323 | 0.8367 | 0.8411 | 0.8455 | 0.8499 |
| Greater London              | 0.8159 | 0.8208 | 0.8257 | 0.8311 | 0.8373 | 0.8432 | 0.8493 | 0.8557 | 0.8623 | 0.8691 | 0.8760 | 0.8831 | 0.8904 | 0.8979 | 0.9056 | 0.9134 | 0.9213 | 0.9293 | 0.9374 | 0.9456 | 0.9539 | 0.9623 | 0.9707 | 0.9792 | 0.9877 | 0.9962 | 1.0047 | 1.0132 | 1.0217 | 1.0302 | 1.0387 | 1.0472 | 1.0557 | 1.0642 | 1.0727 | 1.0812 | 1.0897 |        |
| North East England          | 0.6242 | 0.6291 | 0.6345 | 0.6404 | 0.6468 | 0.6536 | 0.6609 | 0.6687 | 0.6770 | 0.6858 | 0.6956 | 0.7054 | 0.7152 | 0.7250 | 0.7348 | 0.7446 | 0.7544 | 0.7642 | 0.7740 | 0.7838 | 0.7936 | 0.8034 | 0.8132 | 0.8230 | 0.8328 | 0.8426 | 0.8524 | 0.8622 | 0.8720 | 0.8818 | 0.8916 | 0.9014 | 0.9112 | 0.9210 | 0.9308 | 0.9406 | 0.9504 | 0.9602 |
| North West England          | 0.6298 | 0.7346 | 0.7382 | 0.7424 | 0.7462 | 0.7496 | 0.7525 | 0.7553 | 0.7583 | 0.7608 | 0.7629 | 0.7649 | 0.7669 | 0.7689 | 0.7709 | 0.7729 | 0.7749 | 0.7769 | 0.7789 | 0.7809 | 0.7829 | 0.7849 | 0.7869 | 0.7889 | 0.7909 | 0.7929 | 0.7949 | 0.7969 | 0.7989 | 0.7999 | 0.8009 | 0.8019 | 0.8029 | 0.8039 | 0.8049 | 0.8059 | 0.8069 |        |
| South East England          | 0.7633 | 0.7682 | 0.7736 | 0.7780 | 0.7830 | 0.7878 | 0.7932 | 0.7975 | 0.8031 | 0.8086 | 0.8144 | 0.8204 | 0.8249 | 0.8294 | 0.8342 | 0.8390 | 0.8437 | 0.8485 | 0.8532 | 0.8580 | 0.8628 | 0.8676 | 0.8724 | 0.8772 | 0.8820 | 0.8868 | 0.8916 | 0.8964 | 0.9012 | 0.9060 | 0.9108 | 0.9156 | 0.9204 | 0.9252 | 0.9300 | 0.9348 | 0.9396 | 0.9444 |
| South West England          | 0.7435 | 0.7487 | 0.7528 | 0.7581 | 0.7628 | 0.7681 | 0.7732 | 0.7786 | 0.7847 | 0.7899 | 0.7966 | 0.8030 | 0.8080 | 0.8126 | 0.8177 | 0.8240 | 0.8288 | 0.8348 | 0.8407 | 0.8469 | 0.8539 | 0.8599 | 0.8661 | 0.8724 | 0.8786 | 0.8849 | 0.8912 | 0.8975 | 0.9038 | 0.9101 | 0.9164 | 0.9227 | 0.9290 | 0.9353 | 0.9416 | 0.9479 | 0.9542 | 0.9605 |
| West Midlands               | 0.7326 | 0.7374 | 0.7401 | 0.7446 | 0.7494 | 0.7547 | 0.7601 | 0.7659 | 0.7729 | 0.7778 | 0.7837 | 0.7893 | 0.7953 | 0.8005 | 0.8067 | 0.8110 | 0.8171 | 0.8211 | 0.8276 | 0.8333 | 0.8392 | 0.8446 | 0.8495 | 0.8557 | 0.8606 | 0.8663 | 0.8719 | 0.8774 | 0.8829 | 0.8884 | 0.8939 | 0.8994 | 0.9049 | 0.9104 | 0.9159 | 0.9214 | 0.9269 | 0.9324 |
| Yorkshire and the Humber    | 0.7297 | 0.7347 | 0.7402 | 0.7432 | 0.7485 | 0.7538 | 0.7587 | 0.7651 | 0.7719 | 0.7784 | 0.7841 | 0.7896 | 0.7950 | 0.8000 | 0.8059 | 0.8102 | 0.8161 | 0.8226 | 0.8282 | 0.8340 | 0.8406 | 0.8461 | 0.8516 | 0.8567 | 0.8616 | 0.8667 | 0.8715 | 0.8761 | 0.8808 | 0.8855 | 0.8902 | 0.8949 | 0.8996 | 0.9043 | 0.9090 | 0.9137 | 0.9184 | 0.9231 |
| Northern Ireland            | 0.6186 | 0.6278 | 0.6354 | 0.6409 | 0.6461 | 0.6511 | 0.6564 | 0.6606 | 0.6656 | 0.6706 | 0.6756 | 0.6806 | 0.6856 | 0.6906 | 0.6956 | 0.7006 | 0.7056 | 0.7106 | 0.7156 | 0.7206 | 0.7256 | 0.7306 | 0.7356 | 0.7406 | 0.7456 | 0.7506 | 0.7556 | 0.7606 | 0.7656 | 0.7706 | 0.7756 | 0.7806 | 0.7856 | 0.7906 | 0.7956 | 0.8006 | 0.8056 |        |
| Scotland                    | 0.7442 | 0.7488 | 0.7572 | 0.7629 | 0.7683 | 0.7735 | 0.7794 | 0.7858 | 0.7922 | 0.7996 | 0.8051 | 0.8090 | 0.8142 | 0.8201 | 0.8261 | 0.8311 | 0.8371 | 0.8417 | 0.8483 | 0.8539 | 0.8606 | 0.8673 | 0.8733 | 0.8792 | 0.8851 | 0.8910 | 0.8969 | 0.9028 | 0.9087 | 0.9146 | 0.9205 | 0.9264 | 0.9323 | 0.9382 | 0.9441 | 0.9500 | 0.9559 | 0.9618 |
| Wales                       | 0.7128 | 0.7179 | 0.7215 | 0.7271 | 0.7322 | 0.7376 | 0.7431 | 0.7486 | 0.7541 | 0.7596 | 0.7651 | 0.7706 | 0.7761 | 0.7816 | 0.7871 | 0.7926 | 0.7981 | 0.8036 | 0.8091 | 0.8146 | 0.8201 | 0.8256 | 0.8311 | 0.8366 | 0.8421 | 0.8476 | 0.8531 | 0.8586 | 0.8641 | 0.8696 | 0.8751 | 0.8806 | 0.8861 | 0.8916 | 0.8971 | 0.9026 | 0.9081 | 0.9136 |
| Southern Latin America      | 0.5788 | 0.5846 | 0.5924 | 0.5941 | 0.5986 | 0.6023 | 0.6074 | 0.6124 | 0.6171 | 0.6216 | 0.6261 | 0.6311 | 0.6369 | 0.6444 | 0.6543 | 0.6619 | 0.6703 | 0.6788 | 0.6873 | 0.6962 | 0.7054 | 0.7149 | 0.7244 | 0.7339 | 0.7434 | 0.7529 | 0.7624 | 0.7719 | 0.7814 | 0.7909 | 0.8004 | 0.8100 | 0.8195 | 0.8290 | 0.8385 | 0.8480 | 0.8575 |        |
| Argentina                   | 0.5788 | 0.5819 | 0.5888 | 0.5920 | 0.5999 | 0.6066 | 0.6092 | 0.6114 | 0.6159 | 0.6196 | 0.6234 | 0.6285 | 0.6332 | 0.6425 | 0.6504 | 0.6576 | 0.6660 | 0.6743 | 0.6829 | 0.6881 | 0.6934 | 0.6975 | 0.7001 | 0.7022 | 0.7070 | 0.7117 | 0.7172 | 0.7224 | 0.7278 | 0.7333 | 0.7387 | 0.7442 | 0.7497 | 0.7551 | 0.7611 | 0.7671 | 0.7720 |        |
| Uruguay                     | 0.6692 | 0.6741 | 0.6806 | 0.6823 | 0.6862 | 0.6900 | 0.6941 | 0.6987 | 0.7036 | 0.7071 | 0.7106 | 0.7144 | 0.7182 | 0.7220 | 0.7258 | 0.7296 | 0.7334 | 0.7372 | 0.7410 | 0.7448 | 0.7486 | 0.7524 | 0.7562 | 0.7600 | 0.7638 | 0.7676 | 0.7714 | 0.7752 | 0.7790 | 0.7828 | 0.7866 | 0.7904 | 0.7942 | 0.7980 | 0.8018 | 0.8056 | 0.8094 |        |
| Latin America North America | 0.8377 | 0.8410 | 0.8431 | 0.8442 | 0.8479 | 0.8498 | 0.8514 | 0.8537 | 0.8569 | 0.8602 | 0.8643 | 0.8682 | 0.8731 | 0.8760 | 0.8800 | 0.8849 | 0.8897 | 0.8949 | 0.8997 | 0.9049 | 0.9095 | 0.9142 | 0.9189 | 0.9236 | 0.9283 | 0.9330 | 0.9377 | 0.9424 | 0.9471 | 0.9518 | 0.9565 | 0.9612 | 0.9659 | 0.9706 | 0.9753 | 0.9800 | 0.9847 |        |
| Canada                      | 0.8144 | 0.8201 | 0.8247 | 0.8290 | 0.8334 | 0.8379 | 0.8421 | 0.8461 | 0.8504 | 0.8546 | 0.8583 | 0.8617 | 0.8650 | 0.8684 | 0.8718 | 0.8753 | 0.8787 | 0.8821 | 0.8855 | 0.8890 | 0.8924 | 0.8959 | 0.8994 | 0.9029 | 0.9064 | 0.9100 | 0.9135 | 0.9170 | 0.9205 | 0.9240 | 0.9275 | 0.9310 | 0.9345 | 0.9380 | 0.9415 | 0.9450 | 0.9485 |        |
| Greenland                   | 0.5788 | 0.5883 | 0.5985 | 0.6169 | 0.6158 | 0.6179 | 0.6281 | 0.6275 | 0.6494 | 0.6155 | 0.6459 | 0.6154 | 0.5999 | 0.6086 | 0.6148 | 0.6207 | 0.6275 | 0.6389 | 0.6406 | 0.6481 | 0.6620 | 0.6459 | 0.6420 | 0.6688 | 0.6648 | 0.6729 | 0.6696 | 0.6907 | 0.7003 | 0.6923 | 0.7022 | 0.7139 | 0.7124 | 0.7066 | 0.7252 | 0.7439 | 0.7412 |        |
| United States               | 0.8403 | 0.8433 | 0.8451 | 0.8470 | 0.8488 | 0.8522 | 0.8547 | 0.8568 | 0.8588 | 0.8608 | 0.8628 | 0.8646 | 0.8666 | 0.8686 | 0.8706 | 0.8727 | 0.8759 | 0.8789 | 0.8816 | 0.8845 | 0.8874 | 0.8899 | 0.8921 | 0.8951 | 0.8984 | 0.8999 | 0.9029 | 0.9055 | 0.9090 | 0.9123 | 0.9155 | 0.9188 | 0.9221 | 0.9252 | 0.9282 | 0.9311 | 0.9340 |        |
| Alabama                     | 0.8073 | 0.8121 | 0.8154 | 0.8175 | 0.8202 | 0.8240 | 0.8268 | 0.8299 | 0.8323 | 0.8346 | 0.8384 | 0.8414 | 0.8447 | 0.8476 | 0.8509 | 0.8537 | 0.8566 | 0.8588 | 0.8618 | 0.8646 | 0.8674 | 0.8723 | 0.8760 | 0.8790 | 0.8824 | 0.8851 | 0.8877 | 0.8904 | 0.8930 | 0.8966 | 0.9005 | 0.9034 | 0.9071 | 0.9096 | 0.9124 | 0.9153 | 0.9182 | 0.9211 |
| Alaska                      | 0.8805 | 0.8768 | 0.8723 | 0.8714 | 0.8702 | 0.8701 | 0.8738 | 0.8740 | 0.8784 | 0.8770 | 0.8757 | 0.8747 | 0.8724 | 0.8735 | 0.8779 | 0.8801 | 0.8819 | 0.8827 | 0.8849 | 0.8866 | 0.8901 | 0.8899 | 0.8923 | 0.8951 | 0.8964 | 0.8994 | 0.9017 | 0.9042 | 0.9065 | 0.9095 | 0.9113 | 0.9142 | 0.9163 | 0.9184 | 0.9203 | 0.9224 | 0.9245 |        |
| Arizona                     | 0.8369 | 0.8392 | 0.8412 | 0.8412 | 0.8440 | 0.8443 | 0.8466 | 0.8481 | 0.8498 | 0.8524 | 0.8527 | 0.8548 | 0.8556 | 0.8569 | 0.8586 | 0.8599 | 0.8604 | 0.8646 | 0.8674 | 0.8688 | 0.8698 | 0.8723 | 0.8730 | 0.8743 | 0.8758 | 0.8760 | 0.8817 | 0.8873 | 0.8931 | 0.8995 | 0.9043 | 0.9080 | 0.9101 | 0.9122 | 0.9156 | 0.9195 | 0.9239 |        |
| Arkansas                    | 0.8287 | 0.8335 | 0.8355 | 0.8364 | 0.8400 | 0.8412 | 0.8438 | 0.8450 | 0.8459 | 0.8467 | 0.8483 | 0.8517 | 0.8557 | 0.8557 | 0.8564 | 0.8570 | 0.8571 | 0.8580 | 0.8620 | 0.8650 | 0.8666 | 0.8692 | 0.8699 | 0.8725 | 0.8739 | 0.8761 | 0.8783 | 0.8818 | 0.8853 | 0.8889 | 0.8919 | 0.8958 | 0.8990 | 0.9019 | 0.9058 | 0.9099 | 0.9149 |        |
| California                  | 0.854  |        |        |        |        |        |        |        |        |        |        |        |        |        |        |        |        |        |        |        |        |        |        |        |        |        |        |        |        |        |        |        |        |        |        |        |        |        |

Appendix Table 5. Socio-Demographic Index values for all estimated GBD 2015 locations, 1980-2015

| Location                         | 1980   | 1981   | 1982   | 1983   | 1984   | 1985   | 1986   | 1987   | 1988   | 1989   | 1990   | 1991   | 1992   | 1993   | 1994   | 1995   | 1996   | 1997   | 1998   | 1999   | 2000   | 2001   | 2002   | 2003   | 2004   | 2005   | 2006   | 2007   | 2008   | 2009   | 2010   | 2011   | 2012   | 2013   | 2014   | 2015   |        |        |
|----------------------------------|--------|--------|--------|--------|--------|--------|--------|--------|--------|--------|--------|--------|--------|--------|--------|--------|--------|--------|--------|--------|--------|--------|--------|--------|--------|--------|--------|--------|--------|--------|--------|--------|--------|--------|--------|--------|--------|--------|
| Dominican Republic               | 0.4344 | 0.4437 | 0.4523 | 0.4607 | 0.4685 | 0.4756 | 0.4826 | 0.4899 | 0.4971 | 0.5039 | 0.5096 | 0.5151 | 0.5213 | 0.5281 | 0.5348 | 0.5418 | 0.5491 | 0.5568 | 0.5647 | 0.5726 | 0.5803 | 0.5875 | 0.5946 | 0.6007 | 0.6065 | 0.6130 | 0.6202 | 0.6280 | 0.6353 | 0.6422 | 0.6495 | 0.6565 | 0.6632 | 0.6699 | 0.6768 | 0.6837 |        |        |
| Grenada                          | 0.4761 | 0.4858 | 0.4958 | 0.5055 | 0.5149 | 0.5242 | 0.5336 | 0.5429 | 0.5522 | 0.5614 | 0.5688 | 0.5762 | 0.5838 | 0.5914 | 0.6016 | 0.6136 | 0.6236 | 0.6329 | 0.6423 | 0.6521 | 0.6618 | 0.6706 | 0.6791 | 0.6879 | 0.6954 | 0.7035 | 0.7102 | 0.7189 | 0.7231 | 0.7278 | 0.7323 | 0.7366 | 0.7404 | 0.7444 | 0.7488 | 0.7532 |        |        |
| Guatemala                        | 0.4605 | 0.4661 | 0.4698 | 0.4715 | 0.4735 | 0.4762 | 0.4795 | 0.4832 | 0.4866 | 0.4892 | 0.4917 | 0.4946 | 0.4966 | 0.4986 | 0.5149 | 0.5239 | 0.5335 | 0.5432 | 0.5521 | 0.5622 | 0.5680 | 0.5699 | 0.5751 | 0.5794 | 0.5841 | 0.5885 | 0.5939 | 0.6000 | 0.6068 | 0.6112 | 0.6165 | 0.6243 | 0.6320 | 0.6407 | 0.6472 | 0.6546 |        |        |
| Haiti                            | 0.2545 | 0.2580 | 0.2617 | 0.2661 | 0.2710 | 0.2766 | 0.2820 | 0.2876 | 0.2933 | 0.2986 | 0.3035 | 0.3085 | 0.3132 | 0.3183 | 0.3185 | 0.3218 | 0.3254 | 0.3295 | 0.3341 | 0.3392 | 0.3444 | 0.3494 | 0.3542 | 0.3590 | 0.3629 | 0.3666 | 0.3705 | 0.3748 | 0.3790 | 0.3836 | 0.3871 | 0.3914 | 0.3960 | 0.4012 | 0.4065 | 0.4116 | 0.4165 |        |
| India                            | 0.5301 | 0.5345 | 0.5393 | 0.5447 | 0.5507 | 0.5565 | 0.5620 | 0.5672 | 0.5725 | 0.5785 | 0.5841 | 0.5893 | 0.5946 | 0.6002 | 0.6054 | 0.6102 | 0.6150 | 0.6200 | 0.6255 | 0.6305 | 0.6355 | 0.6404 | 0.6454 | 0.6503 | 0.6552 | 0.6601 | 0.6650 | 0.6699 | 0.6748 | 0.6800 | 0.6855 | 0.6908 | 0.6954 | 0.6998 | 0.7039 | 0.7078 | 0.7116 | 0.7153 |
| Indonesia                        | 0.7052 | 0.7130 | 0.7217 | 0.7278 | 0.7320 | 0.7380 | 0.7444 | 0.7506 | 0.7567 | 0.7627 | 0.7684 | 0.7742 | 0.7801 | 0.7860 | 0.7919 | 0.7978 | 0.8037 | 0.8097 | 0.8157 | 0.8214 | 0.8265 | 0.8326 | 0.8382 | 0.8433 | 0.8482 | 0.8528 | 0.8571 | 0.8608 | 0.8641 | 0.8670 | 0.8701 | 0.8736 | 0.8769 | 0.8804 | 0.8833 | 0.8871 | 0.8906 |        |
| Saint Lucia                      | 0.4002 | 0.4029 | 0.4062 | 0.4100 | 0.4139 | 0.4182 | 0.4228 | 0.4276 | 0.4326 | 0.4376 | 0.4426 | 0.4476 | 0.4526 | 0.4576 | 0.4626 | 0.4676 | 0.4726 | 0.4776 | 0.4826 | 0.4876 | 0.4926 | 0.4976 | 0.5026 | 0.5076 | 0.5126 | 0.5176 | 0.5226 | 0.5276 | 0.5326 | 0.5376 | 0.5426 | 0.5476 | 0.5526 | 0.5576 | 0.5626 | 0.5676 | 0.5726 |        |
| Saint Vincent and the Grenadines | 0.4982 | 0.5023 | 0.5125 | 0.5226 | 0.5329 | 0.5430 | 0.5528 | 0.5629 | 0.5722 | 0.5815 | 0.5907 | 0.6001 | 0.6113 | 0.6196 | 0.6264 | 0.6340 | 0.6415 | 0.6488 | 0.6561 | 0.6634 | 0.6707 | 0.6779 | 0.6851 | 0.6922 | 0.6992 | 0.7062 | 0.7131 | 0.7200 | 0.7269 | 0.7338 | 0.7407 | 0.7476 | 0.7545 | 0.7614 | 0.7683 | 0.7752 | 0.7821 |        |
| Suriname                         | 0.4876 | 0.4958 | 0.5025 | 0.5082 | 0.5132 | 0.5186 | 0.5242 | 0.5292 | 0.5353 | 0.5416 | 0.5476 | 0.5529 | 0.5581 | 0.5625 | 0.5667 | 0.5710 | 0.5767 | 0.5829 | 0.5891 | 0.5943 | 0.5996 | 0.6058 | 0.6121 | 0.6189 | 0.6262 | 0.6335 | 0.6408 | 0.6482 | 0.6557 | 0.6630 | 0.6703 | 0.6776 | 0.6847 | 0.6914 | 0.6977 | 0.7037 |        |        |
| Tandjavia and Tobago             | 0.6293 | 0.6364 | 0.6430 | 0.6485 | 0.6536 | 0.6586 | 0.6643 | 0.6688 | 0.6731 | 0.6770 | 0.6813 | 0.6863 | 0.6909 | 0.6953 | 0.7002 | 0.7053 | 0.7111 | 0.7171 | 0.7237 | 0.7303 | 0.7368 | 0.7435 | 0.7501 | 0.7568 | 0.7635 | 0.7702 | 0.7769 | 0.7836 | 0.7903 | 0.8014 | 0.8068 | 0.8115 | 0.8164 | 0.8209 | 0.8251 | 0.8290 |        |        |
| Virgin Islands, U.S.             | 0.6970 | 0.7072 | 0.7166 | 0.7255 | 0.7332 | 0.7402 | 0.7466 | 0.7523 | 0.7582 | 0.7643 | 0.7707 | 0.7774 | 0.7840 | 0.7907 | 0.7976 | 0.8048 | 0.8123 | 0.8206 | 0.8311 | 0.8393 | 0.8441 | 0.8490 | 0.8527 | 0.8554 | 0.8577 | 0.8617 | 0.8662 | 0.8702 | 0.8743 | 0.8785 | 0.8827 | 0.8870 | 0.8913 | 0.8956 | 0.8998 | 0.9041 |        |        |
| Andean Latin America             | 0.4513 | 0.4600 | 0.4683 | 0.4758 | 0.4832 | 0.4899 | 0.4967 | 0.5036 | 0.5099 | 0.5148 | 0.5197 | 0.5247 | 0.5298 | 0.5345 | 0.5415 | 0.5482 | 0.5550 | 0.5622 | 0.5690 | 0.5753 | 0.5815 | 0.5874 | 0.5933 | 0.5992 | 0.6054 | 0.6119 | 0.6190 | 0.6262 | 0.6338 | 0.6406 | 0.6477 | 0.6550 | 0.6622 | 0.6694 | 0.6761 | 0.6824 |        |        |
| Bolivia                          | 0.3764 | 0.3825 | 0.3884 | 0.3939 | 0.3995 | 0.4050 | 0.4098 | 0.4146 | 0.4193 | 0.4244 | 0.4300 | 0.4363 | 0.4426 | 0.4494 | 0.4565 | 0.4641 | 0.4719 | 0.4798 | 0.4879 | 0.4955 | 0.5028 | 0.5100 | 0.5169 | 0.5237 | 0.5306 | 0.5377 | 0.5451 | 0.5524 | 0.5600 | 0.5673 | 0.5746 | 0.5822 | 0.5898 | 0.5975 | 0.6049 | 0.6120 |        |        |
| Ecuador                          | 0.4627 | 0.4724 | 0.4811 | 0.4888 | 0.4962 | 0.5034 | 0.5101 | 0.5158 | 0.5222 | 0.5283 | 0.5347 | 0.5411 | 0.5476 | 0.5549 | 0.5622 | 0.5702 | 0.5783 | 0.5842 | 0.5893 | 0.5944 | 0.5995 | 0.6049 | 0.6102 | 0.6163 | 0.6227 | 0.6295 | 0.6359 | 0.6425 | 0.6485 | 0.6544 | 0.6607 | 0.6671 | 0.6735 | 0.6797 | 0.6852 |        |        |        |
| Peru                             | 0.4702 | 0.4792 | 0.4880 | 0.4959 | 0.5035 | 0.5106 | 0.5181 | 0.5260 | 0.5328 | 0.5371 | 0.5410 | 0.5449 | 0.5488 | 0.5534 | 0.5594 | 0.5663 | 0.5731 | 0.5806 | 0.5875 | 0.5942 | 0.6007 | 0.6066 | 0.6126 | 0.6185 | 0.6246 | 0.6311 | 0.6384 | 0.6461 | 0.6543 | 0.6614 | 0.6690 | 0.6768 | 0.6844 | 0.6918 | 0.6987 | 0.7059 |        |        |
| Central Latin America            | 0.4575 | 0.4682 | 0.4778 | 0.4865 | 0.4949 | 0.5029 | 0.5106 | 0.5180 | 0.5250 | 0.5318 | 0.5387 | 0.5457 | 0.5530 | 0.5610 | 0.5673 | 0.5738 | 0.5802 | 0.5869 | 0.5934 | 0.5992 | 0.6060 | 0.6126 | 0.6176 | 0.6230 | 0.6288 | 0.6349 | 0.6416 | 0.6484 | 0.6550 | 0.6616 | 0.6682 | 0.6748 | 0.6814 | 0.6884 | 0.6938 |        |        |        |
| Columbia                         | 0.4681 | 0.4766 | 0.4849 | 0.4929 | 0.5007 | 0.5083 | 0.5160 | 0.5234 | 0.5305 | 0.5374 | 0.5442 | 0.5510 | 0.5578 | 0.5647 | 0.5718 | 0.5791 | 0.5860 | 0.5927 | 0.5988 | 0.6060 | 0.6088 | 0.6136 | 0.6183 | 0.6231 | 0.6282 | 0.6339 | 0.6402 | 0.6471 | 0.6542 | 0.6608 | 0.6673 | 0.6742 | 0.6809 | 0.6874 | 0.6938 |        |        |        |
| Costa Rica                       | 0.5156 | 0.5205 | 0.5249 | 0.5295 | 0.5345 | 0.5396 | 0.5447 | 0.5499 | 0.5553 | 0.5607 | 0.5661 | 0.5714 | 0.5770 | 0.5823 | 0.5874 | 0.5924 | 0.5974 | 0.6027 | 0.6081 | 0.6136 | 0.6192 | 0.6249 | 0.6307 | 0.6365 | 0.6422 | 0.6481 | 0.6540 | 0.6600 | 0.6663 | 0.6727 | 0.6792 | 0.6858 | 0.6926 | 0.6992 | 0.7056 | 0.7117 |        |        |
| El Salvador                      | 0.3718 | 0.3824 | 0.3882 | 0.3939 | 0.3995 | 0.4050 | 0.4109 | 0.4168 | 0.4228 | 0.4288 | 0.4353 | 0.4424 | 0.4502 | 0.4585 | 0.4671 | 0.4759 | 0.4843 | 0.4929 | 0.5016 | 0.5102 | 0.5186 | 0.5269 | 0.5349 | 0.5425 | 0.5499 | 0.5572 | 0.5646 | 0.5721 | 0.5791 | 0.5852 | 0.5910 | 0.5969 | 0.6026 | 0.6082 | 0.6135 |        |        |        |
| Guatemala                        | 0.3175 | 0.3167 | 0.3218 | 0.3274 | 0.3333 | 0.3394 | 0.3462 | 0.3510 | 0.3568 | 0.3625 | 0.3680 | 0.3739 | 0.3798 | 0.3855 | 0.3924 | 0.3993 | 0.4063 | 0.4136 | 0.4212 | 0.4289 | 0.4366 | 0.4443 | 0.4521 | 0.4597 | 0.4671 | 0.4745 | 0.4820 | 0.4896 | 0.4969 | 0.5038 | 0.5104 | 0.5170 | 0.5235 | 0.5299 | 0.5363 |        |        |        |
| Honduras                         | 0.3092 | 0.3170 | 0.3247 | 0.3321 | 0.3395 | 0.3468 | 0.3535 | 0.3602 | 0.3669 | 0.3736 | 0.3800 | 0.3863 | 0.3930 | 0.4001 | 0.4068 | 0.4140 | 0.4210 | 0.4285 | 0.4362 | 0.4433 | 0.4511 | 0.4590 | 0.4670 | 0.4751 | 0.4834 | 0.4921 | 0.5012 | 0.5104 | 0.5199 | 0.5273 | 0.5350 | 0.5424 | 0.5495 | 0.5565 | 0.5625 |        |        |        |
| Mexico                           | 0.6661 | 0.6800 | 0.6921 | 0.7027 | 0.7127 | 0.7222 | 0.7316 | 0.7405 | 0.7489 | 0.7567 | 0.7640 | 0.7707 | 0.7769 | 0.7825 | 0.7876 | 0.7921 | 0.7960 | 0.7999 | 0.8043 | 0.8092 | 0.8141 | 0.8190 | 0.8239 | 0.8288 | 0.8337 | 0.8386 | 0.8435 | 0.8484 | 0.8533 | 0.8582 | 0.8631 | 0.8680 | 0.8729 | 0.8778 | 0.8827 | 0.8876 |        |        |
| Apaculco                         | 0.4688 | 0.4695 | 0.4712 | 0.4722 | 0.4736 | 0.4752 | 0.4769 | 0.4787 | 0.4806 | 0.4825 | 0.4844 | 0.4863 | 0.4882 | 0.4901 | 0.4920 | 0.4940 | 0.4960 | 0.4980 | 0.5000 | 0.5020 | 0.5040 | 0.5060 | 0.5080 | 0.5100 | 0.5120 | 0.5140 | 0.5160 | 0.5180 | 0.5200 | 0.5220 | 0.5240 | 0.5260 | 0.5280 | 0.5300 | 0.5320 | 0.5340 |        |        |
| Baja California                  | 0.5383 | 0.5522 | 0.5643 | 0.5748 | 0.5846 | 0.5929 | 0.5992 | 0.6051 | 0.6105 | 0.6160 | 0.6217 | 0.6276 | 0.6333 | 0.6390 | 0.6449 | 0.6519 | 0.6579 | 0.6649 | 0.6721 | 0.6793 | 0.6862 | 0.6931 | 0.7004 | 0.7073 | 0.7141 | 0.7209 | 0.7282 | 0.7352 | 0.7418 | 0.7472 | 0.7528 | 0.7586 | 0.7645 | 0.7702 | 0.7758 |        |        |        |
| Higo California Sur              | 0.5165 | 0.5329 | 0.5473 | 0.5599 | 0.5717 | 0.5827 | 0.5929 | 0.6025 | 0.6116 | 0.6204 | 0.6288 | 0.6368 | 0.6446 | 0.6522 | 0.6600 | 0.6678 | 0.6754 | 0.6829 | 0.6899 | 0.6971 | 0.7050 | 0.7128 | 0.7204 | 0.7279 | 0.7351 | 0.7429 | 0.7511 | 0.7574 | 0.7649 | 0.7724 | 0.7800 | 0.7876 | 0.7953 | 0.8031 |        |        |        |        |
| Campeche                         | 0.4470 | 0.4607 | 0.4726 | 0.4829 | 0.4926 | 0.5029 | 0.5123 | 0.5219 | 0.5311 | 0.5399 | 0.5482 | 0.5568 | 0.5645 | 0.5720 | 0.5794 | 0.5855 | 0.5913 | 0.5970 | 0.6029 | 0.6085 | 0.6150 | 0.6222 | 0.6295 | 0.6363 | 0.6432 | 0.6499 | 0.6571 | 0.6642 | 0.6715 | 0.6804 | 0.6856 | 0.6910 | 0.6960 | 0.7010 |        |        |        |        |
| Chiapas                          | 0.3174 | 0.3315 | 0.3437 | 0.3543 | 0.3643 | 0.3742 | 0.3832 | 0.3922 | 0.4014 | 0.4101 | 0.4182 | 0.4250 | 0.4317 | 0.4382 | 0.4441 | 0.4511 | 0.4582 | 0.4654 | 0.4726 | 0.4801 | 0.4878 | 0.4948 | 0.5011 | 0.5083 | 0.5149 | 0.     |        |        |        |        |        |        |        |        |        |        |        |        |

Appendix Table 5. Socio-Demographic Index values for all estimated GBD 2015 locations, 1980-2015

| Location                     | 1980   | 1981   | 1982   | 1983   | 1984   | 1985   | 1986   | 1987   | 1988   | 1989   | 1990   | 1991   | 1992   | 1993   | 1994   | 1995   | 1996   | 1997   | 1998   | 1999   | 2000   | 2001   | 2002   | 2003   | 2004   | 2005   | 2006   | 2007   | 2008   | 2009   | 2010   | 2011   | 2012   | 2013   | 2014   | 2015   |        |        |
|------------------------------|--------|--------|--------|--------|--------|--------|--------|--------|--------|--------|--------|--------|--------|--------|--------|--------|--------|--------|--------|--------|--------|--------|--------|--------|--------|--------|--------|--------|--------|--------|--------|--------|--------|--------|--------|--------|--------|--------|
| North Africa and Middle East | 0.3300 | 0.3378 | 0.3462 | 0.3550 | 0.3641 | 0.3737 | 0.3829 | 0.3924 | 0.4023 | 0.4124 | 0.4225 | 0.4325 | 0.4421 | 0.4514 | 0.4602 | 0.4689 | 0.4779 | 0.4868 | 0.4956 | 0.5040 | 0.5121 | 0.5195 | 0.5268 | 0.5337 | 0.5408 | 0.5479 | 0.5550 | 0.5620 | 0.5688 | 0.5745 | 0.5803 | 0.5858 | 0.5908 | 0.5956 | 0.6001 | 0.6045 |        |        |
| North Africa and Middle East | 0.3300 | 0.3378 | 0.3462 | 0.3550 | 0.3641 | 0.3737 | 0.3829 | 0.3924 | 0.4023 | 0.4124 | 0.4225 | 0.4325 | 0.4421 | 0.4514 | 0.4602 | 0.4689 | 0.4779 | 0.4868 | 0.4956 | 0.5040 | 0.5121 | 0.5195 | 0.5268 | 0.5337 | 0.5408 | 0.5479 | 0.5550 | 0.5620 | 0.5688 | 0.5745 | 0.5803 | 0.5858 | 0.5908 | 0.5956 | 0.6001 | 0.6045 |        |        |
| Algeria                      | 0.1291 | 0.1314 | 0.1336 | 0.1355 | 0.1371 | 0.1387 | 0.1402 | 0.1415 | 0.1427 | 0.1439 | 0.1450 | 0.1461 | 0.1473 | 0.1484 | 0.1495 | 0.1506 | 0.1516 | 0.1526 | 0.1536 | 0.1546 | 0.1556 | 0.1565 | 0.1574 | 0.1583 | 0.1592 | 0.1601 | 0.1610 | 0.1619 | 0.1628 | 0.1637 | 0.1646 | 0.1655 | 0.1664 | 0.1673 | 0.1682 | 0.1691 | 0.1700 |        |
| Bahrain                      | 0.5173 | 0.5301 | 0.5435 | 0.5563 | 0.5694 | 0.5829 | 0.5967 | 0.6107 | 0.6248 | 0.6391 | 0.6534 | 0.6682 | 0.6832 | 0.6984 | 0.7137 | 0.7292 | 0.7448 | 0.7605 | 0.7763 | 0.7922 | 0.8082 | 0.8242 | 0.8403 | 0.8564 | 0.8726 | 0.8888 | 0.9050 | 0.9212 | 0.9374 | 0.9536 | 0.9698 | 0.9860 | 1.0022 | 1.0184 | 1.0346 | 1.0508 | 1.0670 |        |
| Egypt                        | 0.5059 | 0.5172 | 0.5287 | 0.5403 | 0.5520 | 0.5649 | 0.5788 | 0.5935 | 0.6089 | 0.6249 | 0.6415 | 0.6587 | 0.6764 | 0.6946 | 0.7129 | 0.7316 | 0.7506 | 0.7699 | 0.7894 | 0.8091 | 0.8289 | 0.8488 | 0.8688 | 0.8889 | 0.9091 | 0.9293 | 0.9495 | 0.9697 | 0.9899 | 1.0101 | 1.0303 | 1.0505 | 1.0707 | 1.0909 | 1.1111 | 1.1313 | 1.1515 |        |
| Iran                         | 0.3456 | 0.3485 | 0.3515 | 0.3546 | 0.3578 | 0.3610 | 0.3643 | 0.3676 | 0.3710 | 0.3744 | 0.3778 | 0.3812 | 0.3846 | 0.3880 | 0.3914 | 0.3948 | 0.3982 | 0.4016 | 0.4050 | 0.4084 | 0.4118 | 0.4152 | 0.4186 | 0.4220 | 0.4254 | 0.4288 | 0.4322 | 0.4356 | 0.4390 | 0.4424 | 0.4458 | 0.4492 | 0.4526 | 0.4560 | 0.4594 | 0.4628 | 0.4662 |        |
| Iraq                         | 0.3234 | 0.3327 | 0.3420 | 0.3507 | 0.3589 | 0.3668 | 0.3744 | 0.3819 | 0.3893 | 0.3967 | 0.4041 | 0.4115 | 0.4189 | 0.4263 | 0.4337 | 0.4411 | 0.4485 | 0.4559 | 0.4633 | 0.4707 | 0.4781 | 0.4855 | 0.4929 | 0.5003 | 0.5077 | 0.5151 | 0.5225 | 0.5299 | 0.5373 | 0.5447 | 0.5521 | 0.5595 | 0.5669 | 0.5743 | 0.5817 | 0.5891 | 0.5965 |        |
| Jordan                       | 0.3625 | 0.3818 | 0.4007 | 0.4194 | 0.4374 | 0.4551 | 0.4733 | 0.4916 | 0.5100 | 0.5284 | 0.5469 | 0.5654 | 0.5840 | 0.6026 | 0.6212 | 0.6398 | 0.6584 | 0.6770 | 0.6956 | 0.7142 | 0.7328 | 0.7514 | 0.7700 | 0.7886 | 0.8072 | 0.8258 | 0.8444 | 0.8630 | 0.8816 | 0.9002 | 0.9188 | 0.9374 | 0.9560 | 0.9746 | 0.9932 | 1.0118 | 1.0304 |        |
| Kuwait                       | 0.5254 | 0.5424 | 0.5599 | 0.5785 | 0.5979 | 0.6181 | 0.6386 | 0.6594 | 0.6804 | 0.7016 | 0.7230 | 0.7445 | 0.7661 | 0.7878 | 0.8095 | 0.8313 | 0.8531 | 0.8750 | 0.8969 | 0.9188 | 0.9407 | 0.9626 | 0.9845 | 1.0064 | 1.0283 | 1.0502 | 1.0721 | 1.0940 | 1.1159 | 1.1378 | 1.1597 | 1.1816 | 1.2035 | 1.2254 | 1.2473 | 1.2692 | 1.2911 |        |
| Lebanon                      | 0.5012 | 0.5084 | 0.5126 | 0.5184 | 0.5278 | 0.5394 | 0.5544 | 0.5696 | 0.5856 | 0.6017 | 0.6178 | 0.6339 | 0.6500 | 0.6661 | 0.6822 | 0.6983 | 0.7144 | 0.7305 | 0.7466 | 0.7627 | 0.7788 | 0.7949 | 0.8110 | 0.8271 | 0.8432 | 0.8593 | 0.8754 | 0.8915 | 0.9076 | 0.9237 | 0.9398 | 0.9559 | 0.9720 | 0.9881 | 1.0042 | 1.0203 | 1.0364 |        |
| Lithuania                    | 0.3584 | 0.3715 | 0.3843 | 0.3968 | 0.4098 | 0.4232 | 0.4370 | 0.4512 | 0.4658 | 0.4807 | 0.4959 | 0.5114 | 0.5271 | 0.5430 | 0.5590 | 0.5751 | 0.5912 | 0.6073 | 0.6234 | 0.6395 | 0.6556 | 0.6717 | 0.6878 | 0.7039 | 0.7200 | 0.7361 | 0.7522 | 0.7683 | 0.7844 | 0.8005 | 0.8166 | 0.8327 | 0.8488 | 0.8649 | 0.8810 | 0.8971 | 0.9132 |        |
| Morocco                      | 0.2522 | 0.2591 | 0.2669 | 0.2749 | 0.2831 | 0.2916 | 0.3005 | 0.3098 | 0.3190 | 0.3285 | 0.3384 | 0.3484 | 0.3587 | 0.3690 | 0.3794 | 0.3898 | 0.3998 | 0.4088 | 0.4182 | 0.4280 | 0.4378 | 0.4476 | 0.4574 | 0.4672 | 0.4770 | 0.4868 | 0.4966 | 0.5064 | 0.5162 | 0.5260 | 0.5358 | 0.5456 | 0.5554 | 0.5652 | 0.5750 | 0.5848 | 0.5946 |        |
| Palestine                    | 0.3528 | 0.3610 | 0.3696 | 0.3795 | 0.3884 | 0.3959 | 0.4023 | 0.4075 | 0.4123 | 0.4173 | 0.4229 | 0.4298 | 0.4374 | 0.4458 | 0.4548 | 0.4643 | 0.4743 | 0.4848 | 0.4958 | 0.5072 | 0.5190 | 0.5316 | 0.5450 | 0.5592 | 0.5742 | 0.5899 | 0.6064 | 0.6237 | 0.6418 | 0.6607 | 0.6804 | 0.7009 | 0.7222 | 0.7444 | 0.7675 | 0.7915 |        |        |
| Oman                         | 0.2905 | 0.2932 | 0.2995 | 0.3084 | 0.3186 | 0.3306 | 0.3421 | 0.3555 | 0.3716 | 0.3893 | 0.4089 | 0.4306 | 0.4537 | 0.4788 | 0.5065 | 0.5371 | 0.5706 | 0.6072 | 0.6470 | 0.6901 | 0.7366 | 0.7865 | 0.8394 | 0.8953 | 0.9542 | 1.0161 | 1.0810 | 1.1499 | 1.2228 | 1.3007 | 1.3826 | 1.4685 | 1.5584 | 1.6523 | 1.7502 | 1.8520 |        |        |
| Qatar                        | 0.4963 | 0.5077 | 0.5244 | 0.5375 | 0.5505 | 0.5630 | 0.5742 | 0.5842 | 0.5977 | 0.6078 | 0.6162 | 0.6233 | 0.6293 | 0.6343 | 0.6393 | 0.6443 | 0.6493 | 0.6543 | 0.6593 | 0.6643 | 0.6693 | 0.6743 | 0.6793 | 0.6843 | 0.6893 | 0.6943 | 0.6993 | 0.7043 | 0.7093 | 0.7143 | 0.7193 | 0.7243 | 0.7293 | 0.7343 | 0.7393 | 0.7443 | 0.7493 |        |
| Saudi Arabia                 | 0.4005 | 0.4179 | 0.4355 | 0.4522 | 0.4684 | 0.4832 | 0.4989 | 0.4985 | 0.5065 | 0.5149 | 0.5235 | 0.5333 | 0.5426 | 0.5524 | 0.5624 | 0.5726 | 0.5833 | 0.6034 | 0.6176 | 0.6308 | 0.6433 | 0.6539 | 0.6623 | 0.6716 | 0.6809 | 0.6901 | 0.6991 | 0.7077 | 0.7162 | 0.7249 | 0.7339 | 0.7428 | 0.7517 | 0.7607 | 0.7697 | 0.7787 | 0.7877 |        |
| 'Astr                        | 0.3632 | 0.3824 | 0.4015 | 0.4189 | 0.4355 | 0.4507 | 0.4658 | 0.4810 | 0.4962 | 0.5114 | 0.5266 | 0.5418 | 0.5570 | 0.5722 | 0.5874 | 0.6026 | 0.6178 | 0.6330 | 0.6482 | 0.6634 | 0.6786 | 0.6938 | 0.7090 | 0.7242 | 0.7394 | 0.7546 | 0.7698 | 0.7850 | 0.8002 | 0.8154 | 0.8306 | 0.8458 | 0.8610 | 0.8762 | 0.8914 | 0.9066 | 0.9218 |        |
| Bahar                        | 0.3956 | 0.4101 | 0.4240 | 0.4366 | 0.4486 | 0.4595 | 0.4664 | 0.4712 | 0.4760 | 0.4808 | 0.4856 | 0.4904 | 0.4952 | 0.5000 | 0.5048 | 0.5096 | 0.5144 | 0.5192 | 0.5240 | 0.5288 | 0.5336 | 0.5384 | 0.5432 | 0.5480 | 0.5528 | 0.5576 | 0.5624 | 0.5672 | 0.5720 | 0.5768 | 0.5816 | 0.5864 | 0.5912 | 0.5960 | 0.6008 | 0.6056 | 0.6104 |        |
| Eastern Province             | 0.4236 | 0.4407 | 0.4579 | 0.4743 | 0.4901 | 0.5045 | 0.5124 | 0.5207 | 0.5293 | 0.5383 | 0.5480 | 0.5586 | 0.5707 | 0.5832 | 0.5961 | 0.6094 | 0.6231 | 0.6372 | 0.6517 | 0.6664 | 0.6812 | 0.6961 | 0.7111 | 0.7261 | 0.7411 | 0.7561 | 0.7711 | 0.7861 | 0.8011 | 0.8161 | 0.8311 | 0.8461 | 0.8611 | 0.8761 | 0.8911 | 0.9061 | 0.9211 |        |
| Jaw                          | 0.4064 | 0.4227 | 0.4388 | 0.4535 | 0.4676 | 0.4806 | 0.4935 | 0.5064 | 0.5192 | 0.5320 | 0.5456 | 0.5592 | 0.5728 | 0.5864 | 0.5999 | 0.6134 | 0.6269 | 0.6404 | 0.6539 | 0.6674 | 0.6809 | 0.6944 | 0.7079 | 0.7214 | 0.7349 | 0.7484 | 0.7619 | 0.7754 | 0.7889 | 0.8024 | 0.8159 | 0.8294 | 0.8429 | 0.8564 | 0.8699 | 0.8834 | 0.8969 |        |
| Harit                        | 0.2983 | 0.3048 | 0.3108 | 0.3164 | 0.3216 | 0.3273 | 0.3335 | 0.3401 | 0.3470 | 0.3543 | 0.3620 | 0.3701 | 0.3786 | 0.3874 | 0.3966 | 0.4061 | 0.4159 | 0.4260 | 0.4364 | 0.4471 | 0.4581 | 0.4693 | 0.4807 | 0.4923 | 0.5041 | 0.5161 | 0.5283 | 0.5407 | 0.5532 | 0.5658 | 0.5785 | 0.5913 | 0.6041 | 0.6170 | 0.6299 | 0.6428 | 0.6557 |        |
| Iran                         | 0.3172 | 0.3320 | 0.3458 | 0.3590 | 0.3719 | 0.3836 | 0.3945 | 0.4047 | 0.4143 | 0.4234 | 0.4320 | 0.4401 | 0.4477 | 0.4548 | 0.4614 | 0.4675 | 0.4732 | 0.4785 | 0.4834 | 0.4879 | 0.4921 | 0.4960 | 0.5000 | 0.5040 | 0.5080 | 0.5120 | 0.5160 | 0.5200 | 0.5240 | 0.5280 | 0.5320 | 0.5360 | 0.5400 | 0.5440 | 0.5480 | 0.5520 | 0.5560 | 0.5600 |
| Iran                         | 0.3087 | 0.3317 | 0.3586 | 0.3832 | 0.4062 | 0.4269 | 0.4434 | 0.4561 | 0.4652 | 0.4722 | 0.4778 | 0.4820 | 0.4858 | 0.4892 | 0.4926 | 0.4956 | 0.4982 | 0.4998 | 0.5000 | 0.5000 | 0.5000 | 0.5000 | 0.5000 | 0.5000 | 0.5000 | 0.5000 | 0.5000 | 0.5000 | 0.5000 | 0.5000 | 0.5000 | 0.5000 | 0.5000 | 0.5000 | 0.5000 | 0.5000 | 0.5000 | 0.5000 |
| Malikah                      | 0.4182 | 0.4341 | 0.4500 | 0.4651 | 0.4802 | 0.4952 | 0.5102 | 0.5252 | 0.5402 | 0.5552 | 0.5702 | 0.5852 | 0.5999 | 0.6144 | 0.6288 | 0.6432 | 0.6576 | 0.6719 | 0.6861 | 0.6999 | 0.7136 | 0.7272 | 0.7408 | 0.7544 | 0.7680 | 0.7816 | 0.7952 | 0.8088 | 0.8224 | 0.8360 | 0.8496 | 0.8632 | 0.8768 | 0.8904 | 0.9040 | 0.9176 | 0.9312 |        |
| Najran                       | 0.2531 | 0.2835 | 0.3118 | 0.3362 | 0.3584 | 0.3770 | 0.3928 | 0.4068 | 0.4193 | 0.4305 | 0.4407 | 0.4500 | 0.4584 | 0.4659 | 0.4726 | 0.4786 | 0.4838 | 0.4882 | 0.4918 | 0.4946 | 0.4966 | 0.4978 | 0.4982 | 0.4986 | 0.4989 | 0.4991 | 0.4992 | 0.4993 | 0.4994 | 0.4995 | 0.4996 | 0.4997 | 0.4998 | 0.4999 | 0.5000 | 0.5000 | 0.5000 | 0.5000 |
| Northern Borders             | 0.4254 | 0.4370 | 0.4491 | 0.4609 | 0.4724 | 0.4828 | 0.4928 | 0.4998 | 0.5048 | 0.5084 | 0.5114 | 0.5140 | 0.5162 | 0.5180 | 0.5196 | 0.5210 | 0.5222 | 0.5232 | 0.5240 | 0.5246 | 0.5250 | 0.5254 | 0.5258 | 0.5262 | 0.5266 | 0.5270 | 0.5274 | 0.5278 | 0.5282 | 0.5286 | 0.5290 | 0.5294 | 0.5298 | 0.5302 | 0.5306 | 0.5    |        |        |

| Location              | Appendix Table 5. Socio-Demographic Index values for all estimated GBD 2015 locations, 1980-2015 |        |        |        |        |        |        |        |        |        |        |        |        |        |        |        |        |        |                                                                                                                                                                                                                                                                                        |        |        |        |        |        |        |        |        |        |        |        |        |        |        |        |        |        |        |
|-----------------------|--------------------------------------------------------------------------------------------------|--------|--------|--------|--------|--------|--------|--------|--------|--------|--------|--------|--------|--------|--------|--------|--------|--------|----------------------------------------------------------------------------------------------------------------------------------------------------------------------------------------------------------------------------------------------------------------------------------------|--------|--------|--------|--------|--------|--------|--------|--------|--------|--------|--------|--------|--------|--------|--------|--------|--------|--------|
|                       | 1980                                                                                             | 1981   | 1982   | 1983   | 1984   | 1985   | 1986   | 1987   | 1988   | 1989   | 1990   | 1991   | 1992   | 1993   | 1994   | 1995   | 1996   | 1997   | 1998                                                                                                                                                                                                                                                                                   | 1999   | 2000   | 2001   | 2002   | 2003   | 2004   | 2005   | 2006   | 2007   | 2008   | 2009   | 2010   | 2011   | 2012   | 2013   | 2014   | 2015   |        |
| Mali's Akshira, Rural | 0.2599                                                                                           | 0.2557 | 0.2605 | 0.2657 | 0.2710 | 0.2770 | 0.2833 | 0.2905 | 0.2986 | 0.3074 | 0.3172 | 0.3277 | 0.3392 | 0.3483 | 0.3586 | 0.3699 | 0.3809 | 0.3911 | 0.4008 <td>0.4113</td> <td>0.4209</td> <td>0.4306</td> <td>0.4405</td> <td>0.4504</td> <td>0.4607</td> <td>0.4715</td> <td>0.4825</td> <td>0.4938</td> <td>0.5038</td> <td>0.5134</td> <td>0.5233</td> <td>0.5333</td> <td>0.5401</td> <td>0.5472</td> <td>0.5540</td> <td>0.5605</td> | 0.4113 | 0.4209 | 0.4306 | 0.4405 | 0.4504 | 0.4607 | 0.4715 | 0.4825 | 0.4938 | 0.5038 | 0.5134 | 0.5233 | 0.5333 | 0.5401 | 0.5472 | 0.5540 | 0.5605 |        |
| Mali's Akshira, Urban | 0.4320                                                                                           | 0.4367 | 0.4411 | 0.4459 | 0.4505 | 0.4559 | 0.4611 | 0.4674 | 0.4746 | 0.4835 | 0.4919 | 0.4990 | 0.5072 | 0.5157 | 0.5235 | 0.5323 | 0.5406 | 0.5479 | 0.5546                                                                                                                                                                                                                                                                                 | 0.5622 | 0.5688 | 0.5755 | 0.5823 | 0.5893 | 0.5969 | 0.6055 | 0.6147 | 0.6247 | 0.6339 | 0.6434 | 0.6538 | 0.6640 | 0.6735 | 0.6829 | 0.6928 | 0.7027 |        |
| Manipur               | 0.4974                                                                                           | 0.3036 | 0.3091 | 0.3157 | 0.3229 | 0.3307 | 0.3384 | 0.3586 | 0.3674 | 0.3758 | 0.3841 | 0.3928 | 0.4016 | 0.4145 | 0.4221 | 0.4300 | 0.4384 | 0.4470 | 0.4556                                                                                                                                                                                                                                                                                 | 0.4642 | 0.4729 | 0.4816 | 0.4904 | 0.4992 | 0.5081 | 0.5170 | 0.5260 | 0.5350 | 0.5440 | 0.5530 | 0.5620 | 0.5710 | 0.5800 | 0.5890 | 0.5980 | 0.6070 |        |
| Manipur, Rural        | 0.2835                                                                                           | 0.2892 | 0.2942 | 0.3002 | 0.3068 | 0.3130 | 0.3205 | 0.3305 | 0.3401 | 0.3484 | 0.3564 | 0.3643 | 0.3719 | 0.3800 | 0.3874 | 0.3947 | 0.4025 | 0.4105 | 0.4191                                                                                                                                                                                                                                                                                 | 0.4283 | 0.4375 | 0.4466 | 0.4556 | 0.4646 | 0.4729 | 0.4814 | 0.4902 | 0.4989 | 0.5078 | 0.5166 | 0.5254 | 0.5342 | 0.5430 | 0.5518 | 0.5606 | 0.5694 |        |
| Manipur, Urban        | 0.3634                                                                                           | 0.3692 | 0.3742 | 0.3801 | 0.3865 | 0.3925 | 0.3995 | 0.4091 | 0.4182 | 0.4258 | 0.4334 | 0.4404 | 0.4474 | 0.4549 | 0.4626 | 0.4698 | 0.4758 | 0.4835 | 0.4914                                                                                                                                                                                                                                                                                 | 0.5003 | 0.5094 | 0.5184 | 0.5274 | 0.5364 | 0.5454 | 0.5544 | 0.5634 | 0.5724 | 0.5814 | 0.5904 | 0.5994 | 0.6084 | 0.6174 | 0.6264 | 0.6354 | 0.6444 |        |
| Madagascar            | 0.2307                                                                                           | 0.2341 | 0.2376 | 0.2416 | 0.2460 | 0.2516 | 0.2577 | 0.2648 | 0.2715 | 0.2807 | 0.2897 | 0.2979 | 0.3052 | 0.3133 | 0.3205 | 0.3286 | 0.3363 | 0.3453 | 0.3541                                                                                                                                                                                                                                                                                 | 0.3634 | 0.3733 | 0.3832 | 0.3931 | 0.3998 | 0.4078 | 0.4161 | 0.4243 | 0.4324 | 0.4403 | 0.4483 | 0.4563 | 0.4643 | 0.4724 | 0.4804 | 0.4884 | 0.4965 |        |
| Madagascar, Rural     | 0.2808                                                                                           | 0.2836 | 0.2866 | 0.2910 | 0.2412 | 0.2149 | 0.2244 | 0.2309 | 0.2371 | 0.2456 | 0.2542 | 0.2627 | 0.2688 | 0.2766 | 0.2836 | 0.2918 | 0.2994 | 0.3077 | 0.3162                                                                                                                                                                                                                                                                                 | 0.3253 | 0.3348 | 0.3453 | 0.3562 | 0.3691 | 0.3771 | 0.3851 | 0.3930 | 0.4005 | 0.4084 | 0.4154 | 0.4234 | 0.4276 | 0.4327 | 0.4387 | 0.4444 |        |        |
| Madagascar, Urban     | 0.2409                                                                                           | 0.1892 | 0.1935 | 0.1983 | 0.4049 | 0.4142 | 0.4112 | 0.4111 | 0.4507 | 0.4588 | 0.4662 | 0.4742 | 0.4810 | 0.4899 | 0.4966 | 0.5048 | 0.5133 | 0.5253 | 0.5318                                                                                                                                                                                                                                                                                 | 0.5415 | 0.5495 | 0.5572 | 0.5651 | 0.5731 | 0.5811 | 0.6000 | 0.6086 | 0.6169 | 0.6250 | 0.6329 | 0.6414 | 0.6466 | 0.6566 | 0.6670 | 0.6766 | 0.6856 |        |
| Micronesia            | 0.2889                                                                                           | 0.2902 | 0.2938 | 0.2989 | 0.3032 | 0.3195 | 0.3255 | 0.3479 | 0.3585 | 0.3674 | 0.3746 | 0.3835 | 0.3918 | 0.4007 | 0.4071 | 0.4154 | 0.4258 | 0.4328 | 0.4392                                                                                                                                                                                                                                                                                 | 0.4466 | 0.4556 | 0.4641 | 0.4723 | 0.4793 | 0.4856 | 0.4914 | 0.4968 | 0.5027 | 0.5088 | 0.5144 | 0.5245 | 0.5345 | 0.5445 | 0.5545 | 0.5645 | 0.5745 |        |
| Micronesia, Rural     | 0.2360                                                                                           | 0.2405 | 0.2431 | 0.2477 | 0.2553 | 0.2670 | 0.2792 | 0.2939 | 0.3100 | 0.3122 | 0.3190 | 0.3274 | 0.3353 | 0.3437 | 0.3498 | 0.3578 | 0.3678 | 0.3786 | 0.3888                                                                                                                                                                                                                                                                                 | 0.4000 | 0.4127 | 0.4192 | 0.4250 | 0.4302 | 0.4354 | 0.4403 | 0.4455 | 0.4522 | 0.4591 | 0.4656 | 0.4714 | 0.4775 | 0.4846 | 0.4916 | 0.4982 |        |        |
| Micronesia, Urban     | 0.3512                                                                                           | 0.3548 | 0.3587 | 0.3640 | 0.3724 | 0.3849 | 0.3980 | 0.4137 | 0.4244 | 0.4331 | 0.4401 | 0.4488 | 0.4568 | 0.4653 | 0.4712 | 0.4791 | 0.4891 | 0.4954 | 0.5011                                                                                                                                                                                                                                                                                 | 0.5080 | 0.5165 | 0.5245 | 0.5325 | 0.5392 | 0.5453 | 0.5511 | 0.5564 | 0.5625 | 0.5686 | 0.5746 | 0.5851 | 0.5927 | 0.6012 | 0.6097 | 0.6193 | 0.6290 |        |
| NA gLand              | 0.3069                                                                                           | 0.3125 | 0.3196 | 0.3267 | 0.3344 | 0.3416 | 0.3489 | 0.3585 | 0.3687 | 0.3783 | 0.3879 | 0.3985 | 0.4088 | 0.4199 | 0.4257 | 0.4351 | 0.4439 | 0.4527 | 0.4587                                                                                                                                                                                                                                                                                 | 0.4647 | 0.4734 | 0.4825 | 0.4916 | 0.4994 | 0.5074 | 0.5151 | 0.5222 | 0.5312 | 0.5405 | 0.5496 | 0.5576 | 0.5657 | 0.5750 | 0.5829 | 0.5907 | 0.5980 |        |
| NA gLand, Rural       | 0.2973                                                                                           | 0.3024 | 0.3092 | 0.3158 | 0.3230 | 0.3298 | 0.3367 | 0.3459 | 0.3556 | 0.3648 | 0.3741 | 0.3824 | 0.3966 | 0.4051 | 0.4113 | 0.4207 | 0.4295 | 0.4383 | 0.4443                                                                                                                                                                                                                                                                                 | 0.4499 | 0.4588 | 0.4673 | 0.4760 | 0.4830 | 0.4900 | 0.4965 | 0.5022 | 0.5098 | 0.5174 | 0.5244 | 0.5308 | 0.5382 | 0.5446 | 0.5507 | 0.5574 | 0.5644 |        |
| NA gLand, Urban       | 0.3805                                                                                           | 0.3865 | 0.3941 | 0.4014 | 0.4091 | 0.4162 | 0.4234 | 0.4327 | 0.4425 | 0.4517 | 0.4609 | 0.4690 | 0.4763 | 0.4835 | 0.4905 | 0.4974 | 0.5043 | 0.5115 | 0.5271                                                                                                                                                                                                                                                                                 | 0.5371 | 0.5450 | 0.5497 | 0.5589 | 0.5667 | 0.5750 | 0.5830 | 0.5906 | 0.6004 | 0.6104 | 0.6204 | 0.6293 | 0.6396 | 0.6490 | 0.6583 | 0.6682 | 0.6786 |        |
| Orissa                | 0.2042                                                                                           | 0.2086 | 0.2127 | 0.2192 | 0.2242 | 0.2308 | 0.2377 | 0.2435 | 0.2516 | 0.2604 | 0.2688 | 0.2747 | 0.2820 | 0.2899 | 0.2988 | 0.3093 | 0.3170 | 0.3263 | 0.3367                                                                                                                                                                                                                                                                                 | 0.3480 | 0.3579 | 0.3676 | 0.3763 | 0.3873 | 0.3989 | 0.4095 | 0.4224 | 0.4368 | 0.4493 | 0.4603 | 0.4720 | 0.4819 | 0.4916 | 0.5005 | 0.5088 | 0.5167 |        |
| Orissa, Rural         | 0.1857                                                                                           | 0.1897 | 0.1934 | 0.1994 | 0.2039 | 0.2100 | 0.2146 | 0.2217 | 0.2292 | 0.2375 | 0.2434 | 0.2509 | 0.2578 | 0.2653 | 0.2738 | 0.2803 | 0.2916 | 0.3007 | 0.3111                                                                                                                                                                                                                                                                                 | 0.3220 | 0.3324 | 0.3423 | 0.3512 | 0.3623 | 0.3742 | 0.3849 | 0.3978 | 0.4108 | 0.4242 | 0.4403 | 0.4459 | 0.4533 | 0.4646 | 0.4731 | 0.4813 | 0.4889 |        |
| Orissa, Urban         | 0.3645                                                                                           | 0.3690 | 0.3731 | 0.3797 | 0.3844 | 0.3908 | 0.3973 | 0.4023 | 0.4098 | 0.4179 | 0.4233 | 0.4302 | 0.4364 | 0.4432 | 0.4510 | 0.4604 | 0.4668 | 0.4748 | 0.4840                                                                                                                                                                                                                                                                                 | 0.4940 | 0.5027 | 0.5110 | 0.5183 | 0.5279 | 0.5384 | 0.5477 | 0.5595 | 0.5729 | 0.5845 | 0.5947 | 0.6059 | 0.6156 | 0.6255 | 0.6350 | 0.6447 | 0.6542 |        |
| Punjab                | 0.3218                                                                                           | 0.3285 | 0.3355 | 0.3425 | 0.3502 | 0.3584 | 0.3668 | 0.3763 | 0.3861 | 0.3970 | 0.4073 | 0.4175 | 0.4279 | 0.4382 | 0.4481 | 0.4581 | 0.4682 | 0.4779 | 0.4873                                                                                                                                                                                                                                                                                 | 0.4970 | 0.5075 | 0.5170 | 0.5257 | 0.5341 | 0.5420 | 0.5505 | 0.5592 | 0.5679 | 0.5788 | 0.5886 | 0.5981 | 0.6074 | 0.6160 | 0.6241 | 0.6319 | 0.6397 |        |
| Punjab, Rural         | 0.2883                                                                                           | 0.2947 | 0.3015 | 0.3083 | 0.3158 | 0.3239 | 0.3322 | 0.3416 | 0.3512 | 0.3621 | 0.3723 | 0.3823 | 0.3926 | 0.4025 | 0.4123 | 0.4221 | 0.4321 | 0.4419 | 0.4515                                                                                                                                                                                                                                                                                 | 0.4617 | 0.4724 | 0.4826 | 0.4918 | 0.5010 | 0.5096 | 0.5188 | 0.5278 | 0.5379 | 0.5476 | 0.5570 | 0.5660 | 0.5757 | 0.5826 | 0.5901 | 0.6039 |        |        |
| Punjab, Urban         | 0.4122                                                                                           | 0.4215 | 0.4301 | 0.4345 | 0.4415 | 0.4490 | 0.4566 | 0.4651 | 0.4739 | 0.4830 | 0.4939 | 0.5019 | 0.5196 | 0.5278 | 0.5361 | 0.5444 | 0.5523 | 0.5599 | 0.5682                                                                                                                                                                                                                                                                                 | 0.5767 | 0.5856 | 0.5944 | 0.5981 | 0.6044 | 0.6118 | 0.6185 | 0.6271 | 0.6357 | 0.6445 | 0.6533 | 0.6625 | 0.6714 | 0.6804 | 0.6898 | 0.6994 | 0.7091 |        |
| Rajasthan             | 0.1817                                                                                           | 0.1862 | 0.1912 | 0.1981 | 0.2035 | 0.2092 | 0.2156 | 0.2219 | 0.2312 | 0.2400 | 0.2511 | 0.2604 | 0.2703 | 0.2795 | 0.2906 | 0.3014 | 0.3131 | 0.3237 | 0.3337                                                                                                                                                                                                                                                                                 | 0.3454 | 0.3558 | 0.3669 | 0.3760 | 0.3876 | 0.3985 | 0.4091 | 0.4211 | 0.4333 | 0.4451 | 0.4560 | 0.4695 | 0.4827 | 0.4943 | 0.5066 | 0.5140 | 0.5226 |        |
| Rajasthan, Rural      | 0.2323                                                                                           | 0.2336 | 0.2395 | 0.2474 | 0.2537 | 0.2600 | 0.2672 | 0.2740 | 0.2841 | 0.2944 | 0.3051 | 0.3149 | 0.3252 | 0.3348 | 0.3463 | 0.3575 | 0.3697 | 0.3808 | 0.3908                                                                                                                                                                                                                                                                                 | 0.4028 | 0.4132 | 0.4237 | 0.4349 | 0.4461 | 0.4571 | 0.4681 | 0.4791 | 0.4902 | 0.5014 | 0.5126 | 0.5238 | 0.5350 | 0.5462 | 0.5574 | 0.5686 | 0.5800 |        |
| Rajasthan, Urban      | 0.2633                                                                                           | 0.2674 | 0.2727 | 0.2784 | 0.2866 | 0.2959 | 0.3065 | 0.3149 | 0.3244 | 0.3353 | 0.3440 | 0.3511 | 0.3567 | 0.3645 | 0.3735 | 0.3818 | 0.3908 | 0.4001 | 0.4094                                                                                                                                                                                                                                                                                 | 0.4184 | 0.4284 | 0.4384 | 0.4487 | 0.4589 | 0.4691 | 0.4792 | 0.4890 | 0.4988 | 0.5091 | 0.5191 | 0.5294 | 0.5405 | 0.5517 | 0.5628 | 0.5741 | 0.5854 |        |
| Sikkim                | 0.2537                                                                                           | 0.2577 | 0.2627 | 0.2681 | 0.2760 | 0.2850 | 0.2946 | 0.3233 | 0.3340 | 0.3385 | 0.3438 | 0.3522 | 0.3600 | 0.3698 | 0.3855 | 0.3944 | 0.4030 | 0.4124 | 0.4214                                                                                                                                                                                                                                                                                 | 0.4313 | 0.4406 | 0.4498 | 0.4582 | 0.4672 | 0.4756 | 0.4844 | 0.5045 | 0.5210 | 0.5355 | 0.5479 | 0.5597 | 0.5690 | 0.5791 | 0.5901 | 0.6025 | 0.6155 |        |
| Sikkim, Rural         | 0.2666                                                                                           | 0.2713 | 0.2771 | 0.2832 | 0.3020 | 0.4020 | 0.4134 | 0.4245 | 0.4345 | 0.4437 | 0.4525 | 0.4596 | 0.4648 | 0.4734 | 0.4813 | 0.4893 | 0.4981 | 0.5072 | 0.5162                                                                                                                                                                                                                                                                                 | 0.5249 | 0.5346 | 0.5442 | 0.5540 | 0.5636 | 0.5733 | 0.5829 | 0.5921 | 0.6015 | 0.6116 | 0.6248 | 0.6343 | 0.6472 | 0.6582 | 0.6704 | 0.6827 | 0.6951 |        |
| Tamil N&du            | 0.2800                                                                                           | 0.2857 | 0.2903 | 0.2957 | 0.3032 | 0.3102 | 0.3178 | 0.3283 | 0.3378 | 0.3483 | 0.3587 | 0.3688 | 0.3794 | 0.3915 | 0.4037 | 0.4157 | 0.4276 | 0.4395 | 0.4525                                                                                                                                                                                                                                                                                 | 0.4657 | 0.4769 | 0.4882 | 0.4994 | 0.5104 | 0.5220 | 0.5360 | 0.5466 | 0.5554 | 0.5682 | 0.5800 | 0.5911 | 0.6010 | 0.6107 | 0.6201 | 0.6290 | 0.6380 |        |
| Tamil N&du, Rural     | 0.2369                                                                                           | 0.2423 | 0.2467 | 0.2520 | 0.2589 | 0.2666 | 0.2751 | 0.2847 | 0.2943 | 0.3046 | 0.3144 | 0.3244 | 0.3345 | 0.3445 | 0.3545 | 0.3644 | 0.3744 | 0.3847 | 0.3957                                                                                                                                                                                                                                                                                 | 0.4024 | 0.4148 | 0.4276 | 0.4389 | 0.4495 | 0.4597 | 0.4705 | 0.4822 | 0.4939 | 0.5047 | 0.5140 | 0.5240 | 0.5354 | 0.5465 | 0.5546 | 0.5636 | 0.5725 | 0.5809 |
| Tamil N&du, Urban     | 0.3585                                                                                           | 0.3744 | 0.3761 | 0.3847 | 0.3918 | 0.3996 | 0.4081 | 0.4177 | 0.4293 | 0.4367 | 0.4460 | 0.4543 | 0.4625 | 0.4718 | 0.4810 | 0.4907 | 0.4988 | 0.5078 | 0.5184                                                                                                                                                                                                                                                                                 | 0.5287 | 0.5395 | 0.5487 | 0.5572 | 0.5654 | 0.5741 | 0.5839 | 0.5938 | 0.6029 | 0.6109 | 0.6207 | 0.6308 | 0.6408 | 0.6502 | 0.6721 | 0.6829 | 0.6929 |        |
| Telangana             | 0.2724                                                                                           | 0.2780 | 0.2833 | 0.2887 | 0.2942 | 0.2997 | 0.3054 | 0.3125 | 0.3199 | 0.3277 | 0.3360 | 0.3441 | 0.3526 | 0.3613 | 0.3705 | 0.3805 | 0.3909 | 0.4014 | 0.4121                                                                                                                                                                                                                                                                                 | 0.4231 | 0.4341 | 0.4441 | 0.4553 | 0.4658 | 0.4759 | 0.4866 | 0.4968 | 0.5068 | 0.5163 | 0.5278 |        |        |        |        |        |        |        |



Appendix Table 5. Socio-Demographic Index values for all estimated GBD 2015 locations, 1980-2015

| Location      | 1980   | 1981   | 1982   | 1983   | 1984   | 1985   | 1986   | 1987   | 1988   | 1989   | 1990   | 1991   | 1992   | 1993   | 1994   | 1995   | 1996   | 1997   | 1998   | 1999   | 2000   | 2001   | 2002   | 2003   | 2004   | 2005   | 2006   | 2007   | 2008   | 2009   | 2010   | 2011   | 2012   | 2013   | 2014   | 2015   |        |        |
|---------------|--------|--------|--------|--------|--------|--------|--------|--------|--------|--------|--------|--------|--------|--------|--------|--------|--------|--------|--------|--------|--------|--------|--------|--------|--------|--------|--------|--------|--------|--------|--------|--------|--------|--------|--------|--------|--------|--------|
| Mandera       | 0.1477 | 0.1511 | 0.1543 | 0.1572 | 0.1600 | 0.1628 | 0.1660 | 0.1694 | 0.1732 | 0.1773 | 0.1817 | 0.1877 | 0.1888 | 0.1913 | 0.1936 | 0.1951 | 0.1958 | 0.1958 | 0.1956 | 0.1952 | 0.1949 | 0.1941 | 0.1929 | 0.1920 | 0.1919 | 0.1927 | 0.1940 | 0.1960 | 0.1978 | 0.2002 | 0.2028 | 0.2057 | 0.2087 | 0.2118 | 0.2151 | 0.2195 |        |        |
| Marabhi       | 0.1771 | 0.1805 | 0.1839 | 0.1870 | 0.1901 | 0.1932 | 0.1967 | 0.2003 | 0.2041 | 0.2076 | 0.2123 | 0.2166 | 0.2202 | 0.2232 | 0.2261 | 0.2285 | 0.2300 | 0.2309 | 0.2317 | 0.2322 | 0.2332 | 0.2342 | 0.2356 | 0.2375 | 0.2402 | 0.2434 | 0.2471 | 0.2516 | 0.2552 | 0.2588 | 0.2618 | 0.2654 | 0.2691 | 0.2729 | 0.2767 | 0.2814 |        |        |
| Meru          | 0.2487 | 0.2574 | 0.2660 | 0.2748 | 0.2834 | 0.2922 | 0.3015 | 0.3111 | 0.3213 | 0.3320 | 0.3440 | 0.3554 | 0.3660 | 0.3758 | 0.3846 | 0.3922 | 0.3977 | 0.4020 | 0.4052 | 0.4078 | 0.4108 | 0.4144 | 0.4171 | 0.4201 | 0.4236 | 0.4274 | 0.4314 | 0.4357 | 0.4404 | 0.4452 | 0.4504 | 0.4561 | 0.4623 | 0.4687 | 0.4757 | 0.4834 | 0.4918 |        |
| Mgeri         | 0.0898 | 0.1091 | 0.1407 | 0.1646 | 0.1852 | 0.2045 | 0.2226 | 0.2407 | 0.2583 | 0.2748 | 0.2912 | 0.3062 | 0.3199 | 0.3320 | 0.3426 | 0.3513 | 0.3569 | 0.3615 | 0.3663 | 0.3702 | 0.3732 | 0.3759 | 0.3781 | 0.3809 | 0.3839 | 0.3870 | 0.3902 | 0.3934 | 0.3970 | 0.4024 | 0.4081 | 0.4148 | 0.4224 | 0.4307 | 0.4389 | 0.4472 | 0.4555 | 0.4638 |
| Mombasa       | 0.3883 | 0.3875 | 0.3947 | 0.4017 | 0.4086 | 0.4158 | 0.4234 | 0.4314 | 0.4400 | 0.4490 | 0.4582 | 0.4677 | 0.4765 | 0.4838 | 0.4906 | 0.4964 | 0.5004 | 0.5035 | 0.5057 | 0.5077 | 0.5102 | 0.5121 | 0.5145 | 0.5169 | 0.5193 | 0.5216 | 0.5238 | 0.5259 | 0.5278 | 0.5295 | 0.5311 | 0.5326 | 0.5340 | 0.5354 | 0.5368 | 0.5381 | 0.5393 | 0.5405 |
| Mozambique    | 0.2624 | 0.2793 | 0.2783 | 0.2862 | 0.2942 | 0.3026 | 0.3115 | 0.3209 | 0.3312 | 0.3421 | 0.3531 | 0.3644 | 0.3758 | 0.3876 | 0.3998 | 0.4124 | 0.4250 | 0.4377 | 0.4503 | 0.4629 | 0.4754 | 0.4879 | 0.5003 | 0.5126 | 0.5248 | 0.5369 | 0.5489 | 0.5608 | 0.5726 | 0.5843 | 0.5959 | 0.6074 | 0.6188 | 0.6300 | 0.6411 | 0.6520 | 0.6628 | 0.6734 |
| Nairobi       | 0.3892 | 0.4039 | 0.4185 | 0.4329 | 0.4472 | 0.4615 | 0.4759 | 0.4905 | 0.5050 | 0.5193 | 0.5342 | 0.5493 | 0.5648 | 0.5803 | 0.5961 | 0.6120 | 0.6279 | 0.6439 | 0.6600 | 0.6761 | 0.6921 | 0.7081 | 0.7240 | 0.7399 | 0.7557 | 0.7715 | 0.7873 | 0.8030 | 0.8187 | 0.8343 | 0.8500 | 0.8656 | 0.8812 | 0.8968 | 0.9124 | 0.9279 | 0.9434 | 0.9589 |
| Nakuru        | 0.2841 | 0.3035 | 0.3129 | 0.3224 | 0.3318 | 0.3418 | 0.3521 | 0.3629 | 0.3741 | 0.3851 | 0.3964 | 0.4072 | 0.4171 | 0.4261 | 0.4345 | 0.4416 | 0.4477 | 0.4528 | 0.4578 | 0.4628 | 0.4677 | 0.4725 | 0.4772 | 0.4819 | 0.4865 | 0.4910 | 0.4954 | 0.5000 | 0.5046 | 0.5092 | 0.5138 | 0.5184 | 0.5230 | 0.5276 | 0.5322 | 0.5368 | 0.5414 | 0.5459 |
| Nandi         | 0.1993 | 0.2076 | 0.2159 | 0.2242 | 0.2326 | 0.2415 | 0.2509 | 0.2609 | 0.2716 | 0.2825 | 0.2938 | 0.3042 | 0.3139 | 0.3231 | 0.3319 | 0.3399 | 0.3466 | 0.3484 | 0.3514 | 0.3542 | 0.3575 | 0.3608 | 0.3638 | 0.3666 | 0.3695 | 0.3723 | 0.3756 | 0.3785 | 0.3810 | 0.3830 | 0.3846 | 0.3859 | 0.3870 | 0.3876 | 0.3881 | 0.3886 | 0.3891 | 0.3896 |
| Narek         | 0.1503 | 0.1587 | 0.1671 | 0.1753 | 0.1834 | 0.1919 | 0.2007 | 0.2100 | 0.2197 | 0.2291 | 0.2384 | 0.2474 | 0.2565 | 0.2650 | 0.2729 | 0.2804 | 0.2876 | 0.2945 | 0.3012 | 0.3077 | 0.3140 | 0.3201 | 0.3260 | 0.3318 | 0.3374 | 0.3429 | 0.3482 | 0.3533 | 0.3582 | 0.3629 | 0.3674 | 0.3718 | 0.3761 | 0.3802 | 0.3841 | 0.3878 | 0.3914 | 0.3948 |
| Nyamira       | 0.2612 | 0.2693 | 0.2773 | 0.2852 | 0.2930 | 0.3012 | 0.3099 | 0.3190 | 0.3284 | 0.3377 | 0.3476 | 0.3568 | 0.3651 | 0.3725 | 0.3795 | 0.3853 | 0.3894 | 0.3914 | 0.3925 | 0.3935 | 0.4005 | 0.4082 | 0.4167 | 0.4259 | 0.4342 | 0.4414 | 0.4476 | 0.4530 | 0.4576 | 0.4616 | 0.4650 | 0.4680 | 0.4708 | 0.4734 | 0.4757 | 0.4780 | 0.4801 | 0.4819 |
| Nyandarua     | 0.2608 | 0.2695 | 0.2782 | 0.2868 | 0.2955 | 0.3046 | 0.3141 | 0.3241 | 0.3345 | 0.3453 | 0.3578 | 0.3682 | 0.3774 | 0.3854 | 0.3928 | 0.3991 | 0.4035 | 0.4069 | 0.4101 | 0.4133 | 0.4160 | 0.4183 | 0.4210 | 0.4243 | 0.4281 | 0.4324 | 0.4371 | 0.4420 | 0.4469 | 0.4518 | 0.4567 | 0.4616 | 0.4665 | 0.4714 | 0.4763 | 0.4812 | 0.4861 | 0.4910 |
| Nyeri         | 0.2890 | 0.3000 | 0.3110 | 0.3219 | 0.3327 | 0.3437 | 0.3551 | 0.3668 | 0.3794 | 0.3930 | 0.4065 | 0.4191 | 0.4303 | 0.4401 | 0.4493 | 0.4573 | 0.4635 | 0.4686 | 0.4730 | 0.4770 | 0.4805 | 0.4839 | 0.4873 | 0.4910 | 0.4952 | 0.5000 | 0.5058 | 0.5126 | 0.5191 | 0.5255 | 0.5325 | 0.5399 | 0.5473 | 0.5547 | 0.5622 | 0.5694 | 0.5769 | 0.5844 |
| Samburu       | 0.1781 | 0.1842 | 0.1902 | 0.1961 | 0.2020 | 0.2081 | 0.2146 | 0.2213 | 0.2281 | 0.2341 | 0.2400 | 0.2455 | 0.2503 | 0.2544 | 0.2584 | 0.2626 | 0.2652 | 0.2665 | 0.2671 | 0.2672 | 0.2670 | 0.2671 | 0.2679 | 0.2691 | 0.2709 | 0.2732 | 0.2765 | 0.2798 | 0.2840 | 0.2890 | 0.2945 | 0.3000 | 0.3056 | 0.3113 | 0.3174 | 0.3240 | 0.3314 |        |
| Siaya         | 0.2090 | 0.2156 | 0.2223 | 0.2288 | 0.2353 | 0.2424 | 0.2499 | 0.2580 | 0.2669 | 0.2761 | 0.2861 | 0.2964 | 0.3066 | 0.3163 | 0.3250 | 0.3320 | 0.3370 | 0.3420 | 0.3468 | 0.3513 | 0.3567 | 0.3631 | 0.3707 | 0.3797 | 0.3894 | 0.3997 | 0.4102 | 0.4208 | 0.4314 | 0.4420 | 0.4526 | 0.4631 | 0.4736 | 0.4841 | 0.4946 | 0.5051 | 0.5156 |        |
| Taita Taveta  | 0.2894 | 0.2979 | 0.3064 | 0.3148 | 0.3232 | 0.3320 | 0.3413 | 0.3510 | 0.3612 | 0.3722 | 0.3834 | 0.3954 | 0.4083 | 0.4210 | 0.4340 | 0.4470 | 0.4600 | 0.4725 | 0.4848 | 0.4951 | 0.5033 | 0.5100 | 0.5152 | 0.5193 | 0.5224 | 0.5246 | 0.5259 | 0.5264 | 0.5264 | 0.5264 | 0.5264 | 0.5264 | 0.5264 | 0.5264 | 0.5264 | 0.5264 | 0.5264 | 0.5264 |
| Tana River    | 0.1967 | 0.2025 | 0.2085 | 0.2143 | 0.2202 | 0.2265 | 0.2332 | 0.2403 | 0.2478 | 0.2551 | 0.2631 | 0.2705 | 0.2771 | 0.2830 | 0.2884 | 0.2926 | 0.2952 | 0.2971 | 0.2984 | 0.2984 | 0.2970 | 0.2945 | 0.2927 | 0.2926 | 0.2933 | 0.2945 | 0.2961 | 0.2984 | 0.3009 | 0.3044 | 0.3087 | 0.3135 | 0.3184 | 0.3233 | 0.3287 | 0.3348 | 0.3419 |        |
| Tharaka Nithi | 0.3002 | 0.3063 | 0.3123 | 0.3182 | 0.3242 | 0.3304 | 0.3371 | 0.3442 | 0.3518 | 0.3592 | 0.3676 | 0.3756 | 0.3828 | 0.3893 | 0.3954 | 0.4007 | 0.4054 | 0.4073 | 0.4100 | 0.4121 | 0.4135 | 0.4148 | 0.4168 | 0.4202 | 0.4248 | 0.4301 | 0.4361 | 0.4431 | 0.4494 | 0.4548 | 0.4606 | 0.4669 | 0.4732 | 0.4797 | 0.4862 | 0.4930 | 0.5001 |        |
| Trans-Nzoia   | 0.2135 | 0.2225 | 0.2314 | 0.2401 | 0.2490 | 0.2584 | 0.2681 | 0.2786 | 0.2900 | 0.3022 | 0.3149 | 0.3286 | 0.3429 | 0.3580 | 0.3736 | 0.3893 | 0.4051 | 0.4210 | 0.4370 | 0.4530 | 0.4691 | 0.4852 | 0.5013 | 0.5174 | 0.5335 | 0.5496 | 0.5657 | 0.5818 | 0.5979 | 0.6139 | 0.6300 | 0.6461 | 0.6622 | 0.6783 | 0.6944 | 0.7105 | 0.7266 | 0.7427 |
| Turkana       | 0.0625 | 0.0644 | 0.0663 | 0.0681 | 0.0700 | 0.0718 | 0.0736 | 0.0759 | 0.0785 | 0.0827 | 0.0881 | 0.0949 | 0.1021 | 0.1095 | 0.1171 | 0.1249 | 0.1328 | 0.1408 | 0.1489 | 0.1570 | 0.1652 | 0.1734 | 0.1817 | 0.1900 | 0.1983 | 0.2066 | 0.2149 | 0.2232 | 0.2315 | 0.2398 | 0.2481 | 0.2564 | 0.2647 | 0.2730 | 0.2813 | 0.2896 | 0.2979 | 0.3062 |
| Uasin Gishu   | 0.2119 | 0.2510 | 0.2603 | 0.2695 | 0.2787 | 0.2884 | 0.2984 | 0.3089 | 0.3200 | 0.3311 | 0.3424 | 0.3539 | 0.3626 | 0.3711 | 0.3788 | 0.3852 | 0.3894 | 0.3931 | 0.3974 | 0.4021 | 0.4074 | 0.4127 | 0.4189 | 0.4251 | 0.4313 | 0.4375 | 0.4437 | 0.4500 | 0.4562 | 0.4624 | 0.4686 | 0.4748 | 0.4810 | 0.4872 | 0.4934 | 0.5000 | 0.5066 |        |
| Vihiga        | 0.2420 | 0.2526 | 0.2630 | 0.2732 | 0.2834 | 0.2936 | 0.3038 | 0.3140 | 0.3242 | 0.3344 | 0.3446 | 0.3548 | 0.3650 | 0.3752 | 0.3854 | 0.3956 | 0.4058 | 0.4160 | 0.4262 | 0.4364 | 0.4466 | 0.4568 | 0.4670 | 0.4772 | 0.4874 | 0.4976 | 0.5078 | 0.5180 | 0.5282 | 0.5384 | 0.5486 | 0.5588 | 0.5690 | 0.5792 | 0.5894 | 0.5996 | 0.6098 | 0.6199 |
| Wajir         | 0.1210 | 0.1256 | 0.1302 | 0.1348 | 0.1394 | 0.1440 | 0.1486 | 0.1532 | 0.1578 | 0.1624 | 0.1670 | 0.1716 | 0.1762 | 0.1808 | 0.1854 | 0.1900 | 0.1946 | 0.1992 | 0.2038 | 0.2084 | 0.2130 | 0.2176 | 0.2222 | 0.2268 | 0.2314 | 0.2360 | 0.2406 | 0.2452 | 0.2498 | 0.2544 | 0.2590 | 0.2636 | 0.2682 | 0.2728 | 0.2774 | 0.2820 | 0.2866 | 0.2912 |
| West Pokot    | 0.1638 | 0.1694 | 0.1750 | 0.1806 | 0.1862 | 0.1918 | 0.1974 | 0.2030 | 0.2086 | 0.2142 | 0.2198 | 0.2254 | 0.2310 | 0.2366 | 0.2422 | 0.2478 | 0.2534 | 0.2590 | 0.2646 | 0.2702 | 0.2758 | 0.2814 | 0.2870 | 0.2926 | 0.2982 | 0.3038 | 0.3094 | 0.3150 | 0.3206 | 0.3262 | 0.3318 | 0.3374 | 0.3430 | 0.3486 | 0.3542 | 0.3598 | 0.3654 | 0.3710 |
| Wundwani      | 0.2553 | 0.2402 | 0.2443 | 0.2478 | 0.2515 | 0.2552 | 0.2588 | 0.2624 | 0.2661 | 0.2702 | 0.2742 | 0.2782 | 0.2822 | 0.2862 | 0.2902 | 0.2942 | 0.2982 | 0.3022 | 0.3062 | 0.3102 | 0.3142 | 0.3182 | 0.3222 | 0.3262 | 0.3302 | 0.3342 | 0.3382 | 0.3422 | 0.3462 | 0.3502 | 0.3542 | 0.3582 | 0.3622 | 0.3662 | 0.3702 | 0.3742 | 0.3782 | 0.3822 |
| Malawi        | 0.1588 | 0.1564 | 0.1554 | 0.1547 | 0.1557 | 0.1594 | 0.1673 | 0.1759 | 0.1835 | 0.1895 | 0.1938 | 0.1942 | 0.1921 | 0.1919 | 0.1951 | 0.1977 | 0.1997 | 0.2004 | 0.2121 | 0.2173 | 0.2218 | 0.2253 | 0.2288 | 0.2320 | 0.2359 | 0.2391 | 0.2424 | 0.2452 | 0.2476 | 0.2494 | 0.2502 | 0.2502 | 0.2502 | 0.2502 | 0.2502 | 0.2502 | 0.2502 | 0.2502 |
| Mozambique    | 0.0886 | 0.0901 | 0.0901 | 0.0860 | 0.0809 | 0.0779 | 0.0641 | 0.0602 | 0.0645 | 0.0692 | 0.0691 | 0.0710 | 0.0727 | 0.0740 | 0.0893 | 0.1065 | 0.1236 | 0.1310 | 0.1424 | 0.1540 | 0.1650 | 0.1755 | 0.1860 | 0.1960 | 0.2060 | 0.2160 | 0.2260 | 0.2360 | 0.2460 | 0.2560 | 0.2660 | 0.2760 | 0.2860 | 0.2960 | 0.3060 | 0.3160 | 0.3260 |        |
| Rwanda        | 0.1339 | 0.1359 | 0.1368 | 0.1388 | 0.1425 | 0.1489 | 0.1600 | 0.1731 | 0.1838 | 0.1964 | 0.2050 | 0.2083 | 0.2110 | 0.2127 | 0.2127 | 0.2093 | 0.2112 | 0.2144 | 0.2210 | 0.2273 | 0.2337 | 0.2397 | 0.2451 | 0.2509 | 0.2563 | 0.2614 | 0.2662 | 0.2708 | 0.2754 | 0.2800 | 0.2846 | 0.2892 | 0.2938 | 0.2984 | 0.3030 |        |        |        |

Appendix Figure 1. Co-evolution of the proportion of DALYs due to YLDs with SDI for the globe and GBD regions from 1990 to 2015, with comparison to the value of expected proportion of DALYs based on SDI alone.

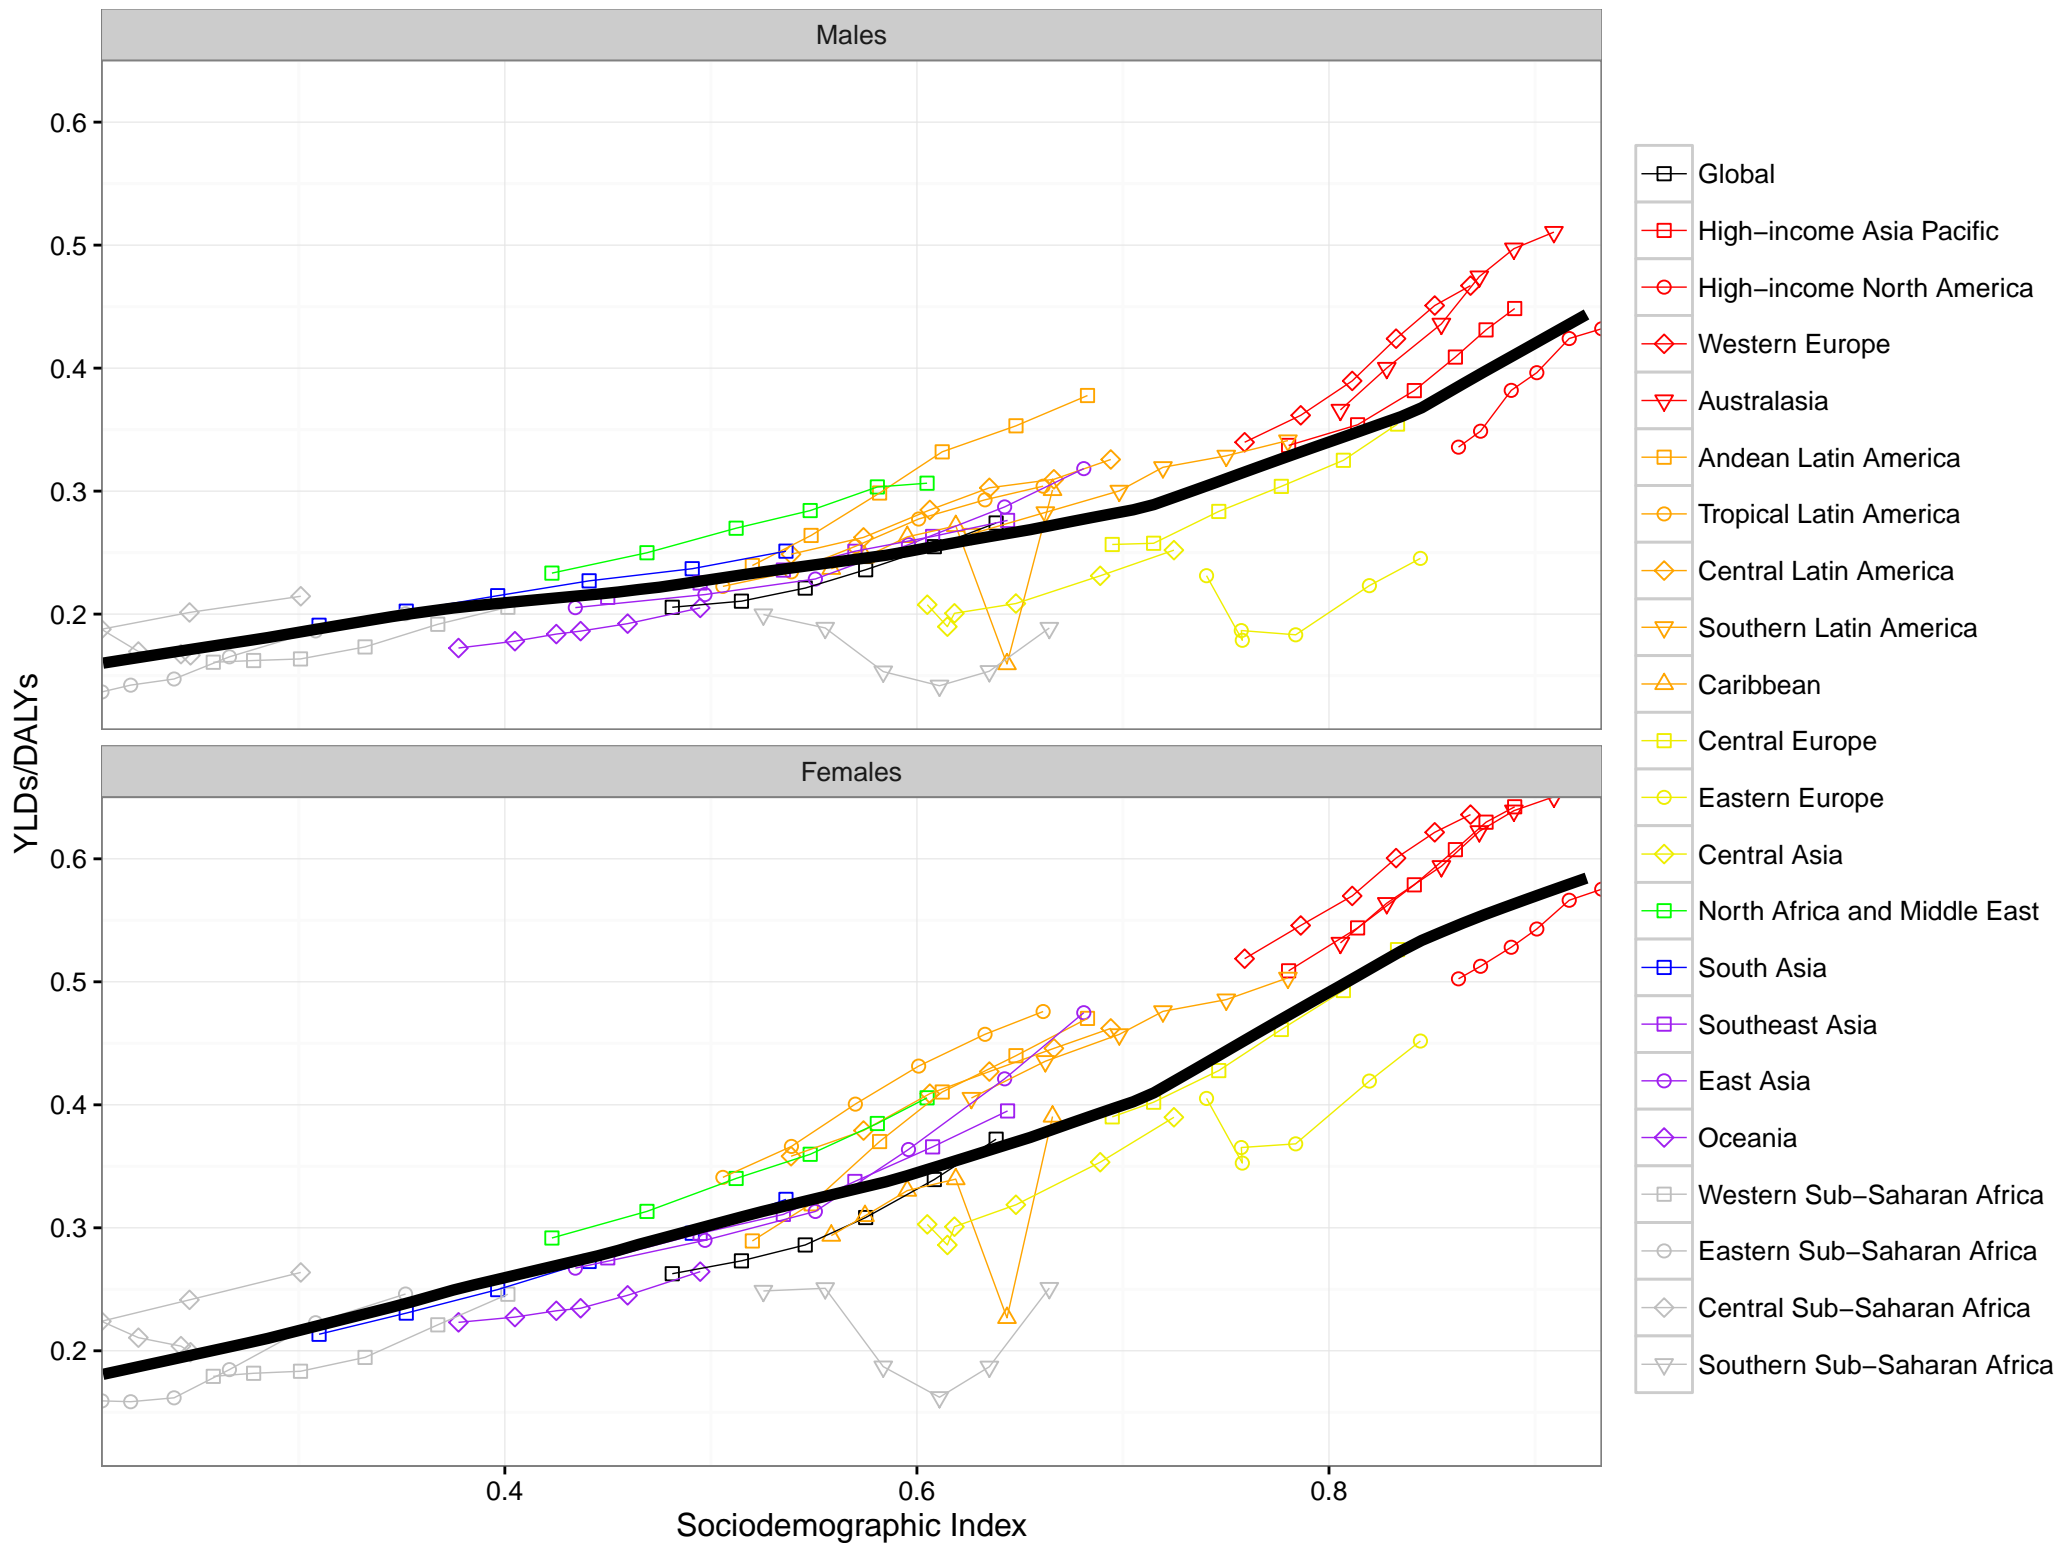

**Appendix Figure 2. Years of functional health lost computed as life expectancy at birth minus HALE at birth for both sexes combined, 2015.**  
**SDI = Socio-demographic Index. HALE = healthy life expectancy. LE = life expectancy.**

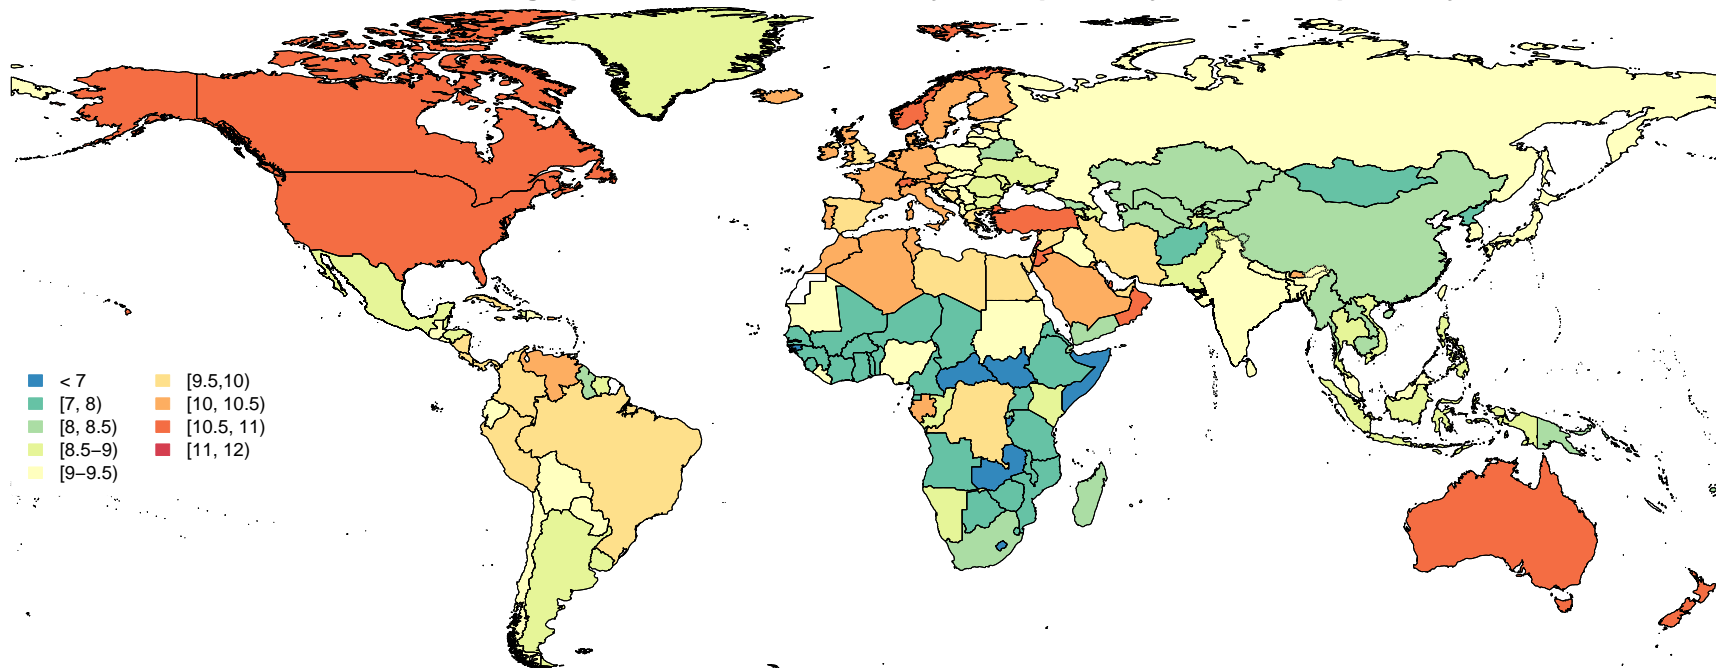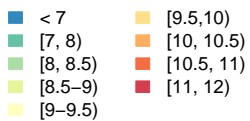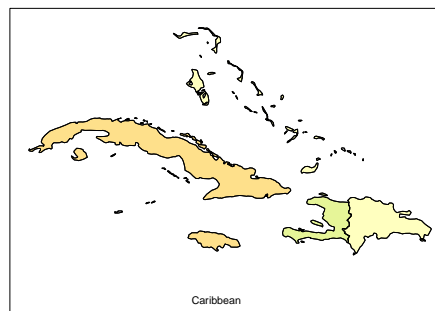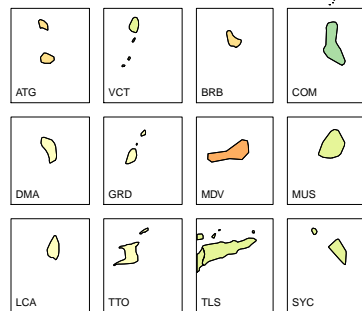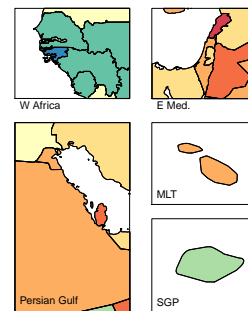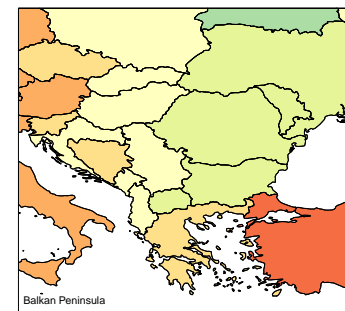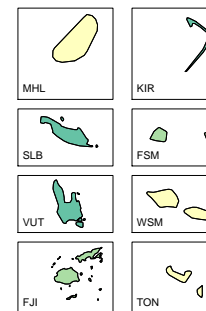

**Appendix Figure 3. Observed HALE at birth minus expected HALE at birth for both sexes combined, 2015.**  
**SDI = Socio-demographic Index. HALE = healthy life expectancy. LE = life expectancy.**

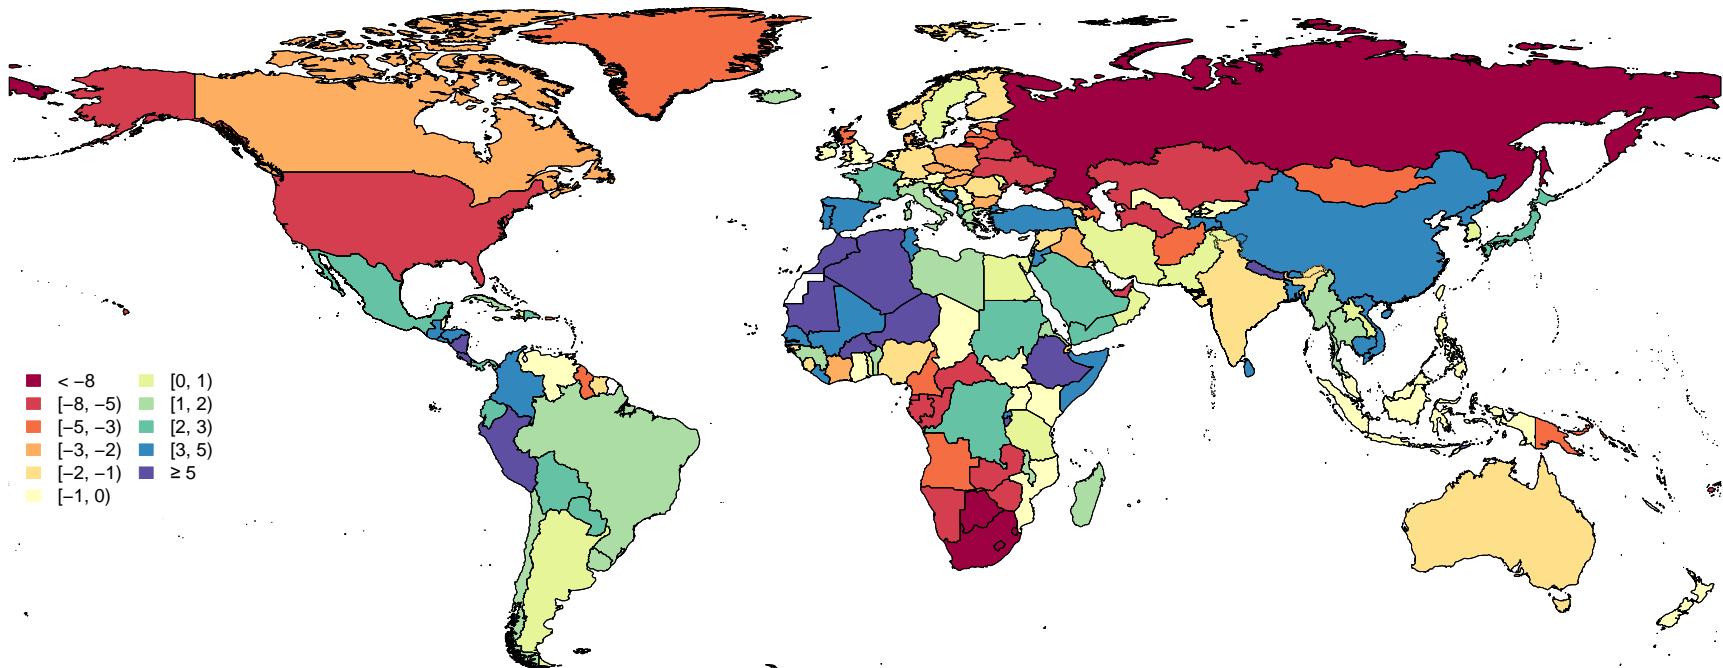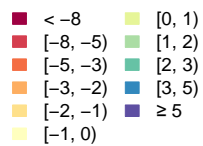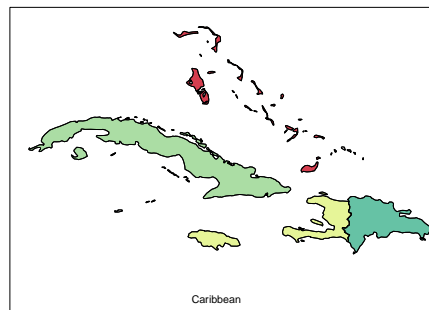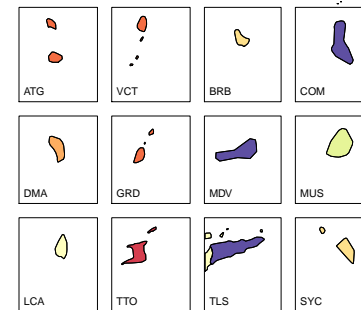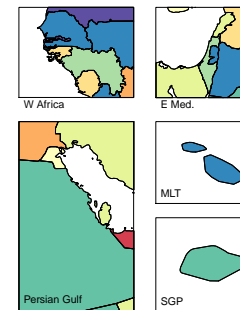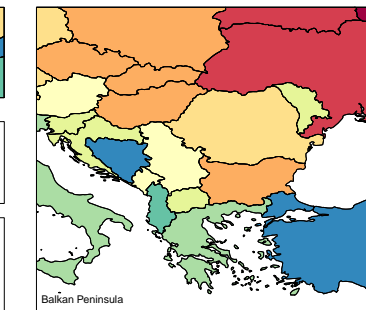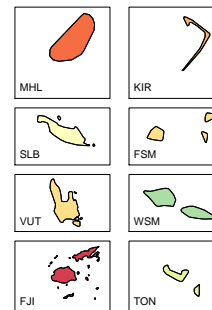

**Appendix Figure 4. Ratio of observed versus expected age-standardised DALY rates (per 100,000) on the basis of SDI alone for both sexes combined, 2005.**

**SDI = Socio-demographic Index. DALY = disability-adjusted life year.**

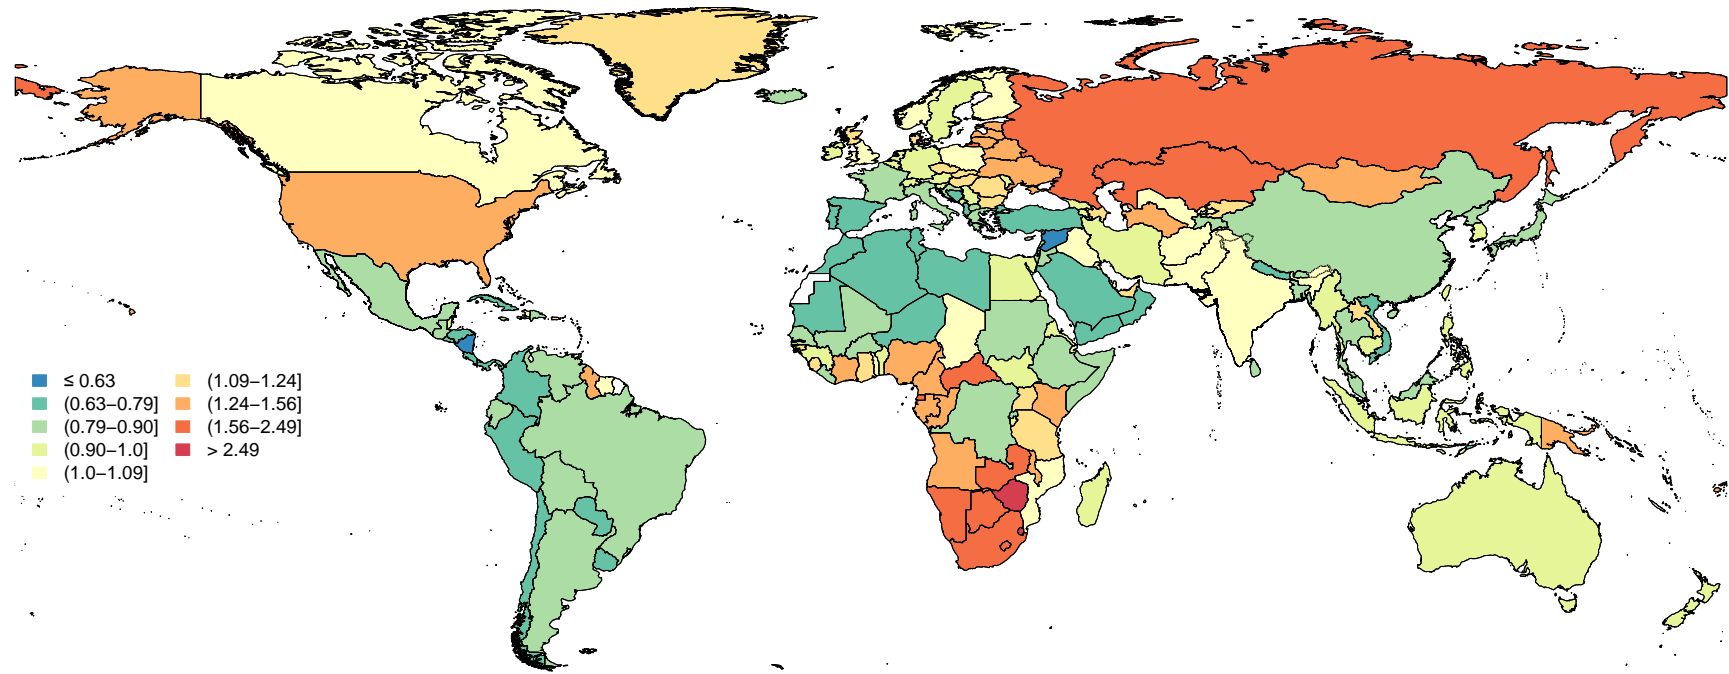

- ≤ 0.63
- (0.63–0.79]
- (0.79–0.90]
- (0.90–1.0]
- (1.0–1.09]
- (1.09–1.24]
- (1.24–1.56]
- (1.56–2.49]
- > 2.49

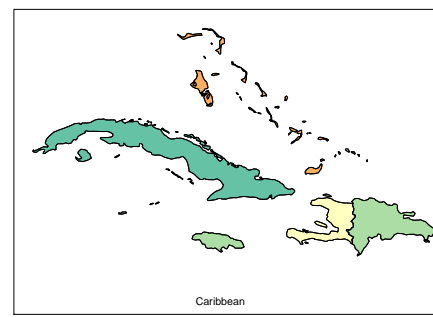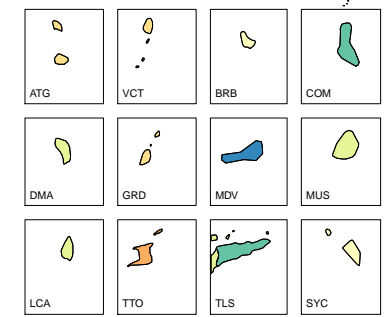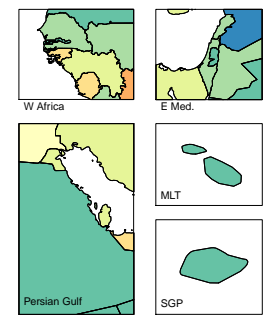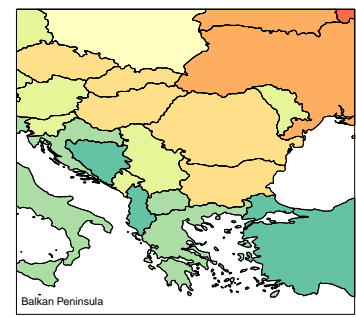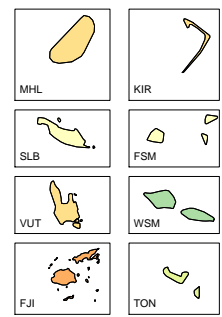



Appendix Figure 5B. Comparisons of GBD 2014 HALE at birth with EC 2014 HALE at birth.

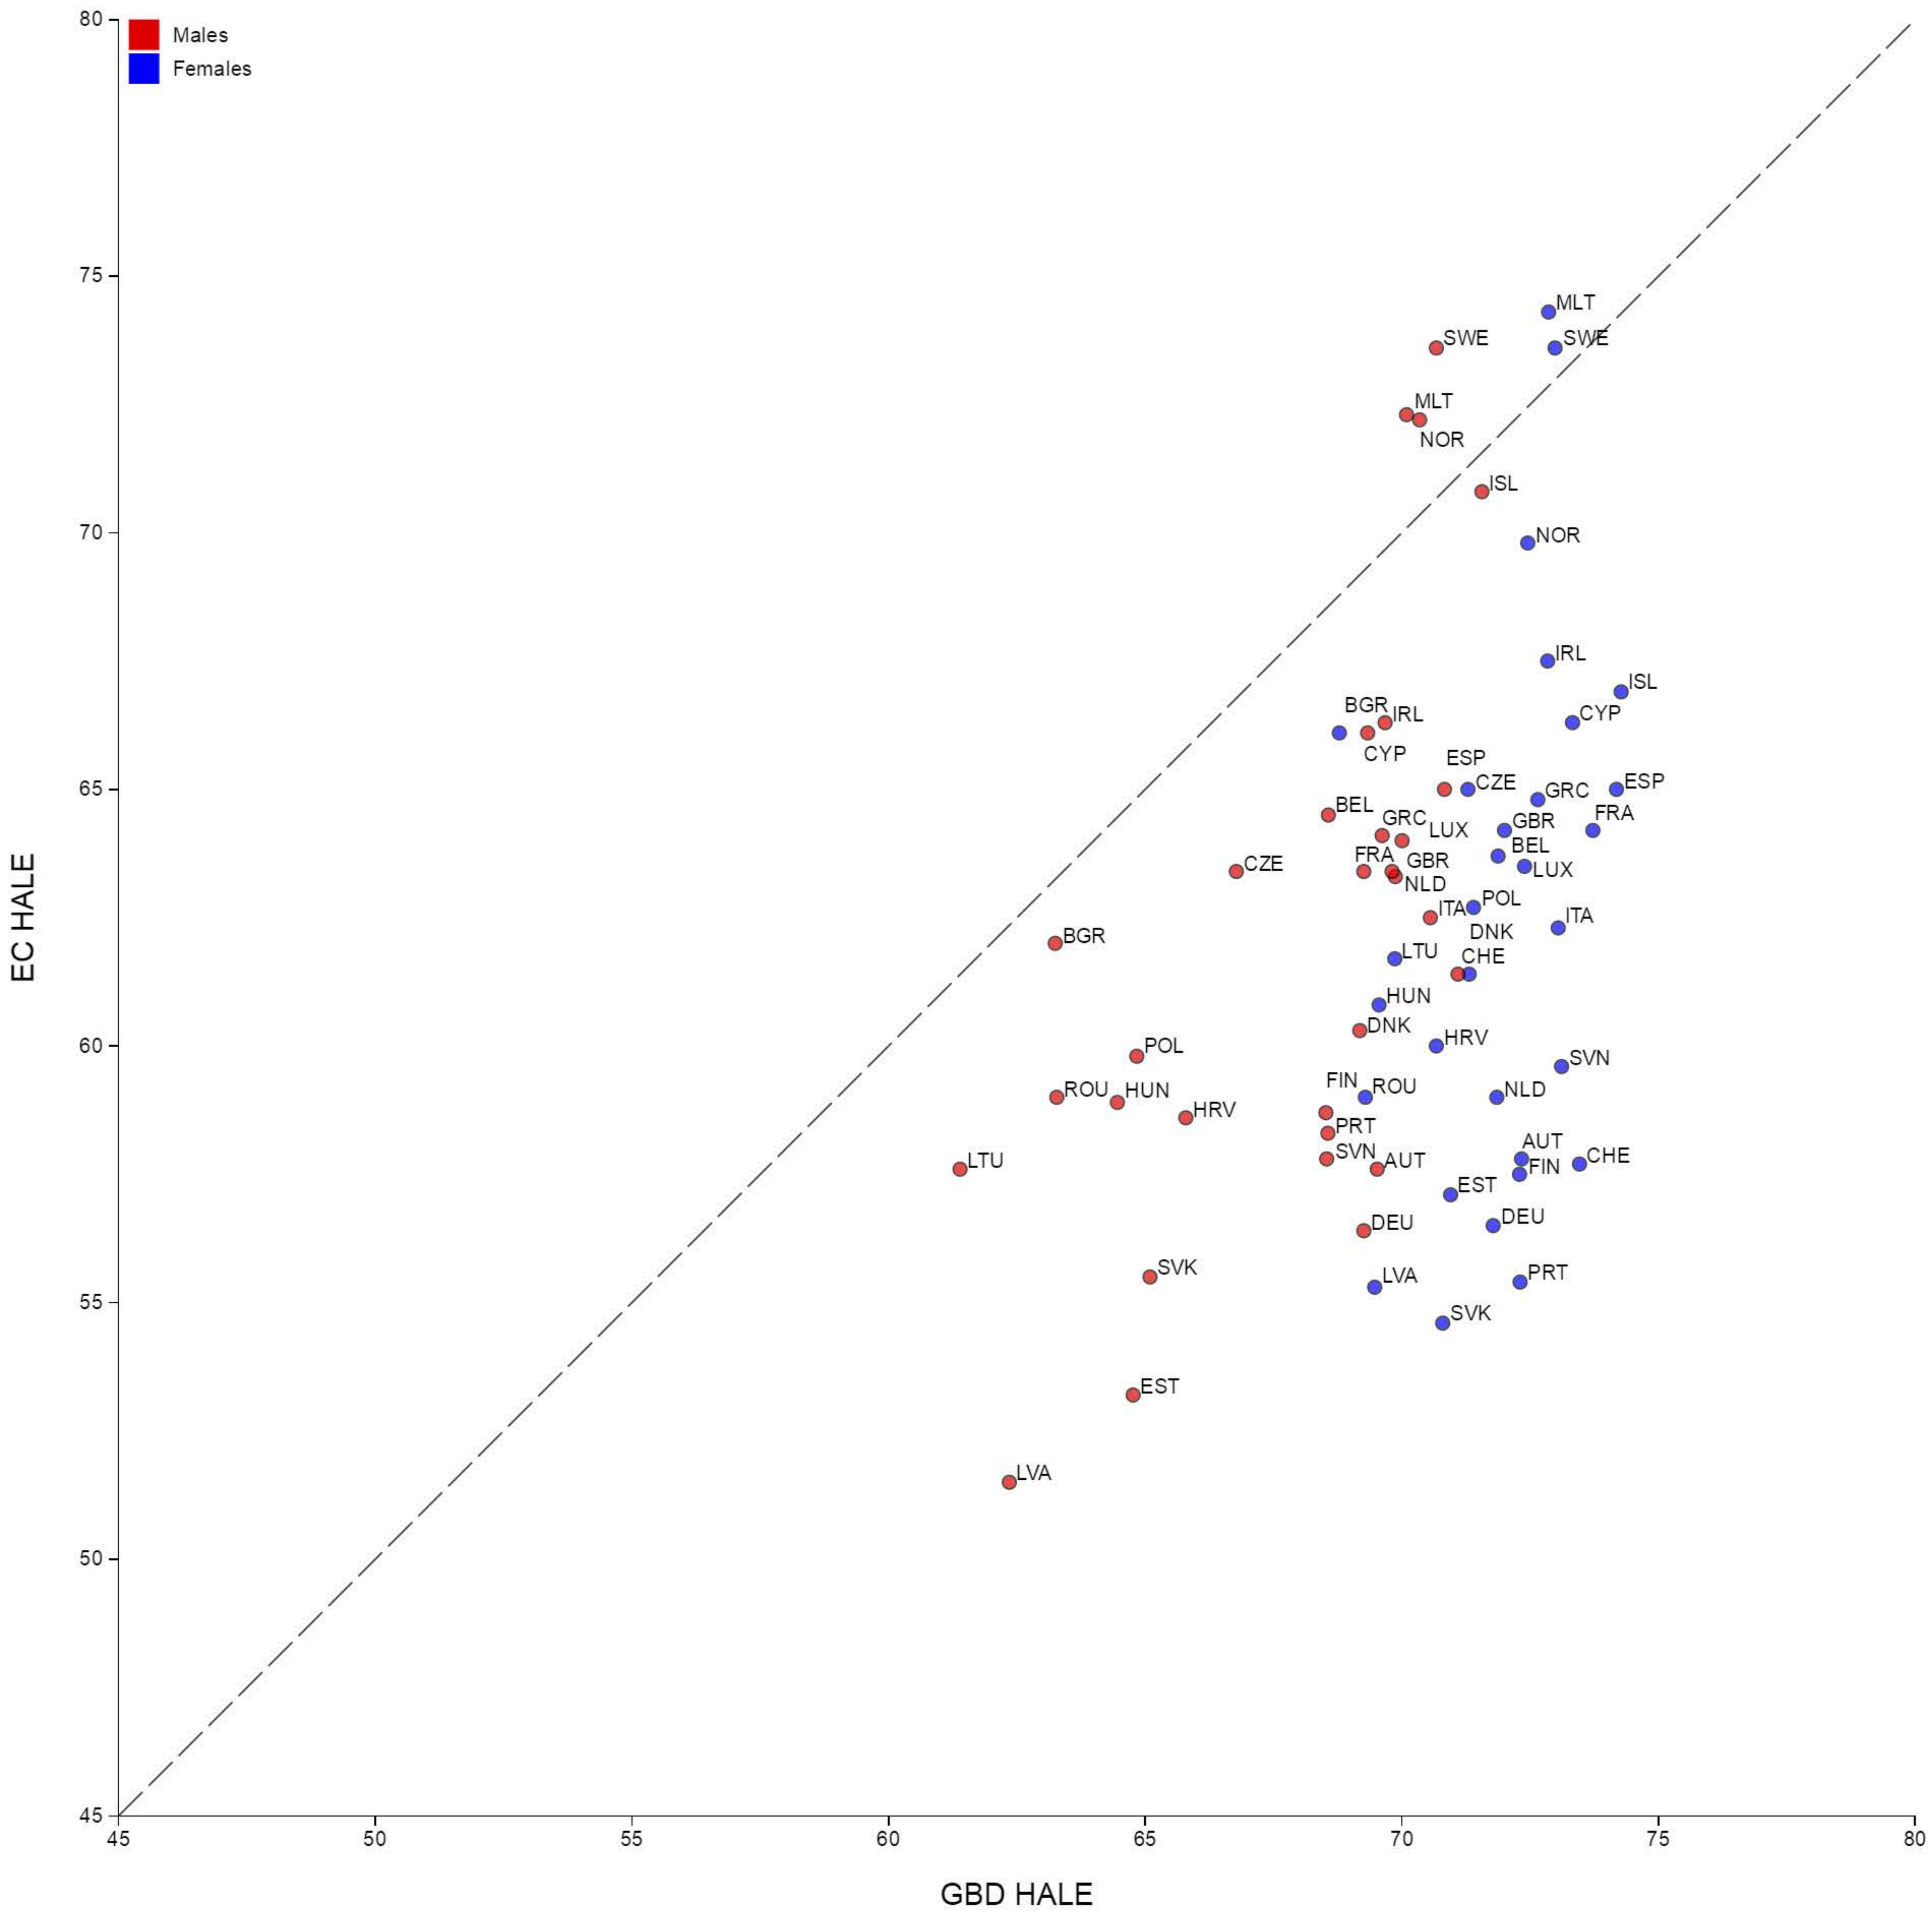

Appendix Figure 5C. Comparisons of GBD 2014 HALE at age 65 with EC 2014 HALE at age 65.

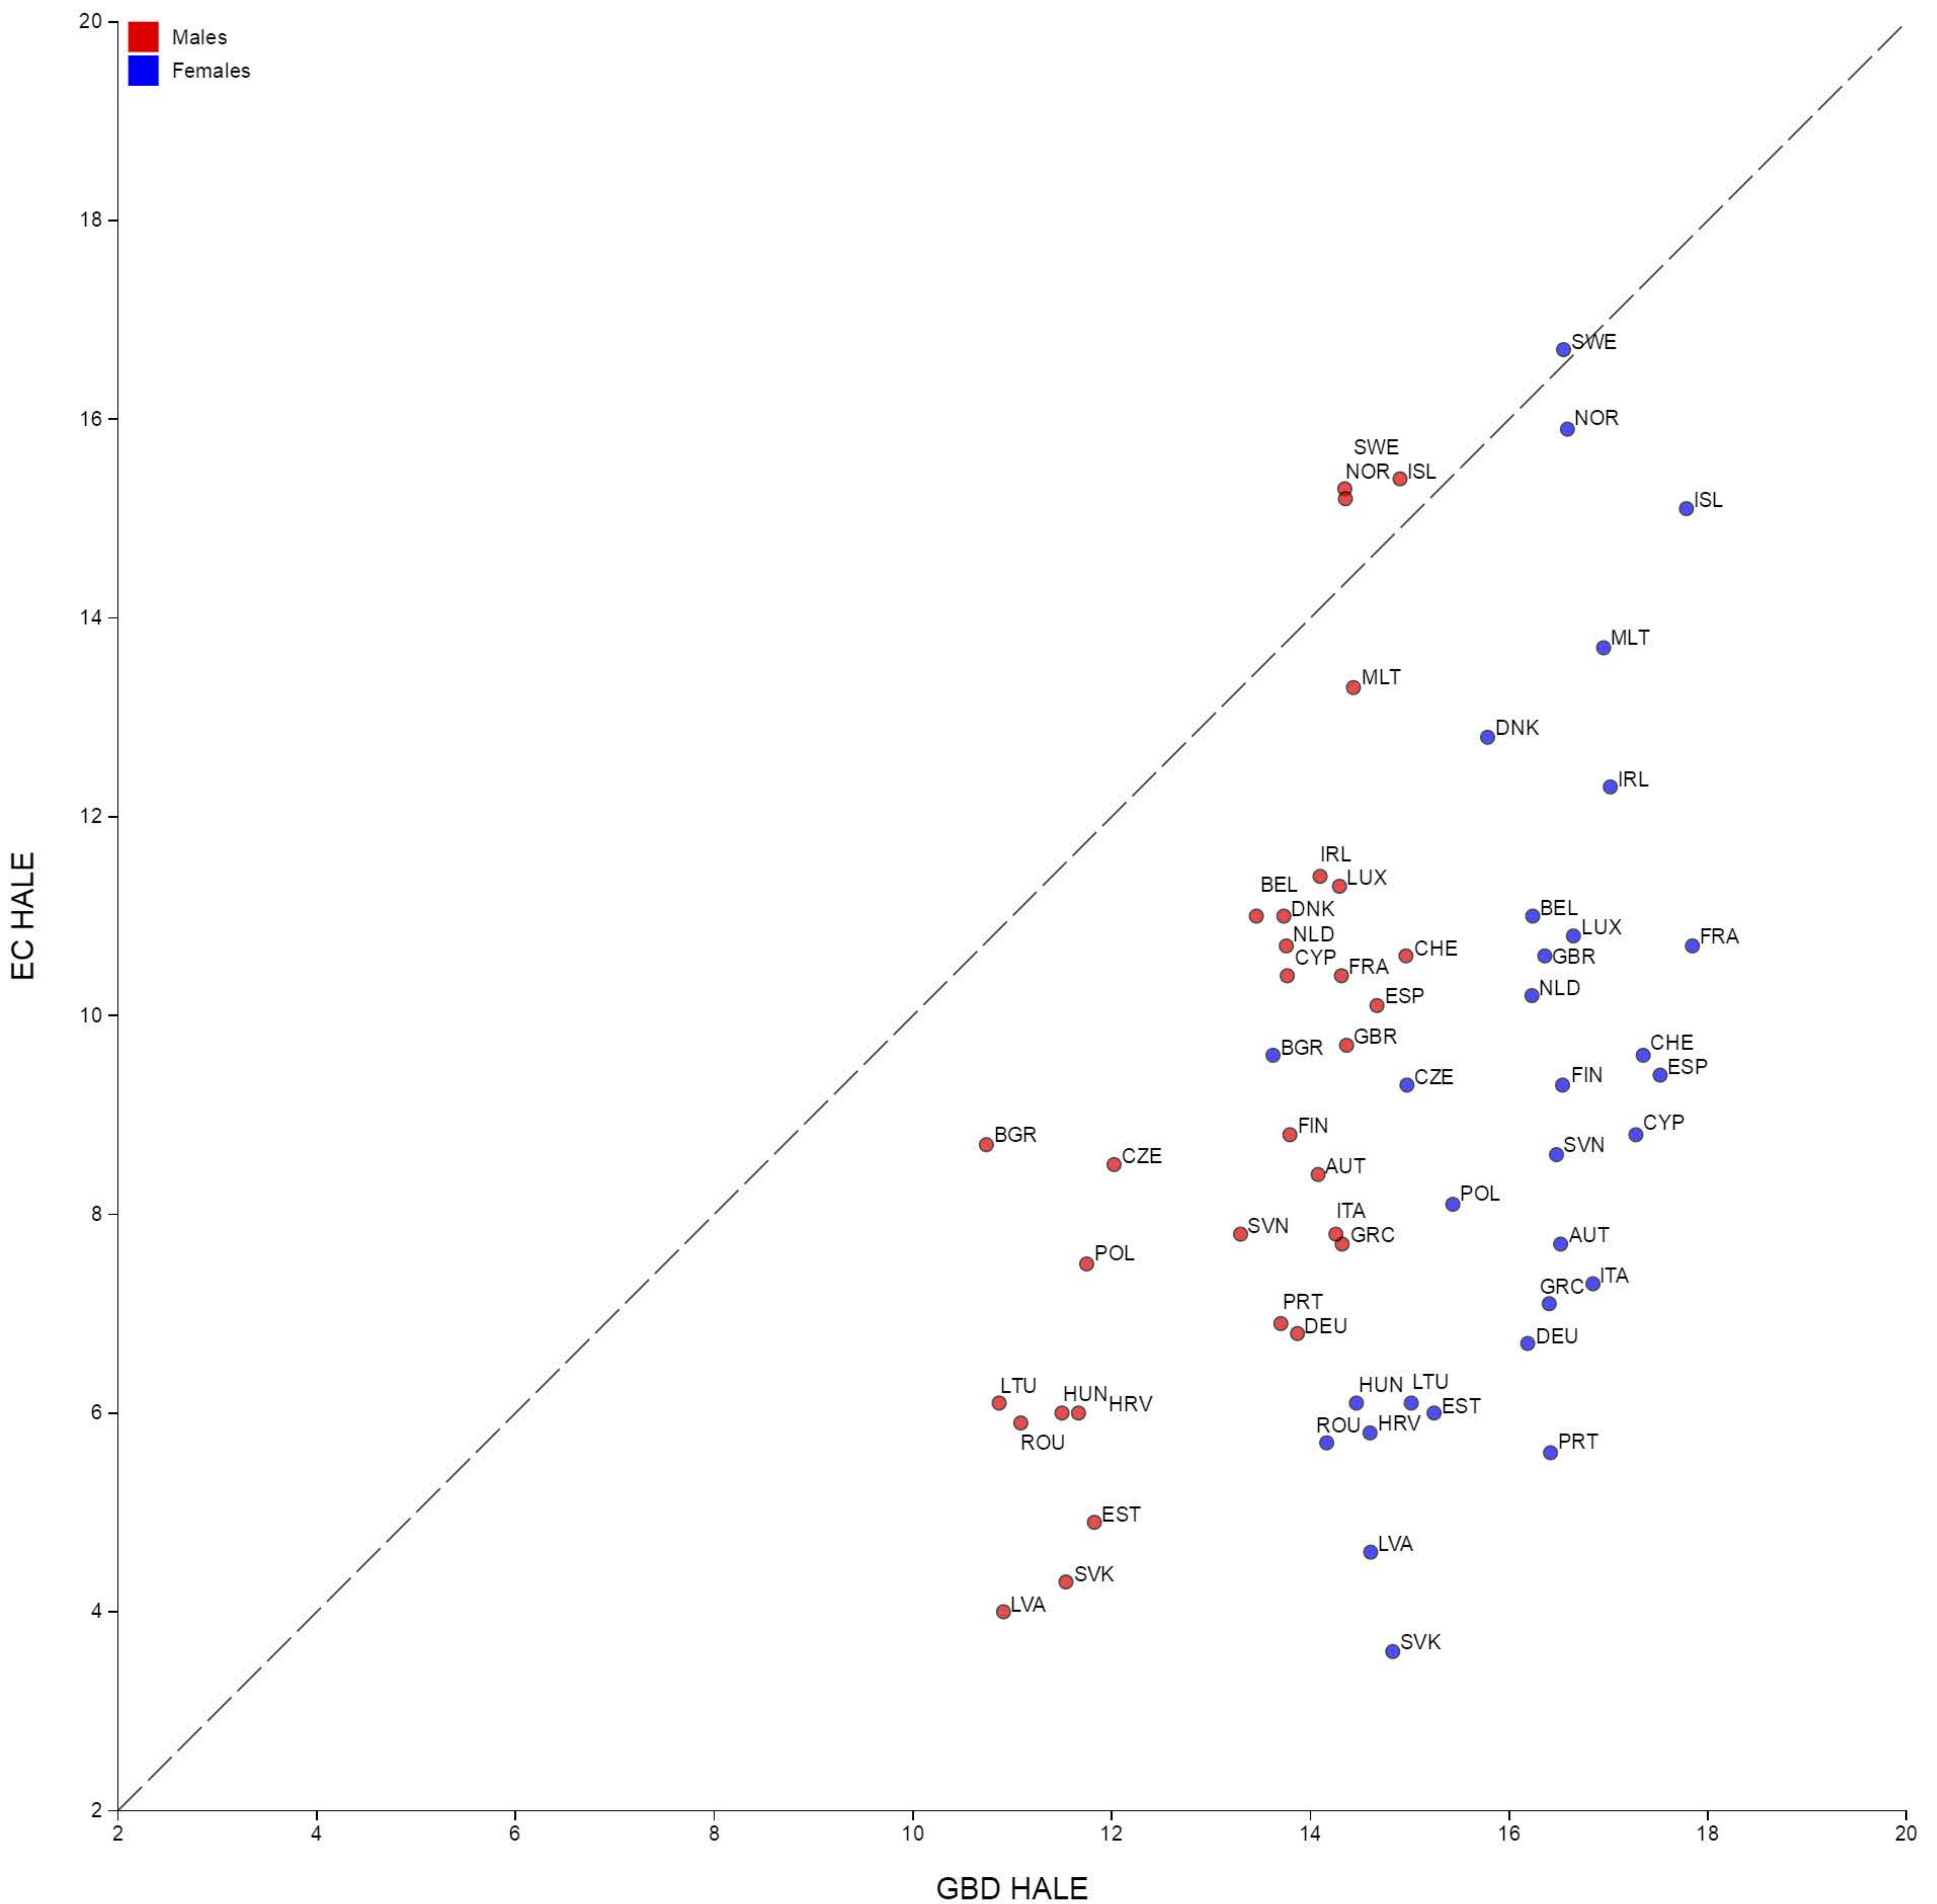

Supplement: mmc1.pdf [file mmc1.pdf]
